# Supplementary material for: A Single Molecule Scaffold for the Maize Genome
Source: PubMed Central journal article supplement (PMC2774507; doi:10.1371/journal.pgen.1000711), 2009-11-20
Supplement: pgen.1000711.s001.pdf [file pgen.1000711.s001.pdf]

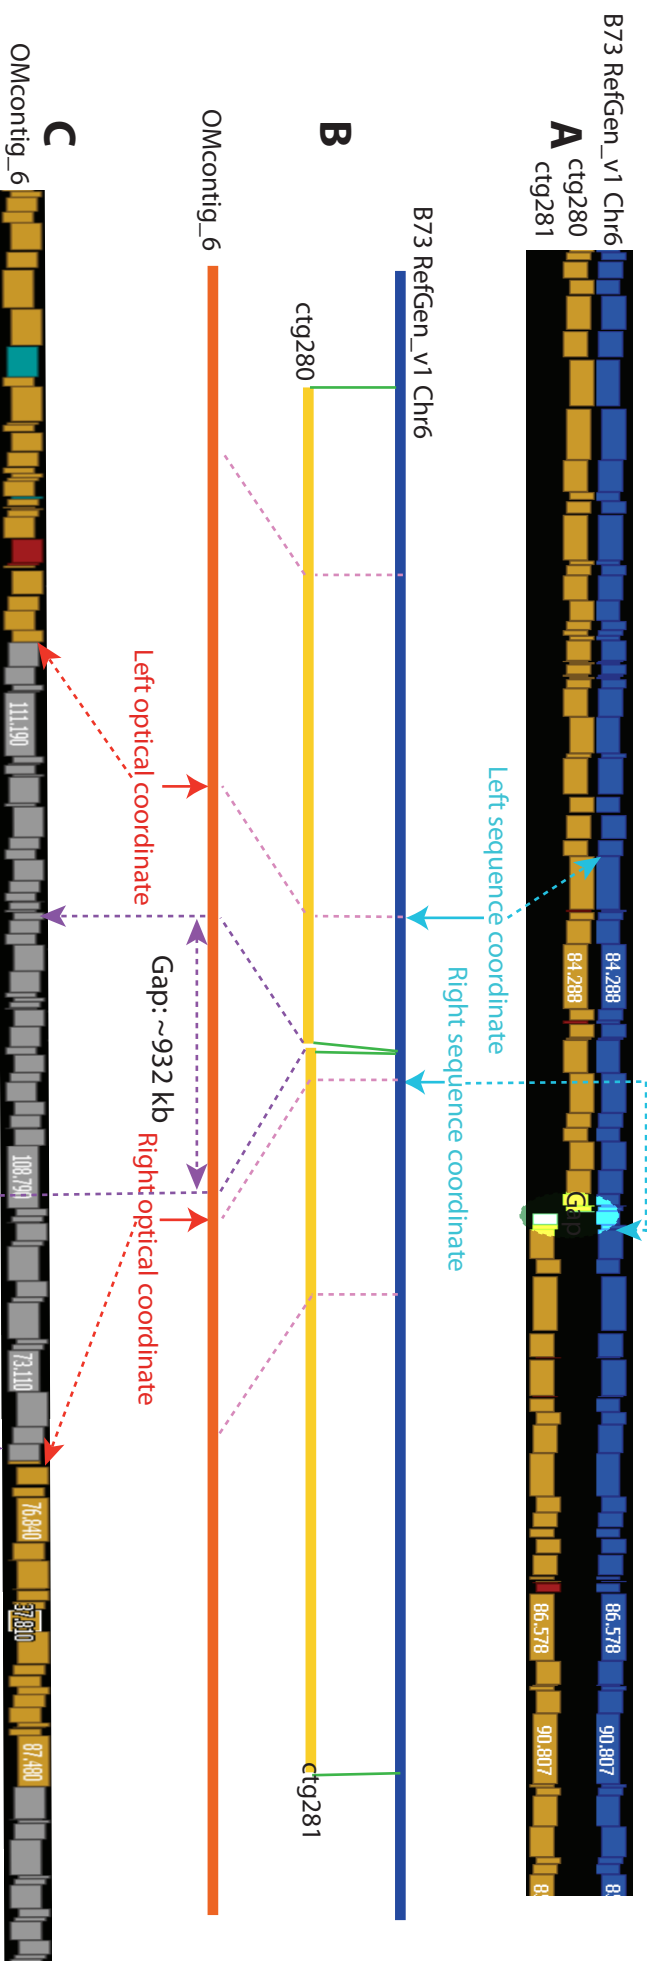

**Figure S1.** Using optical contigs to estimate sizes of gaps between adjacent FPC contigs. (A) Restriction map view (box = restriction fragment) of FPC contigs aligned to the AGP Chr 6 pseudomolecule; the gap is highlighted, with green lines showing the alignments of FPC contigs ctg280 and ctg281 to Chr6 pseudomolecule. A gap of unknown size is illustrated, with green lines showing alignment to the pseudomolecule. Dashed lines show alignments of ctg280 and ctg281 against OMcontig\_6 (gold track) and a large gap. (C) Restriction map view of OMcontig\_6, locating the large gap within the grayed restriction fragments. FPC gap sizes are calculated as:  
 Gap (kb) =  $\lfloor (\text{right optical coordinate}) - (\text{left optical coordinate}) \rfloor / 1000$
