# Supplementary material for: A Single Molecule Scaffold for the Maize Genome
Source: PubMed Central journal article supplement (PMC2774507; doi:10.1371/journal.pgen.1000711), 2009-11-20
Supplement: pgen.1000711.s003.pdf [file pgen.1000711.s003.pdf]

Discordances in the well-aligned map segments between optical maps and the *in silico* maps of the B73 RefGen\_v1 reference chromosomes

| Discordance ID | Chr. No. | Start Coordinate (bp) | End Coordinate (bp) | Cut Classification | Size Classification     | Start Location | End Location | Cut Location | Length Change | Length P Value | Cut P Value | Optical Map Span | Optical Map Align | Variation type | p value  | comments |
|----------------|----------|-----------------------|---------------------|--------------------|-------------------------|----------------|--------------|--------------|---------------|----------------|-------------|------------------|-------------------|----------------|----------|----------|
| 1-381          | 1        | 124387615             | 124415360           | EC                 | Extra sequence included | 124387615      | 124415360    |              | -5621         | 7.12E-23       |             | 59               | 40                | DEL            | 7.12E-23 |          |
| 1-599          | 1        | 204871100             | 204922921           | EC                 | Extra sequence included | 204871100      | 204922921    |              | -5998         | 1.50E-18       |             | 68               | 34                | DEL            | 1.50E-18 |          |
| 2-213          | 2        | 81943946              | 82028026            | EC                 | Extra sequence included | 81943946       | 82028026     |              | -27273        | 7.27E-23       |             | 45               | 39                | DEL            | 7.27E-23 |          |
| 2-250          | 2        | 96078634              | 96136949            | EC                 | Extra sequence included | 96078634       | 96136949     |              | -21440        | 7.27E-23       |             | 69               | 52                | DEL            | 7.27E-23 |          |
| 3-66           | 3        |                       |                     | EC                 | Extra sequence included | 37063663       | 37138218     |              | -17544        | 7.24E-23       |             | 40               | 35                | DEL            | 7.24E-23 |          |
| 3-204          | 3        | 83247546              | 83300973            | EC                 | Extra sequence included | 83247546       | 83300973     |              | -10434        | 7.24E-23       |             | 50               | 32                | DEL            | 7.24E-23 |          |
| 3-380          | 3        | 163225783             | 163291740           | EC                 | Extra sequence included | 163225783      | 163291740    |              | -12749        | 1.08E-22       |             | 58               | 42                | DEL            | 1.08E-22 |          |
| 3-500          | 3        | 211484020             | 211614840           | EC                 | Extra sequence included | 211484020      | 211614840    |              | -39971        | 7.24E-23       |             | 47               | 42                | DEL            | 7.24E-23 |          |
| 4-252          | 4        | 96201978              | 96390772            | EC                 | Extra sequence included | 96201978       | 96390772     |              | -20135        | 7.53E-13       |             | 24               | 24                | DEL            | 7.53E-13 |          |
| 4-365          | 4        | 145712333             | 145787153           | EC                 | Extra sequence included | 145712333      | 145787153    |              | -8322         | 7.57E-23       |             | 63               | 52                | DEL            | 7.57E-23 |          |
| 8-165          | 8        | 56026565              | 56111289            | EC                 | Extra sequence included | 56026565       | 56111289     |              | -52245        | 8.64E-23       |             | 73               | 57                | DEL            | 8.64E-23 |          |
| 1-3            | 1        | 2232916               | 2232916             | EC                 | NONE                    |                |              | 2232916      | 0             |                | 5.44E-23    | 61               | 52                | EC             | 5.44E-23 |          |
| 1-4            | 1        | 2329308               | 2329308             | EC                 | NONE                    |                |              | 2329308      | 0             |                | 1.62E-31    | 58               | 53                | EC             | 1.62E-31 |          |
| 1-9            | 1        | 5242930               | 5242930             | EC                 | NONE                    |                |              | 5242930      | 0             |                | 3.17E-43    | 57               | 47                | EC             | 3.17E-43 |          |
| 1-24           | 1        | 9573678               | 9573678             | EC                 | NONE                    |                |              | 9573678      | 0             |                | 1.34E-36    | 77               | 67                | EC             | 1.34E-36 |          |
| 1-32           | 1        | 11190068              | 11190068            | EC                 | NONE                    |                |              | 11190068     | 0             |                | 8.61E-08    | 30               | 27                | EC             | 8.61E-08 |          |
| 1-36           | 1        | 12008871              | 12008871            | EC                 | NONE                    |                |              | 12008871     | 0             |                | 5.90E-37    | 79               | 68                | EC             | 5.90E-37 |          |
| 1-37           | 1        | 12202222              | 12202222            | EC                 | NONE                    |                |              | 12202222     | 0             |                | 2.84E-35    | 69               | 59                | EC             | 2.84E-35 |          |
| 1-38           | 1        | 12490201              | 12490201            | EC                 | NONE                    |                |              | 12490201     | 0             |                | 7.94E-41    | 74               | 59                | EC             | 7.94E-41 |          |
| 1-41           | 1        | 12743586              | 12743586            | EC                 | NONE                    |                |              | 12743586     | 0             |                | 1.09E-23    | 78               | 66                | EC             | 1.09E-23 |          |
| 1-56           | 1        | 14823530              | 14823530            | EC                 | NONE                    |                |              | 14823530     | 0             |                | 2.12E-42    | 82               | 71                | EC             | 2.12E-42 |          |
| 1-60           | 1        | 15893107              | 15893107            | EC                 | NONE                    |                |              | 15893107     | 0             |                | 6.20E-10    | 42               | 41                | EC             | 6.20E-10 |          |
| 1-67           | 1        | 17404177              | 17404177            | EC                 | NONE                    |                |              | 17404177     | 0             |                | 1.75E-38    | 70               | 64                | EC             | 1.75E-38 |          |
| 1-90           | 1        | 33315694              | 33315694            | EC                 | NONE                    |                |              | 33315694     | 0             |                | 1.04E-35    | 43               | 34                | EC             | 1.04E-35 |          |
| 1-111          | 1        | 42578913              | 42578913            | EC                 | NONE                    |                |              | 42578913     | 0             |                | 2.73E-14    | 41               | 36                | EC             | 2.73E-14 |          |
| 1-112          | 1        | 44503513              | 44503513            | EC                 | NONE                    |                |              | 44503513     | 0             |                | 3.40E-10    | 66               | 54                | EC             | 3.40E-10 |          |
| 1-114          | 1        | 44868494              | 44868494            | EC                 | NONE                    |                |              | 44868494     | 0             |                | 1.41E-49    | 56               | 55                | EC             | 1.41E-49 |          |
| 1-128          | 1        | 53785978              | 53785978            | EC                 | NONE                    |                |              | 53785978     | 0             |                | 1.57E-36    | 69               | 62                | EC             | 1.57E-36 |          |
| 1-131          | 1        | 54273646              | 54273646            | EC                 | NONE                    |                |              | 54273646     | 0             |                | 1.62E-22    | 55               | 50                | EC             | 1.62E-22 |          |
| 1-141          | 1        | 57283701              | 57283701            | EC                 | NONE                    |                |              | 57283701     | 0             |                | 2.76E-38    | 72               | 64                | EC             | 2.76E-38 |          |
| 1-142          | 1        | 57332625              | 57332625            | EC                 | NONE                    |                |              | 57332625     | 0             |                | 8.60E-40    | 73               | 58                | EC             | 8.60E-40 |          |
| 1-148          | 1        | 57996572              | 57996572            | EC                 | NONE                    |                |              | 57996572     | 0             |                | 7.53E-42    | 81               | 69                | EC             | 7.53E-42 |          |
| 1-156          | 1        | 59512334              | 59512334            | EC                 | NONE                    |                |              | 59512334     | 0             |                | 3.07E-38    | 83               | 67                | EC             | 3.07E-38 |          |
| 1-167          | 1        | 61577140              | 61577140            | EC                 | NONE                    |                |              | 61577140     | 0             |                | 5.86E-73    | 86               | 74                | EC             | 5.86E-73 |          |
| 1-168          | 1        | 61610153              | 61610153            | EC                 | NONE                    |                |              | 61610153     | 0             |                | 2.79E-66    | 85               | 69                | EC             | 2.79E-66 |          |
| 1-169          | 1        | 61865860              | 61865860            | EC                 | NONE                    |                |              | 61865860     | 0             |                | 3.30E-67    | 90               | 78                | EC             | 3.30E-67 |          |
| 1-170          | 1        | 62250738              | 62250738            | EC                 | NONE                    |                |              | 62250738     | 0             |                | 8.18E-43    | 55               | 49                | EC             | 8.18E-43 |          |
| 1-175          | 1        | 63663651              | 63663651            | EC                 | NONE                    |                |              | 63663651     | 0             |                | 2.32E-16    | 61               | 55                | EC             | 2.32E-16 |          |
| 1-176          | 1        | 63672161              | 63672161            | EC                 | NONE                    |                |              | 63672161     | 0             |                | 4.48E-23    | 69               | 66                | EC             | 4.48E-23 |          |
| 1-211          | 1        | 75922535              | 75922535            | EC                 | NONE                    |                |              | 75922535     | 0             |                | 4.77E-25    | 56               | 43                | EC             | 4.77E-25 |          |
| 1-213          | 1        | 77394280              | 77394280            | EC                 | NONE                    |                |              | 77394280     | 0             |                | 1.56E-20    | 44               | 39                | EC             | 1.56E-20 |          |
| 1-215          | 1        | 79345845              | 79345845            | EC                 | NONE                    |                |              | 79345845     | 0             |                | 1.92E-35    | 46               | 38                | EC             | 1.92E-35 |          |
| 1-225          | 1        | 80910757              | 80910757            | EC                 | NONE                    |                |              | 80910757     | 0             |                | 1.79E-23    | 79               | 67                | EC             | 1.79E-23 |          |
| 1-230          | 1        | 82205240              | 82205240            | EC                 | NONE                    |                |              | 82205240     | 0             |                | 2.81E-21    | 69               | 56                | EC             | 2.81E-21 |          |
| 1-243          | 1        | 87892101              | 87892101            | EC                 | NONE                    |                |              | 87892101     | 0             |                | 1.45E-18    | 53               | 47                | EC             | 1.45E-18 |          |
| 1-245          | 1        | 88024773              | 88024773            | EC                 | NONE                    |                |              | 88024773     | 0             |                | 9.16E-42    | 57               | 53                | EC             | 9.16E-42 |          |
| 1-252          | 1        | 89173857              | 89173857            | EC                 | NONE                    |                |              | 89173857     | 0             |                | 9.32E-49    | 63               | 54                | EC             | 9.32E-49 |          |
| 1-257          | 1        | 90633492              | 90633492            | EC                 | NONE                    |                |              | 90633492     | 0             |                | 4.44E-59    | 69               | 64                | EC             | 4.44E-59 |          |
| 1-267          | 1        | 93185024              | 93185024            | EC                 | NONE                    |                |              | 93185024     | 0             |                | 2.13E-22    | 74               | 61                | EC             | 2.13E-22 |          |
| 1-269          | 1        | 94015267              | 94015267            | EC                 | NONE                    |                |              | 94015267     | 0             |                | 1.52E-47    | 78               | 63                | EC             | 1.52E-47 |          |
| 1-288          | 1        | 101638956             | 101638956           | EC                 | NONE                    |                |              | 101638956    | 0             |                | 2.44E-14    | 39               | 30                | EC             | 2.44E-14 |          |
| 1-292          | 1        | 102350586             | 102350586           | EC                 | NONE                    |                |              | 102350586    | 0             |                | 1.10E-29    | 60               | 54                | EC             | 1.10E-29 |          |
| 1-297          | 1        | 103336446             | 103336446           | EC                 | NONE                    |                |              | 103336446    | 0             |                | 1.55E-25    | 47               | 36                | EC             | 1.55E-25 |          |
| 1-324          | 1        | 109747656             | 109747656           | EC                 | NONE                    |                |              | 109747656    | 0             |                | 9.80E-17    | 41               | 37                | EC             | 9.80E-17 |          |
| 1-339          | 1        | 111926815             | 111926815           | EC                 | NONE                    |                |              | 111926815    | 0             |                | 4.86E-58    | 72               | 65                | EC             | 4.86E-58 |          |
| 1-342          | 1        | 112544412             | 112544412           | EC                 | NONE                    |                |              | 112544412    | 0             |                | 8.81E-19    | 51               | 43                | EC             | 8.81E-19 |          |
| 1-351          | 1        | 114167533             | 114167533           | EC                 | NONE                    |                |              | 114167533    | 0             |                | 2.28E-30    | 90               | 73                | EC             | 2.28E-30 |          |
| 1-353          | 1        | 114967276             | 114967276           | EC                 | NONE                    |                |              | 114967276    | 0             |                | 1.56E-29    | 53               | 41                | EC             | 1.56E-29 |          |
| 1-367          | 1        | 119932623             | 119932623           | EC                 | NONE                    |                |              | 119932623    | 0             |                | 2.04E-14    | 42               | 36                | EC             | 2.04E-14 |          |
| 1-397          | 1        | 129750238             | 129750238           | EC                 | NONE                    |                |              | 129750238    | 0             |                | 1.33E-46    | 76               | 66                | EC             | 1.33E-46 |          |
| 1-405          | 1        | 134145776             | 134145776           | EC                 | NONE                    |                |              | 134145776    | 0             |                | 3.34E-27    | 38               | 29                | EC             | 3.34E-27 |          |
| 1-410          | 1        | 135476495             | 135476495           | EC                 | NONE                    |                |              | 135476495    | 0             |                | 1.27E-27    | 61               | 52                | EC             | 1.27E-27 |          |
| 1-420          | 1        | 140911184             | 140911184           | EC                 | NONE                    |                |              | 140911184    | 0             |                | 1.95E-28    | 60               | 46                | EC             | 1.95E-28 |          |
| 1-425          | 1        | 142117411             | 142117411           | EC                 | NONE                    |                |              | 142117411    | 0             |                | 2.09E-19    | 57               | 47                | EC             | 2.09E-19 |          |
| 1-429          | 1        | 143465721             | 143465721           | EC                 | NONE                    |                |              | 143465721    | 0             |                | 1.14E-41    | 70               | 62                | EC             | 1.14E-41 |          |
| 1-434          | 1        | 144758126             | 144758126           | EC                 | NONE                    |                |              | 144758126    | 0             |                | 2.45E-23    | 65               | 59                | EC             | 2.45E-23 |          |
| 1-447          | 1        | 153925092             | 153925092           | EC                 | NONE                    |                |              | 153925092    | 0             |                | 4.41E-32    | 68               | 66                | EC             | 4.41E-32 |          |
| 1-451          | 1        | 154435216             | 154435216           | EC                 | NONE                    |                |              | 154435216    | 0             |                | 3.89E-78    | 90               | 74                | EC             | 3.89E-78 |          |
| 1-464          | 1        | 157859989             | 157859989           | EC                 | NONE                    |                |              | 157859989    | 0             |                | 1.97E-39    | 69               | 59                | EC             | 1.97E-39 |          |
| 1-470          | 1        | 158984712             | 158984712           | EC                 | NONE                    |                |              | 158984712    | 0             |                | 2.71E-25    | 51               | 43                | EC             | 2.71E-25 |          |
| 1-480          | 1        | 161210340             | 161210340           | EC                 | NONE                    |                |              | 161210340    | 0             |                | 1.99E-06    | 24               | 24                | EC             | 1.99E-06 |          |
| 1-489          | 1        | 163579668             | 163579668           | EC                 | NONE                    |                |              | 163579668    | 0             |                | 2.23E-39    | 67               | 64                | EC             | 2.23E-39 |          |
| 1-511          | 1        | 169111119             | 169111119           | EC                 | NONE                    |                |              | 169111119    | 0             |                | 2.43E-31    | 49               | 44                | EC             | 2.43E-31 |          |
| 1-513          | 1        | 169750552             | 169750552           | EC                 | NONE                    |                |              | 169750552    | 0             |                | 2.52E-23    | 49               | 48                | EC             | 2.52E-23 |          |
| 1-521          | 1        | 172321994             | 172321994           | EC                 | NONE                    |                |              | 172321994    | 0             |                | 4.44E-22    | 67               | 51                | EC             | 4.44E-22 |          |
| 1-528          | 1        | 174098838             | 174098838           | EC                 | NONE                    |                |              | 174098838    | 0             |                | 5.28E-26    | 82               | 65                | EC             | 5.28E-26 |          |
| 1-531          | 1        | 174720586             | 174720586           | EC                 | NONE                    |                |              | 174720586    | 0             |                | 4.01E-31    | 66               | 60                | EC             | 4.01E-31 |          |
| 1-535          | 1        | 175287528             | 175287528           | EC                 | NONE                    |                |              | 175287528    | 0             |                | 6.85E-56    | 92               | 82                | EC             | 6.85E-56 |          |
| 1-543          | 1        | 180914571             | 180914571           | EC                 | NONE                    |                |              | 180914571    | 0             |                | 6.32E-35    | 64               | 60                | EC             | 6.32E-35 |          |
| 1-564          | 1        | 192201709             | 192201709           | EC                 | NONE                    |                |              | 192201709    | 0             |                | 3.27E-16    | 68               | 52                | EC             | 3.27E-16 |          |
| 1-569          | 1        | 193919420             | 193919420           | EC                 | NONE                    |                |              | 193919420    | 0             |                | 2.08E-56    | 86               | 76                | EC             | 2.08E-56 |          |
| 1-575          | 1        | 194933398             | 194933398           | EC                 | NONE                    |                |              | 194933398    | 0             |                | 8.20E-32    | 59               | 57                | EC             | 8.20E-32 |          |
| 1-577          | 1        | 195298102             | 195298102           | EC                 | NONE                    |                |              | 195298102    | 0             |                | 4.11E-41    | 65               | 63                | EC             | 4.11E-41 |          |
| 1-590          | 1        | 197742123             | 197742123           | EC                 | NONE                    |                |              | 197742123    | 0             |                | 1.55E-32    | 59               | 53                | EC             | 1.55E-32 |          |
| 1-593          | 1        | 198623617             | 198623617           | EC                 | NONE                    |                |              | 198623617    | 0             |                | 1.11E-04    | 32               | 26</              |                |          |          |

|       |   |           |           |    |      |           |   |          |    |    |    |          |
|-------|---|-----------|-----------|----|------|-----------|---|----------|----|----|----|----------|
| 1-611 | 1 | 207271598 | 207271598 | EC | NONE | 207271598 | 0 | 1.07E-62 | 92 | 76 | EC | 1.07E-62 |
| 1-635 | 1 | 213063952 | 213063952 | EC | NONE | 213063952 | 0 | 3.32E-40 | 62 | 55 | EC | 3.32E-40 |
| 1-645 | 1 | 217307150 | 217307150 | EC | NONE | 217307150 | 0 | 3.08E-39 | 70 | 59 | EC | 3.08E-39 |
| 1-656 | 1 | 220458702 | 220458702 | EC | NONE | 220458702 | 0 | 8.42E-18 | 52 | 49 | EC | 8.42E-18 |
| 1-675 | 1 | 227518556 | 227518556 | EC | NONE | 227518556 | 0 | 1.24E-37 | 75 | 63 | EC | 1.24E-37 |
| 1-680 | 1 | 229186324 | 229186324 | EC | NONE | 229186324 | 0 | 4.54E-18 | 69 | 52 | EC | 4.54E-18 |
| 1-692 | 1 | 231892404 | 231892404 | EC | NONE | 231892404 | 0 | 6.22E-27 | 44 | 37 | EC | 6.22E-27 |
| 1-709 | 1 | 238829574 | 238829574 | EC | NONE | 238829574 | 0 | 4.70E-32 | 57 | 51 | EC | 4.70E-32 |
| 1-728 | 1 | 251281671 | 251281671 | EC | NONE | 251281671 | 0 | 8.96E-27 | 68 | 60 | EC | 8.96E-27 |
| 1-732 | 1 | 252669982 | 252669982 | EC | NONE | 252669982 | 0 | 3.84E-56 | 69 | 56 | EC | 3.84E-56 |
| 1-746 | 1 | 260623031 | 260623031 | EC | NONE | 260623031 | 0 | 5.45E-33 | 78 | 73 | EC | 5.45E-33 |
| 1-747 | 1 | 260673988 | 260673988 | EC | NONE | 260673988 | 0 | 4.22E-29 | 73 | 67 | EC | 4.22E-29 |
| 1-814 | 1 | 298930722 | 298930722 | EC | NONE | 298930722 | 0 | 1.15E-75 | 91 | 81 | EC | 1.15E-75 |
| 2-11  | 2 | 5942883   | 5942883   | EC | NONE | 5942883   | 0 | 6.05E-29 | 70 | 64 | EC | 6.05E-29 |
| 2-15  | 2 | 9732728   | 9732728   | EC | NONE | 9732728   | 0 | 3.25E-40 | 99 | 88 | EC | 3.25E-40 |
| 2-20  | 2 | 12866338  | 12866338  | EC | NONE | 12866338  | 0 | 1.05E-32 | 71 | 61 | EC | 1.05E-32 |
| 2-22  | 2 | 13459122  | 13459122  | EC | NONE | 13459122  | 0 | 0.00E+00 | 69 | 69 | EC | 0.00E+00 |
| 2-30  | 2 | 16629273  | 16629273  | EC | NONE | 16629273  | 0 | 0.00E+00 | 50 | 50 | EC | 0.00E+00 |
| 2-38  | 2 | 19057039  | 19057039  | EC | NONE | 19057039  | 0 | 1.45E-28 | 47 | 41 | EC | 1.45E-28 |
| 2-48  | 2 | 21815183  | 21815183  | EC | NONE | 21815183  | 0 | 1.14E-52 | 62 | 55 | EC | 1.14E-52 |
| 2-53  | 2 | 23558503  | 23558503  | EC | NONE | 23558503  | 0 | 2.35E-28 | 46 | 46 | EC | 2.35E-28 |
| 2-55  | 2 | 23778862  | 23778862  | EC | NONE | 23778862  | 0 | 2.32E-31 | 57 | 45 | EC | 2.32E-31 |
| 2-68  | 2 | 26882271  | 26882271  | EC | NONE | 26882271  | 0 | 5.26E-54 | 92 | 73 | EC | 5.26E-54 |
| 2-84  | 2 | 32671704  | 32671704  | EC | NONE | 32671704  | 0 | 9.26E-36 | 92 | 89 | EC | 9.26E-36 |
| 2-100 | 2 | 39317994  | 39317994  | EC | NONE | 39317994  | 0 | 1.56E-34 | 70 | 66 | EC | 1.56E-34 |
| 2-114 | 2 | 45653440  | 45653440  | EC | NONE | 45653440  | 0 | 8.93E-18 | 43 | 35 | EC | 8.93E-18 |
| 2-115 | 2 | 45913345  | 45913345  | EC | NONE | 45913345  | 0 | 9.52E-25 | 53 | 47 | EC | 9.52E-25 |
| 2-117 | 2 | 46236332  | 46236332  | EC | NONE | 46236332  | 0 | 2.60E-11 | 43 | 36 | EC | 2.60E-11 |
| 2-139 | 2 | 53452258  | 53452258  | EC | NONE | 53452258  | 0 | 5.03E-07 | 47 | 41 | EC | 5.03E-07 |
| 2-151 | 2 | 61754899  | 61754899  | EC | NONE | 61754899  | 0 | 6.93E-18 | 33 | 32 | EC | 6.93E-18 |
| 2-156 | 2 | 65500805  | 65500805  | EC | NONE | 65500805  | 0 | 3.05E-18 | 39 | 33 | EC | 3.05E-18 |
| 2-161 | 2 | 66811599  | 66811599  | EC | NONE | 66811599  | 0 | 1.84E-46 | 69 | 64 | EC | 1.84E-46 |
| 2-172 | 2 | 68784591  | 68784591  | EC | NONE | 68784591  | 0 | 2.77E-48 | 85 | 72 | EC | 2.77E-48 |
| 2-212 | 2 | 81782628  | 81782628  | EC | NONE | 81782628  | 0 | 4.28E-27 | 39 | 36 | EC | 4.28E-27 |
| 2-223 | 2 | 85426903  | 85426903  | EC | NONE | 85426903  | 0 | 1.74E-06 | 50 | 45 | EC | 1.74E-06 |
| 2-243 | 2 | 94067671  | 94067671  | EC | NONE | 94067671  | 0 | 3.33E-09 | 41 | 37 | EC | 3.33E-09 |
| 2-244 | 2 | 94078172  | 94078172  | EC | NONE | 94078172  | 0 | 3.76E-07 | 43 | 36 | EC | 3.76E-07 |
| 2-245 | 2 | 94089152  | 94089152  | EC | NONE | 94089152  | 0 | 5.48E-06 | 44 | 35 | EC | 5.48E-06 |
| 2-246 | 2 | 94101064  | 94101064  | EC | NONE | 94101064  | 0 | 2.16E-09 | 45 | 40 | EC | 2.16E-09 |
| 2-254 | 2 | 97402689  | 97402689  | EC | NONE | 97402689  | 0 | 4.81E-28 | 52 | 45 | EC | 4.81E-28 |
| 2-256 | 2 | 97647674  | 97647674  | EC | NONE | 97647674  | 0 | 6.49E-26 | 51 | 47 | EC | 6.49E-26 |
| 2-278 | 2 | 103949251 | 103949251 | EC | NONE | 103949251 | 0 | 3.20E-16 | 57 | 55 | EC | 3.20E-16 |
| 2-279 | 2 | 112432539 | 112432539 | EC | NONE | 112432539 | 0 | 9.36E-03 | 10 | 8  | EC | 9.36E-03 |
| 2-280 | 2 | 112616928 | 112616928 | EC | NONE | 112616928 | 0 | 2.21E-19 | 42 | 38 | EC | 2.21E-19 |
| 2-287 | 2 | 197430950 | 197430950 | EC | NONE | 197430950 | 0 | 9.57E-24 | 45 | 43 | EC | 9.57E-24 |
| 2-292 | 2 | 199565541 | 199565541 | EC | NONE | 199565541 | 0 | 1.02E-54 | 96 | 83 | EC | 1.02E-54 |
| 2-311 | 2 | 211185194 | 211185194 | EC | NONE | 211185194 | 0 | 1.03E-49 | 89 | 81 | EC | 1.03E-49 |
| 2-315 | 2 | 211901670 | 211901670 | EC | NONE | 211901670 | 0 | 3.04E-36 | 42 | 36 | EC | 3.04E-36 |
| 2-338 | 2 | 223028093 | 223028093 | EC | NONE | 223028093 | 0 | 1.79E-31 | 65 | 58 | EC | 1.79E-31 |
| 2-342 | 2 | 226627485 | 226627485 | EC | NONE | 226627485 | 0 | 4.95E-13 | 43 | 40 | EC | 4.95E-13 |
| 2-351 | 2 | 230000033 | 230000033 | EC | NONE | 230000033 | 0 | 2.19E-27 | 66 | 57 | EC | 2.19E-27 |
| 2-354 | 2 | 230645953 | 230645953 | EC | NONE | 230645953 | 0 | 1.83E-16 | 44 | 38 | EC | 1.83E-16 |
| 2-357 | 2 | 231611414 | 231611414 | EC | NONE | 231611414 | 0 | 6.61E-18 | 57 | 54 | EC | 6.61E-18 |
| 3-6   | 3 | 3642480   | 3642480   | EC | NONE | 3642480   | 0 | 6.75E-71 | 77 | 71 | EC | 6.75E-71 |
| 3-18  | 3 | 18230717  | 18230717  | EC | NONE | 18230717  | 0 | 6.17E-19 | 56 | 52 | EC | 6.17E-19 |
| 3-28  | 3 | 26675965  | 26675965  | EC | NONE | 26675965  | 0 | 2.56E-25 | 48 | 42 | EC | 2.56E-25 |
| 3-41  | 3 | 30809421  | 30809421  | EC | NONE | 30809421  | 0 | 1.68E-16 | 49 | 43 | EC | 1.68E-16 |
| 3-49  | 3 | 32568623  | 32568623  | EC | NONE | 32568623  | 0 | 4.27E-14 | 38 | 35 | EC | 4.27E-14 |
| 3-52  | 3 | 33270674  | 33270674  | EC | NONE | 33270674  | 0 | 2.84E-54 | 78 | 66 | EC | 2.84E-54 |
| 3-56  | 3 | 34735332  | 34735332  | EC | NONE | 34735332  | 0 | 3.43E-27 | 49 | 48 | EC | 3.43E-27 |
| 3-77  | 3 | 39605886  | 39605886  | EC | NONE | 39605886  | 0 | 1.10E-07 | 32 | 31 | EC | 1.10E-07 |
| 3-97  | 3 | 44439877  | 44439877  | EC | NONE | 44439877  | 0 | 4.39E-11 | 56 | 49 | EC | 4.39E-11 |
| 3-99  | 3 | 44623822  | 44623822  | EC | NONE | 44623822  | 0 | 1.81E-39 | 52 | 46 | EC | 1.81E-39 |
| 3-111 | 3 | 47667586  | 47667586  | EC | NONE | 47667586  | 0 | 2.58E-32 | 52 | 44 | EC | 2.58E-32 |
| 3-122 | 3 | 50928401  | 50928401  | EC | NONE | 50928401  | 0 | 1.07E-33 | 66 | 62 | EC | 1.07E-33 |
| 3-141 | 3 | 56695558  | 56695558  | EC | NONE | 56695558  | 0 | 3.76E-15 | 52 | 44 | EC | 3.76E-15 |
| 3-176 | 3 | 73722464  | 73722464  | EC | NONE | 73722464  | 0 | 4.30E-12 | 22 | 22 | EC | 4.30E-12 |
| 3-181 | 3 | 76097403  | 76097403  | EC | NONE | 76097403  | 0 | 1.03E-09 | 48 | 43 | EC | 1.03E-09 |
| 3-196 | 3 | 79638000  | 79638000  | EC | NONE | 79638000  | 0 | 6.61E-33 | 40 | 33 | EC | 6.61E-33 |
| 3-208 | 3 | 84719991  | 84719991  | EC | NONE | 84719991  | 0 | 7.97E-31 | 38 | 29 | EC | 7.97E-31 |
| 3-216 | 3 | 87732292  | 87732292  | EC | NONE | 87732292  | 0 | 1.08E-18 | 47 | 43 | EC | 1.08E-18 |
| 3-221 | 3 | 90274472  | 90274472  | EC | NONE | 90274472  | 0 | 1.84E-43 | 61 | 55 | EC | 1.84E-43 |
| 3-227 | 3 | 96453118  | 96453118  | EC | NONE | 96453118  | 0 | 6.42E-47 | 73 | 62 | EC | 6.42E-47 |
| 3-238 | 3 | 99520475  | 99520475  | EC | NONE | 99520475  | 0 | 2.26E-44 | 49 | 43 | EC | 2.26E-44 |
| 3-243 | 3 | 101617527 | 101617527 | EC | NONE | 101617527 | 0 | 7.83E-12 | 38 | 36 | EC | 7.83E-12 |
| 3-253 | 3 | 103889768 | 103889768 | EC | NONE | 103889768 | 0 | 1.83E-46 | 73 | 61 | EC | 1.83E-46 |
| 3-254 | 3 | 104037207 | 104037207 | EC | NONE | 104037207 | 0 | 8.01E-40 | 74 | 66 | EC | 8.01E-40 |
| 3-278 | 3 | 114776296 | 114776296 | EC | NONE | 114776296 | 0 | 5.22E-12 | 31 | 29 | EC | 5.22E-12 |
| 3-282 | 3 | 116847048 | 116847048 | EC | NONE | 116847048 | 0 | 1.04E-29 | 54 | 50 | EC | 1.04E-29 |
| 3-285 | 3 | 121143270 | 121143270 | EC | NONE | 121143270 | 0 | 9.46E-10 | 45 | 41 | EC | 9.46E-10 |
| 3-294 | 3 | 125603671 | 125603671 | EC | NONE | 125603671 | 0 | 2.73E-30 | 57 | 51 | EC | 2.73E-30 |
| 3-330 | 3 | 139655969 | 139655969 | EC | NONE | 139655969 | 0 | 1.15E-57 | 88 | 75 | EC | 1.15E-57 |
| 3-338 | 3 | 141580110 | 141580110 | EC | NONE | 141580110 | 0 | 8.31E-45 | 63 | 53 | EC | 8.31E-45 |
| 3-342 | 3 | 143220259 | 143220259 | EC | NONE | 143220259 | 0 | 1.30E-33 | 83 | 72 | EC | 1.30E-33 |
| 3-347 | 3 | 145249189 | 145249189 | EC | NONE | 145249189 | 0 | 1.75E-10 | 28 | 28 | EC | 1.75E-10 |
| 3-359 | 3 | 149997003 | 149997003 | EC | NONE | 149997003 | 0 | 4.00E-50 | 93 | 88 | EC | 4.00E-50 |
| 3-361 | 3 | 150662011 | 150662011 | EC | NONE | 150662011 | 0 | 1.03E-25 | 73 | 68 | EC | 1.03E-25 |
| 3-364 | 3 | 152353159 | 152353159 | EC | NONE | 152353159 | 0 | 2.61E-11 | 44 | 40 | EC | 2.61E-11 |
| 3-365 | 3 | 152361500 | 152361500 | EC | NONE | 152361500 | 0 | 1.13E-12 | 41 | 39 | EC | 1.13E-12 |
| 3-374 | 3 | 160997732 | 160997732 | EC | NONE | 160997732 | 0 | 4.79E-40 | 59 | 55 | EC | 4.79E-40 |
| 3-384 | 3 | 163942360 | 163942360 | EC | NONE | 163942360 | 0 | 1.47E-16 | 51 | 47 | EC | 1.47E-16 |

complex event  
complex event

|       |   |           |           |    |      |           |   |          |    |    |    |          |
|-------|---|-----------|-----------|----|------|-----------|---|----------|----|----|----|----------|
| 3-387 | 3 | 164592034 | 164592034 | EC | NONE | 164592034 | 0 | 5.55E-23 | 66 | 61 | EC | 5.55E-23 |
| 3-393 | 3 | 169025081 | 169025081 | EC | NONE | 169025081 | 0 | 4.67E-48 | 62 | 61 | EC | 4.67E-48 |
| 3-394 | 3 | 172101446 | 172101446 | EC | NONE | 172101446 | 0 | 1.07E-28 | 66 | 61 | EC | 1.07E-28 |
| 3-397 | 3 | 173737760 | 173737760 | EC | NONE | 173737760 | 0 | 1.26E-36 | 87 | 79 | EC | 1.26E-36 |
| 3-400 | 3 | 174381740 | 174381740 | EC | NONE | 174381740 | 0 | 4.41E-07 | 48 | 41 | EC | 4.41E-07 |
| 3-422 | 3 | 184744385 | 184744385 | EC | NONE | 184744385 | 0 | 3.55E-22 | 70 | 64 | EC | 3.55E-22 |
| 3-453 | 3 | 194891809 | 194891809 | EC | NONE | 194891809 | 0 | 4.73E-41 | 63 | 58 | EC | 4.73E-41 |
| 3-481 | 3 | 205737099 | 205737099 | EC | NONE | 205737099 | 0 | 1.03E-44 | 53 | 45 | EC | 1.03E-44 |
| 3-483 | 3 | 206905612 | 206905612 | EC | NONE | 206905612 | 0 | 6.35E-31 | 67 | 56 | EC | 6.35E-31 |
| 3-487 | 3 | 208369108 | 208369108 | EC | NONE | 208369108 | 0 | 2.82E-36 | 76 | 62 | EC | 2.82E-36 |
| 3-488 | 3 | 208381461 | 208381461 | EC | NONE | 208381461 | 0 | 1.07E-33 | 76 | 60 | EC | 1.07E-33 |
| 3-494 | 3 | 210094504 | 210094504 | EC | NONE | 210094504 | 0 | 1.07E-67 | 98 | 81 | EC | 1.07E-67 |
| 3-499 | 3 | 211062825 | 211062825 | EC | NONE | 211062825 | 0 | 1.44E-31 | 83 | 74 | EC | 1.44E-31 |
| 3-515 | 3 | 215617434 | 215617434 | EC | NONE | 215617434 | 0 | 2.50E-52 | 88 | 71 | EC | 2.50E-52 |
| 3-536 | 3 | 222157294 | 222157294 | EC | NONE | 222157294 | 0 | 3.33E-21 | 63 | 54 | EC | 3.33E-21 |
| 3-543 | 3 | 226558072 | 226558072 | EC | NONE | 226558072 | 0 | 2.33E-24 | 62 | 48 | EC | 2.33E-24 |
| 3-551 | 3 | 228593419 | 228593419 | EC | NONE | 228593419 | 0 | 8.79E-20 | 70 | 63 | EC | 8.79E-20 |
| 3-552 | 3 | 228616984 | 228616984 | EC | NONE | 228616984 | 0 | 5.53E-18 | 71 | 62 | EC | 5.53E-18 |
| 3-554 | 3 | 229146757 | 229146757 | EC | NONE | 229146757 | 0 | 2.87E-32 | 82 | 70 | EC | 2.87E-32 |
| 4-7   | 4 | 6166247   | 6166247   | EC | NONE | 6166247   | 0 | 3.56E-40 | 83 | 68 | EC | 3.56E-40 |
| 4-28  | 4 | 10787880  | 10787880  | EC | NONE | 10787880  | 0 | 1.59E-50 | 68 | 58 | EC | 1.59E-50 |
| 4-52  | 4 | 20000842  | 20000842  | EC | NONE | 20000842  | 0 | 8.57E-28 | 73 | 64 | EC | 8.57E-28 |
| 4-53  | 4 | 20026487  | 20026487  | EC | NONE | 20026487  | 0 | 1.61E-27 | 70 | 62 | EC | 1.61E-27 |
| 4-55  | 4 | 23031885  | 23031885  | EC | NONE | 23031885  | 0 | 1.02E-29 | 44 | 42 | EC | 1.02E-29 |
| 4-59  | 4 | 25804353  | 25804353  | EC | NONE | 25804353  | 0 | 2.53E-46 | 68 | 57 | EC | 2.53E-46 |
| 4-79  | 4 | 37535703  | 37535703  | EC | NONE | 37535703  | 0 | 3.32E-21 | 45 | 40 | EC | 3.32E-21 |
| 4-91  | 4 | 41976569  | 41976569  | EC | NONE | 41976569  | 0 | 2.76E-33 | 64 | 57 | EC | 2.76E-33 |
| 4-92  | 4 | 42017137  | 42017137  | EC | NONE | 42017137  | 0 | 6.30E-30 | 62 | 56 | EC | 6.30E-30 |
| 4-93  | 4 | 42120138  | 42120138  | EC | NONE | 42120138  | 0 | 1.21E-46 | 69 | 66 | EC | 1.21E-46 |
| 4-108 | 4 | 48753177  | 48753177  | EC | NONE | 48753177  | 0 | 2.14E-17 | 58 | 50 | EC | 2.14E-17 |
| 4-110 | 4 | 49001633  | 49001633  | EC | NONE | 49001633  | 0 | 3.25E-13 | 51 | 46 | EC | 3.25E-13 |
| 4-114 | 4 | 50826397  | 50826397  | EC | NONE | 50826397  | 0 | 1.99E-09 | 20 | 18 | EC | 1.99E-09 |
| 4-115 | 4 | 50835438  | 50835438  | EC | NONE | 50835438  | 0 | 4.47E-07 | 20 | 16 | EC | 4.47E-07 |
| 4-127 | 4 | 54357516  | 54357516  | EC | NONE | 54357516  | 0 | 9.20E-20 | 51 | 45 | EC | 9.20E-20 |
| 4-131 | 4 | 56711979  | 56711979  | EC | NONE | 56711979  | 0 | 5.91E-32 | 74 | 67 | EC | 5.91E-32 |
| 4-136 | 4 | 60770233  | 60770233  | EC | NONE | 60770233  | 0 | 4.89E-21 | 45 | 30 | EC | 4.89E-21 |
| 4-145 | 4 | 63966218  | 63966218  | EC | NONE | 63966218  | 0 | 1.17E-40 | 45 | 43 | EC | 1.17E-40 |
| 4-158 | 4 | 69270213  | 69270213  | EC | NONE | 69270213  | 0 | 1.96E-25 | 84 | 73 | EC | 1.96E-25 |
| 4-215 | 4 | 86564957  | 86564957  | EC | NONE | 86564957  | 0 | 9.26E-24 | 69 | 59 | EC | 9.26E-24 |
| 4-216 | 4 | 86580235  | 86580235  | EC | NONE | 86580235  | 0 | 1.76E-18 | 69 | 54 | EC | 1.76E-18 |
| 4-249 | 4 | 95882994  | 95882994  | EC | NONE | 95882994  | 0 | 6.45E-08 | 22 | 21 | EC | 6.45E-08 |
| 4-266 | 4 | 101108654 | 101108654 | EC | NONE | 101108654 | 0 | 2.74E-26 | 67 | 47 | EC | 2.74E-26 |
| 4-274 | 4 | 103313621 | 103313621 | EC | NONE | 103313621 | 0 | 3.65E-32 | 67 | 64 | EC | 3.65E-32 |
| 4-280 | 4 | 107780528 | 107780528 | EC | NONE | 107780528 | 0 | 1.42E-31 | 68 | 56 | EC | 1.42E-31 |
| 4-321 | 4 | 123310090 | 123310090 | EC | NONE | 123310090 | 0 | 2.46E-45 | 84 | 71 | EC | 2.46E-45 |
| 4-342 | 4 | 137494123 | 137494123 | EC | NONE | 137494123 | 0 | 2.29E-28 | 36 | 33 | EC | 2.29E-28 |
| 4-373 | 4 | 150214399 | 150214399 | EC | NONE | 150214399 | 0 | 5.56E-49 | 73 | 66 | EC | 5.56E-49 |
| 4-378 | 4 | 153375500 | 153375500 | EC | NONE | 153375500 | 0 | 3.35E-10 | 47 | 41 | EC | 3.35E-10 |
| 4-380 | 4 | 154890408 | 154890408 | EC | NONE | 154890408 | 0 | 1.27E-46 | 83 | 71 | EC | 1.27E-46 |
| 4-381 | 4 | 155271093 | 155271093 | EC | NONE | 155271093 | 0 | 5.08E-10 | 66 | 58 | EC | 5.08E-10 |
| 4-394 | 4 | 158222782 | 158222782 | EC | NONE | 158222782 | 0 | 2.80E-49 | 88 | 73 | EC | 2.80E-49 |
| 4-399 | 4 | 159163091 | 159163091 | EC | NONE | 159163091 | 0 | 1.81E-19 | 40 | 31 | EC | 1.81E-19 |
| 4-402 | 4 | 159671943 | 159671943 | EC | NONE | 159671943 | 0 | 1.95E-28 | 48 | 42 | EC | 1.95E-28 |
| 4-405 | 4 | 160167966 | 160167966 | EC | NONE | 160167966 | 0 | 3.45E-57 | 76 | 59 | EC | 3.45E-57 |
| 4-410 | 4 | 161202367 | 161202367 | EC | NONE | 161202367 | 0 | 4.08E-22 | 33 | 26 | EC | 4.08E-22 |
| 4-427 | 4 | 164979937 | 164979937 | EC | NONE | 164979937 | 0 | 3.23E-07 | 36 | 33 | EC | 3.23E-07 |
| 4-440 | 4 | 168332802 | 168332802 | EC | NONE | 168332802 | 0 | 1.22E-27 | 70 | 62 | EC | 1.22E-27 |
| 4-441 | 4 | 168617100 | 168617100 | EC | NONE | 168617100 | 0 | 1.06E-50 | 90 | 79 | EC | 1.06E-50 |
| 4-445 | 4 | 169527087 | 169527087 | EC | NONE | 169527087 | 0 | 5.13E-49 | 65 | 58 | EC | 5.13E-49 |
| 4-451 | 4 | 172709671 | 172709671 | EC | NONE | 172709671 | 0 | 7.53E-41 | 75 | 72 | EC | 7.53E-41 |
| 4-456 | 4 | 173915123 | 173915123 | EC | NONE | 173915123 | 0 | 4.08E-31 | 80 | 74 | EC | 4.08E-31 |
| 4-464 | 4 | 175137770 | 175137770 | EC | NONE | 175137770 | 0 | 3.78E-54 | 72 | 66 | EC | 3.78E-54 |
| 4-466 | 4 | 175764828 | 175764828 | EC | NONE | 175764828 | 0 | 6.79E-48 | 73 | 63 | EC | 6.79E-48 |
| 4-478 | 4 | 183786352 | 183786352 | EC | NONE | 183786352 | 0 | 2.30E-54 | 79 | 64 | EC | 2.30E-54 |
| 4-482 | 4 | 186617719 | 186617719 | EC | NONE | 186617719 | 0 | 1.68E-17 | 55 | 45 | EC | 1.68E-17 |
| 4-502 | 4 | 197908499 | 197908499 | EC | NONE | 197908499 | 0 | 7.96E-44 | 86 | 73 | EC | 7.96E-44 |
| 4-505 | 4 | 198344156 | 198344156 | EC | NONE | 198344156 | 0 | 1.02E-29 | 82 | 72 | EC | 1.02E-29 |
| 4-520 | 4 | 202772420 | 202772420 | EC | NONE | 202772420 | 0 | 2.08E-06 | 40 | 39 | EC | 2.08E-06 |
| 4-532 | 4 | 205290951 | 205290951 | EC | NONE | 205290951 | 0 | 1.14E-31 | 77 | 68 | EC | 1.14E-31 |
| 4-575 | 4 | 216798370 | 216798370 | EC | NONE | 216798370 | 0 | 1.61E-48 | 65 | 58 | EC | 1.61E-48 |
| 4-584 | 4 | 220671337 | 220671337 | EC | NONE | 220671337 | 0 | 3.40E-53 | 70 | 59 | EC | 3.40E-53 |
| 4-598 | 4 | 223580101 | 223580101 | EC | NONE | 223580101 | 0 | 3.66E-21 | 63 | 51 | EC | 3.66E-21 |
| 4-599 | 4 | 223597902 | 223597902 | EC | NONE | 223597902 | 0 | 1.24E-30 | 64 | 59 | EC | 1.24E-30 |
| 4-601 | 4 | 223745425 | 223745425 | EC | NONE | 223745425 | 0 | 4.30E-24 | 55 | 49 | EC | 4.30E-24 |
| 4-606 | 4 | 224916816 | 224916816 | EC | NONE | 224916816 | 0 | 4.97E-41 | 56 | 49 | EC | 4.97E-41 |
| 4-607 | 4 | 225089678 | 225089678 | EC | NONE | 225089678 | 0 | 8.40E-21 | 63 | 52 | EC | 8.40E-21 |
| 4-627 | 4 | 231003124 | 231003124 | EC | NONE | 231003124 | 0 | 1.36E-20 | 44 | 37 | EC | 1.36E-20 |
| 4-642 | 4 | 233989209 | 233989209 | EC | NONE | 233989209 | 0 | 3.36E-54 | 85 | 73 | EC | 3.36E-54 |
| 4-656 | 4 | 238116082 | 238116082 | EC | NONE | 238116082 | 0 | 1.95E-28 | 71 | 64 | EC | 1.95E-28 |
| 5-4   | 5 | 1563261   | 1563261   | EC | NONE | 1563261   | 0 | 6.92E-51 | 77 | 66 | EC | 6.92E-51 |
| 5-6   | 5 | 1810344   | 1810344   | EC | NONE | 1810344   | 0 | 1.54E-22 | 73 | 65 | EC | 1.54E-22 |
| 5-16  | 5 | 4187055   | 4187055   | EC | NONE | 4187055   | 0 | 5.46E-48 | 56 | 50 | EC | 5.46E-48 |
| 5-40  | 5 | 10178393  | 10178393  | EC | NONE | 10178393  | 0 | 7.80E-19 | 78 | 66 | EC | 7.80E-19 |
| 5-63  | 5 | 30720733  | 30720733  | EC | NONE | 30720733  | 0 | 2.03E-50 | 57 | 49 | EC | 2.03E-50 |
| 5-82  | 5 | 35894491  | 35894491  | EC | NONE | 35894491  | 0 | 3.65E-42 | 81 | 66 | EC | 3.65E-42 |
| 5-88  | 5 | 38085996  | 38085996  | EC | NONE | 38085996  | 0 | 6.43E-21 | 59 | 52 | EC | 6.43E-21 |
| 5-94  | 5 | 40040383  | 40040383  | EC | NONE | 40040383  | 0 | 3.90E-07 | 42 | 33 | EC | 3.90E-07 |
| 5-103 | 5 | 43682422  | 43682422  | EC | NONE | 43682422  | 0 | 4.60E-50 | 87 | 66 | EC | 4.60E-50 |
| 5-110 | 5 | 47895520  | 47895520  | EC | NONE | 47895520  | 0 | 5.49E-62 | 79 | 72 | EC | 5.49E-62 |
| 5-133 | 5 | 55066762  | 55066762  | EC | NONE | 55066762  | 0 | 2.01E-36 | 55 | 46 | EC | 2.01E-36 |
| 5-145 | 5 | 57128086  | 57128086  | EC | NONE | 57128086  | 0 | 8.59E-47 | 83 | 74 | EC | 8.59E-47 |

|       |   |           |           |    |      |           |   |          |    |    |    |          |
|-------|---|-----------|-----------|----|------|-----------|---|----------|----|----|----|----------|
| 5-153 | 5 | 60185254  | 60185254  | EC | NONE | 60185254  | 0 | 2.68E-50 | 87 | 77 | EC | 2.68E-50 |
| 5-154 | 5 | 61041693  | 61041693  | EC | NONE | 61041693  | 0 | 1.53E-39 | 68 | 62 | EC | 1.53E-39 |
| 5-155 | 5 | 61153740  | 61153740  | EC | NONE | 61153740  | 0 | 4.48E-26 | 64 | 51 | EC | 4.48E-26 |
| 5-159 | 5 | 65393104  | 65393104  | EC | NONE | 65393104  | 0 | 4.40E-35 | 57 | 47 | EC | 4.40E-35 |
| 5-161 | 5 | 65582532  | 65582532  | EC | NONE | 65582532  | 0 | 1.84E-41 | 69 | 50 | EC | 1.84E-41 |
| 5-162 | 5 | 66857562  | 66857562  | EC | NONE | 66857562  | 0 | 3.54E-09 | 39 | 37 | EC | 3.54E-09 |
| 5-163 | 5 | 66864092  | 66864092  | EC | NONE | 66864092  | 0 | 4.69E-11 | 46 | 44 | EC | 4.69E-11 |
| 5-185 | 5 | 74045514  | 74045514  | EC | NONE | 74045514  | 0 | 1.37E-36 | 52 | 51 | EC | 1.37E-36 |
| 5-195 | 5 | 76012875  | 76012875  | EC | NONE | 76012875  | 0 | 2.34E-24 | 58 | 50 | EC | 2.34E-24 |
| 5-202 | 5 | 77944928  | 77944928  | EC | NONE | 77944928  | 0 | 1.30E-15 | 39 | 36 | EC | 1.30E-15 |
| 5-209 | 5 | 83427349  | 83427349  | EC | NONE | 83427349  | 0 | 2.16E-46 | 92 | 83 | EC | 2.16E-46 |
| 5-228 | 5 | 88316197  | 88316197  | EC | NONE | 88316197  | 0 | 1.08E-25 | 56 | 51 | EC | 1.08E-25 |
| 5-237 | 5 | 91175330  | 91175330  | EC | NONE | 91175330  | 0 | 3.79E-24 | 86 | 77 | EC | 3.79E-24 |
| 5-239 | 5 | 91780997  | 91780997  | EC | NONE | 91780997  | 0 | 3.43E-15 | 53 | 48 | EC | 3.43E-15 |
| 5-247 | 5 | 94706665  | 94706665  | EC | NONE | 94706665  | 0 | 1.57E-27 | 50 | 46 | EC | 1.57E-27 |
| 5-305 | 5 | 118785730 | 118785730 | EC | NONE | 118785730 | 0 | 1.10E-39 | 94 | 81 | EC | 1.10E-39 |
| 5-308 | 5 | 120270837 | 120270837 | EC | NONE | 120270837 | 0 | 1.48E-26 | 57 | 55 | EC | 1.48E-26 |
| 5-329 | 5 | 125245337 | 125245337 | EC | NONE | 125245337 | 0 | 2.90E-40 | 42 | 38 | EC | 2.90E-40 |
| 5-353 | 5 | 134309845 | 134309845 | EC | NONE | 134309845 | 0 | 1.13E-32 | 47 | 36 | EC | 1.13E-32 |
| 5-362 | 5 | 136279686 | 136279686 | EC | NONE | 136279686 | 0 | 8.37E-15 | 69 | 53 | EC | 8.37E-15 |
| 5-391 | 5 | 145140163 | 145140163 | EC | NONE | 145140163 | 0 | 2.42E-36 | 71 | 61 | EC | 2.42E-36 |
| 5-437 | 5 | 168621020 | 168621020 | EC | NONE | 168621020 | 0 | 2.08E-12 | 44 | 39 | EC | 2.08E-12 |
| 5-444 | 5 | 171041132 | 171041132 | EC | NONE | 171041132 | 0 | 1.34E-24 | 53 | 49 | EC | 1.34E-24 |
| 5-456 | 5 | 181642617 | 181642617 | EC | NONE | 181642617 | 0 | 3.11E-15 | 44 | 40 | EC | 3.11E-15 |
| 5-460 | 5 | 184903853 | 184903853 | EC | NONE | 184903853 | 0 | 7.69E-24 | 66 | 57 | EC | 7.69E-24 |
| 5-461 | 5 | 185474747 | 185474747 | EC | NONE | 185474747 | 0 | 7.03E-48 | 51 | 42 | EC | 7.03E-48 |
| 5-479 | 5 | 195826960 | 195826960 | EC | NONE | 195826960 | 0 | 1.75E-23 | 62 | 53 | EC | 1.75E-23 |
| 5-488 | 5 | 198752829 | 198752829 | EC | NONE | 198752829 | 0 | 1.64E-19 | 54 | 44 | EC | 1.64E-19 |
| 5-490 | 5 | 200127999 | 200127999 | EC | NONE | 200127999 | 0 | 2.34E-12 | 45 | 41 | EC | 2.34E-12 |
| 5-495 | 5 | 212311286 | 212311286 | EC | NONE | 212311286 | 0 | 1.19E-56 | 58 | 48 | EC | 1.19E-56 |
| 5-506 | 5 | 215746063 | 215746063 | EC | NONE | 215746063 | 0 | 8.76E-19 | 47 | 42 | EC | 8.76E-19 |
| 6-1   | 6 | 612219    | 612219    | EC | NONE | 612219    | 0 | 3.14E-47 | 51 | 49 | EC | 3.14E-47 |
| 6-9   | 6 | 11855977  | 11855977  | EC | NONE | 11855977  | 0 | 1.07E-30 | 63 | 56 | EC | 1.07E-30 |
| 6-34  | 6 | 33228488  | 33228488  | EC | NONE | 33228488  | 0 | 4.82E-18 | 59 | 54 | EC | 4.82E-18 |
| 6-37  | 6 | 33769773  | 33769773  | EC | NONE | 33769773  | 0 | 5.36E-22 | 79 | 69 | EC | 5.36E-22 |
| 6-48  | 6 | 37006631  | 37006631  | EC | NONE | 37006631  | 0 | 1.77E-14 | 41 | 33 | EC | 1.77E-14 |
| 6-72  | 6 | 47484369  | 47484369  | EC | NONE | 47484369  | 0 | 2.48E-22 | 48 | 46 | EC | 2.48E-22 |
| 6-78  | 6 | 52108872  | 52108872  | EC | NONE | 52108872  | 0 | 1.86E-24 | 50 | 44 | EC | 1.86E-24 |
| 6-82  | 6 | 52992674  | 52992674  | EC | NONE | 52992674  | 0 | 4.91E-25 | 66 | 53 | EC | 4.91E-25 |
| 6-90  | 6 | 54885352  | 54885352  | EC | NONE | 54885352  | 0 | 1.25E-57 | 71 | 68 | EC | 1.25E-57 |
| 6-96  | 6 | 56403379  | 56403379  | EC | NONE | 56403379  | 0 | 2.46E-13 | 44 | 40 | EC | 2.46E-13 |
| 6-97  | 6 | 56419040  | 56419040  | EC | NONE | 56419040  | 0 | 1.05E-16 | 46 | 44 | EC | 1.05E-16 |
| 6-119 | 6 | 64775797  | 64775797  | EC | NONE | 64775797  | 0 | 6.15E-71 | 97 | 82 | EC | 6.15E-71 |
| 6-123 | 6 | 65406695  | 65406695  | EC | NONE | 65406695  | 0 | 3.72E-36 | 64 | 58 | EC | 3.72E-36 |
| 6-134 | 6 | 67884306  | 67884306  | EC | NONE | 67884306  | 0 | 2.19E-15 | 24 | 24 | EC | 2.19E-15 |
| 6-170 | 6 | 92667234  | 92667234  | EC | NONE | 92667234  | 0 | 4.09E-18 | 59 | 51 | EC | 4.09E-18 |
| 7-10  | 7 | 7236176   | 7236176   | EC | NONE | 7236176   | 0 | 2.71E-42 | 68 | 62 | EC | 2.71E-42 |
| 7-17  | 7 | 8690206   | 8690206   | EC | NONE | 8690206   | 0 | 3.75E-71 | 78 | 72 | EC | 3.75E-71 |
| 7-22  | 7 | 9967546   | 9967546   | EC | NONE | 9967546   | 0 | 1.61E-56 | 90 | 81 | EC | 1.61E-56 |
| 7-25  | 7 | 11491548  | 11491548  | EC | NONE | 11491548  | 0 | 6.46E-37 | 75 | 64 | EC | 6.46E-37 |
| 7-38  | 7 | 21521735  | 21521735  | EC | NONE | 21521735  | 0 | 9.75E-33 | 62 | 53 | EC | 9.75E-33 |
| 7-41  | 7 | 23420007  | 23420007  | EC | NONE | 23420007  | 0 | 4.53E-64 | 75 | 64 | EC | 4.53E-64 |
| 7-47  | 7 | 29521426  | 29521426  | EC | NONE | 29521426  | 0 | 9.44E-22 | 47 | 46 | EC | 9.44E-22 |
| 7-48  | 7 | 29861751  | 29861751  | EC | NONE | 29861751  | 0 | 7.68E-45 | 55 | 49 | EC | 7.68E-45 |
| 7-51  | 7 | 34356562  | 34356562  | EC | NONE | 34356562  | 0 | 3.78E-28 | 39 | 36 | EC | 3.78E-28 |
| 7-54  | 7 | 35666044  | 35666044  | EC | NONE | 35666044  | 0 | 1.80E-21 | 28 | 21 | EC | 1.80E-21 |
| 7-55  | 7 | 35803580  | 35803580  | EC | NONE | 35803580  | 0 | 2.03E-05 | 25 | 21 | EC | 2.03E-05 |
| 7-71  | 7 | 40609165  | 40609165  | EC | NONE | 40609165  | 0 | 4.34E-43 | 68 | 63 | EC | 4.34E-43 |
| 7-92  | 7 | 48060764  | 48060764  | EC | NONE | 48060764  | 0 | 4.00E-40 | 73 | 65 | EC | 4.00E-40 |
| 7-106 | 7 | 52297974  | 52297974  | EC | NONE | 52297974  | 0 | 1.07E-50 | 54 | 49 | EC | 1.07E-50 |
| 7-118 | 7 | 59960204  | 59960204  | EC | NONE | 59960204  | 0 | 9.57E-41 | 47 | 39 | EC | 9.57E-41 |
| 7-119 | 7 | 60252161  | 60252161  | EC | NONE | 60252161  | 0 | 5.58E-06 | 26 | 24 | EC | 5.58E-06 |
| 7-156 | 7 | 72265926  | 72265926  | EC | NONE | 72265926  | 0 | 8.25E-23 | 48 | 46 | EC | 8.25E-23 |
| 7-168 | 7 | 76613307  | 76613307  | EC | NONE | 76613307  | 0 | 3.13E-27 | 62 | 55 | EC | 3.13E-27 |
| 7-182 | 7 | 81347288  | 81347288  | EC | NONE | 81347288  | 0 | 1.79E-24 | 53 | 48 | EC | 1.79E-24 |
| 7-190 | 7 | 86026528  | 86026528  | EC | NONE | 86026528  | 0 | 1.19E-31 | 56 | 55 | EC | 1.19E-31 |
| 7-196 | 7 | 90241798  | 90241798  | EC | NONE | 90241798  | 0 | 1.23E-16 | 32 | 29 | EC | 1.23E-16 |
| 7-217 | 7 | 98378089  | 98378089  | EC | NONE | 98378089  | 0 | 1.93E-33 | 84 | 78 | EC | 1.93E-33 |
| 7-238 | 7 | 107335003 | 107335003 | EC | NONE | 107335003 | 0 | 4.35E-02 | 28 | 25 | EC | 4.35E-02 |
| 7-245 | 7 | 113452257 | 113452257 | EC | NONE | 113452257 | 0 | 1.91E-16 | 62 | 59 | EC | 1.91E-16 |
| 7-247 | 7 | 113651530 | 113651530 | EC | NONE | 113651530 | 0 | 3.36E-34 | 69 | 62 | EC | 3.36E-34 |
| 7-255 | 7 | 117234827 | 117234827 | EC | NONE | 117234827 | 0 | 3.43E-50 | 89 | 81 | EC | 3.43E-50 |
| 7-258 | 7 | 119050953 | 119050953 | EC | NONE | 119050953 | 0 | 1.38E-06 | 25 | 23 | EC | 1.38E-06 |
| 7-261 | 7 | 120321929 | 120321929 | EC | NONE | 120321929 | 0 | 3.39E-20 | 60 | 46 | EC | 3.39E-20 |
| 7-319 | 7 | 170886511 | 170886511 | EC | NONE | 170886511 | 0 | 2.99E-53 | 87 | 83 | EC | 2.99E-53 |
| 8-6   | 8 | 5099157   | 5099157   | EC | NONE | 5099157   | 0 | 1.23E-38 | 71 | 63 | EC | 1.23E-38 |
| 8-13  | 8 | 8113366   | 8113366   | EC | NONE | 8113366   | 0 | 9.74E-63 | 97 | 81 | EC | 9.74E-63 |
| 8-14  | 8 | 8293620   | 8293620   | EC | NONE | 8293620   | 0 | 4.43E-41 | 86 | 58 | EC | 4.43E-41 |
| 8-18  | 8 | 8960553   | 8960553   | EC | NONE | 8960553   | 0 | 6.94E-44 | 83 | 75 | EC | 6.94E-44 |
| 8-29  | 8 | 11611086  | 11611086  | EC | NONE | 11611086  | 0 | 1.69E-64 | 97 | 88 | EC | 1.69E-64 |
| 8-34  | 8 | 12222881  | 12222881  | EC | NONE | 12222881  | 0 | 1.36E-35 | 90 | 68 | EC | 1.36E-35 |
| 8-35  | 8 | 12232550  | 12232550  | EC | NONE | 12232550  | 0 | 3.69E-50 | 90 | 79 | EC | 3.69E-50 |
| 8-41  | 8 | 13953276  | 13953276  | EC | NONE | 13953276  | 0 | 7.17E-30 | 42 | 35 | EC | 7.17E-30 |
| 8-54  | 8 | 18406417  | 18406417  | EC | NONE | 18406417  | 0 | 7.36E-21 | 60 | 52 | EC | 7.36E-21 |
| 8-60  | 8 | 20400359  | 20400359  | EC | NONE | 20400359  | 0 | 4.52E-47 | 59 | 47 | EC | 4.52E-47 |
| 8-63  | 8 | 20931846  | 20931846  | EC | NONE | 20931846  | 0 | 1.30E-12 | 74 | 48 | EC | 1.30E-12 |
| 8-68  | 8 | 23675042  | 23675042  | EC | NONE | 23675042  | 0 | 1.74E-04 | 31 | 25 | EC | 1.74E-04 |
| 8-69  | 8 | 23737639  | 23737639  | EC | NONE | 23737639  | 0 | 1.05E-07 | 34 | 31 | EC | 1.05E-07 |
| 8-70  | 8 | 23964105  | 23964105  | EC | NONE | 23964105  | 0 | 3.19E-21 | 44 | 41 | EC | 3.19E-21 |
| 8-71  | 8 | 24019203  | 24019203  | EC | NONE | 24019203  | 0 | 8.36E-27 | 49 | 36 | EC | 8.36E-27 |
| 8-75  | 8 | 24889271  | 24889271  | EC | NONE | 24889271  | 0 | 5.72E-07 | 37 | 35 | EC | 5.72E-07 |

|        |    |           |           |    |      |           |   |          |     |     |    |          |
|--------|----|-----------|-----------|----|------|-----------|---|----------|-----|-----|----|----------|
| 8-81   | 8  | 26470835  | 26470835  | EC | NONE | 26470835  | 0 | 3.78E-11 | 12  | 10  | EC | 3.78E-11 |
| 8-85   | 8  | 27052669  | 27052669  | EC | NONE | 27052669  | 0 | 2.48E-37 | 70  | 63  | EC | 2.48E-37 |
| 8-86   | 8  | 27074372  | 27074372  | EC | NONE | 27074372  | 0 | 1.71E-28 | 69  | 56  | EC | 1.71E-28 |
| 8-95   | 8  | 29755327  | 29755327  | EC | NONE | 29755327  | 0 | 5.39E-09 | 28  | 26  | EC | 5.39E-09 |
| 8-100  | 8  | 33154397  | 33154397  | EC | NONE | 33154397  | 0 | 6.69E-25 | 62  | 56  | EC | 6.69E-25 |
| 8-108  | 8  | 35412638  | 35412638  | EC | NONE | 35412638  | 0 | 2.12E-10 | 48  | 42  | EC | 2.12E-10 |
| 8-112  | 8  | 37404916  | 37404916  | EC | NONE | 37404916  | 0 | 1.81E-16 | 64  | 51  | EC | 1.81E-16 |
| 8-118  | 8  | 38656121  | 38656121  | EC | NONE | 38656121  | 0 | 1.71E-18 | 33  | 33  | EC | 1.71E-18 |
| 8-152  | 8  | 53326887  | 53326887  | EC | NONE | 53326887  | 0 | 2.54E-31 | 53  | 48  | EC | 2.54E-31 |
| 8-163  | 8  | 55786942  | 55786942  | EC | NONE | 55786942  | 0 | 5.77E-22 | 63  | 49  | EC | 5.77E-22 |
| 8-170  | 8  | 60685862  | 60685862  | EC | NONE | 60685862  | 0 | 1.71E-42 | 64  | 58  | EC | 1.71E-42 |
| 8-171  | 8  | 60696889  | 60696889  | EC | NONE | 60696889  | 0 | 2.04E-35 | 63  | 53  | EC | 2.04E-35 |
| 8-178  | 8  | 63921952  | 63921952  | EC | NONE | 63921952  | 0 | 1.85E-41 | 68  | 51  | EC | 1.85E-41 |
| 8-185  | 8  | 64878125  | 64878125  | EC | NONE | 64878125  | 0 | 1.76E-50 | 71  | 60  | EC | 1.76E-50 |
| 8-191  | 8  | 68499391  | 68499391  | EC | NONE | 68499391  | 0 | 7.25E-48 | 73  | 65  | EC | 7.25E-48 |
| 8-195  | 8  | 69596916  | 69596916  | EC | NONE | 69596916  | 0 | 6.13E-12 | 51  | 40  | EC | 6.13E-12 |
| 8-201  | 8  | 71366941  | 71366941  | EC | NONE | 71366941  | 0 | 2.62E-31 | 76  | 65  | EC | 2.62E-31 |
| 8-216  | 8  | 76222078  | 76222078  | EC | NONE | 76222078  | 0 | 4.30E-23 | 72  | 58  | EC | 4.30E-23 |
| 8-229  | 8  | 80135049  | 80135049  | EC | NONE | 80135049  | 0 | 2.03E-34 | 47  | 40  | EC | 2.03E-34 |
| 8-239  | 8  | 85893249  | 85893249  | EC | NONE | 85893249  | 0 | 2.78E-29 | 53  | 52  | EC | 2.78E-29 |
| 8-248  | 8  | 92757916  | 92757916  | EC | NONE | 92757916  | 0 | 8.10E-16 | 61  | 58  | EC | 8.10E-16 |
| 8-256  | 8  | 100184065 | 100184065 | EC | NONE | 100184065 | 0 | 4.26E-18 | 72  | 69  | EC | 4.26E-18 |
| 8-259  | 8  | 107029258 | 107029258 | EC | NONE | 107029258 | 0 | 8.76E-20 | 73  | 63  | EC | 8.76E-20 |
| 8-268  | 8  | 113108262 | 113108262 | EC | NONE | 113108262 | 0 | 1.54E-40 | 89  | 81  | EC | 1.54E-40 |
| 8-269  | 8  | 113268429 | 113268429 | EC | NONE | 113268429 | 0 | 9.07E-22 | 64  | 57  | EC | 9.07E-22 |
| 8-276  | 8  | 118470548 | 118470548 | EC | NONE | 118470548 | 0 | 2.88E-43 | 84  | 69  | EC | 2.88E-43 |
| 8-285  | 8  | 124514260 | 124514260 | EC | NONE | 124514260 | 0 | 2.72E-13 | 43  | 40  | EC | 2.72E-13 |
| 8-288  | 8  | 127705692 | 127705692 | EC | NONE | 127705692 | 0 | 1.91E-23 | 63  | 48  | EC | 1.91E-23 |
| 8-299  | 8  | 129727118 | 129727118 | EC | NONE | 129727118 | 0 | 9.18E-41 | 62  | 54  | EC | 9.18E-41 |
| 8-309  | 8  | 133016023 | 133016023 | EC | NONE | 133016023 | 0 | 9.52E-21 | 67  | 58  | EC | 9.52E-21 |
| 8-314  | 8  | 135198945 | 135198945 | EC | NONE | 135198945 | 0 | 2.38E-23 | 70  | 60  | EC | 2.38E-23 |
| 8-319  | 8  | 136240163 | 136240163 | EC | NONE | 136240163 | 0 | 2.15E-29 | 64  | 49  | EC | 2.15E-29 |
| 8-320  | 8  | 136376649 | 136376649 | EC | NONE | 136376649 | 0 | 4.00E-14 | 61  | 55  | EC | 4.00E-14 |
| 8-332  | 8  | 145530078 | 145530078 | EC | NONE | 145530078 | 0 | 3.67E-09 | 59  | 43  | EC | 3.67E-09 |
| 8-333  | 8  | 145578189 | 145578189 | EC | NONE | 145578189 | 0 | 8.20E-18 | 58  | 52  | EC | 8.20E-18 |
| 8-336  | 8  | 148517301 | 148517301 | EC | NONE | 148517301 | 0 | 2.24E-57 | 94  | 73  | EC | 2.24E-57 |
| 8-357  | 8  | 159940405 | 159940405 | EC | NONE | 159940405 | 0 | 6.19E-24 | 94  | 83  | EC | 6.19E-24 |
| 8-362  | 8  | 161125465 | 161125465 | EC | NONE | 161125465 | 0 | 7.86E-24 | 70  | 61  | EC | 7.86E-24 |
| 8-363  | 8  | 161387714 | 161387714 | EC | NONE | 161387714 | 0 | 1.50E-23 | 58  | 51  | EC | 1.50E-23 |
| 8-370  | 8  | 165604112 | 165604112 | EC | NONE | 165604112 | 0 | 1.24E-21 | 71  | 64  | EC | 1.24E-21 |
| 8-371  | 8  | 170307629 | 170307629 | EC | NONE | 170307629 | 0 | 3.30E-44 | 84  | 71  | EC | 3.30E-44 |
| 8-373  | 8  | 170660448 | 170660448 | EC | NONE | 170660448 | 0 | 1.57E-86 | 102 | 85  | EC | 1.57E-86 |
| 8-376  | 8  | 171175275 | 171175275 | EC | NONE | 171175275 | 0 | 3.68E-22 | 62  | 55  | EC | 3.68E-22 |
| 9-2    | 9  | 1663103   | 1663103   | EC | NONE | 1663103   | 0 | 2.54E-20 | 72  | 61  | EC | 2.54E-20 |
| 9-4    | 9  | 4546804   | 4546804   | EC | NONE | 4546804   | 0 | 5.87E-10 | 41  | 35  | EC | 5.87E-10 |
| 9-11   | 9  | 6317305   | 6317305   | EC | NONE | 6317305   | 0 | 5.36E-11 | 32  | 30  | EC | 5.36E-11 |
| 9-12   | 9  | 8630361   | 8630361   | EC | NONE | 8630361   | 0 | 4.13E-21 | 54  | 49  | EC | 4.13E-21 |
| 9-20   | 9  | 18876562  | 18876562  | EC | NONE | 18876562  | 0 | 5.06E-50 | 69  | 58  | EC | 5.06E-50 |
| 9-21   | 9  | 18962286  | 18962286  | EC | NONE | 18962286  | 0 | 4.73E-21 | 68  | 60  | EC | 4.73E-21 |
| 9-22   | 9  | 19006698  | 19006698  | EC | NONE | 19006698  | 0 | 9.14E-21 | 70  | 61  | EC | 9.14E-21 |
| 9-25   | 9  | 21316708  | 21316708  | EC | NONE | 21316708  | 0 | 2.84E-56 | 88  | 67  | EC | 2.84E-56 |
| 9-31   | 9  | 22090754  | 22090754  | EC | NONE | 22090754  | 0 | 1.61E-35 | 73  | 63  | EC | 1.61E-35 |
| 9-66   | 9  | 40798134  | 40798134  | EC | NONE | 40798134  | 0 | 4.48E-28 | 56  | 44  | EC | 4.48E-28 |
| 9-86   | 9  | 49156220  | 49156220  | EC | NONE | 49156220  | 0 | 5.41E-50 | 84  | 77  | EC | 5.41E-50 |
| 9-87   | 9  | 49600781  | 49600781  | EC | NONE | 49600781  | 0 | 1.64E-18 | 27  | 21  | EC | 1.64E-18 |
| 9-102  | 9  | 55928556  | 55928556  | EC | NONE | 55928556  | 0 | 1.36E-04 | 50  | 43  | EC | 1.36E-04 |
| 9-106  | 9  | 57389087  | 57389087  | EC | NONE | 57389087  | 0 | 1.20E-02 | 17  | 15  | EC | 1.20E-02 |
| 9-107  | 9  | 58397155  | 58397155  | EC | NONE | 58397155  | 0 | 5.40E-06 | 42  | 33  | EC | 5.40E-06 |
| 9-113  | 9  | 60193974  | 60193974  | EC | NONE | 60193974  | 0 | 1.48E-22 | 46  | 45  | EC | 1.48E-22 |
| 9-126  | 9  | 67016585  | 67016585  | EC | NONE | 67016585  | 0 | 1.26E-57 | 108 | 100 | EC | 1.26E-57 |
| 9-132  | 9  | 68143553  | 68143553  | EC | NONE | 68143553  | 0 | 2.08E-13 | 37  | 33  | EC | 2.08E-13 |
| 9-134  | 9  | 69605117  | 69605117  | EC | NONE | 69605117  | 0 | 2.49E-27 | 43  | 38  | EC | 2.49E-27 |
| 9-147  | 9  | 72667866  | 72667866  | EC | NONE | 72667866  | 0 | 2.57E-51 | 58  | 52  | EC | 2.57E-51 |
| 9-149  | 9  | 73001882  | 73001882  | EC | NONE | 73001882  | 0 | 8.19E-18 | 72  | 58  | EC | 8.19E-18 |
| 9-157  | 9  | 76201746  | 76201746  | EC | NONE | 76201746  | 0 | 5.27E-22 | 52  | 49  | EC | 5.27E-22 |
| 9-166  | 9  | 80108185  | 80108185  | EC | NONE | 80108185  | 0 | 1.45E-53 | 96  | 88  | EC | 1.45E-53 |
| 9-178  | 9  | 84320248  | 84320248  | EC | NONE | 84320248  | 0 | 5.24E-16 | 68  | 61  | EC | 5.24E-16 |
| 9-227  | 9  | 96498976  | 96498976  | EC | NONE | 96498976  | 0 | 1.18E-41 | 79  | 65  | EC | 1.18E-41 |
| 9-231  | 9  | 97389555  | 97389555  | EC | NONE | 97389555  | 0 | 4.29E-34 | 55  | 41  | EC | 4.29E-34 |
| 9-234  | 9  | 97789226  | 97789226  | EC | NONE | 97789226  | 0 | 1.09E-18 | 42  | 39  | EC | 1.09E-18 |
| 9-240  | 9  | 98652096  | 98652096  | EC | NONE | 98652096  | 0 | 9.10E-25 | 76  | 57  | EC | 9.10E-25 |
| 9-250  | 9  | 106397647 | 106397647 | EC | NONE | 106397647 | 0 | 1.52E-09 | 52  | 44  | EC | 1.52E-09 |
| 9-254  | 9  | 112441796 | 112441796 | EC | NONE | 112441796 | 0 | 4.54E-15 | 52  | 44  | EC | 4.54E-15 |
| 9-256  | 9  | 113131053 | 113131053 | EC | NONE | 113131053 | 0 | 1.06E-33 | 83  | 76  | EC | 1.06E-33 |
| 9-261  | 9  | 113960676 | 113960676 | EC | NONE | 113960676 | 0 | 1.80E-21 | 71  | 67  | EC | 1.80E-21 |
| 9-264  | 9  | 114590379 | 114590379 | EC | NONE | 114590379 | 0 | 2.87E-30 | 52  | 46  | EC | 2.87E-30 |
| 9-267  | 9  | 116106577 | 116106577 | EC | NONE | 116106577 | 0 | 1.91E-49 | 69  | 59  | EC | 1.91E-49 |
| 9-268  | 9  | 116247191 | 116247191 | EC | NONE | 116247191 | 0 | 2.43E-20 | 54  | 49  | EC | 2.43E-20 |
| 9-277  | 9  | 123724973 | 123724973 | EC | NONE | 123724973 | 0 | 2.59E-24 | 58  | 49  | EC | 2.59E-24 |
| 9-281  | 9  | 129780194 | 129780194 | EC | NONE | 129780194 | 0 | 3.15E-21 | 64  | 61  | EC | 3.15E-21 |
| 9-310  | 9  | 138796123 | 138796123 | EC | NONE | 138796123 | 0 | 5.46E-46 | 55  | 51  | EC | 5.46E-46 |
| 9-317  | 9  | 141007998 | 141007998 | EC | NONE | 141007998 | 0 | 3.11E-15 | 50  | 48  | EC | 3.11E-15 |
| 9-324  | 9  | 143438030 | 143438030 | EC | NONE | 143438030 | 0 | 7.09E-36 | 85  | 74  | EC | 7.09E-36 |
| 9-330  | 9  | 144464570 | 144464570 | EC | NONE | 144464570 | 0 | 1.16E-17 | 71  | 62  | EC | 1.16E-17 |
| 9-347  | 9  | 150239302 | 150239302 | EC | NONE | 150239302 | 0 | 1.33E-29 | 77  | 56  | EC | 1.33E-29 |
| 10-16  | 10 | 8166660   | 8166660   | EC | NONE | 8166660   | 0 | 3.94E-53 | 69  | 56  | EC | 3.94E-53 |
| 10-24  | 10 | 9709262   | 9709262   | EC | NONE | 9709262   | 0 | 7.56E-20 | 69  | 62  | EC | 7.56E-20 |
| 10-27  | 10 | 10335480  | 10335480  | EC | NONE | 10335480  | 0 | 5.67E-27 | 85  | 74  | EC | 5.67E-27 |
| 10-30  | 10 | 13536953  | 13536953  | EC | NONE | 13536953  | 0 | 8.20E-27 | 47  | 42  | EC | 8.20E-27 |
| 10-58  | 10 | 26426711  | 26426711  | EC | NONE | 26426711  | 0 | 5.19E-62 | 64  | 60  | EC | 5.19E-62 |
| 10-116 | 10 | 56549665  | 56549665  | EC | NONE | 56549665  | 0 | 3.27E-32 | 63  | 59  | EC | 3.27E-32 |

|        |    |           |           |    |            |           |           |           |       |          |    |    |     |          |
|--------|----|-----------|-----------|----|------------|-----------|-----------|-----------|-------|----------|----|----|-----|----------|
| 10-117 | 10 | 56685713  | 56685713  | EC | NONE       |           |           | 56685713  | 0     | 4.87E-13 | 64 | 55 | EC  | 4.87E-13 |
| 10-118 | 10 | 56708562  | 56708562  | EC | NONE       |           |           | 56708562  | 0     | 4.75E-21 | 68 | 65 | EC  | 4.75E-21 |
| 10-123 | 10 | 58827008  | 58827008  | EC | NONE       |           |           | 58827008  | 0     | 1.55E-32 | 66 | 57 | EC  | 1.55E-32 |
| 10-125 | 10 | 60862199  | 60862199  | EC | NONE       |           |           | 60862199  | 0     | 3.93E-19 | 67 | 57 | EC  | 3.93E-19 |
| 10-127 | 10 | 61076689  | 61076689  | EC | NONE       |           |           | 61076689  | 0     | 7.21E-37 | 77 | 71 | EC  | 7.21E-37 |
| 10-128 | 10 | 61092777  | 61092777  | EC | NONE       |           |           | 61092777  | 0     | 1.17E-26 | 75 | 62 | EC  | 1.17E-26 |
| 10-175 | 10 | 79378371  | 79378371  | EC | NONE       |           |           | 79378371  | 0     | 1.61E-28 | 82 | 67 | EC  | 1.61E-28 |
| 10-179 | 10 | 82955169  | 82955169  | EC | NONE       |           |           | 82955169  | 0     | 4.79E-29 | 62 | 48 | EC  | 4.79E-29 |
| 10-188 | 10 | 86152956  | 86152956  | EC | NONE       |           |           | 86152956  | 0     | 3.14E-19 | 62 | 54 | EC  | 3.14E-19 |
| 10-189 | 10 | 86246693  | 86246693  | EC | NONE       |           |           | 86246693  | 0     | 1.62E-38 | 66 | 58 | EC  | 1.62E-38 |
| 10-201 | 10 | 92520853  | 92520853  | EC | NONE       |           |           | 92520853  | 0     | 1.63E-12 | 39 | 39 | EC  | 1.63E-12 |
| 10-204 | 10 | 93269374  | 93269374  | EC | NONE       |           |           | 93269374  | 0     | 7.76E-30 | 59 | 48 | EC  | 7.76E-30 |
| 10-205 | 10 | 97516679  | 97516679  | EC | NONE       |           |           | 97516679  | 0     | 1.19E-29 | 48 | 43 | EC  | 1.19E-29 |
| 10-209 | 10 | 98238151  | 98238151  | EC | NONE       |           |           | 98238151  | 0     | 2.90E-31 | 50 | 41 | EC  | 2.90E-31 |
| 10-221 | 10 | 104074602 | 104074602 | EC | NONE       |           |           | 104074602 | 0     | 2.23E-65 | 94 | 82 | EC  | 2.23E-65 |
| 10-224 | 10 | 104678850 | 104678850 | EC | NONE       |           |           | 104678850 | 0     | 9.13E-36 | 82 | 62 | EC  | 9.13E-36 |
| 10-234 | 10 | 106947178 | 106947178 | EC | NONE       |           |           | 106947178 | 0     | 1.15E-21 | 66 | 61 | EC  | 1.15E-21 |
| 10-249 | 10 | 109648049 | 109648049 | EC | NONE       |           |           | 109648049 | 0     | 1.38E-26 | 67 | 62 | EC  | 1.38E-26 |
| 10-257 | 10 | 110978619 | 110978619 | EC | NONE       |           |           | 110978619 | 0     | 9.00E-27 | 54 | 52 | EC  | 9.00E-27 |
| 10-264 | 10 | 112768345 | 112768345 | EC | NONE       |           |           | 112768345 | 0     | 9.55E-44 | 74 | 63 | EC  | 9.55E-44 |
| 10-276 | 10 | 114810659 | 114810659 | EC | NONE       |           |           | 114810659 | 0     | 3.18E-25 | 67 | 62 | EC  | 3.18E-25 |
| 10-277 | 10 | 114841704 | 114841704 | EC | NONE       |           |           | 114841704 | 0     | 4.44E-27 | 68 | 64 | EC  | 4.44E-27 |
| 10-282 | 10 | 116139077 | 116139077 | EC | NONE       |           |           | 116139077 | 0     | 9.77E-36 | 61 | 53 | EC  | 9.77E-36 |
| 10-303 | 10 | 124824915 | 124824915 | EC | NONE       |           |           | 124824915 | 0     | 1.32E-36 | 66 | 63 | EC  | 1.32E-36 |
| 10-306 | 10 | 127178656 | 127178656 | EC | NONE       |           |           | 127178656 | 0     | 1.33E-32 | 64 | 49 | EC  | 1.33E-32 |
| 10-315 | 10 | 136073180 | 136073180 | EC | NONE       |           |           | 136073180 | 0     | 1.88E-38 | 74 | 65 | EC  | 1.88E-38 |
| 10-317 | 10 | 137146550 | 137146550 | EC | NONE       |           |           | 137146550 | 0     | 7.87E-08 | 18 | 14 | EC  | 7.87E-08 |
| 1-331  | 1  | 110629368 | 110662204 | MC | gap called | 110629368 | 110662204 |           | 7382  | 7.12E-23 | 48 | 42 | INS | 7.12E-23 |
| 2-273  | 2  | 102295413 | 102405897 | MC | gap called | 102295413 | 102405897 |           | 12587 | 1.97E-10 | 20 | 17 | INS | 1.97E-10 |
| 3-205  | 3  | 83327834  | 83402352  | MC | gap called | 83327834  | 83402352  |           | 9107  | 5.65E-21 | 39 | 35 | INS | 5.65E-21 |
| 8-43   | 8  | 14486174  | 14615014  | MC | gap called | 14486174  | 14615014  |           | 11880 | 5.54E-11 | 42 | 28 | INS | 5.54E-11 |
| 1-17   | 1  | 8469067   | 8469067   | MC | NONE       |           |           | 8469067   | 0     | 1.44E-30 | 63 | 1  | MC  | 1.44E-30 |
| 1-18   | 1  | 8474356   | 8474356   | MC | NONE       |           |           | 8474356   | 0     | 1.44E-30 | 63 | 1  | MC  | 1.44E-30 |
| 1-27   | 1  | 9715587   | 9715587   | MC | NONE       |           |           | 9715587   | 0     | 1.53E-19 | 76 | 6  | MC  | 1.53E-19 |
| 1-40   | 1  | 12704032  | 12704032  | MC | NONE       |           |           | 12704032  | 0     | 1.48E-23 | 75 | 2  | MC  | 1.48E-23 |
| 1-63   | 1  | 16631014  | 16631014  | MC | NONE       |           |           | 16631014  | 0     | 2.20E-11 | 41 | 5  | MC  | 2.20E-11 |
| 1-89   | 1  | 31448785  | 31448785  | MC | NONE       |           |           | 31448785  | 0     | 1.40E-20 | 48 | 2  | MC  | 1.40E-20 |
| 1-99   | 1  | 36117949  | 36117949  | MC | NONE       |           |           | 36117949  | 0     | 3.05E-02 | 53 | 22 | MC  | 3.05E-02 |
| 1-102  | 1  | 36526242  | 36526242  | MC | NONE       |           |           | 36526242  | 0     | 8.05E-18 | 33 | 0  | MC  | 8.05E-18 |
| 1-121  | 1  | 47211052  | 47211052  | MC | NONE       |           |           | 47211052  | 0     | 7.82E-10 | 57 | 10 | MC  | 7.82E-10 |
| 1-143  | 1  | 57389824  | 57389824  | MC | NONE       |           |           | 57389824  | 0     | 4.39E-28 | 63 | 1  | MC  | 4.39E-28 |
| 1-185  | 1  | 67993488  | 67993488  | MC | NONE       |           |           | 67993488  | 0     | 8.12E-33 | 85 | 3  | MC  | 8.12E-33 |
| 1-210  | 1  | 75824601  | 75824601  | MC | NONE       |           |           | 75824601  | 0     | 2.20E-07 | 42 | 2  | MC  | 2.20E-07 |
| 1-239  | 1  | 84975673  | 84975673  | MC | NONE       |           |           | 84975673  | 0     | 1.28E-36 | 69 | 2  | MC  | 1.28E-36 |
| 1-242  | 1  | 87816176  | 87816176  | MC | NONE       |           |           | 87816176  | 0     | 1.13E-19 | 59 | 3  | MC  | 1.13E-19 |
| 1-251  | 1  | 89142269  | 89142269  | MC | NONE       |           |           | 89142269  | 0     | 1.98E-23 | 58 | 1  | MC  | 1.98E-23 |
| 1-265  | 1  | 92850716  | 92850716  | MC | NONE       |           |           | 92850716  | 0     | 1.92E-12 | 47 | 3  | MC  | 1.92E-12 |
| 1-272  | 1  | 95620897  | 95620897  | MC | NONE       |           |           | 95620897  | 0     | 4.56E-13 | 61 | 6  | MC  | 4.56E-13 |
| 1-284  | 1  | 100721701 | 100721701 | MC | NONE       |           |           | 100721701 | 0     | 3.88E-26 | 82 | 6  | MC  | 3.88E-26 |
| 1-285  | 1  | 100729916 | 100729916 | MC | NONE       |           |           | 100729916 | 0     | 7.45E-29 | 82 | 4  | MC  | 7.45E-29 |
| 1-290  | 1  | 102141905 | 102141905 | MC | NONE       |           |           | 102141905 | 0     | 4.08E-11 | 45 | 3  | MC  | 4.08E-11 |
| 1-310  | 1  | 105373990 | 105373990 | MC | NONE       |           |           | 105373990 | 0     | 5.85E-14 | 59 | 2  | MC  | 5.85E-14 |
| 1-311  | 1  | 105426843 | 105426843 | MC | NONE       |           |           | 105426843 | 0     | 1.03E-09 | 59 | 6  | MC  | 1.03E-09 |
| 1-338  | 1  | 111752631 | 111752631 | MC | NONE       |           |           | 111752631 | 0     | 6.31E-18 | 62 | 6  | MC  | 6.31E-18 |
| 1-350  | 1  | 114098648 | 114098648 | MC | NONE       |           |           | 114098648 | 0     | 1.15E-36 | 81 | 2  | MC  | 1.15E-36 |
| 1-358  | 1  | 117774690 | 117774690 | MC | NONE       |           |           | 117774690 | 0     | 5.36E-31 | 68 | 0  | MC  | 5.36E-31 |
| 1-359  | 1  | 118151239 | 118151239 | MC | NONE       |           |           | 118151239 | 0     | 3.24E-13 | 48 | 1  | MC  | 3.24E-13 |
| 1-366  | 1  | 119716422 | 119716422 | MC | NONE       |           |           | 119716422 | 0     | 8.77E-17 | 47 | 1  | MC  | 8.77E-17 |
| 1-399  | 1  | 130226945 | 130226945 | MC | NONE       |           |           | 130226945 | 0     | 4.23E-23 | 57 | 0  | MC  | 4.23E-23 |
| 1-409  | 1  | 135362390 | 135362390 | MC | NONE       |           |           | 135362390 | 0     | 8.75E-29 | 60 | 2  | MC  | 8.75E-29 |
| 1-426  | 1  | 142399920 | 142399920 | MC | NONE       |           |           | 142399920 | 0     | 6.40E-03 | 17 | 3  | MC  | 6.40E-03 |
| 1-435  | 1  | 144861356 | 144861356 | MC | NONE       |           |           | 144861356 | 0     | 2.35E-18 | 55 | 2  | MC  | 2.35E-18 |
| 1-441  | 1  | 146743480 | 146743480 | MC | NONE       |           |           | 146743480 | 0     | 8.16E-11 | 56 | 6  | MC  | 8.16E-11 |
| 1-443  | 1  | 149821062 | 149821062 | MC | NONE       |           |           | 149821062 | 0     | 4.99E-09 | 28 | 2  | MC  | 4.99E-09 |
| 1-452  | 1  | 154464779 | 154464779 | MC | NONE       |           |           | 154464779 | 0     | 1.03E-47 | 89 | 2  | MC  | 1.03E-47 |
| 1-459  | 1  | 156698434 | 156698434 | MC | NONE       |           |           | 156698434 | 0     | 1.73E-29 | 62 | 1  | MC  | 1.73E-29 |
| 1-466  | 1  | 158268305 | 158268305 | MC | NONE       |           |           | 158268305 | 0     | 4.16E-21 | 49 | 1  | MC  | 4.16E-21 |
| 1-479  | 1  | 161090720 | 161090720 | MC | NONE       |           |           | 161090720 | 0     | 2.08E-02 | 14 | 2  | MC  | 2.08E-02 |
| 1-500  | 1  | 166128124 | 166128124 | MC | NONE       |           |           | 166128124 | 0     | 8.90E-35 | 68 | 3  | MC  | 8.90E-35 |
| 1-522  | 1  | 172423934 | 172423934 | MC | NONE       |           |           | 172423934 | 0     | 4.13E-32 | 68 | 1  | MC  | 4.13E-32 |
| 1-532  | 1  | 174800188 | 174800188 | MC | NONE       |           |           | 174800188 | 0     | 8.60E-19 | 64 | 4  | MC  | 8.60E-19 |
| 1-533  | 1  | 174895205 | 174895205 | MC | NONE       |           |           | 174895205 | 0     | 6.29E-30 | 76 | 3  | MC  | 6.29E-30 |
| 1-556  | 1  | 186089953 | 186089953 | MC | NONE       |           |           | 186089953 | 0     | 6.90E-12 | 26 | 0  | MC  | 6.90E-12 |
| 1-566  | 1  | 192481898 | 192481898 | MC | NONE       |           |           | 192481898 | 0     | 3.01E-22 | 77 | 7  | MC  | 3.01E-22 |
| 1-588  | 1  | 197373647 | 197373647 | MC | NONE       |           |           | 197373647 | 0     | 4.32E-22 | 69 | 4  | MC  | 4.32E-22 |
| 1-597  | 1  | 199727777 | 199727777 | MC | NONE       |           |           | 199727777 | 0     | 1.58E-16 | 62 | 4  | MC  | 1.58E-16 |
| 1-618  | 1  | 209396907 | 209396907 | MC | NONE       |           |           | 209396907 | 0     | 2.12E-06 | 30 | 0  | MC  | 2.12E-06 |
| 1-644  | 1  | 217233105 | 217233105 | MC | NONE       |           |           | 217233105 | 0     | 1.93E-18 | 66 | 4  | MC  | 1.93E-18 |
| 1-651  | 1  | 219565045 | 219565045 | MC | NONE       |           |           | 219565045 | 0     | 2.49E-19 | 57 | 4  | MC  | 2.49E-19 |
| 1-655  | 1  | 220276222 | 220276222 | MC | NONE       |           |           | 220276222 | 0     | 5.46E-24 | 54 | 2  | MC  | 5.46E-24 |
| 1-657  | 1  | 220631106 | 220631106 | MC | NONE       |           |           | 220631106 | 0     | 3.95E-11 | 37 | 2  | MC  | 3.95E-11 |
| 1-685  | 1  | 230651586 | 230651586 | MC | NONE       |           |           | 230651586 | 0     | 5.06E-36 | 73 | 2  | MC  | 5.06E-36 |
| 1-687  | 1  | 230965215 | 230965215 | MC | NONE       |           |           | 230965215 | 0     | 2.65E-40 | 89 | 4  | MC  | 2.65E-40 |
| 1-716  | 1  | 245707727 | 245707727 | MC | NONE       |           |           | 245707727 | 0     | 3.16E-38 | 80 | 4  | MC  | 3.16E-38 |
| 1-743  | 1  | 255455688 | 255455688 | MC | NONE       |           |           | 255455688 | 0     | 7.41E-14 | 27 | 1  | MC  | 7.41E-14 |
| 1-744  | 1  | 257826613 | 257826613 | MC | NONE       |           |           | 257826613 | 0     | 2.40E-27 | 64 | 2  | MC  | 2.40E-27 |
| 1-795  | 1  | 286601807 | 286601807 | MC | NONE       |           |           | 286601807 | 0     | 6.05E-04 | 23 | 4  | MC  | 6.05E-04 |
| 2-4    | 2  | 4768557   | 4768557   | MC | NONE       |           |           | 4768557   | 0     | 3.09E-20 | 60 | 2  | MC  | 3.09E-20 |
| 2-80   | 2  | 31830182  | 31830182  | MC | NONE       |           |           | 31830182  | 0     | 1.32E-11 | 50 | 4  | MC  | 1.32E-11 |
| 2-88   | 2  | 33246665  | 33246665  | MC | NONE       |           |           | 33246665  | 0     | 1.42E-28 | 48 | 0  | MC  | 1.42E-28 |
| 2-95   | 2  | 36999296  | 36999296  | MC | NONE       |           |           | 36999296  | 0     | 3.45E-21 | 60 | 2  | MC  | 3.45E-21 |

|       |   |           |           |    |      |           |   |          |     |    |    |          |
|-------|---|-----------|-----------|----|------|-----------|---|----------|-----|----|----|----------|
| 2-147 | 2 | 59895892  | 59895892  | MC | NONE | 59895892  | 0 | 6.37E-12 | 35  | 1  | MC | 6.37E-12 |
| 2-155 | 2 | 62735951  | 62735951  | MC | NONE | 62735951  | 0 | 5.48E-43 | 77  | 1  | MC | 5.48E-43 |
| 2-160 | 2 | 66610859  | 66610859  | MC | NONE | 66610859  | 0 | 3.98E-23 | 55  | 3  | MC | 3.98E-23 |
| 2-184 | 2 | 71816278  | 71816278  | MC | NONE | 71816278  | 0 | 3.75E-08 | 25  | 0  | MC | 3.75E-08 |
| 2-199 | 2 | 75968566  | 75968566  | MC | NONE | 75968566  | 0 | 3.84E-11 | 39  | 2  | MC | 3.84E-11 |
| 2-202 | 2 | 76618903  | 76618903  | MC | NONE | 76618903  | 0 | 6.27E-09 | 39  | 3  | MC | 6.27E-09 |
| 2-211 | 2 | 81612721  | 81612721  | MC | NONE | 81612721  | 0 | 9.23E-05 | 26  | 2  | MC | 9.23E-05 |
| 2-303 | 2 | 208123393 | 208123393 | MC | NONE | 208123393 | 0 | 6.51E-17 | 66  | 5  | MC | 6.51E-17 |
| 2-309 | 2 | 209477480 | 209477480 | MC | NONE | 209477480 | 0 | 5.03E-30 | 72  | 5  | MC | 5.03E-30 |
| 2-337 | 2 | 221477525 | 221477525 | MC | NONE | 221477525 | 0 | 2.49E-35 | 59  | 0  | MC | 2.49E-35 |
| 2-346 | 2 | 228360330 | 228360330 | MC | NONE | 228360330 | 0 | 2.92E-19 | 49  | 5  | MC | 2.92E-19 |
| 3-2   | 3 | 2156033   | 2156033   | MC | NONE | 2156033   | 0 | 4.31E-23 | 77  | 7  | MC | 4.31E-23 |
| 3-13  | 3 | 12857738  | 12857738  | MC | NONE | 12857738  | 0 | 1.45E-12 | 58  | 5  | MC | 1.45E-12 |
| 3-20  | 3 | 18418199  | 18418199  | MC | NONE | 18418199  | 0 | 2.33E-12 | 46  | 4  | MC | 2.33E-12 |
| 3-42  | 3 | 30912094  | 30912094  | MC | NONE | 30912094  | 0 | 9.83E-16 | 34  | 0  | MC | 9.83E-16 |
| 3-54  | 3 | 33900579  | 33900579  | MC | NONE | 33900579  | 0 | 8.49E-06 | 25  | 1  | MC | 8.49E-06 |
| 3-62  | 3 | 36358375  | 36358375  | MC | NONE | 36358375  | 0 | 3.25E-38 | 79  | 4  | MC | 3.25E-38 |
| 3-68  | 3 | 37818708  | 37818708  | MC | NONE | 37818708  | 0 | 2.84E-18 | 66  | 3  | MC | 2.84E-18 |
| 3-103 | 3 | 46258737  | 46258737  | MC | NONE | 46258737  | 0 | 3.69E-25 | 72  | 8  | MC | 3.69E-25 |
| 3-118 | 3 | 50290863  | 50290863  | MC | NONE | 50290863  | 0 | 1.63E-07 | 37  | 4  | MC | 1.63E-07 |
| 3-179 | 3 | 74994349  | 74994349  | MC | NONE | 74994349  | 0 | 1.59E-03 | 22  | 4  | MC | 1.59E-03 |
| 3-184 | 3 | 77130533  | 77130533  | MC | NONE | 77130533  | 0 | 6.53E-09 | 21  | 1  | MC | 6.53E-09 |
| 3-223 | 3 | 90714635  | 90714635  | MC | NONE | 90714635  | 0 | 8.34E-04 | 25  | 2  | MC | 8.34E-04 |
| 3-225 | 3 | 91708339  | 91708339  | MC | NONE | 91708339  | 0 | 9.96E-04 | 35  | 5  | MC | 9.96E-04 |
| 3-236 | 3 | 99325467  | 99325467  | MC | NONE | 99325467  | 0 | 4.23E-04 | 20  | 1  | MC | 4.23E-04 |
| 3-276 | 3 | 113391835 | 113391835 | MC | NONE | 113391835 | 0 | 7.25E-08 | 24  | 1  | MC | 7.25E-08 |
| 3-281 | 3 | 116806154 | 116806154 | MC | NONE | 116806154 | 0 | 1.92E-10 | 41  | 1  | MC | 1.92E-10 |
| 3-292 | 3 | 125276894 | 125276894 | MC | NONE | 125276894 | 0 | 2.58E-15 | 50  | 2  | MC | 2.58E-15 |
| 3-296 | 3 | 126401266 | 126401266 | MC | NONE | 126401266 | 0 | 2.15E-17 | 64  | 8  | MC | 2.15E-17 |
| 3-306 | 3 | 131956850 | 131956850 | MC | NONE | 131956850 | 0 | 5.01E-16 | 70  | 6  | MC | 5.01E-16 |
| 3-333 | 3 | 140426950 | 140426950 | MC | NONE | 140426950 | 0 | 8.59E-21 | 39  | 0  | MC | 8.59E-21 |
| 3-336 | 3 | 141292978 | 141292978 | MC | NONE | 141292978 | 0 | 2.20E-23 | 56  | 3  | MC | 2.20E-23 |
| 3-392 | 3 | 168853954 | 168853954 | MC | NONE | 168853954 | 0 | 1.27E-30 | 58  | 1  | MC | 1.27E-30 |
| 3-398 | 3 | 173796887 | 173796887 | MC | NONE | 173796887 | 0 | 7.04E-22 | 75  | 5  | MC | 7.04E-22 |
| 3-411 | 3 | 181842433 | 181842433 | MC | NONE | 181842433 | 0 | 1.91E-18 | 63  | 5  | MC | 1.91E-18 |
| 3-425 | 3 | 185045756 | 185045756 | MC | NONE | 185045756 | 0 | 1.93E-22 | 68  | 2  | MC | 1.93E-22 |
| 3-437 | 3 | 187416941 | 187416941 | MC | NONE | 187416941 | 0 | 4.95E-25 | 79  | 5  | MC | 4.95E-25 |
| 3-450 | 3 | 194195302 | 194195302 | MC | NONE | 194195302 | 0 | 1.54E-09 | 37  | 3  | MC | 1.54E-09 |
| 3-455 | 3 | 196144505 | 196144505 | MC | NONE | 196144505 | 0 | 3.52E-09 | 38  | 3  | MC | 3.52E-09 |
| 3-458 | 3 | 199360808 | 199360808 | MC | NONE | 199360808 | 0 | 1.61E-30 | 63  | 2  | MC | 1.61E-30 |
| 3-461 | 3 | 200962455 | 200962455 | MC | NONE | 200962455 | 0 | 3.31E-28 | 68  | 5  | MC | 3.31E-28 |
| 3-477 | 3 | 204718882 | 204718882 | MC | NONE | 204718882 | 0 | 4.69E-26 | 58  | 2  | MC | 4.69E-26 |
| 3-506 | 3 | 213969732 | 213969732 | MC | NONE | 213969732 | 0 | 2.64E-36 | 82  | 4  | MC | 2.64E-36 |
| 3-509 | 3 | 214707938 | 214707938 | MC | NONE | 214707938 | 0 | 1.49E-26 | 72  | 5  | MC | 1.49E-26 |
| 3-524 | 3 | 218481674 | 218481674 | MC | NONE | 218481674 | 0 | 3.76E-02 | 12  | 1  | MC | 3.76E-02 |
| 4-5   | 4 | 5708728   | 5708728   | MC | NONE | 5708728   | 0 | 2.76E-26 | 60  | 0  | MC | 2.76E-26 |
| 4-11  | 4 | 6634841   | 6634841   | MC | NONE | 6634841   | 0 | 9.16E-02 | 82  | 47 | MC | 9.16E-02 |
| 4-41  | 4 | 16816048  | 16816048  | MC | NONE | 16816048  | 0 | 2.44E-03 | 31  | 5  | MC | 2.44E-03 |
| 4-43  | 4 | 18220340  | 18220340  | MC | NONE | 18220340  | 0 | 3.23E-31 | 73  | 1  | MC | 3.23E-31 |
| 4-48  | 4 | 18717367  | 18717367  | MC | NONE | 18717367  | 0 | 4.70E-16 | 51  | 4  | MC | 4.70E-16 |
| 4-60  | 4 | 25977701  | 25977701  | MC | NONE | 25977701  | 0 | 8.48E-19 | 66  | 5  | MC | 8.48E-19 |
| 4-70  | 4 | 32183069  | 32183069  | MC | NONE | 32183069  | 0 | 1.21E-16 | 55  | 6  | MC | 1.21E-16 |
| 4-87  | 4 | 39875818  | 39875818  | MC | NONE | 39875818  | 0 | 1.87E-27 | 50  | 1  | MC | 1.87E-27 |
| 4-123 | 4 | 53223372  | 53223372  | MC | NONE | 53223372  | 0 | 1.99E-10 | 42  | 5  | MC | 1.99E-10 |
| 4-130 | 4 | 55425110  | 55425110  | MC | NONE | 55425110  | 0 | 5.68E-20 | 42  | 2  | MC | 5.68E-20 |
| 4-144 | 4 | 63732250  | 63732250  | MC | NONE | 63732250  | 0 | 4.30E-18 | 37  | 0  | MC | 4.30E-18 |
| 4-149 | 4 | 66142051  | 66142051  | MC | NONE | 66142051  | 0 | 1.37E-03 | 22  | 1  | MC | 1.37E-03 |
| 4-159 | 4 | 69334626  | 69334626  | MC | NONE | 69334626  | 0 | 2.09E-42 | 93  | 3  | MC | 2.09E-42 |
| 4-187 | 4 | 79940335  | 79940335  | MC | NONE | 79940335  | 0 | 6.06E-11 | 53  | 6  | MC | 6.06E-11 |
| 4-196 | 4 | 81838376  | 81838376  | MC | NONE | 81838376  | 0 | 1.08E-38 | 74  | 2  | MC | 1.08E-38 |
| 4-211 | 4 | 85712635  | 85712635  | MC | NONE | 85712635  | 0 | 2.30E-10 | 47  | 2  | MC | 2.30E-10 |
| 4-241 | 4 | 93322530  | 93322530  | MC | NONE | 93322530  | 0 | 6.37E-08 | 42  | 3  | MC | 6.37E-08 |
| 4-265 | 4 | 101079127 | 101079127 | MC | NONE | 101079127 | 0 | 5.03E-32 | 67  | 3  | MC | 5.03E-32 |
| 4-309 | 4 | 120212381 | 120212381 | MC | NONE | 120212381 | 0 | 1.08E-29 | 61  | 1  | MC | 1.08E-29 |
| 4-322 | 4 | 123625090 | 123625090 | MC | NONE | 123625090 | 0 | 2.75E-09 | 33  | 0  | MC | 2.75E-09 |
| 4-326 | 4 | 129451144 | 129451144 | MC | NONE | 129451144 | 0 | 4.95E-07 | 35  | 4  | MC | 4.95E-07 |
| 4-341 | 4 | 137349588 | 137349588 | MC | NONE | 137349588 | 0 | 2.26E-22 | 48  | 0  | MC | 2.26E-22 |
| 4-367 | 4 | 146014515 | 146014515 | MC | NONE | 146014515 | 0 | 2.32E-39 | 95  | 4  | MC | 2.32E-39 |
| 4-376 | 4 | 152953164 | 152953164 | MC | NONE | 152953164 | 0 | 1.37E-20 | 58  | 1  | MC | 1.37E-20 |
| 4-379 | 4 | 153467855 | 153467855 | MC | NONE | 153467855 | 0 | 5.74E-19 | 47  | 3  | MC | 5.74E-19 |
| 4-391 | 4 | 157639832 | 157639832 | MC | NONE | 157639832 | 0 | 6.84E-25 | 62  | 2  | MC | 6.84E-25 |
| 4-401 | 4 | 159460693 | 159460693 | MC | NONE | 159460693 | 0 | 3.02E-02 | 17  | 4  | MC | 3.02E-02 |
| 4-432 | 4 | 166505562 | 166505562 | MC | NONE | 166505562 | 0 | 2.24E-15 | 40  | 1  | MC | 2.24E-15 |
| 4-433 | 4 | 166624122 | 166624122 | MC | NONE | 166624122 | 0 | 0.00E+00 | 24  | 24 | MC | 0.00E+00 |
| 4-468 | 4 | 177343455 | 177343455 | MC | NONE | 177343455 | 0 | 8.20E-11 | 45  | 5  | MC | 8.20E-11 |
| 4-469 | 4 | 181473920 | 181473920 | MC | NONE | 181473920 | 0 | 1.03E-06 | 36  | 3  | MC | 1.03E-06 |
| 4-475 | 4 | 183302960 | 183302960 | MC | NONE | 183302960 | 0 | 2.35E-07 | 30  | 1  | MC | 2.35E-07 |
| 4-481 | 4 | 186097900 | 186097900 | MC | NONE | 186097900 | 0 | 1.79E-49 | 108 | 2  | MC | 1.79E-49 |
| 4-518 | 4 | 202025909 | 202025909 | MC | NONE | 202025909 | 0 | 1.36E-18 | 66  | 4  | MC | 1.36E-18 |
| 4-558 | 4 | 212338556 | 212338556 | MC | NONE | 212338556 | 0 | 3.21E-06 | 25  | 1  | MC | 3.21E-06 |
| 4-560 | 4 | 212950323 | 212950323 | MC | NONE | 212950323 | 0 | 2.00E-17 | 63  | 7  | MC | 2.00E-17 |
| 4-600 | 4 | 223730332 | 223730332 | MC | NONE | 223730332 | 0 | 4.75E-26 | 52  | 1  | MC | 4.75E-26 |
| 4-663 | 4 | 242834226 | 242834226 | MC | NONE | 242834226 | 0 | 3.68E-12 | 36  | 1  | MC | 3.68E-12 |
| 5-22  | 5 | 5098781   | 5098781   | MC | NONE | 5098781   | 0 | 1.26E-16 | 69  | 5  | MC | 1.26E-16 |
| 5-76  | 5 | 34328789  | 34328789  | MC | NONE | 34328789  | 0 | 4.66E-23 | 65  | 2  | MC | 4.66E-23 |
| 5-105 | 5 | 44116379  | 44116379  | MC | NONE | 44116379  | 0 | 5.36E-08 | 21  | 2  | MC | 5.36E-08 |
| 5-126 | 5 | 52377267  | 52377267  | MC | NONE | 52377267  | 0 | 1.27E-36 | 82  | 3  | MC | 1.27E-36 |
| 5-136 | 5 | 55732001  | 55732001  | MC | NONE | 55732001  | 0 | 1.33E-23 | 57  | 2  | MC | 1.33E-23 |
| 5-144 | 5 | 57050933  | 57050933  | MC | NONE | 57050933  | 0 | 4.35E-28 | 81  | 7  | MC | 4.35E-28 |
| 5-160 | 5 | 65506917  | 65506917  | MC | NONE | 65506917  | 0 | 8.11E-08 | 53  | 6  | MC | 8.11E-08 |
| 5-164 | 5 | 66942514  | 66942514  | MC | NONE | 66942514  | 0 | 1.69E-26 | 56  | 1  | MC | 1.69E-26 |

complex event

|        |    |           |           |      |                         |           |         |          |          |    |    |           |          |
|--------|----|-----------|-----------|------|-------------------------|-----------|---------|----------|----------|----|----|-----------|----------|
| 5-178  | 5  | 72421917  | 72421917  | MC   | NONE                    | 72421917  | 0       | 1.15E-16 | 53       | 3  | MC | 1.15E-16  |          |
| 5-238  | 5  | 91588086  | 91588086  | MC   | NONE                    | 91588086  | 0       | 1.38E-12 | 51       | 6  | MC | 1.38E-12  |          |
| 5-253  | 5  | 96997412  | 96997412  | MC   | NONE                    | 96997412  | 0       | 4.03E-37 | 65       | 0  | MC | 4.03E-37  |          |
| 5-288  | 5  | 110367490 | 110367490 | MC   | NONE                    | 110367490 | 0       | 2.83E-24 | 80       | 9  | MC | 2.83E-24  |          |
| 5-315  | 5  | 121817277 | 121817277 | MC   | NONE                    | 121817277 | 0       | 6.06E-21 | 47       | 1  | MC | 6.06E-21  |          |
| 5-354  | 5  | 134421650 | 134421650 | MC   | NONE                    | 134421650 | 0       | 5.28E-20 | 47       | 2  | MC | 5.28E-20  |          |
| 5-357  | 5  | 135045110 | 135045110 | MC   | NONE                    | 135045110 | 0       | 9.50E-23 | 69       | 5  | MC | 9.50E-23  |          |
| 5-422  | 5  | 159716803 | 159716803 | MC   | NONE                    | 159716803 | 0       | 3.87E-13 | 38       | 1  | MC | 3.87E-13  |          |
| 5-428  | 5  | 162644504 | 162644504 | MC   | NONE                    | 162644504 | 0       | 2.42E-23 | 69       | 3  | MC | 2.42E-23  |          |
| 6-2    | 6  | 2745119   | 2745119   | MC   | NONE                    | 2745119   | 0       | 2.31E-13 | 53       | 1  | MC | 2.31E-13  |          |
| 6-11   | 6  | 12058770  | 12058770  | MC   | NONE                    | 12058770  | 0       | 9.71E-16 | 61       | 7  | MC | 9.71E-16  |          |
| 6-13   | 6  | 18488728  | 18488728  | MC   | NONE                    | 18488728  | 0       | 5.98E-16 | 58       | 7  | MC | 5.98E-16  |          |
| 6-23   | 6  | 20808967  | 20808967  | MC   | NONE                    | 20808967  | 0       | 7.11E-18 | 62       | 6  | MC | 7.11E-18  |          |
| 6-25   | 6  | 29535970  | 29535970  | MC   | NONE                    | 29535970  | 0       | 1.41E-06 | 19       | 0  | MC | 1.41E-06  |          |
| 6-91   | 6  | 54941425  | 54941425  | MC   | NONE                    | 54941425  | 0       | 6.00E-17 | 56       | 1  | MC | 6.00E-17  |          |
| 6-118  | 6  | 64676223  | 64676223  | MC   | NONE                    | 64676223  | 0       | 4.66E-26 | 89       | 7  | MC | 4.66E-26  |          |
| 6-138  | 6  | 70373257  | 70373257  | MC   | NONE                    | 70373257  | 0       | 2.58E-09 | 27       | 3  | MC | 2.58E-09  |          |
| 6-141  | 6  | 73894689  | 73894689  | MC   | NONE                    | 73894689  | 0       | 1.77E-17 | 44       | 2  | MC | 1.77E-17  |          |
| 7-26   | 7  | 14095976  | 14095976  | MC   | NONE                    | 14095976  | 0       | 1.14E-12 | 43       | 3  | MC | 1.14E-12  |          |
| 7-37   | 7  | 21314619  | 21314619  | MC   | NONE                    | 21314619  | 0       | 1.99E-07 | 30       | 0  | MC | 1.99E-07  |          |
| 7-90   | 7  | 47790796  | 47790796  | MC   | NONE                    | 47790796  | 0       | 2.89E-11 | 57       | 3  | MC | 2.89E-11  |          |
| 7-104  | 7  | 50751060  | 50751060  | MC   | NONE                    | 50751060  | 0       | 8.45E-16 | 47       | 0  | MC | 8.45E-16  |          |
| 7-112  | 7  | 56617916  | 56617916  | MC   | NONE                    | 56617916  | 0       | 2.79E-06 | 34       | 2  | MC | 2.79E-06  |          |
| 7-129  | 7  | 63134934  | 63134934  | MC   | NONE                    | 63134934  | 0       | 2.27E-08 | 36       | 2  | MC | 2.27E-08  |          |
| 7-191  | 7  | 89183690  | 89183690  | MC   | NONE                    | 89183690  | 0       | 3.49E-09 | 36       | 2  | MC | 3.49E-09  |          |
| 7-205  | 7  | 92818873  | 92818873  | MC   | NONE                    | 92818873  | 0       | 8.59E-17 | 54       | 3  | MC | 8.59E-17  |          |
| 7-213  | 7  | 95238858  | 95238858  | MC   | NONE                    | 95238858  | 0       | 1.12E-19 | 52       | 4  | MC | 1.12E-19  |          |
| 7-220  | 7  | 99086268  | 99086268  | MC   | NONE                    | 99086268  | 0       | 1.64E-31 | 79       | 6  | MC | 1.64E-31  |          |
| 7-296  | 7  | 144805768 | 144805768 | MC   | NONE                    | 144805768 | 0       | 9.65E-09 | 35       | 1  | MC | 9.65E-09  |          |
| 8-56   | 8  | 18748209  | 18748209  | MC   | NONE                    | 18748209  | 0       | 1.03E-29 | 63       | 2  | MC | 1.03E-29  |          |
| 8-59   | 8  | 19922516  | 19922516  | MC   | NONE                    | 19922516  | 0       | 2.20E-02 | 28       | 5  | MC | 2.20E-02  |          |
| 8-84   | 8  | 27020634  | 27020634  | MC   | NONE                    | 27020634  | 0       | 5.33E-26 | 66       | 4  | MC | 5.33E-26  |          |
| 8-127  | 8  | 40658230  | 40658230  | MC   | NONE                    | 40658230  | 0       | 1.21E-21 | 51       | 4  | MC | 1.21E-21  |          |
| 8-144  | 8  | 48329382  | 48329382  | MC   | NONE                    | 48329382  | 0       | 7.15E-18 | 40       | 2  | MC | 7.15E-18  |          |
| 8-158  | 8  | 54851439  | 54851439  | MC   | NONE                    | 54851439  | 0       | 1.20E-18 | 49       | 3  | MC | 1.20E-18  |          |
| 8-169  | 8  | 60645842  | 60645842  | MC   | NONE                    | 60645842  | 0       | 4.26E-28 | 59       | 2  | MC | 4.26E-28  |          |
| 8-172  | 8  | 60748013  | 60748013  | MC   | NONE                    | 60748013  | 0       | 2.00E-24 | 55       | 3  | MC | 2.00E-24  |          |
| 8-179  | 8  | 63935323  | 63935323  | MC   | NONE                    | 63935323  | 0       | 0.00E+00 | 63       | 63 | MC | 0.00E+00  |          |
| 8-277  | 8  | 118599353 | 118599353 | MC   | NONE                    | 118599353 | 0       | 2.56E-16 | 64       | 8  | MC | 2.56E-16  |          |
| 8-280  | 8  | 119329042 | 119329042 | MC   | NONE                    | 119329042 | 0       | 1.76E-07 | 29       | 2  | MC | 1.76E-07  |          |
| 8-293  | 8  | 128905035 | 128905035 | MC   | NONE                    | 128905035 | 0       | 1.15E-25 | 74       | 5  | MC | 1.15E-25  |          |
| 8-296  | 8  | 129198075 | 129198075 | MC   | NONE                    | 129198075 | 0       | 4.14E-25 | 70       | 5  | MC | 4.14E-25  |          |
| 8-306  | 8  | 131129623 | 131129623 | MC   | NONE                    | 131129623 | 0       | 6.79E-13 | 64       | 10 | MC | 6.79E-13  |          |
| 8-311  | 8  | 134586758 | 134586758 | MC   | NONE                    | 134586758 | 0       | 2.83E-04 | 29       | 6  | MC | 2.83E-04  |          |
| 8-322  | 8  | 136508630 | 136508630 | MC   | NONE                    | 136508630 | 0       | 8.43E-36 | 67       | 2  | MC | 8.43E-36  |          |
| 8-334  | 8  | 147640004 | 147640004 | MC   | NONE                    | 147640004 | 0       | 1.22E-17 | 55       | 5  | MC | 1.22E-17  |          |
| 8-346  | 8  | 150109853 | 150109853 | MC   | NONE                    | 150109853 | 0       | 2.49E-41 | 70       | 0  | MC | 2.49E-41  |          |
| 8-369  | 8  | 164150783 | 164150783 | MC   | NONE                    | 164150783 | 0       | 3.71E-04 | 33       | 6  | MC | 3.71E-04  |          |
| 9-41   | 9  | 29802297  | 29802297  | MC   | NONE                    | 29802297  | 0       | 2.92E-04 | 22       | 4  | MC | 2.92E-04  |          |
| 9-63   | 9  | 40164254  | 40164254  | MC   | NONE                    | 40164254  | 0       | 1.94E-21 | 62       | 3  | MC | 1.94E-21  |          |
| 9-75   | 9  | 42885272  | 42885272  | MC   | NONE                    | 42885272  | 0       | 7.62E-20 | 54       | 4  | MC | 7.62E-20  |          |
| 9-98   | 9  | 54953413  | 54953413  | MC   | NONE                    | 54953413  | 0       | 8.22E-08 | 39       | 3  | MC | 8.22E-08  |          |
| 9-104  | 9  | 56673331  | 56673331  | MC   | NONE                    | 56673331  | 0       | 3.27E-13 | 47       | 2  | MC | 3.27E-13  |          |
| 9-110  | 9  | 59063271  | 59063271  | MC   | NONE                    | 59063271  | 0       | 1.17E-08 | 36       | 1  | MC | 1.17E-08  |          |
| 9-118  | 9  | 64162741  | 64162741  | MC   | NONE                    | 64162741  | 0       | 2.89E-34 | 59       | 1  | MC | 2.89E-34  |          |
| 9-158  | 9  | 76368314  | 76368314  | MC   | NONE                    | 76368314  | 0       | 1.68E-31 | 63       | 1  | MC | 1.68E-31  |          |
| 9-161  | 9  | 76759941  | 76759941  | MC   | NONE                    | 76759941  | 0       | 2.01E-55 | 94       | 0  | MC | 2.01E-55  |          |
| 9-185  | 9  | 86422605  | 86422605  | MC   | NONE                    | 86422605  | 0       | 6.07E-36 | 79       | 3  | MC | 6.07E-36  |          |
| 9-200  | 9  | 90180655  | 90180655  | MC   | NONE                    | 90180655  | 0       | 3.04E-35 | 74       | 2  | MC | 3.04E-35  |          |
| 9-203  | 9  | 91003389  | 91003389  | MC   | NONE                    | 91003389  | 0       | 1.35E-05 | 35       | 2  | MC | 1.35E-05  |          |
| 9-233  | 9  | 97770681  | 97770681  | MC   | NONE                    | 97770681  | 0       | 7.66E-12 | 37       | 2  | MC | 7.66E-12  |          |
| 9-239  | 9  | 98609227  | 98609227  | MC   | NONE                    | 98609227  | 0       | 1.15E-37 | 70       | 0  | MC | 1.15E-37  |          |
| 9-274  | 9  | 120392089 | 120392089 | MC   | NONE                    | 120392089 | 0       | 3.19E-21 | 52       | 2  | MC | 3.19E-21  |          |
| 9-294  | 9  | 135192122 | 135192122 | MC   | NONE                    | 135192122 | 0       | 3.70E-25 | 71       | 5  | MC | 3.70E-25  |          |
| 9-303  | 9  | 137165465 | 137165465 | MC   | NONE                    | 137165465 | 0       | 1.31E-28 | 66       | 3  | MC | 1.31E-28  |          |
| 9-328  | 9  | 144156956 | 144156956 | MC   | NONE                    | 144156956 | 0       | 2.47E-21 | 66       | 2  | MC | 2.47E-21  |          |
| 10-2   | 10 | 436495    | 436495    | MC   | NONE                    | 436495    | 0       | 2.52E-52 | 128      | 6  | MC | 2.52E-52  |          |
| 10-77  | 10 | 36323277  | 36323277  | MC   | NONE                    | 36323277  | 0       | 4.25E-06 | 20       | 1  | MC | 4.25E-06  |          |
| 10-106 | 10 | 53248122  | 53248122  | MC   | NONE                    | 53248122  | 0       | 8.84E-10 | 38       | 1  | MC | 8.84E-10  |          |
| 10-107 | 10 | 53441045  | 53441045  | MC   | NONE                    | 53441045  | 0       | 5.26E-04 | 27       | 5  | MC | 5.26E-04  |          |
| 10-109 | 10 | 53942336  | 53942336  | MC   | NONE                    | 53942336  | 0       | 4.24E-16 | 58       | 2  | MC | 4.24E-16  |          |
| 10-141 | 10 | 68747720  | 68747720  | MC   | NONE                    | 68747720  | 0       | 5.58E-34 | 70       | 2  | MC | 5.58E-34  |          |
| 10-164 | 10 | 75503268  | 75503268  | MC   | NONE                    | 75503268  | 0       | 2.17E-32 | 66       | 2  | MC | 2.17E-32  |          |
| 10-171 | 10 | 77116117  | 77116117  | MC   | NONE                    | 77116117  | 0       | 2.69E-08 | 33       | 2  | MC | 2.69E-08  |          |
| 10-177 | 10 | 82267770  | 82267770  | MC   | NONE                    | 82267770  | 0       | 1.84E-21 | 46       | 1  | MC | 1.84E-21  |          |
| 10-180 | 10 | 82986141  | 82986141  | MC   | NONE                    | 82986141  | 0       | 2.72E-38 | 67       | 0  | MC | 2.72E-38  |          |
| 10-184 | 10 | 83613667  | 83613667  | MC   | NONE                    | 83613667  | 0       | 2.49E-26 | 66       | 3  | MC | 2.49E-26  |          |
| 10-187 | 10 | 86085655  | 86085655  | MC   | NONE                    | 86085655  | 0       | 1.73E-23 | 50       | 2  | MC | 1.73E-23  |          |
| 10-196 | 10 | 90822941  | 90822941  | MC   | NONE                    | 90822941  | 0       | 2.23E-19 | 48       | 0  | MC | 2.23E-19  |          |
| 10-212 | 10 | 99999350  | 99999350  | MC   | NONE                    | 99999350  | 0       | 8.34E-13 | 40       | 1  | MC | 8.34E-13  |          |
| 10-228 | 10 | 105417348 | 105417348 | MC   | NONE                    | 105417348 | 0       | 3.77E-17 | 78       | 9  | MC | 3.77E-17  |          |
| 10-236 | 10 | 107285944 | 107285944 | MC   | NONE                    | 107285944 | 0       | 1.21E-39 | 67       | 0  | MC | 1.21E-39  |          |
| 10-254 | 10 | 110616713 | 110616713 | MC   | NONE                    | 110616713 | 0       | 7.25E-20 | 55       | 3  | MC | 7.25E-20  |          |
| 10-271 | 10 | 113788172 | 113788172 | MC   | NONE                    | 113788172 | 0       | 2.27E-32 | 60       | 2  | MC | 2.27E-32  |          |
| 10-286 | 10 | 116820853 | 116820853 | MC   | NONE                    | 116820853 | 0       | 3.02E-13 | 49       | 3  | MC | 3.02E-13  |          |
| 10-287 | 10 | 117048370 | 117048370 | MC   | NONE                    | 117048370 | 0       | 4.91E-22 | 51       | 1  | MC | 4.91E-22  |          |
| 10-294 | 10 | 118027267 | 118027267 | MC   | NONE                    | 118027267 | 0       | 1.15E-05 | 41       | 5  | MC | 1.15E-05  |          |
| 10-298 | 10 | 119336303 | 119336303 | MC   | NONE                    | 119336303 | 0       | 3.07E-18 | 47       | 2  | MC | 3.07E-18  |          |
| 10-307 | 10 | 127302197 | 127302197 | MC   | NONE                    | 127302197 | 0       | 2.42E-27 | 64       | 4  | MC | 2.42E-27  |          |
| 10-316 | 10 | 137084107 | 137084107 | MC   | NONE                    | 137084107 | 0       | 3.84E-10 | 17       | 0  | MC | 3.84E-10  |          |
| 1-7    | 1  | 2870915   | 2900564   | NONE | Extra sequence included | 2870915   | 2900564 | -5304    | 7.12E-23 | 90 | 63 | Extra seq | 7.12E-23 |



|       |   |           |           |      |                         |           |           |         |          |    |    |     |          |
|-------|---|-----------|-----------|------|-------------------------|-----------|-----------|---------|----------|----|----|-----|----------|
| 1-8   | 1 | 5093981   | 5223564   | NONE | Extra sequence included | 5093981   | 5223564   | -35231  | 7.12E-23 | 39 | 33 | DEL | 7.12E-23 |
| 1-11  | 1 | 5649835   | 5697275   | NONE | Extra sequence included | 5649835   | 5697275   | -9626   | 7.12E-23 | 72 | 55 | DEL | 7.12E-23 |
| 1-15  | 1 | 7962165   | 7994331   | NONE | Extra sequence included | 7962165   | 7994331   | -6937   | 7.12E-23 | 78 | 62 | DEL | 7.12E-23 |
| 1-20  | 1 | 8670170   | 8764224   | NONE | Extra sequence included | 8670170   | 8764224   | -14234  | 7.12E-23 | 50 | 41 | DEL | 7.12E-23 |
| 1-22  | 1 | 9036636   | 9173244   | NONE | Extra sequence included | 9036636   | 9173244   | -87932  | 1.01E-22 | 52 | 44 | DEL | 1.01E-22 |
| 1-25  | 1 | 9591313   | 9611714   | NONE | Extra sequence included | 9591313   | 9611714   | -20401  | 0.00E+00 | 80 | 0  | DEL | 0.00E+00 |
| 1-26  | 1 | 9642757   | 9660754   | NONE | Extra sequence included | 9642757   | 9660754   | -17997  | 0.00E+00 | 77 | 0  | DEL | 0.00E+00 |
| 1-35  | 1 | 11907037  | 11927693  | NONE | Extra sequence included | 11907037  | 11927693  | -6075   | 7.12E-23 | 80 | 54 | DEL | 7.12E-23 |
| 1-46  | 1 | 13398838  | 13468970  | NONE | Extra sequence included | 13398838  | 13468970  | -9808   | 7.12E-23 | 67 | 52 | DEL | 7.12E-23 |
| 1-49  | 1 | 13717079  | 13808138  | NONE | Extra sequence included | 13717079  | 13808138  | -17755  | 7.12E-23 | 58 | 44 | DEL | 7.12E-23 |
| 1-50  | 1 | 14034506  | 14095925  | NONE | Extra sequence included | 14034506  | 14095925  | -22880  | 1.01E-22 | 54 | 42 | DEL | 1.01E-22 |
| 1-51  | 1 | 14102372  | 14164884  | NONE | Extra sequence included | 14102372  | 14164884  | -8505   | 7.12E-23 | 55 | 48 | DEL | 7.12E-23 |
| 1-52  | 1 | 14208709  | 14262945  | NONE | Extra sequence included | 14208709  | 14262945  | -10505  | 7.12E-23 | 56 | 52 | DEL | 7.12E-23 |
| 1-57  | 1 | 14910821  | 14987214  | NONE | Extra sequence included | 14910821  | 14987214  | -15449  | 7.12E-23 | 78 | 63 | DEL | 7.12E-23 |
| 1-59  | 1 | 15707773  | 15742972  | NONE | Extra sequence included | 15707773  | 15742972  | -5578   | 7.12E-23 | 56 | 42 | DEL | 7.12E-23 |
| 1-64  | 1 | 16648258  | 16720228  | NONE | Extra sequence included | 16648258  | 16720228  | -12289  | 7.12E-23 | 31 | 24 | DEL | 7.12E-23 |
| 1-68  | 1 | 17469084  | 17532636  | NONE | Extra sequence included | 17469084  | 17532636  | -11908  | 1.01E-22 | 61 | 51 | DEL | 1.01E-22 |
| 1-70  | 1 | 17919754  | 17964088  | NONE | Extra sequence included | 17919754  | 17964088  | -8552   | 7.12E-23 | 70 | 47 | DEL | 7.12E-23 |
| 1-83  | 1 | 28950659  | 28970799  | NONE | Extra sequence included | 28950659  | 28970799  | -20140  | 0.00E+00 | 74 | 0  | DEL | 0.00E+00 |
| 1-87  | 1 | 31201889  | 31201889  | NONE | Extra sequence included | 31201889  | 31201889  | -12773  | 7.12E-23 | 43 | 32 | DEL | 7.12E-23 |
| 1-91  | 1 | 33564991  | 33627387  | NONE | Extra sequence included | 33564991  | 33627387  | -9204   | 7.12E-23 | 72 | 62 | DEL | 7.12E-23 |
| 1-100 | 1 | 36193013  | 36226149  | NONE | Extra sequence included | 36193013  | 36226149  | -33136  | 0.00E+00 | 56 | 0  | DEL | 0.00E+00 |
| 1-106 | 1 | 37237219  | 37267764  | NONE | Extra sequence included | 37237219  | 37267764  | -7154   | 7.12E-23 | 70 | 53 | DEL | 7.12E-23 |
| 1-113 | 1 | 44803842  | 44855666  | NONE | Extra sequence included | 44803842  | 44855666  | -5243   | 3.28E-15 | 53 | 36 | DEL | 3.28E-15 |
| 1-115 | 1 | 44883390  | 44949913  | NONE | Extra sequence included | 44883390  | 44949913  | -11532  | 7.12E-23 | 39 | 33 | DEL | 7.12E-23 |
| 1-118 | 1 | 46407270  | 46535110  | NONE | Extra sequence included | 46407270  | 46535110  | -18513  | 7.12E-23 | 24 | 24 | DEL | 7.12E-23 |
| 1-120 | 1 | 47077302  | 47095125  | NONE | Extra sequence included | 47077302  | 47095125  | -17823  | 0.00E+00 | 59 | 0  | DEL | 0.00E+00 |
| 1-123 | 1 | 50965166  | 51047441  | NONE | Extra sequence included | 50965166  | 51047441  | -8461   | 2.75E-16 | 48 | 35 | DEL | 2.75E-16 |
| 1-129 | 1 | 53886800  | 53912990  | NONE | Extra sequence included | 53886800  | 53912990  | -5665   | 7.12E-23 | 81 | 57 | DEL | 7.12E-23 |
| 1-130 | 1 | 54003687  | 54053237  | NONE | Extra sequence included | 54003687  | 54053237  | -7429   | 7.12E-23 | 75 | 60 | DEL | 7.12E-23 |
| 1-135 | 1 | 55566550  | 55648111  | NONE | Extra sequence included | 55566550  | 55648111  | -10553  | 7.12E-23 | 47 | 38 | DEL | 7.12E-23 |
| 1-145 | 1 | 57558951  | 57635411  | NONE | Extra sequence included | 57558951  | 57635411  | -34460  | 1.01E-22 | 45 | 30 | DEL | 1.01E-22 |
| 1-149 | 1 | 58054322  | 58106541  | NONE | Extra sequence included | 58054322  | 58106541  | -5970   | 7.12E-23 | 81 | 54 | DEL | 7.12E-23 |
| 1-150 | 1 | 58289840  | 58320669  | NONE | Extra sequence included | 58289840  | 58320669  | -30829  | 0.00E+00 | 68 | 0  | DEL | 0.00E+00 |
| 1-152 | 1 | 58414699  | 58444879  | NONE | Extra sequence included | 58414699  | 58444879  | -8928   | 7.12E-23 | 64 | 58 | DEL | 7.12E-23 |
| 1-159 | 1 | 59744180  | 59771453  | NONE | Extra sequence included | 59744180  | 59771453  | -5090   | 7.12E-23 | 73 | 55 | DEL | 7.12E-23 |
| 1-166 | 1 | 61447972  | 61496726  | NONE | Extra sequence included | 61447972  | 61496726  | -13814  | 7.12E-23 | 64 | 47 | DEL | 7.12E-23 |
| 1-171 | 1 | 62406119  | 62454313  | NONE | Extra sequence included | 62406119  | 62454313  | -13454  | 7.12E-23 | 54 | 47 | DEL | 7.12E-23 |
| 1-177 | 1 | 63769045  | 63867831  | NONE | Extra sequence included | 63769045  | 63867831  | -36352  | 7.12E-23 | 61 | 53 | DEL | 7.12E-23 |
| 1-179 | 1 | 63999948  | 64051089  | NONE | Extra sequence included | 63999948  | 64051089  | -51141  | 0.00E+00 | 67 | 0  | DEL | 0.00E+00 |
| 1-181 | 1 | 64859590  | 64892897  | NONE | Extra sequence included | 64859590  | 64892897  | -5897   | 7.12E-23 | 66 | 62 | DEL | 7.12E-23 |
| 1-186 | 1 | 68091250  | 68129713  | NONE | Extra sequence included | 68091250  | 68129713  | -13831  | 7.12E-23 | 87 | 61 | DEL | 7.12E-23 |
| 1-192 | 1 | 71641767  | 71710605  | NONE | Extra sequence included | 71641767  | 71710605  | -8136   | 8.84E-18 | 40 | 30 | DEL | 8.84E-18 |
| 1-201 | 1 | 74325423  | 74347342  | NONE | Extra sequence included | 74325423  | 74347342  | -5531   | 7.12E-23 | 98 | 84 | DEL | 7.12E-23 |
| 1-214 | 1 | 77548234  | 77597704  | NONE | Extra sequence included | 77548234  | 77597704  | -16933  | 7.12E-23 | 52 | 33 | DEL | 7.12E-23 |
| 1-218 | 1 | 79617814  | 79633967  | NONE | Extra sequence included | 79617814  | 79633967  | -16153  | 0.00E+00 | 89 | 0  | DEL | 0.00E+00 |
| 1-247 | 1 | 88255131  | 88276336  | NONE | Extra sequence included | 88255131  | 88276336  | -21205  | 0.00E+00 | 47 | 0  | DEL | 0.00E+00 |
| 1-268 | 1 | 93822092  | 93942011  | NONE | Extra sequence included | 93822092  | 93942011  | -119919 | 0.00E+00 | 74 | 0  | DEL | 0.00E+00 |
| 1-274 | 1 | 95912909  | 96002277  | NONE | Extra sequence included | 95912909  | 96002277  | -20270  | 1.01E-22 | 47 | 29 | DEL | 1.01E-22 |
| 1-275 | 1 | 96103781  | 96155426  | NONE | Extra sequence included | 96103781  | 96155426  | -5222   | 1.45E-15 | 42 | 37 | DEL | 1.45E-15 |
| 1-295 | 1 | 102848919 | 102893366 | NONE | Extra sequence included | 102848919 | 102893366 | -9084   | 7.12E-23 | 15 | 15 | DEL | 7.12E-23 |
| 1-298 | 1 | 103394813 | 103455669 | NONE | Extra sequence included | 103394813 | 103455669 | -45976  | 1.01E-22 | 57 | 48 | DEL | 1.01E-22 |
| 1-302 | 1 | 104210212 | 104260119 | NONE | Extra sequence included | 104210212 | 104260119 | -5475   | 7.12E-23 | 72 | 54 | DEL | 7.12E-23 |
| 1-303 | 1 | 104369918 | 104415377 | NONE | Extra sequence included | 104369918 | 104415377 | -18984  | 7.12E-23 | 72 | 53 | DEL | 7.12E-23 |
| 1-305 | 1 | 104590035 | 104677798 | NONE | Extra sequence included | 104590035 | 104677798 | -19726  | 9.90E-23 | 63 | 50 | DEL | 9.90E-23 |
| 1-308 | 1 | 105077409 | 105104761 | NONE | Extra sequence included | 105077409 | 105104761 | -27352  | 0.00E+00 | 63 | 0  | DEL | 0.00E+00 |
| 1-313 | 1 | 105751199 | 105777451 | NONE | Extra sequence included | 105751199 | 105777451 | -7125   | 7.12E-23 | 63 | 52 | DEL | 7.12E-23 |
| 1-318 | 1 | 108027670 | 108059223 | NONE | Extra sequence included | 108027670 | 108059223 | -6007   | 7.12E-23 | 46 | 37 | DEL | 7.12E-23 |
| 1-326 | 1 | 110033319 | 110066208 | NONE | Extra sequence included | 110033319 | 110066208 | -6775   | 7.12E-23 | 47 | 39 | DEL | 7.12E-23 |
| 1-328 | 1 | 110279081 | 110335183 | NONE | Extra sequence included | 110279081 | 110335183 | -9064   | 7.12E-23 | 67 | 49 | DEL | 7.12E-23 |
| 1-333 | 1 | 110754459 | 110810371 | NONE | Extra sequence included | 110754459 | 110810371 | -14630  | 7.12E-23 | 38 | 34 | DEL | 7.12E-23 |
| 1-334 | 1 | 111173896 | 111226968 | NONE | Extra sequence included | 111173896 | 111226968 | -21516  | 1.00E-22 | 56 | 49 | DEL | 1.00E-22 |
| 1-344 | 1 | 112684678 | 112695631 | NONE | Extra sequence included | 112684678 | 112695631 | -10953  | 0.00E+00 | 50 | 0  | DEL | 0.00E+00 |
| 1-345 | 1 | 112721822 | 112792318 | NONE | Extra sequence included | 112721822 | 112792318 | -25414  | 7.12E-23 | 39 | 31 | DEL | 7.12E-23 |
| 1-363 | 1 | 118933868 | 118959767 | NONE | Extra sequence included | 118933868 | 118959767 | -25899  | 0.00E+00 | 44 | 0  | DEL | 0.00E+00 |
| 1-371 | 1 | 121184318 | 121239338 | NONE | Extra sequence included | 121184318 | 121239338 | -6475   | 5.01E-17 | 41 | 30 | DEL | 5.01E-17 |
| 1-372 | 1 | 121480323 | 121622120 | NONE | Extra sequence included | 121480323 | 121622120 | -24562  | 9.92E-23 | 42 | 29 | DEL | 9.92E-23 |
| 1-388 | 1 | 126674915 | 126709526 | NONE | Extra sequence included | 126674915 | 126709526 | -5335   | 7.12E-23 | 82 | 69 | DEL | 7.12E-23 |
| 1-389 | 1 | 126828766 | 126835029 | NONE | Extra sequence included | 126828766 | 126835029 | -6263   | 0.00E+00 | 70 | 0  | DEL | 0.00E+00 |
| 1-391 | 1 | 126958203 | 127017834 | NONE | Extra sequence included | 126958203 | 127017834 | -59631  | 0.00E+00 | 48 | 0  | DEL | 0.00E+00 |
| 1-400 | 1 | 130545432 | 130595558 | NONE | Extra sequence included | 130545432 | 130595558 | -20841  | 7.12E-23 | 64 | 44 | DEL | 7.12E-23 |
| 1-404 | 1 | 131297955 | 131356285 | NONE | Extra sequence included | 131297955 | 131356285 | -9942   | 1.46E-20 | 33 | 17 | DEL | 1.46E-20 |
| 1-413 | 1 | 137701190 | 137717159 | NONE | Extra sequence included | 137701190 | 137717159 | -15969  | 0.00E+00 | 56 | 0  | DEL | 0.00E+00 |
| 1-415 | 1 | 139266483 | 139301792 | NONE | Extra sequence included | 139266483 | 139301792 | -13135  | 1.01E-22 | 60 | 46 | DEL | 1.01E-22 |
| 1-418 | 1 | 140373047 | 140386612 | NONE | Extra sequence included | 140373047 | 140386612 | -13565  | 0.00E+00 | 66 | 0  | DEL | 0.00E+00 |
| 1-419 | 1 | 140820110 | 140837730 | NONE | Extra sequence included | 140820110 | 140837730 | -17620  | 0.00E+00 | 68 | 0  | DEL | 0.00E+00 |
| 1-424 | 1 | 141647883 | 141667511 | NONE | Extra sequence included | 141647883 | 141667511 | -19628  | 0.00E+00 | 29 | 0  | DEL | 0.00E+00 |
| 1-428 | 1 | 142620365 | 142730454 | NONE | Extra sequence included | 142620365 | 142730454 | -31102  | 7.12E-23 | 27 | 21 | DEL | 7.12E-23 |
| 1-437 | 1 | 145509220 | 145612798 | NONE | Extra sequence included | 145509220 | 145612798 | -7353   | 2.97E-07 | 39 | 29 | DEL | 2.97E-07 |
| 1-449 | 1 | 154128997 | 154163930 | NONE | Extra sequence included | 154128997 | 154163930 | -5132   | 7.12E-23 | 77 | 55 | DEL | 7.12E-23 |
| 1-456 | 1 | 155835038 | 155855420 | NONE | Extra sequence included | 155835038 | 155855420 | -20382  | 0.00E+00 | 65 | 0  | DEL | 0.00E+00 |
| 1-472 | 1 | 159803708 | 159810436 | NONE | Extra sequence included | 159803708 | 159810436 | -6728   | 0.00E+00 | 59 | 0  | DEL | 0.00E+00 |
| 1-473 | 1 | 159937956 | 160001042 | NONE | Extra sequence included | 159937956 | 160001042 | -6869   | 7.72E-22 | 50 | 44 | DEL | 7.72E-22 |
| 1-492 | 1 | 164134625 | 164229972 | NONE | Extra sequence included | 164134625 | 164229972 | -14268  | 7.12E-23 | 42 | 41 | DEL | 7.12E-23 |
| 1-499 | 1 | 165889823 | 165906350 | NONE | Extra sequence included | 165889823 | 165906350 | -16527  | 0.00E+00 | 91 | 0  | DEL | 0.00E+00 |
| 1-503 | 1 | 166580255 | 166702431 | NONE | Extra sequence included | 166580255 | 166702431 | -19060  | 7.12E-23 | 51 | 45 | DEL | 7.12E-23 |
| 1-505 |   |           |           |      |                         |           |           |         |          |    |    |     |          |

|       |   |           |           |      |                         |           |           |        |          |    |    |     |          |
|-------|---|-----------|-----------|------|-------------------------|-----------|-----------|--------|----------|----|----|-----|----------|
| 1-560 | 1 | 186933843 | 187020026 | NONE | Extra sequence included | 186933843 | 187020026 | -32147 | 9.76E-23 | 22 | 15 | DEL | 9.76E-23 |
| 1-571 | 1 | 194251740 | 194287472 | NONE | Extra sequence included | 194251740 | 194287472 | -5906  | 7.12E-23 | 43 | 34 | DEL | 7.12E-23 |
| 1-580 | 1 | 195839082 | 195907820 | NONE | Extra sequence included | 195839082 | 195907820 | -9184  | 7.12E-23 | 59 | 38 | DEL | 7.12E-23 |
| 1-586 | 1 | 197133521 | 197185660 | NONE | Extra sequence included | 197133521 | 197185660 | -6981  | 7.12E-23 | 72 | 57 | DEL | 7.12E-23 |
| 1-592 | 1 | 198410064 | 198528623 | NONE | Extra sequence included | 198410064 | 198528623 | -22037 | 7.12E-23 | 26 | 21 | DEL | 7.12E-23 |
| 1-604 | 1 | 205677080 | 205727515 | NONE | Extra sequence included | 205677080 | 205727515 | -7753  | 7.12E-23 | 64 | 39 | DEL | 7.12E-23 |
| 1-605 | 1 | 206008404 | 206084449 | NONE | Extra sequence included | 206008404 | 206084449 | -9059  | 7.72E-22 | 64 | 36 | DEL | 7.72E-22 |
| 1-625 | 1 | 211330050 | 211351585 | NONE | Extra sequence included | 211330050 | 211351585 | -21535 | 0.00E+00 | 95 | 0  | DEL | 0.00E+00 |
| 1-626 | 1 | 211388124 | 211405016 | NONE | Extra sequence included | 211388124 | 211405016 | -16892 | 0.00E+00 | 90 | 0  | DEL | 0.00E+00 |
| 1-652 | 1 | 219762217 | 219800257 | NONE | Extra sequence included | 219762217 | 219800257 | -9541  | 7.12E-23 | 48 | 35 | DEL | 7.12E-23 |
| 1-662 | 1 | 224044564 | 224092873 | NONE | Extra sequence included | 224044564 | 224092873 | -5811  | 7.12E-23 | 60 | 47 | DEL | 7.12E-23 |
| 1-665 | 1 | 224748719 | 224798467 | NONE | Extra sequence included | 224748719 | 224798467 | -6664  | 7.12E-23 | 60 | 55 | DEL | 7.12E-23 |
| 1-676 | 1 | 227578641 | 227592439 | NONE | Extra sequence included | 227578641 | 227592439 | -13798 | 0.00E+00 | 80 | 0  | DEL | 0.00E+00 |
| 1-688 | 1 | 231171314 | 231212067 | NONE | Extra sequence included | 231171314 | 231212067 | -14023 | 9.96E-23 | 74 | 63 | DEL | 9.96E-23 |
| 1-689 | 1 | 231396141 | 231433420 | NONE | Extra sequence included | 231396141 | 231433420 | -13023 | 7.12E-23 | 83 | 62 | DEL | 7.12E-23 |
| 1-690 | 1 | 231470291 | 231490339 | NONE | Extra sequence included | 231470291 | 231490339 | -5230  | 7.12E-23 | 71 | 49 | DEL | 7.12E-23 |
| 1-723 | 1 | 246860019 | 246950602 | NONE | Extra sequence included | 246860019 | 246950602 | -20193 | 7.12E-23 | 74 | 51 | DEL | 7.12E-23 |
| 1-725 | 1 | 247318034 | 247372742 | NONE | Extra sequence included | 247318034 | 247372742 | -54708 | 0.00E+00 | 86 | 0  | DEL | 0.00E+00 |
| 1-748 | 1 | 260794833 | 260861409 | NONE | Extra sequence included | 260794833 | 260861409 | -20743 | 7.12E-23 | 35 | 29 | DEL | 7.12E-23 |
| 1-755 | 1 | 265462378 | 265542107 | NONE | Extra sequence included | 265462378 | 265542107 | -79729 | 0.00E+00 | 70 | 0  | DEL | 0.00E+00 |
| 1-760 | 1 | 267430985 | 267477916 | NONE | Extra sequence included | 267430985 | 267477916 | -6255  | 7.12E-23 | 69 | 51 | DEL | 7.12E-23 |
| 1-761 | 1 | 267512883 | 267547122 | NONE | Extra sequence included | 267512883 | 267547122 | -6427  | 7.12E-23 | 74 | 56 | DEL | 7.12E-23 |
| 1-763 | 1 | 267698701 | 267775310 | NONE | Extra sequence included | 267698701 | 267775310 | -9735  | 7.12E-23 | 77 | 61 | DEL | 7.12E-23 |
| 1-764 | 1 | 267962675 | 267982885 | NONE | Extra sequence included | 267962675 | 267982885 | -8158  | 7.12E-23 | 89 | 59 | DEL | 7.12E-23 |
| 1-767 | 1 | 270713496 | 270770033 | NONE | Extra sequence included | 270713496 | 270770033 | -7153  | 7.12E-23 | 68 | 53 | DEL | 7.12E-23 |
| 1-777 | 1 | 273433614 | 273445300 | NONE | Extra sequence included | 273433614 | 273445300 | -11686 | 0.00E+00 | 58 | 0  | DEL | 0.00E+00 |
| 1-780 | 1 | 273956824 | 273985322 | NONE | Extra sequence included | 273956824 | 273985322 | -5068  | 7.12E-23 | 62 | 51 | DEL | 7.12E-23 |
| 1-782 | 1 | 275636343 | 275721134 | NONE | Extra sequence included | 275636343 | 275721134 | -9682  | 1.63E-14 | 31 | 25 | DEL | 1.63E-14 |
| 1-783 | 1 | 278083330 | 278115542 | NONE | Extra sequence included | 278083330 | 278115542 | -6295  | 7.12E-23 | 64 | 49 | DEL | 7.12E-23 |
| 1-787 | 1 | 283277674 | 283307829 | NONE | Extra sequence included | 283277674 | 283307829 | -10719 | 7.12E-23 | 83 | 67 | DEL | 7.12E-23 |
| 1-800 | 1 | 289208920 | 289247331 | NONE | Extra sequence included | 289208920 | 289247331 | -12452 | 7.12E-23 | 80 | 62 | DEL | 7.12E-23 |
| 1-802 | 1 | 289723541 | 289739179 | NONE | Extra sequence included | 289723541 | 289739179 | -15638 | 0.00E+00 | 82 | 0  | DEL | 0.00E+00 |
| 1-808 | 1 | 291118290 | 291178231 | NONE | Extra sequence included | 291118290 | 291178231 | -59941 | 0.00E+00 | 89 | 0  | DEL | 0.00E+00 |
| 2-7   | 2 | 5277877   | 5357398   | NONE | Extra sequence included | 5277877   | 5357398   | -36288 | 9.89E-23 | 63 | 49 | DEL | 9.89E-23 |
| 2-28  | 2 | 16187154  | 16197907  | NONE | Extra sequence included | 16187154  | 16197907  | -10753 | 0.00E+00 | 65 | 0  | DEL | 0.00E+00 |
| 2-29  | 2 | 16428574  | 16509732  | NONE | Extra sequence included | 16428574  | 16509732  | -81158 | 0.00E+00 | 59 | 0  | DEL | 0.00E+00 |
| 2-43  | 2 | 20229274  | 20267925  | NONE | Extra sequence included | 20229274  | 20267925  | -6291  | 7.27E-23 | 45 | 41 | DEL | 7.27E-23 |
| 2-56  | 2 | 23874181  | 23914291  | NONE | Extra sequence included | 23874181  | 23914291  | -8593  | 7.27E-23 | 57 | 47 | DEL | 7.27E-23 |
| 2-58  | 2 | 24242644  | 24283718  | NONE | Extra sequence included | 24242644  | 24283718  | -41074 | 0.00E+00 | 63 | 0  | DEL | 0.00E+00 |
| 2-66  | 2 | 26579653  | 26616937  | NONE | Extra sequence included | 26579653  | 26616937  | -9167  | 7.27E-23 | 59 | 49 | DEL | 7.27E-23 |
| 2-70  | 2 | 27458674  | 27563602  | NONE | Extra sequence included | 27458674  | 27563602  | -17660 | 7.27E-23 | 50 | 39 | DEL | 7.27E-23 |
| 2-92  | 2 | 36572633  | 36597224  | NONE | Extra sequence included | 36572633  | 36597224  | -7969  | 7.27E-23 | 48 | 38 | DEL | 7.27E-23 |
| 2-109 | 2 | 44897038  | 44982266  | NONE | Extra sequence included | 44897038  | 44982266  | -25343 | 9.78E-23 | 53 | 36 | DEL | 9.78E-23 |
| 2-127 | 2 | 48415158  | 48511406  | NONE | Extra sequence included | 48415158  | 48511406  | -10691 | 2.19E-17 | 36 | 31 | DEL | 2.19E-17 |
| 2-141 | 2 | 54209380  | 54266604  | NONE | Extra sequence included | 54209380  | 54266604  | -7295  | 7.27E-23 | 52 | 41 | DEL | 7.27E-23 |
| 2-143 | 2 | 57808859  | 57834550  | NONE | Extra sequence included | 57808859  | 57834550  | -7690  | 7.27E-23 | 76 | 51 | DEL | 7.27E-23 |
| 2-165 | 2 | 67401526  | 67442866  | NONE | Extra sequence included | 67401526  | 67442866  | -12401 | 7.27E-23 | 93 | 70 | DEL | 7.27E-23 |
| 2-167 | 2 | 67693641  | 67729820  | NONE | Extra sequence included | 67693641  | 67729820  | -5966  | 7.27E-23 | 90 | 63 | DEL | 7.27E-23 |
| 2-178 | 2 | 70084652  | 70098110  | NONE | Extra sequence included | 70084652  | 70098110  | -13458 | 0.00E+00 | 70 | 0  | DEL | 0.00E+00 |
| 2-180 | 2 | 70426411  | 70499468  | NONE | Extra sequence included | 70426411  | 70499468  | -13131 | 7.27E-23 | 74 | 60 | DEL | 7.27E-23 |
| 2-187 | 2 | 72422442  | 72545382  | NONE | Extra sequence included | 72422442  | 72545382  | -72111 | 9.48E-23 | 70 | 62 | DEL | 9.48E-23 |
| 2-205 | 2 | 79143731  | 79237392  | NONE | Extra sequence included | 79143731  | 79237392  | -24875 | 7.27E-23 | 39 | 34 | DEL | 7.27E-23 |
| 2-208 | 2 | 80501077  | 80553095  | NONE | Extra sequence included | 80501077  | 80553095  | -13670 | 7.27E-23 | 50 | 45 | DEL | 7.27E-23 |
| 2-215 | 2 | 82335773  | 82411641  | NONE | Extra sequence included | 82335773  | 82411641  | -11190 | 7.27E-23 | 43 | 35 | DEL | 7.27E-23 |
| 2-216 | 2 | 82916205  | 82946965  | NONE | Extra sequence included | 82916205  | 82946965  | -5721  | 7.27E-23 | 50 | 42 | DEL | 7.27E-23 |
| 2-217 | 2 | 83393551  | 83447455  | NONE | Extra sequence included | 83393551  | 83447455  | -53904 | 0.00E+00 | 57 | 0  | DEL | 0.00E+00 |
| 2-221 | 2 | 84804980  | 84888309  | NONE | Extra sequence included | 84804980  | 84888309  | -11523 | 7.27E-23 | 41 | 29 | DEL | 7.27E-23 |
| 2-225 | 2 | 86249102  | 86285060  | NONE | Extra sequence included | 86249102  | 86285060  | -6525  | 7.27E-23 | 39 | 31 | DEL | 7.27E-23 |
| 2-242 | 2 | 93521443  | 93564971  | NONE | Extra sequence included | 93521443  | 93564971  | -6010  | 7.27E-23 | 55 | 44 | DEL | 7.27E-23 |
| 2-251 | 2 | 96537932  | 96598599  | NONE | Extra sequence included | 96537932  | 96598599  | -13644 | 9.89E-23 | 61 | 49 | DEL | 9.89E-23 |
| 2-252 | 2 | 96608228  | 96651000  | NONE | Extra sequence included | 96608228  | 96651000  | -9658  | 7.27E-23 | 59 | 44 | DEL | 7.27E-23 |
| 2-265 | 2 | 99804189  | 99882008  | NONE | Extra sequence included | 99804189  | 99882008  | -25267 | 7.27E-23 | 69 | 51 | DEL | 7.27E-23 |
| 2-283 | 2 | 189794063 | 189794063 | NONE | Extra sequence included | 189794063 | 189794063 | -7272  | 7.27E-23 | 60 | 48 | DEL | 7.27E-23 |
| 2-285 | 2 | 196502089 | 196517494 | NONE | Extra sequence included | 196502089 | 196517494 | -15405 | 0.00E+00 | 59 | 0  | DEL | 0.00E+00 |
| 2-294 | 2 | 203038680 | 203098513 | NONE | Extra sequence included | 203038680 | 203098513 | -12383 | 7.27E-23 | 34 | 23 | DEL | 7.27E-23 |
| 2-297 | 2 | 203674301 | 203683246 | NONE | Extra sequence included | 203674301 | 203683246 | -8945  | 0.00E+00 | 85 | 0  | DEL | 0.00E+00 |
| 2-302 | 2 | 207725143 | 207760636 | NONE | Extra sequence included | 207725143 | 207760636 | -8654  | 7.27E-23 | 51 | 39 | DEL | 7.27E-23 |
| 2-306 | 2 | 208733648 | 208824817 | NONE | Extra sequence included | 208733648 | 208824817 | -25525 | 7.27E-23 | 39 | 30 | DEL | 7.27E-23 |
| 2-310 | 2 | 209622991 | 209698457 | NONE | Extra sequence included | 209622991 | 209698457 | -14683 | 7.27E-23 | 70 | 48 | DEL | 7.27E-23 |
| 2-318 | 2 | 212471399 | 212500175 | NONE | Extra sequence included | 212471399 | 212500175 | -7517  | 7.27E-23 | 68 | 50 | DEL | 7.27E-23 |
| 2-321 | 2 | 216668720 | 216708106 | NONE | Extra sequence included | 216668720 | 216708106 | -39386 | 0.00E+00 | 61 | 0  | DEL | 0.00E+00 |
| 2-323 | 2 | 216908989 | 216953458 | NONE | Extra sequence included | 216908989 | 216953458 | -8367  | 7.27E-23 | 76 | 61 | DEL | 7.27E-23 |
| 2-334 | 2 | 220977117 | 220992107 | NONE | Extra sequence included | 220977117 | 220992107 | -14990 | 0.00E+00 | 51 | 0  | DEL | 0.00E+00 |
| 2-335 | 2 | 221124130 | 221144168 | NONE | Extra sequence included | 221124130 | 221144168 | -6510  | 7.27E-23 | 58 | 43 | DEL | 7.27E-23 |
| 2-339 | 2 | 223146493 | 223232865 | NONE | Extra sequence included | 223146493 | 223232865 | -9236  | 2.85E-16 | 43 | 32 | DEL | 2.85E-16 |
| 2-343 | 2 | 226913070 | 226946297 | NONE | Extra sequence included | 226913070 | 226946297 | -9029  | 7.27E-23 | 82 | 67 | DEL | 7.27E-23 |
| 2-348 | 2 | 229031914 | 229053679 | NONE | Extra sequence included | 229031914 | 229053679 | -5684  | 7.27E-23 | 87 | 37 | DEL | 7.27E-23 |
| 2-353 | 2 | 230474746 | 230536281 | NONE | Extra sequence included | 230474746 | 230536281 | -14513 | 7.27E-23 | 37 | 35 | DEL | 7.27E-23 |
| 2-355 | 2 | 230757787 | 230786594 | NONE | Extra sequence included | 230757787 | 230786594 | -8131  | 7.27E-23 | 39 | 30 | DEL | 7.27E-23 |
| 3-12  | 3 | 12305816  | 12346981  | NONE | Extra sequence included | 12305816  | 12346981  | -5999  | 7.24E-23 | 72 | 54 | DEL | 7.24E-23 |
| 3-23  | 3 | 25311610  | 25442105  | NONE | Extra sequence included | 25311610  | 25442105  | -36463 | 7.24E-23 | 38 | 28 | DEL | 7.24E-23 |
| 3-33  | 3 | 28358570  | 28413919  | NONE | Extra sequence included | 28358570  | 28413919  | -55349 | 0.00E+00 | 77 | 0  | DEL | 0.00E+00 |
| 3-38  | 3 | 29466356  | 29468000  | NONE | Extra sequence included | 29466356  | 29468000  | -15792 | 1.08E-22 | 69 | 54 | DEL | 1.08E-22 |
| 3-43  | 3 | 31062604  | 31109943  | NONE | Extra sequence included | 31062604  | 31109943  | -5100  | 4.07E-08 | 20 | 17 | DEL | 4.07E-08 |
| 3-46  | 3 | 31621250  | 31688683  | NONE | Extra sequence included | 31621250  | 31688683  | -15464 | 7.24E-23 | 27 | 23 | DEL | 7.24E-23 |
| 3-57  | 3 | 34961201  | 35019280  | NONE | Extra sequence included | 34961201  |           |        |          |    |    |     |          |

|       |   |           |           |      |                         |           |           |         |          |    |    |     |          |
|-------|---|-----------|-----------|------|-------------------------|-----------|-----------|---------|----------|----|----|-----|----------|
| 3-90  | 3 | 42556109  | 42584982  | NONE | Extra sequence included | 42556109  | 42584982  | -7818   | 7.24E-23 | 38 | 31 | DEL | 7.24E-23 |
| 3-110 | 3 | 47400209  | 47434679  | NONE | Extra sequence included | 47400209  | 47434679  | -9534   | 7.24E-23 | 56 | 50 | DEL | 7.24E-23 |
| 3-114 | 3 | 48710686  | 48756137  | NONE | Extra sequence included | 48710686  | 48756137  | -12525  | 7.24E-23 | 41 | 31 | DEL | 7.24E-23 |
| 3-127 | 3 | 51895275  | 51962850  | NONE | Extra sequence included | 51895275  | 51962850  | -14059  | 7.24E-23 | 59 | 52 | DEL | 7.24E-23 |
| 3-131 | 3 | 53130095  | 53155595  | NONE | Extra sequence included | 53130095  | 53155595  | -7243   | 7.24E-23 | 55 | 38 | DEL | 7.24E-23 |
| 3-135 | 3 | 54253523  | 54283330  | NONE | Extra sequence included | 54253523  | 54283330  | -29807  | 0.00E+00 | 66 | 0  | DEL | 0.00E+00 |
| 3-142 | 3 | 56795594  | 56822454  | NONE | Extra sequence included | 56795594  | 56822454  | -26860  | 0.00E+00 | 46 | 0  | DEL | 0.00E+00 |
| 3-145 | 3 | 57504186  | 57595682  | NONE | Extra sequence included | 57504186  | 57595682  | -18541  | 1.07E-22 | 47 | 37 | DEL | 1.07E-22 |
| 3-158 | 3 | 64234299  | 64300989  | NONE | Extra sequence included | 64234299  | 64300989  | -66690  | 0.00E+00 | 28 | 0  | DEL | 0.00E+00 |
| 3-159 | 3 | 64551172  | 64602633  | NONE | Extra sequence included | 64551172  | 64602633  | -10710  | 7.24E-23 | 31 | 28 | DEL | 7.24E-23 |
| 3-165 | 3 | 65955051  | 66029490  | NONE | Extra sequence included | 65955051  | 66029490  | -8866   | 7.24E-23 | 68 | 55 | DEL | 7.24E-23 |
| 3-180 | 3 | 75912409  | 75987143  | NONE | Extra sequence included | 75912409  | 75987143  | -11543  | 7.24E-23 | 49 | 36 | DEL | 7.24E-23 |
| 3-183 | 3 | 76865175  | 76900469  | NONE | Extra sequence included | 76865175  | 76900469  | -10806  | 7.24E-23 | 55 | 37 | DEL | 7.24E-23 |
| 3-185 | 3 | 77287286  | 77384848  | NONE | Extra sequence included | 77287286  | 77384848  | -22621  | 7.24E-23 | 36 | 32 | DEL | 7.24E-23 |
| 3-191 | 3 | 78628510  | 78737132  | NONE | Extra sequence included | 78628510  | 78737132  | -13830  | 7.24E-23 | 49 | 36 | DEL | 7.24E-23 |
| 3-192 | 3 | 78977725  | 79055752  | NONE | Extra sequence included | 78977725  | 79055752  | -11219  | 7.24E-23 | 57 | 44 | DEL | 7.24E-23 |
| 3-198 | 3 | 80196996  | 80266465  | NONE | Extra sequence included | 80196996  | 80266465  | -9902   | 2.68E-16 | 30 | 20 | DEL | 2.68E-16 |
| 3-199 | 3 | 80489161  | 80558342  | NONE | Extra sequence included | 80489161  | 80558342  | -12600  | 7.24E-23 | 27 | 19 | DEL | 7.24E-23 |
| 3-206 | 3 | 83343750  | 83506439  | NONE | Extra sequence included | 83343750  | 83506439  | -18825  | 7.24E-23 | 40 | 27 | DEL | 7.24E-23 |
| 3-212 | 3 | 85643383  | 85670032  | NONE | Extra sequence included | 85643383  | 85670032  | -5120   | 7.24E-23 | 61 | 43 | DEL | 7.24E-23 |
| 3-217 | 3 | 87813737  | 87945650  | NONE | Extra sequence included | 87813737  | 87945650  | -22340  | 7.24E-23 | 27 | 24 | DEL | 7.24E-23 |
| 3-218 | 3 | 88072974  | 88139166  | NONE | Extra sequence included | 88072974  | 88139166  | -16242  | 7.24E-23 | 28 | 22 | DEL | 7.24E-23 |
| 3-226 | 3 | 91821298  | 91840294  | NONE | Extra sequence included | 91821298  | 91840294  | -8214   | 7.24E-23 | 55 | 48 | DEL | 7.24E-23 |
| 3-242 | 3 | 101451070 | 101606418 | NONE | Extra sequence included | 101451070 | 101606418 | -40022  | 7.24E-23 | 28 | 17 | DEL | 7.24E-23 |
| 3-251 | 3 | 103391810 | 103472919 | NONE | Extra sequence included | 103391810 | 103472919 | -18707  | 1.06E-22 | 41 | 30 | DEL | 1.06E-22 |
| 3-258 | 3 | 105672639 | 105705585 | NONE | Extra sequence included | 105672639 | 105705585 | -12358  | 7.24E-23 | 55 | 33 | DEL | 7.24E-23 |
| 3-271 | 3 | 112398583 | 112445540 | NONE | Extra sequence included | 112398583 | 112445540 | -5153   | 6.17E-16 | 41 | 35 | DEL | 6.17E-16 |
| 3-273 | 3 | 112671699 | 112712289 | NONE | Extra sequence included | 112671699 | 112712289 | -5144   | 7.24E-23 | 60 | 45 | DEL | 7.24E-23 |
| 3-274 | 3 | 112983563 | 113051758 | NONE | Extra sequence included | 112983563 | 113051758 | -14155  | 7.24E-23 | 72 | 63 | DEL | 7.24E-23 |
| 3-279 | 3 | 114912673 | 114953515 | NONE | Extra sequence included | 114912673 | 114953515 | -40842  | 0.00E+00 | 20 | 0  | DEL | 0.00E+00 |
| 3-298 | 3 | 126626949 | 126676058 | NONE | Extra sequence included | 126626949 | 126676058 | -49109  | 0.00E+00 | 77 | 0  | DEL | 0.00E+00 |
| 3-300 | 3 | 127419524 | 127486865 | NONE | Extra sequence included | 127419524 | 127486865 | -8741   | 6.98E-15 | 33 | 22 | DEL | 6.98E-15 |
| 3-301 | 3 | 130847390 | 130863131 | NONE | Extra sequence included | 130847390 | 130863131 | -15741  | 0.00E+00 | 55 | 0  | DEL | 0.00E+00 |
| 3-303 | 3 | 131086347 | 131150062 | NONE | Extra sequence included | 131086347 | 131150062 | -9957   | 7.24E-23 | 54 | 36 | DEL | 7.24E-23 |
| 3-307 | 3 | 132091336 | 132130662 | NONE | Extra sequence included | 132091336 | 132130662 | -5145   | 7.24E-23 | 65 | 52 | DEL | 7.24E-23 |
| 3-311 | 3 | 135804426 | 135891454 | NONE | Extra sequence included | 135804426 | 135891454 | -26375  | 7.24E-23 | 66 | 59 | DEL | 7.24E-23 |
| 3-321 | 3 | 137980524 | 138021025 | NONE | Extra sequence included | 137980524 | 138021025 | -11038  | 7.24E-23 | 60 | 43 | DEL | 7.24E-23 |
| 3-326 | 3 | 139273036 | 139289239 | NONE | Extra sequence included | 139273036 | 139289239 | -6572   | 7.24E-23 | 54 | 55 | DEL | 7.24E-23 |
| 3-348 | 3 | 145341261 | 145397770 | NONE | Extra sequence included | 145341261 | 145397770 | -5802   | 9.06E-11 | 27 | 25 | DEL | 9.06E-11 |
| 3-349 | 3 | 147046539 | 147056683 | NONE | Extra sequence included | 147046539 | 147056683 | -5473   | 1.06E-22 | 48 | 31 | DEL | 1.06E-22 |
| 3-351 | 3 | 147239596 | 147284958 | NONE | Extra sequence included | 147239596 | 147284958 | -5795   | 7.24E-23 | 53 | 42 | DEL | 7.24E-23 |
| 3-353 | 3 | 147494740 | 147544785 | NONE | Extra sequence included | 147494740 | 147544785 | -8729   | 2.42E-19 | 24 | 17 | DEL | 2.42E-19 |
| 3-354 | 3 | 148214381 | 148238057 | NONE | Extra sequence included | 148214381 | 148238057 | -23676  | 0.00E+00 | 32 | 0  | DEL | 0.00E+00 |
| 3-357 | 3 | 149182402 | 149219271 | NONE | Extra sequence included | 149182402 | 149219271 | -6922   | 7.24E-23 | 68 | 60 | DEL | 7.24E-23 |
| 3-362 | 3 | 150873961 | 150916675 | NONE | Extra sequence included | 150873961 | 150916675 | -42714  | 0.00E+00 | 76 | 0  | DEL | 0.00E+00 |
| 3-366 | 3 | 152443850 | 152498895 | NONE | Extra sequence included | 152443850 | 152498895 | -22890  | 7.24E-23 | 46 | 36 | DEL | 7.24E-23 |
| 3-367 | 3 | 152560263 | 152619580 | NONE | Extra sequence included | 152560263 | 152619580 | -19452  | 7.24E-23 | 54 | 42 | DEL | 7.24E-23 |
| 3-373 | 3 | 160872388 | 160901900 | NONE | Extra sequence included | 160872388 | 160901900 | -7661   | 7.24E-23 | 54 | 39 | DEL | 7.24E-23 |
| 3-376 | 3 | 161293801 | 161386709 | NONE | Extra sequence included | 161293801 | 161386709 | -20763  | 7.24E-23 | 32 | 26 | DEL | 7.24E-23 |
| 3-378 | 3 | 161727209 | 161827626 | NONE | Extra sequence included | 161727209 | 161827626 | -6626   | 7.24E-23 | 46 | 41 | DEL | 7.24E-23 |
| 3-379 | 3 | 162955356 | 163120463 | NONE | Extra sequence included | 162955356 | 163120463 | -26072  | 7.24E-23 | 25 | 23 | DEL | 7.24E-23 |
| 3-385 | 3 | 164023907 | 164076963 | NONE | Extra sequence included | 164023907 | 164076963 | -19560  | 7.24E-23 | 45 | 36 | DEL | 7.24E-23 |
| 3-388 | 3 | 164819473 | 164869035 | NONE | Extra sequence included | 164819473 | 164869035 | -5218   | 1.48E-18 | 52 | 44 | DEL | 1.48E-18 |
| 3-395 | 3 | 172243168 | 172387727 | NONE | Extra sequence included | 172243168 | 172387727 | -25874  | 7.24E-23 | 40 | 31 | DEL | 7.24E-23 |
| 3-408 | 3 | 176351543 | 176429235 | NONE | Extra sequence included | 176351543 | 176429235 | -9273   | 2.68E-16 | 34 | 28 | DEL | 2.68E-16 |
| 3-413 | 3 | 182043319 | 182070680 | NONE | Extra sequence included | 182043319 | 182070680 | -5724   | 7.24E-23 | 69 | 50 | DEL | 7.24E-23 |
| 3-414 | 3 | 182157317 | 182303869 | NONE | Extra sequence included | 182157317 | 182303869 | -146552 | 0.00E+00 | 48 | 0  | DEL | 0.00E+00 |
| 3-417 | 3 | 183406367 | 183463426 | NONE | Extra sequence included | 183406367 | 183463426 | -13276  | 1.06E-22 | 63 | 48 | DEL | 1.06E-22 |
| 3-424 | 3 | 185009595 | 185021604 | NONE | Extra sequence included | 185009595 | 185021604 | -12009  | 0.00E+00 | 69 | 0  | DEL | 0.00E+00 |
| 3-431 | 3 | 186015930 | 186073917 | NONE | Extra sequence included | 186015930 | 186073917 | -8132   | 7.24E-23 | 58 | 52 | DEL | 7.24E-23 |
| 3-444 | 3 | 189083282 | 189114346 | NONE | Extra sequence included | 189083282 | 189114346 | -11202  | 7.24E-23 | 82 | 69 | DEL | 7.24E-23 |
| 3-457 | 3 | 198495222 | 198506489 | NONE | Extra sequence included | 198495222 | 198506489 | -11267  | 0.00E+00 | 35 | 0  | DEL | 0.00E+00 |
| 3-462 | 3 | 201057691 | 201092283 | NONE | Extra sequence included | 201057691 | 201092283 | -10416  | 7.24E-23 | 60 | 41 | DEL | 7.24E-23 |
| 3-465 | 3 | 201914016 | 201934936 | NONE | Extra sequence included | 201914016 | 201934936 | -8729   | 1.02E-22 | 42 | 32 | DEL | 1.02E-22 |
| 3-467 | 3 | 202298616 | 202310249 | NONE | Extra sequence included | 202298616 | 202310249 | -11633  | 0.00E+00 | 77 | 0  | DEL | 0.00E+00 |
| 3-478 | 3 | 204943691 | 205058606 | NONE | Extra sequence included | 204943691 | 205058606 | -16836  | 7.24E-23 | 39 | 29 | DEL | 7.24E-23 |
| 3-486 | 3 | 208074059 | 208131578 | NONE | Extra sequence included | 208074059 | 208131578 | -7842   | 7.24E-23 | 67 | 52 | DEL | 7.24E-23 |
| 3-516 | 3 | 215714139 | 215739637 | NONE | Extra sequence included | 215714139 | 215739637 | -6574   | 7.24E-23 | 78 | 55 | DEL | 7.24E-23 |
| 3-530 | 3 | 219942292 | 219952248 | NONE | Extra sequence included | 219942292 | 219952248 | -9956   | 0.00E+00 | 98 | 0  | DEL | 0.00E+00 |
| 3-532 | 3 | 220678583 | 220738872 | NONE | Extra sequence included | 220678583 | 220738872 | -13509  | 7.24E-23 | 36 | 26 | DEL | 7.24E-23 |
| 3-533 | 3 | 221618617 | 221690468 | NONE | Extra sequence included | 221618617 | 221690468 | -28852  | 1.09E-22 | 52 | 33 | DEL | 1.09E-22 |
| 3-535 | 3 | 222044235 | 222054204 | NONE | Extra sequence included | 222044235 | 222054204 | -9969   | 0.00E+00 | 54 | 0  | DEL | 0.00E+00 |
| 3-547 | 3 | 227527692 | 227589254 | NONE | Extra sequence included | 227527692 | 227589254 | -13720  | 7.24E-23 | 73 | 51 | DEL | 7.24E-23 |
| 3-550 | 3 | 228497488 | 228515149 | NONE | Extra sequence included | 228497488 | 228515149 | -17661  | 0.00E+00 | 63 | 0  | DEL | 0.00E+00 |
| 3-556 | 3 | 229579957 | 229588562 | NONE | Extra sequence included | 229579957 | 229588562 | -8605   | 0.00E+00 | 96 | 0  | DEL | 0.00E+00 |
| 4-1   | 4 | 5001638   | 5047791   | NONE | Extra sequence included | 5001638   | 5047791   | -11395  | 7.57E-23 | 57 | 40 | DEL | 7.57E-23 |
| 4-19  | 4 | 7958383   | 8014404   | NONE | Extra sequence included | 7958383   | 8014404   | -7530   | 3.99E-20 | 31 | 28 | DEL | 3.99E-20 |
| 4-27  | 4 | 9823145   | 9906061   | NONE | Extra sequence included | 9823145   | 9906061   | -51392  | 7.57E-23 | 72 | 54 | DEL | 7.57E-23 |
| 4-36  | 4 | 12539598  | 12588482  | NONE | Extra sequence included | 12539598  | 12588482  | -9193   | 7.57E-23 | 47 | 29 | DEL | 7.57E-23 |
| 4-44  | 4 | 18269470  | 18288562  | NONE | Extra sequence included | 18269470  | 18288562  | -19092  | 0.00E+00 | 75 | 0  | DEL | 0.00E+00 |
| 4-57  | 4 | 25549999  | 25595657  | NONE | Extra sequence included | 25549999  | 25595657  | -7935   | 7.57E-23 | 62 | 48 | DEL | 7.57E-23 |
| 4-61  | 4 | 29008926  | 29036595  | NONE | Extra sequence included | 29008926  | 29036595  | -5599   | 7.57E-23 | 69 | 52 | DEL | 7.57E-23 |
| 4-62  | 4 | 29334707  | 29370246  | NONE | Extra sequence included | 29334707  | 29370246  | -5931   | 7.57E-23 | 36 | 29 | DEL | 7.57E-23 |
| 4-64  | 4 | 29908665  | 29923925  | NONE | Extra sequence included | 29908665  | 29923925  | -15260  | 0.00E+00 | 58 | 0  | DEL | 0.00E+00 |
| 4-76  | 4 | 36884594  | 36987866  | NONE | Extra sequence included | 36884594  | 36987866  | -23225  | 7.57E-23 | 41 | 34 | DEL | 7.57E-23 |
| 4-83  | 4 | 38533673  | 38569161  | NONE | Extra sequence included |           |           |         |          |    |    |     |          |

|       |   |           |           |      |                         |           |           |         |          |    |    |     |          |
|-------|---|-----------|-----------|------|-------------------------|-----------|-----------|---------|----------|----|----|-----|----------|
| 4-125 | 4 | 53987560  | 54046663  | NONE | Extra sequence included | 53987560  | 54046663  | -7108   | 5.36E-17 | 39 | 29 | DEL | 5.36E-17 |
| 4-132 | 4 | 56997879  | 57081955  | NONE | Extra sequence included | 56997879  | 57081955  | -9677   | 7.57E-23 | 53 | 47 | DEL | 7.57E-23 |
| 4-146 | 4 | 63999799  | 64011570  | NONE | Extra sequence included | 63999799  | 64011570  | -11771  | 0.00E+00 | 44 | 0  | DEL | 0.00E+00 |
| 4-182 | 4 | 77175912  | 77262304  | NONE | Extra sequence included | 77175912  | 77262304  | -10296  | 2.58E-07 | 12 | 11 | DEL | 2.58E-07 |
| 4-200 | 4 | 82472497  | 82535647  | NONE | Extra sequence included | 82472497  | 82535647  | -12823  | 7.57E-23 | 48 | 35 | DEL | 7.57E-23 |
| 4-208 | 4 | 84775961  | 84820975  | NONE | Extra sequence included | 84775961  | 84820975  | -9355   | 7.57E-23 | 40 | 31 | DEL | 7.57E-23 |
| 4-219 | 4 | 87205670  | 87263411  | NONE | Extra sequence included | 87205670  | 87263411  | -13883  | 7.57E-23 | 70 | 54 | DEL | 7.57E-23 |
| 4-228 | 4 | 89074281  | 89181128  | NONE | Extra sequence included | 89074281  | 89181128  | -26320  | 1.10E-22 | 77 | 61 | DEL | 1.10E-22 |
| 4-242 | 4 | 93416349  | 93879654  | NONE | Extra sequence included | 93416349  | 93879654  | -463305 | 0.00E+00 | 25 | 0  | DEL | 0.00E+00 |
| 4-243 | 4 | 94088221  | 94176233  | NONE | Extra sequence included | 94088221  | 94176233  | -10095  | 1.58E-18 | 38 | 33 | DEL | 1.58E-18 |
| 4-248 | 4 | 95554499  | 95668337  | NONE | Extra sequence included | 95554499  | 95668337  | -12152  | 1.22E-06 | 13 | 12 | DEL | 1.22E-06 |
| 4-262 | 4 | 100704928 | 100721494 | NONE | Extra sequence included | 100704928 | 100721494 | -16566  | 0.00E+00 | 63 | 0  | DEL | 0.00E+00 |
| 4-264 | 4 | 100925040 | 100968525 | NONE | Extra sequence included | 100925040 | 100968525 | -5252   | 7.57E-23 | 63 | 53 | DEL | 7.57E-23 |
| 4-284 | 4 | 110959084 | 110984586 | NONE | Extra sequence included | 110959084 | 110984586 | -6179   | 7.57E-23 | 40 | 35 | DEL | 7.57E-23 |
| 4-285 | 4 | 111257933 | 111375509 | NONE | Extra sequence included | 111257933 | 111375509 | -29301  | 7.57E-23 | 30 | 21 | DEL | 7.57E-23 |
| 4-290 | 4 | 113095976 | 113141103 | NONE | Extra sequence included | 113095976 | 113141103 | -6669   | 7.57E-23 | 39 | 31 | DEL | 7.57E-23 |
| 4-301 | 4 | 116870721 | 116979321 | NONE | Extra sequence included | 116870721 | 116979321 | -45624  | 7.57E-23 | 42 | 37 | DEL | 7.57E-23 |
| 4-313 | 4 | 121079235 | 121132893 | NONE | Extra sequence included | 121079235 | 121132893 | -8154   | 7.57E-23 | 41 | 35 | DEL | 7.57E-23 |
| 4-315 | 4 | 121570111 | 121622763 | NONE | Extra sequence included | 121570111 | 121622763 | -16802  | 7.57E-23 | 39 | 27 | DEL | 7.57E-23 |
| 4-330 | 4 | 134172398 | 134246393 | NONE | Extra sequence included | 134172398 | 134246393 | -73995  | 0.00E+00 | 45 | 0  | DEL | 0.00E+00 |
| 4-333 | 4 | 135554247 | 135580163 | NONE | Extra sequence included | 135554247 | 135580163 | -25916  | 0.00E+00 | 61 | 0  | DEL | 0.00E+00 |
| 4-360 | 4 | 143636482 | 143774802 | NONE | Extra sequence included | 143636482 | 143774802 | -15541  | 1.57E-08 | 18 | 14 | DEL | 1.57E-08 |
| 4-370 | 4 | 148981316 | 149024581 | NONE | Extra sequence included | 148981316 | 149024581 | -11874  | 7.57E-23 | 34 | 31 | DEL | 7.57E-23 |
| 4-371 | 4 | 149332977 | 149409075 | NONE | Extra sequence included | 149332977 | 149409075 | -9314   | 7.57E-23 | 47 | 36 | DEL | 7.57E-23 |
| 4-393 | 4 | 157873600 | 157947119 | NONE | Extra sequence included | 157873600 | 157947119 | -73519  | 0.00E+00 | 72 | 0  | DEL | 0.00E+00 |
| 4-413 | 4 | 161861607 | 161936954 | NONE | Extra sequence included | 161861607 | 161936954 | -14078  | 7.57E-23 | 43 | 40 | DEL | 7.57E-23 |
| 4-417 | 4 | 162369850 | 162435095 | NONE | Extra sequence included | 162369850 | 162435095 | -10538  | 1.54E-20 | 33 | 19 | DEL | 1.54E-20 |
| 4-423 | 4 | 163996726 | 164047014 | NONE | Extra sequence included | 163996726 | 164047014 | -50288  | 0.00E+00 | 72 | 0  | DEL | 0.00E+00 |
| 4-438 | 4 | 168139399 | 168218824 | NONE | Extra sequence included | 168139399 | 168218824 | -14423  | 7.57E-23 | 50 | 33 | DEL | 7.57E-23 |
| 4-458 | 4 | 174327680 | 174362515 | NONE | Extra sequence included | 174327680 | 174362515 | -10961  | 7.57E-23 | 67 | 57 | DEL | 7.57E-23 |
| 4-462 | 4 | 174929778 | 174973178 | NONE | Extra sequence included | 174929778 | 174973178 | -6532   | 7.57E-23 | 85 | 65 | DEL | 7.57E-23 |
| 4-471 | 4 | 182369694 | 182462243 | NONE | Extra sequence included | 182369694 | 182462243 | -16013  | 7.57E-23 | 69 | 55 | DEL | 7.57E-23 |
| 4-486 | 4 | 189147113 | 189161261 | NONE | Extra sequence included | 189147113 | 189161261 | -14148  | 0.00E+00 | 36 | 0  | DEL | 0.00E+00 |
| 4-490 | 4 | 190081848 | 190097559 | NONE | Extra sequence included | 190081848 | 190097559 | -15711  | 0.00E+00 | 68 | 0  | DEL | 0.00E+00 |
| 4-500 | 4 | 194482241 | 194527176 | NONE | Extra sequence included | 194482241 | 194527176 | -11830  | 7.57E-23 | 72 | 55 | DEL | 7.57E-23 |
| 4-511 | 4 | 200054302 | 200064483 | NONE | Extra sequence included | 200054302 | 200064483 | -10181  | 0.00E+00 | 51 | 0  | DEL | 0.00E+00 |
| 4-512 | 4 | 200273074 | 200299531 | NONE | Extra sequence included | 200273074 | 200299531 | -9137   | 7.57E-23 | 65 | 43 | DEL | 7.57E-23 |
| 4-522 | 4 | 203095185 | 203124130 | NONE | Extra sequence included | 203095185 | 203124130 | -28945  | 0.00E+00 | 60 | 0  | DEL | 0.00E+00 |
| 4-523 | 4 | 203466115 | 203513310 | NONE | Extra sequence included | 203466115 | 203513310 | -19704  | 7.57E-23 | 53 | 45 | DEL | 7.57E-23 |
| 4-526 | 4 | 203851929 | 203879669 | NONE | Extra sequence included | 203851929 | 203879669 | -6365   | 7.57E-23 | 30 | 27 | DEL | 7.57E-23 |
| 4-539 | 4 | 206112343 | 206171586 | NONE | Extra sequence included | 206112343 | 206171586 | -12693  | 7.57E-23 | 51 | 42 | DEL | 7.57E-23 |
| 4-540 | 4 | 206720073 | 206749777 | NONE | Extra sequence included | 206720073 | 206749777 | -13172  | 1.08E-22 | 30 | 25 | DEL | 1.08E-22 |
| 4-543 | 4 | 207598749 | 207671176 | NONE | Extra sequence included | 207598749 | 207671176 | -61135  | 1.10E-22 | 72 | 55 | DEL | 1.10E-22 |
| 4-578 | 4 | 218049167 | 218144127 | NONE | Extra sequence included | 218049167 | 218144127 | -9830   | 8.17E-22 | 59 | 47 | DEL | 8.17E-22 |
| 4-581 | 4 | 219384332 | 219393303 | NONE | Extra sequence included | 219384332 | 219393303 | -8971   | 0.00E+00 | 71 | 0  | DEL | 0.00E+00 |
| 4-582 | 4 | 219918333 | 219958908 | NONE | Extra sequence included | 219918333 | 219958908 | -5280   | 7.57E-23 | 64 | 52 | DEL | 7.57E-23 |
| 4-587 | 4 | 221447661 | 221495139 | NONE | Extra sequence included | 221447661 | 221495139 | -47478  | 0.00E+00 | 66 | 0  | DEL | 0.00E+00 |
| 4-592 | 4 | 222570676 | 222621398 | NONE | Extra sequence included | 222570676 | 222621398 | -14783  | 7.57E-23 | 62 | 40 | DEL | 7.57E-23 |
| 4-608 | 4 | 225144541 | 225153910 | NONE | Extra sequence included | 225144541 | 225153910 | -9369   | 0.00E+00 | 51 | 0  | DEL | 0.00E+00 |
| 4-610 | 4 | 225274398 | 225299984 | NONE | Extra sequence included | 225274398 | 225299984 | -5887   | 7.57E-23 | 60 | 51 | DEL | 7.57E-23 |
| 4-614 | 4 | 225862692 | 225909038 | NONE | Extra sequence included | 225862692 | 225909038 | -5784   | 7.57E-23 | 50 | 45 | DEL | 7.57E-23 |
| 4-615 | 4 | 225977488 | 226003150 | NONE | Extra sequence included | 225977488 | 226003150 | -6809   | 7.57E-23 | 76 | 48 | DEL | 7.57E-23 |
| 4-618 | 4 | 226495975 | 226521040 | NONE | Extra sequence included | 226495975 | 226521040 | -25065  | 0.00E+00 | 60 | 0  | DEL | 0.00E+00 |
| 4-620 | 4 | 226726443 | 226734186 | NONE | Extra sequence included | 226726443 | 226734186 | -7743   | 0.00E+00 | 83 | 0  | DEL | 0.00E+00 |
| 4-622 | 4 | 226884951 | 226923907 | NONE | Extra sequence included | 226884951 | 226923907 | -5471   | 7.57E-23 | 68 | 55 | DEL | 7.57E-23 |
| 4-637 | 4 | 232942447 | 233040659 | NONE | Extra sequence included | 232942447 | 233040659 | -98212  | 0.00E+00 | 65 | 0  | DEL | 0.00E+00 |
| 4-643 | 4 | 234129213 | 234143499 | NONE | Extra sequence included | 234129213 | 234143499 | -14286  | 0.00E+00 | 67 | 0  | DEL | 0.00E+00 |
| 4-646 | 4 | 234799208 | 234834794 | NONE | Extra sequence included | 234799208 | 234834794 | -8290   | 7.57E-23 | 62 | 48 | DEL | 7.57E-23 |
| 5-25  | 5 | 5672707   | 5735821   | NONE | Extra sequence included | 5672707   | 5735821   | -6734   | 7.45E-13 | 33 | 26 | DEL | 7.45E-13 |
| 5-30  | 5 | 8122386   | 8138303   | NONE | Extra sequence included | 8122386   | 8138303   | -15917  | 0.00E+00 | 91 | 0  | DEL | 0.00E+00 |
| 5-36  | 5 | 9132223   | 9219221   | NONE | Extra sequence included | 9132223   | 9219221   | -9716   | 7.30E-23 | 73 | 47 | DEL | 7.30E-23 |
| 5-38  | 5 | 9690238   | 9725049   | NONE | Extra sequence included | 9690238   | 9725049   | -9398   | 7.30E-23 | 54 | 42 | DEL | 7.30E-23 |
| 5-43  | 5 | 10893751  | 11003756  | NONE | Extra sequence included | 10893751  | 11003756  | -13220  | 6.50E-16 | 32 | 24 | DEL | 6.50E-16 |
| 5-52  | 5 | 18280030  | 18338721  | NONE | Extra sequence included | 18280030  | 18338721  | -13276  | 7.30E-23 | 75 | 66 | DEL | 7.30E-23 |
| 5-92  | 5 | 39560020  | 39604608  | NONE | Extra sequence included | 39560020  | 39604608  | -13627  | 7.30E-23 | 64 | 53 | DEL | 7.30E-23 |
| 5-95  | 5 | 40160267  | 40267767  | NONE | Extra sequence included | 40160267  | 40267767  | -35172  | 7.30E-23 | 55 | 46 | DEL | 7.30E-23 |
| 5-107 | 5 | 44908423  | 44966680  | NONE | Extra sequence included | 44908423  | 44966680  | -9247   | 7.30E-23 | 57 | 41 | DEL | 7.30E-23 |
| 5-112 | 5 | 48210163  | 48352109  | NONE | Extra sequence included | 48210163  | 48352109  | -17317  | 1.47E-15 | 27 | 22 | DEL | 1.47E-15 |
| 5-124 | 5 | 52002961  | 52029740  | NONE | Extra sequence included | 52002961  | 52029740  | -10977  | 7.30E-23 | 69 | 44 | DEL | 7.30E-23 |
| 5-146 | 5 | 573256916 | 57332953  | NONE | Extra sequence included | 573256916 | 57332953  | -8578   | 7.30E-23 | 80 | 64 | DEL | 7.30E-23 |
| 5-156 | 5 | 64264720  | 64312996  | NONE | Extra sequence included | 64264720  | 64312996  | -5965   | 7.30E-23 | 78 | 64 | DEL | 7.30E-23 |
| 5-158 | 5 | 64793637  | 64815825  | NONE | Extra sequence included | 64793637  | 64815825  | -3345   | 1.03E-22 | 84 | 66 | DEL | 1.03E-22 |
| 5-206 | 5 | 79866283  | 79924121  | NONE | Extra sequence included | 79866283  | 79924121  | -8624   | 7.30E-23 | 60 | 40 | DEL | 7.30E-23 |
| 5-230 | 5 | 88808524  | 88875742  | NONE | Extra sequence included | 88808524  | 88875742  | -67218  | 0.00E+00 | 69 | 0  | DEL | 0.00E+00 |
| 5-240 | 5 | 91875062  | 91920020  | NONE | Extra sequence included | 91875062  | 91920020  | -14791  | 7.30E-23 | 58 | 42 | DEL | 7.30E-23 |
| 5-244 | 5 | 92952622  | 92984479  | NONE | Extra sequence included | 92952622  | 92984479  | -9201   | 7.30E-23 | 59 | 50 | DEL | 7.30E-23 |
| 5-256 | 5 | 97856408  | 97864623  | NONE | Extra sequence included | 97856408  | 97864623  | -8215   | 0.00E+00 | 67 | 0  | DEL | 0.00E+00 |
| 5-260 | 5 | 98534604  | 98572929  | NONE | Extra sequence included | 98534604  | 98572929  | -7134   | 7.30E-23 | 49 | 41 | DEL | 7.30E-23 |
| 5-268 | 5 | 101221874 | 101339277 | NONE | Extra sequence included | 101221874 | 101339277 | -15883  | 1.53E-18 | 22 | 22 | DEL | 1.53E-18 |
| 5-289 | 5 | 110470059 | 110476679 | NONE | Extra sequence included | 110470059 | 110476679 | -6620   | 0.00E+00 | 75 | 0  | DEL | 0.00E+00 |
| 5-296 | 5 | 113877909 | 113913157 | NONE | Extra sequence included | 113877909 | 113913157 | -5081   | 2.67E-22 | 41 | 29 | DEL | 2.67E-22 |
| 5-298 | 5 | 114374703 | 114424299 | NONE | Extra sequence included | 114374703 | 114424299 | -5854   | 7.30E-23 | 60 | 49 | DEL | 7.30E-23 |
| 5-299 | 5 | 115987450 | 116075541 | NONE | Extra sequence included | 115987450 | 116075541 | -11346  | 3.59E-14 | 22 | 19 | DEL | 3.59E-14 |
| 5-311 | 5 | 120925352 | 120971970 | NONE | Extra sequence included | 120925352 | 120971970 | -6991   | 7.30E-23 | 69 | 61 | DEL | 7.30E-23 |
| 5-312 | 5 | 121136142 | 121186331 | NONE | Extra sequence included | 121136142 | 121186331 | -50189  | 0.00E+00 | 53 | 0  | DEL | 0.00E+00 |
| 5-316 | 5 | 122452896 | 122480109 | NONE | Extra                   |           |           |         |          |    |    |     |          |

|       |   |           |           |      |                         |           |           |         |          |    |    |     |          |
|-------|---|-----------|-----------|------|-------------------------|-----------|-----------|---------|----------|----|----|-----|----------|
| 5-367 | 5 | 137550378 | 137585694 | NONE | Extra sequence included | 137550378 | 137585694 | -11453  | 7.30E-23 | 84 | 77 | DEL | 7.30E-23 |
| 5-371 | 5 | 138402187 | 138451703 | NONE | Extra sequence included | 138402187 | 138451703 | -9511   | 7.30E-23 | 68 | 38 | DEL | 7.30E-23 |
| 5-376 | 5 | 139686946 | 139765156 | NONE | Extra sequence included | 139686946 | 139765156 | -78210  | 0.00E+00 | 60 | 0  | DEL | 0.00E+00 |
| 5-379 | 5 | 140773897 | 140895631 | NONE | Extra sequence included | 140773897 | 140895631 | -34548  | 7.30E-23 | 39 | 31 | DEL | 7.30E-23 |
| 5-383 | 5 | 142256355 | 142327988 | NONE | Extra sequence included | 142256355 | 142327988 | -8051   | 7.30E-23 | 55 | 45 | DEL | 7.30E-23 |
| 5-394 | 5 | 146084542 | 146123854 | NONE | Extra sequence included | 146084542 | 146123854 | -7204   | 7.30E-23 | 74 | 59 | DEL | 7.30E-23 |
| 5-397 | 5 | 146455707 | 146544613 | NONE | Extra sequence included | 146455707 | 146544613 | -8912   | 1.31E-11 | 28 | 25 | DEL | 1.31E-11 |
| 5-417 | 5 | 157984027 | 158034865 | NONE | Extra sequence included | 157984027 | 158034865 | -6401   | 5.69E-21 | 42 | 33 | DEL | 5.69E-21 |
| 5-423 | 5 | 159826753 | 159862202 | NONE | Extra sequence included | 159826753 | 159862202 | -9421   | 7.30E-23 | 43 | 39 | DEL | 7.30E-23 |
| 5-425 | 5 | 162182330 | 162315372 | NONE | Extra sequence included | 162182330 | 162315372 | -133042 | 0.00E+00 | 70 | 0  | DEL | 0.00E+00 |
| 5-435 | 5 | 168165372 | 168188709 | NONE | Extra sequence included | 168165372 | 168188709 | -6570   | 7.30E-23 | 54 | 41 | DEL | 7.30E-23 |
| 5-465 | 5 | 186483536 | 186536776 | NONE | Extra sequence included | 186483536 | 186536776 | -53240  | 0.00E+00 | 70 | 0  | DEL | 0.00E+00 |
| 5-474 | 5 | 194714559 | 194748438 | NONE | Extra sequence included | 194714559 | 194748438 | -33879  | 0.00E+00 | 41 | 0  | DEL | 0.00E+00 |
| 5-477 | 5 | 195406850 | 195468676 | NONE | Extra sequence included | 195406850 | 195468676 | -7242   | 7.30E-23 | 60 | 46 | DEL | 7.30E-23 |
| 5-482 | 5 | 197467086 | 197545396 | NONE | Extra sequence included | 197467086 | 197545396 | -3698   | 3.53E-04 | 43 | 34 | DEL | 3.53E-04 |
| 5-493 | 5 | 208359826 | 208442938 | NONE | Extra sequence included | 208359826 | 208442938 | -10357  | 7.30E-23 | 71 | 54 | DEL | 7.30E-23 |
| 6-3   | 6 | 3169017   | 3204589   | NONE | Extra sequence included | 3169017   | 3204589   | -7479   | 8.15E-23 | 41 | 35 | DEL | 8.15E-23 |
| 6-17  | 6 | 19374816  | 19391907  | NONE | Extra sequence included | 19374816  | 19391907  | -8314   | 8.15E-23 | 47 | 26 | DEL | 8.15E-23 |
| 6-50  | 6 | 37550355  | 37601775  | NONE | Extra sequence included | 37550355  | 37601775  | -51420  | 0.00E+00 | 71 | 0  | DEL | 0.00E+00 |
| 6-51  | 6 | 37650109  | 37662409  | NONE | Extra sequence included | 37650109  | 37662409  | -12300  | 0.00E+00 | 54 | 0  | DEL | 0.00E+00 |
| 6-62  | 6 | 40369965  | 40408306  | NONE | Extra sequence included | 40369965  | 40408306  | -27167  | 8.15E-23 | 47 | 34 | DEL | 8.15E-23 |
| 6-68  | 6 | 42071313  | 42139141  | NONE | Extra sequence included | 42071313  | 42139141  | -9651   | 8.15E-23 | 55 | 51 | DEL | 8.15E-23 |
| 6-76  | 6 | 51482804  | 51491009  | NONE | Extra sequence included | 51482804  | 51491009  | -8205   | 0.00E+00 | 60 | 0  | DEL | 0.00E+00 |
| 6-84  | 6 | 53385421  | 53438141  | NONE | Extra sequence included | 53385421  | 53438141  | -11509  | 8.15E-23 | 89 | 65 | DEL | 8.15E-23 |
| 6-94  | 6 | 56010278  | 56052782  | NONE | Extra sequence included | 56010278  | 56052782  | -6624   | 8.15E-23 | 50 | 46 | DEL | 8.15E-23 |
| 6-98  | 6 | 56601175  | 56681612  | NONE | Extra sequence included | 56601175  | 56681612  | -11519  | 8.15E-23 | 45 | 39 | DEL | 8.15E-23 |
| 6-106 | 6 | 61207315  | 61299462  | NONE | Extra sequence included | 61207315  | 61299462  | -9453   | 8.15E-23 | 72 | 60 | DEL | 8.15E-23 |
| 6-130 | 6 | 66940833  | 66981092  | NONE | Extra sequence included | 66940833  | 66981092  | -6631   | 8.15E-23 | 52 | 45 | DEL | 8.15E-23 |
| 6-131 | 6 | 67031453  | 67149994  | NONE | Extra sequence included | 67031453  | 67149994  | -13613  | 8.15E-23 | 48 | 42 | DEL | 8.15E-23 |
| 6-135 | 6 | 69332099  | 69398826  | NONE | Extra sequence included | 69332099  | 69398826  | -66727  | 0.00E+00 | 28 | 0  | DEL | 0.00E+00 |
| 6-137 | 6 | 69677739  | 69726630  | NONE | Extra sequence included | 69677739  | 69726630  | -8331   | 8.15E-23 | 45 | 37 | DEL | 8.15E-23 |
| 6-142 | 6 | 73974378  | 74051735  | NONE | Extra sequence included | 73974378  | 74051735  | -21463  | 8.15E-23 | 47 | 32 | DEL | 8.15E-23 |
| 6-150 | 6 | 77169509  | 77244851  | NONE | Extra sequence included | 77169509  | 77244851  | -75342  | 0.00E+00 | 57 | 0  | DEL | 0.00E+00 |
| 6-154 | 6 | 78232988  | 78276376  | NONE | Extra sequence included | 78232988  | 78276376  | -11656  | 8.15E-23 | 60 | 45 | DEL | 8.15E-23 |
| 6-159 | 6 | 79473612  | 79516683  | NONE | Extra sequence included | 79473612  | 79516683  | -6470   | 8.15E-23 | 43 | 43 | DEL | 8.15E-23 |
| 6-160 | 6 | 79745532  | 79754768  | NONE | Extra sequence included | 79745532  | 79754768  | -9236   | 0.00E+00 | 63 | 0  | DEL | 0.00E+00 |
| 6-168 | 6 | 88782801  | 88874984  | NONE | Extra sequence included | 88782801  | 88874984  | -10142  | 1.09E-19 | 47 | 38 | DEL | 1.09E-19 |
| 6-169 | 6 | 90790135  | 90842446  | NONE | Extra sequence included | 90790135  | 90842446  | -7923   | 6.79E-19 | 25 | 21 | DEL | 6.79E-19 |
| 7-2   | 7 | 5066063   | 5107900   | NONE | Extra sequence included | 5066063   | 5107900   | -5175   | 7.74E-23 | 51 | 40 | DEL | 7.74E-23 |
| 7-20  | 7 | 9252534   | 9415511   | NONE | Extra sequence included | 9252534   | 9415511   | -20963  | 2.85E-22 | 45 | 29 | DEL | 2.85E-22 |
| 7-30  | 7 | 15874945  | 15874945  | NONE | Extra sequence included | 15874945  | 15874945  | -11230  | 0.00E+00 | 46 | 0  | DEL | 0.00E+00 |
| 7-39  | 7 | 22968753  | 23135760  | NONE | Extra sequence included | 22968753  | 23135760  | -15027  | 9.89E-08 | 24 | 19 | DEL | 9.89E-08 |
| 7-44  | 7 | 28035665  | 28072795  | NONE | Extra sequence included | 28035665  | 28072795  | -37130  | 0.00E+00 | 48 | 0  | DEL | 0.00E+00 |
| 7-61  | 7 | 38052874  | 38077063  | NONE | Extra sequence included | 38052874  | 38077063  | -8987   | 7.74E-23 | 59 | 41 | DEL | 7.74E-23 |
| 7-70  | 7 | 40503980  | 40585010  | NONE | Extra sequence included | 40503980  | 40585010  | -8404   | 7.74E-23 | 59 | 49 | DEL | 7.74E-23 |
| 7-79  | 7 | 44607034  | 44673508  | NONE | Extra sequence included | 44607034  | 44673508  | -12533  | 7.74E-23 | 71 | 59 | DEL | 7.74E-23 |
| 7-80  | 7 | 44803826  | 44833203  | NONE | Extra sequence included | 44803826  | 44833203  | -10656  | 7.74E-23 | 76 | 51 | DEL | 7.74E-23 |
| 7-81  | 7 | 44902911  | 44949462  | NONE | Extra sequence included | 44902911  | 44949462  | -5087   | 2.28E-21 | 68 | 46 | DEL | 2.28E-21 |
| 7-96  | 7 | 48549010  | 48599673  | NONE | Extra sequence included | 48549010  | 48599673  | -10771  | 7.74E-23 | 42 | 35 | DEL | 7.74E-23 |
| 7-110 | 7 | 56312200  | 56358983  | NONE | Extra sequence included | 56312200  | 56358983  | -9789   | 7.74E-23 | 37 | 28 | DEL | 7.74E-23 |
| 7-111 | 7 | 56444478  | 56483790  | NONE | Extra sequence included | 56444478  | 56483790  | -5667   | 7.74E-23 | 38 | 31 | DEL | 7.74E-23 |
| 7-113 | 7 | 56836477  | 56927616  | NONE | Extra sequence included | 56836477  | 56927616  | -9534   | 8.72E-09 | 17 | 17 | DEL | 8.72E-09 |
| 7-114 | 7 | 59392845  | 59423487  | NONE | Extra sequence included | 59392845  | 59423487  | -7790   | 7.74E-23 | 60 | 48 | DEL | 7.74E-23 |
| 7-125 | 7 | 61977968  | 62024692  | NONE | Extra sequence included | 61977968  | 62024692  | -6905   | 7.74E-23 | 65 | 40 | DEL | 7.74E-23 |
| 7-140 | 7 | 66587023  | 66611950  | NONE | Extra sequence included | 66587023  | 66611950  | -7455   | 7.74E-23 | 77 | 55 | DEL | 7.74E-23 |
| 7-146 | 7 | 68515388  | 68550956  | NONE | Extra sequence included | 68515388  | 68550956  | -6138   | 7.74E-23 | 44 | 35 | DEL | 7.74E-23 |
| 7-147 | 7 | 68550956  | 68644265  | NONE | Extra sequence included | 68550956  | 68644265  | -10149  | 7.90E-15 | 33 | 28 | DEL | 7.90E-15 |
| 7-177 | 7 | 78868863  | 78923039  | NONE | Extra sequence included | 78868863  | 78923039  | -54176  | 0.00E+00 | 54 | 0  | DEL | 0.00E+00 |
| 7-214 | 7 | 95372385  | 95426848  | NONE | Extra sequence included | 95372385  | 95426848  | -21198  | 7.74E-23 | 48 | 43 | DEL | 7.74E-23 |
| 7-221 | 7 | 99245004  | 99303961  | NONE | Extra sequence included | 99245004  | 99303961  | -18884  | 7.74E-23 | 74 | 62 | DEL | 7.74E-23 |
| 7-241 | 7 | 110172859 | 110214414 | NONE | Extra sequence included | 110172859 | 110214414 | -6575   | 7.74E-23 | 46 | 39 | DEL | 7.74E-23 |
| 7-243 | 7 | 110889373 | 110950677 | NONE | Extra sequence included | 110889373 | 110950677 | -15627  | 7.74E-23 | 79 | 53 | DEL | 7.74E-23 |
| 7-246 | 7 | 113527789 | 113545596 | NONE | Extra sequence included | 113527789 | 113545596 | -17807  | 0.00E+00 | 61 | 0  | DEL | 0.00E+00 |
| 7-253 | 7 | 115180722 | 115223694 | NONE | Extra sequence included | 115180722 | 115223694 | -11615  | 7.74E-23 | 52 | 38 | DEL | 7.74E-23 |
| 7-259 | 7 | 119996010 | 120068957 | NONE | Extra sequence included | 119996010 | 120068957 | -11018  | 7.74E-23 | 70 | 56 | DEL | 7.74E-23 |
| 7-264 | 7 | 125143683 | 125208603 | NONE | Extra sequence included | 125143683 | 125208603 | -7101   | 7.74E-23 | 65 | 57 | DEL | 7.74E-23 |
| 7-283 | 7 | 138358118 | 138391461 | NONE | Extra sequence included | 138358118 | 138391461 | -5078   | 7.74E-23 | 72 | 59 | DEL | 7.74E-23 |
| 7-285 | 7 | 138600439 | 138623278 | NONE | Extra sequence included | 138600439 | 138623278 | -8051   | 7.74E-23 | 79 | 55 | DEL | 7.74E-23 |
| 7-292 | 7 | 142510052 | 142565622 | NONE | Extra sequence included | 142510052 | 142565622 | -6023   | 2.57E-07 | 22 | 14 | DEL | 2.57E-07 |
| 7-302 | 7 | 153114866 | 153148042 | NONE | Extra sequence included | 153114866 | 153148042 | -33176  | 0.00E+00 | 59 | 0  | DEL | 0.00E+00 |
| 7-303 | 7 | 153464778 | 153486248 | NONE | Extra sequence included | 153464778 | 153486248 | -5855   | 1.08E-22 | 77 | 54 | DEL | 1.08E-22 |
| 7-305 | 7 | 155440514 | 155475982 | NONE | Extra sequence included | 155440514 | 155475982 | -9321   | 7.74E-23 | 64 | 52 | DEL | 7.74E-23 |
| 8-3   | 8 | 2214680   | 2258445   | NONE | Extra sequence included | 2214680   | 2258445   | -7214   | 6.97E-23 | 75 | 62 | DEL | 6.97E-23 |
| 8-4   | 8 | 4925229   | 4977004   | NONE | Extra sequence included | 4925229   | 4977004   | -13471  | 6.97E-23 | 78 | 60 | DEL | 6.97E-23 |
| 8-11  | 8 | 5732525   | 5754809   | NONE | Extra sequence included | 5732525   | 5754809   | -6993   | 6.97E-23 | 45 | 38 | DEL | 6.97E-23 |
| 8-16  | 8 | 8594390   | 8658073   | NONE | Extra sequence included | 8594390   | 8658073   | -21412  | 6.97E-23 | 71 | 51 | DEL | 6.97E-23 |
| 8-30  | 8 | 11686853  | 11726167  | NONE | Extra sequence included | 11686853  | 11726167  | -9070   | 6.97E-23 | 68 | 67 | DEL | 6.97E-23 |
| 8-45  | 8 | 15752896  | 15801697  | NONE | Extra sequence included | 15752896  | 15801697  | -14060  | 6.97E-23 | 67 | 53 | DEL | 6.97E-23 |
| 8-46  | 8 | 16020368  | 16118402  | NONE | Extra sequence included | 16020368  | 16118402  | -22143  | 6.97E-23 | 51 | 42 | DEL | 6.97E-23 |
| 8-57  | 8 | 19097115  | 19154218  | NONE | Extra sequence included | 19097115  | 19154218  | -7367   | 6.97E-23 | 75 | 54 | DEL | 6.97E-23 |
| 8-58  | 8 | 19189483  | 19228443  | NONE | Extra sequence included | 19189483  | 19228443  | -9379   | 6.97E-23 | 76 | 60 | DEL | 6.97E-23 |
| 8-64  | 8 | 21218002  | 21252113  | NONE | Extra sequence included | 21218002  | 21252113  | -5383   | 6.97E-23 | 72 | 54 | DEL | 6.97E-23 |
| 8-73  | 8 | 24092623  | 24175642  | NONE | Extra sequence included | 24092623  | 24175642  | -83019  | 0.00E+00 | 50 | 0  | DEL | 0.00E+00 |
| 8-78  | 8 | 25393023  | 25404141  | NONE | Extra sequence included | 25393023  | 25404141  | -11118  | 0.00E+00 | 67 | 0  | DEL | 0.00E+00 |
| 8-103 | 8 | 33398982  | 33440261  | NONE | Extra sequence included | 33398982  | 33440261  | -5748   | 6.97E-23 | 43 | 35 | DEL | 6.97E-23 |
| 8-104 | 8 | 34439982  | 34453987  | NONE | Extra sequence included | 34439982  | 34453987  | -14005  | 0.00E+00 | 32 | 0  | DEL | 0.00E+00 |
| 8-109 | 8 | 35447185  | 35486353  | NONE | Extra sequence included | 35447185  | 35486353  | -7544   | 6.97E-23 | 47 | 47 | DEL | 6.97E-23 |
| 8-119 |   |           |           |      |                         |           |           |         |          |    |    |     |          |

|        |    |           |           |      |                         |           |           |        |          |     |    |     |          |
|--------|----|-----------|-----------|------|-------------------------|-----------|-----------|--------|----------|-----|----|-----|----------|
| 8-135  | 8  | 43127642  | 431272315 | NONE | Extra sequence included | 43127642  | 431272315 | -9475  | 6.97E-23 | 49  | 40 | DEL | 6.97E-23 |
| 8-142  | 8  | 44720714  | 44785444  | NONE | Extra sequence included | 44720714  | 44785444  | -14347 | 6.97E-23 | 77  | 66 | DEL | 6.97E-23 |
| 8-151  | 8  | 51910445  | 51961870  | NONE | Extra sequence included | 51910445  | 51961870  | -7627  | 6.97E-23 | 46  | 33 | DEL | 6.97E-23 |
| 8-157  | 8  | 54694379  | 54784919  | NONE | Extra sequence included | 54694379  | 54784919  | -21948 | 6.97E-23 | 49  | 37 | DEL | 6.97E-23 |
| 8-159  | 8  | 55239739  | 55342916  | NONE | Extra sequence included | 55239739  | 55342916  | -13177 | 0.00E+00 | 82  | 0  | DEL | 0.00E+00 |
| 8-161  | 8  | 55589607  | 55659443  | NONE | Extra sequence included | 55589607  | 55659443  | -8720  | 6.97E-23 | 66  | 57 | DEL | 6.97E-23 |
| 8-180  | 8  | 63996531  | 64053585  | NONE | Extra sequence included | 63996531  | 64053585  | -12751 | 6.97E-23 | 67  | 51 | DEL | 6.97E-23 |
| 8-181  | 8  | 64117297  | 641444781 | NONE | Extra sequence included | 64117297  | 641444781 | -6469  | 6.97E-23 | 74  | 53 | DEL | 6.97E-23 |
| 8-198  | 8  | 70132032  | 70182527  | NONE | Extra sequence included | 70132032  | 70182527  | -14103 | 6.97E-23 | 55  | 36 | DEL | 6.97E-23 |
| 8-210  | 8  | 74501377  | 74558184  | NONE | Extra sequence included | 74501377  | 74558184  | -12643 | 6.97E-23 | 63  | 47 | DEL | 6.97E-23 |
| 8-221  | 8  | 77016090  | 77109355  | NONE | Extra sequence included | 77016090  | 77109355  | -18990 | 6.97E-23 | 66  | 52 | DEL | 6.97E-23 |
| 8-233  | 8  | 82394738  | 82467628  | NONE | Extra sequence included | 82394738  | 82467628  | -9760  | 6.97E-23 | 44  | 38 | DEL | 6.97E-23 |
| 8-242  | 8  | 89700369  | 89736422  | NONE | Extra sequence included | 89700369  | 89736422  | -8020  | 6.97E-23 | 55  | 42 | DEL | 6.97E-23 |
| 8-262  | 8  | 110387173 | 110442793 | NONE | Extra sequence included | 110387173 | 110442793 | -6542  | 6.19E-16 | 43  | 29 | DEL | 6.19E-16 |
| 8-270  | 8  | 113569516 | 113658009 | NONE | Extra sequence included | 113569516 | 113658009 | -3849  | 4.49E-05 | 63  | 54 | DEL | 4.49E-05 |
| 8-298  | 8  | 129537776 | 129624221 | NONE | Extra sequence included | 129537776 | 129624221 | -11215 | 6.97E-23 | 62  | 53 | DEL | 6.97E-23 |
| 8-303  | 8  | 130663852 | 130727558 | NONE | Extra sequence included | 130663852 | 130727558 | -12629 | 6.97E-23 | 54  | 38 | DEL | 6.97E-23 |
| 8-308  | 8  | 132920645 | 132968777 | NONE | Extra sequence included | 132920645 | 132968777 | -6154  | 6.97E-23 | 55  | 44 | DEL | 6.97E-23 |
| 8-324  | 8  | 136815989 | 136842012 | NONE | Extra sequence included | 136815989 | 136842012 | -5122  | 6.97E-23 | 55  | 44 | DEL | 6.97E-23 |
| 8-328  | 8  | 144535234 | 144497787 | NONE | Extra sequence included | 144535234 | 144497787 | -37447 | 0.00E+00 | 74  | 0  | DEL | 0.00E+00 |
| 8-337  | 8  | 148720708 | 148756448 | NONE | Extra sequence included | 148720708 | 148756448 | -10636 | 6.97E-23 | 79  | 60 | DEL | 6.97E-23 |
| 8-345  | 8  | 150034643 | 150088214 | NONE | Extra sequence included | 150034643 | 150088214 | -8742  | 6.97E-23 | 58  | 32 | DEL | 6.97E-23 |
| 8-377  | 8  | 171334485 | 171396553 | NONE | Extra sequence included | 171334485 | 171396553 | -7124  | 6.97E-23 | 67  | 52 | DEL | 6.97E-23 |
| 8-378  | 8  | 171462838 | 171509498 | NONE | Extra sequence included | 171462838 | 171509498 | -16861 | 8.28E-23 | 71  | 53 | DEL | 8.28E-23 |
| 9-15   | 9  | 15846768  | 15946657  | NONE | Extra sequence included | 15846768  | 15946657  | -17140 | 7.33E-23 | 43  | 36 | DEL | 7.33E-23 |
| 9-17   | 9  | 16497026  | 16555392  | NONE | Extra sequence included | 16497026  | 16555392  | -8719  | 7.33E-23 | 74  | 64 | DEL | 7.33E-23 |
| 9-29   | 9  | 21769530  | 21785847  | NONE | Extra sequence included | 21769530  | 21785847  | -16317 | 0.00E+00 | 83  | 0  | DEL | 0.00E+00 |
| 9-33   | 9  | 25033568  | 25067364  | NONE | Extra sequence included | 25033568  | 25067364  | -6081  | 7.33E-23 | 55  | 46 | DEL | 7.33E-23 |
| 9-42   | 9  | 30656447  | 30748767  | NONE | Extra sequence included | 30656447  | 30748767  | -17727 | 7.33E-23 | 35  | 27 | DEL | 7.33E-23 |
| 9-47   | 9  | 33176031  | 33216289  | NONE | Extra sequence included | 33176031  | 33216289  | -7823  | 7.33E-23 | 76  | 52 | DEL | 7.33E-23 |
| 9-60   | 9  | 39384704  | 39427644  | NONE | Extra sequence included | 39384704  | 39427644  | -7482  | 7.33E-23 | 62  | 51 | DEL | 7.33E-23 |
| 9-84   | 9  | 48543349  | 48627917  | NONE | Extra sequence included | 48543349  | 48627917  | -10079 | 1.22E-16 | 34  | 27 | DEL | 1.22E-16 |
| 9-88   | 9  | 49671866  | 49735525  | NONE | Extra sequence included | 49671866  | 49735525  | -8119  | 1.54E-12 | 22  | 18 | DEL | 1.54E-12 |
| 9-96   | 9  | 53321018  | 53339567  | NONE | Extra sequence included | 53321018  | 53339567  | -5183  | 7.33E-23 | 38  | 28 | DEL | 7.33E-23 |
| 9-120  | 9  | 64948265  | 65016516  | NONE | Extra sequence included | 64948265  | 65016516  | -16093 | 7.33E-23 | 48  | 42 | DEL | 7.33E-23 |
| 9-129  | 9  | 67376585  | 67426091  | NONE | Extra sequence included | 67376585  | 67426091  | -49506 | 0.00E+00 | 83  | 0  | DEL | 0.00E+00 |
| 9-135  | 9  | 69974322  | 70025720  | NONE | Extra sequence included | 69974322  | 70025720  | -16067 | 7.33E-23 | 60  | 45 | DEL | 7.33E-23 |
| 9-140  | 9  | 70904868  | 70955423  | NONE | Extra sequence included | 70904868  | 70955423  | -15244 | 7.33E-23 | 61  | 54 | DEL | 7.33E-23 |
| 9-145  | 9  | 72036960  | 72081538  | NONE | Extra sequence included | 72036960  | 72081538  | -5685  | 9.10E-18 | 30  | 28 | DEL | 9.10E-18 |
| 9-150  | 9  | 73650882  | 73714333  | NONE | Extra sequence included | 73650882  | 73714333  | -6649  | 2.69E-22 | 68  | 49 | DEL | 2.69E-22 |
| 9-167  | 9  | 80132348  | 80172031  | NONE | Extra sequence included | 80132348  | 80172031  | -5804  | 7.33E-23 | 85  | 56 | DEL | 7.33E-23 |
| 9-210  | 9  | 92566675  | 92620389  | NONE | Extra sequence included | 92566675  | 92620389  | -63714 | 0.00E+00 | 84  | 0  | DEL | 0.00E+00 |
| 9-216  | 9  | 94489696  | 94506556  | NONE | Extra sequence included | 94489696  | 94506556  | -5699  | 7.33E-23 | 34  | 44 | DEL | 7.33E-23 |
| 9-220  | 9  | 95263117  | 95324452  | NONE | Extra sequence included | 95263117  | 95324452  | -22943 | 7.33E-23 | 38  | 35 | DEL | 7.33E-23 |
| 9-229  | 9  | 96948739  | 97015776  | NONE | Extra sequence included | 96948739  | 97015776  | -27367 | 7.33E-23 | 42  | 26 | DEL | 7.33E-23 |
| 9-244  | 9  | 102065952 | 102103790 | NONE | Extra sequence included | 102065952 | 102103790 | -9874  | 7.33E-23 | 74  | 54 | DEL | 7.33E-23 |
| 9-251  | 9  | 106543520 | 106605881 | NONE | Extra sequence included | 106543520 | 106605881 | -8900  | 5.77E-21 | 34  | 25 | DEL | 5.77E-21 |
| 9-260  | 9  | 113863209 | 113896338 | NONE | Extra sequence included | 113863209 | 113896338 | -6704  | 7.33E-23 | 79  | 67 | DEL | 7.33E-23 |
| 9-262  | 9  | 114174667 | 114201577 | NONE | Extra sequence included | 114174667 | 114201577 | -26910 | 0.00E+00 | 57  | 0  | DEL | 0.00E+00 |
| 9-265  | 9  | 114652618 | 114686788 | NONE | Extra sequence included | 114652618 | 114686788 | -5008  | 7.33E-23 | 50  | 46 | DEL | 7.33E-23 |
| 9-266  | 9  | 114760005 | 114882737 | NONE | Extra sequence included | 114760005 | 114882737 | -30826 | 7.33E-23 | 58  | 39 | DEL | 7.33E-23 |
| 9-280  | 9  | 125296218 | 125359010 | NONE | Extra sequence included | 125296218 | 125359010 | -9230  | 1.51E-20 | 25  | 23 | DEL | 1.51E-20 |
| 9-283  | 9  | 132641295 | 132650262 | NONE | Extra sequence included | 132641295 | 132650262 | -8967  | 0.00E+00 | 45  | 0  | DEL | 0.00E+00 |
| 9-284  | 9  | 132692502 | 132755774 | NONE | Extra sequence included | 132692502 | 132755774 | -6616  | 1.53E-18 | 58  | 41 | DEL | 1.53E-18 |
| 9-289  | 9  | 134075976 | 134152192 | NONE | Extra sequence included | 134075976 | 134152192 | -8170  | 2.85E-16 | 42  | 33 | DEL | 2.85E-16 |
| 9-291  | 9  | 134543773 | 134565752 | NONE | Extra sequence included | 134543773 | 134565752 | -6117  | 7.33E-23 | 81  | 56 | DEL | 7.33E-23 |
| 9-331  | 9  | 144707940 | 144750603 | NONE | Extra sequence included | 144707940 | 144750603 | -7838  | 7.33E-23 | 40  | 31 | DEL | 7.33E-23 |
| 9-332  | 9  | 144955904 | 145063090 | NONE | Extra sequence included | 144955904 | 145063090 | -54305 | 1.01E-22 | 33  | 25 | DEL | 1.01E-22 |
| 9-339  | 9  | 146642504 | 146664093 | NONE | Extra sequence included | 146642504 | 146664093 | -8416  | 7.33E-23 | 100 | 73 | DEL | 7.33E-23 |
| 9-341  | 9  | 147234558 | 147281402 | NONE | Extra sequence included | 147234558 | 147281402 | -46844 | 0.00E+00 | 72  | 0  | DEL | 0.00E+00 |
| 10-4   | 10 | 658950    | 753273    | NONE | Extra sequence included | 658950    | 753273    | -10060 | 7.28E-23 | 76  | 64 | DEL | 7.28E-23 |
| 10-5   | 10 | 866207    | 927726    | NONE | Extra sequence included | 866207    | 927726    | -4116  | 1.02E-10 | 77  | 55 | DEL | 1.02E-10 |
| 10-17  | 10 | 8197577   | 8270229   | NONE | Extra sequence included | 8197577   | 8270229   | -6942  | 8.93E-18 | 57  | 45 | DEL | 8.93E-18 |
| 10-32  | 10 | 15573477  | 15598922  | NONE | Extra sequence included | 15573477  | 15598922  | -3360  | 7.28E-23 | 64  | 56 | DEL | 7.28E-23 |
| 10-34  | 10 | 16362848  | 16455985  | NONE | Extra sequence included | 16362848  | 16455985  | -10047 | 7.45E-15 | 36  | 28 | DEL | 7.45E-15 |
| 10-50  | 10 | 23284697  | 23342840  | NONE | Extra sequence included | 23284697  | 23342840  | -11167 | 7.28E-23 | 81  | 60 | DEL | 7.28E-23 |
| 10-52  | 10 | 24100848  | 24166963  | NONE | Extra sequence included | 24100848  | 24166963  | -9851  | 7.28E-23 | 43  | 37 | DEL | 7.28E-23 |
| 10-63  | 10 | 30095825  | 30132260  | NONE | Extra sequence included | 30095825  | 30132260  | -12652 | 7.28E-23 | 64  | 44 | DEL | 7.28E-23 |
| 10-64  | 10 | 30170129  | 30229807  | NONE | Extra sequence included | 30170129  | 30229807  | -6203  | 2.13E-21 | 71  | 48 | DEL | 2.13E-21 |
| 10-84  | 10 | 42271351  | 42316234  | NONE | Extra sequence included | 42271351  | 42316234  | -9800  | 7.28E-23 | 58  | 48 | DEL | 7.28E-23 |
| 10-93  | 10 | 46663287  | 46731557  | NONE | Extra sequence included | 46663287  | 46731557  | -17649 | 7.28E-23 | 54  | 42 | DEL | 7.28E-23 |
| 10-97  | 10 | 47490072  | 47530738  | NONE | Extra sequence included | 47490072  | 47530738  | -12577 | 7.28E-23 | 46  | 43 | DEL | 7.28E-23 |
| 10-104 | 10 | 52987310  | 53091834  | NONE | Extra sequence included | 52987310  | 53091834  | -10638 | 5.08E-17 | 49  | 36 | DEL | 5.08E-17 |
| 10-126 | 10 | 60943134  | 60972987  | NONE | Extra sequence included | 60943134  | 60972987  | -5577  | 7.28E-23 | 72  | 62 | DEL | 7.28E-23 |
| 10-136 | 10 | 62461281  | 62501300  | NONE | Extra sequence included | 62461281  | 62501300  | -6436  | 7.28E-23 | 43  | 39 | DEL | 7.28E-23 |
| 10-138 | 10 | 67632714  | 67658555  | NONE | Extra sequence included | 67632714  | 67658555  | -5021  | 7.28E-23 | 67  | 50 | DEL | 7.28E-23 |
| 10-142 | 10 | 69086786  | 69143924  | NONE | Extra sequence included | 69086786  | 69143924  | -57138 | 0.00E+00 | 47  | 0  | DEL | 0.00E+00 |
| 10-143 | 10 | 69211729  | 69252028  | NONE | Extra sequence included | 69211729  | 69252028  | -40299 | 0.00E+00 | 43  | 0  | DEL | 0.00E+00 |
| 10-145 | 10 | 69561317  | 69618634  | NONE | Extra sequence included | 69561317  | 69618634  | -9769  | 7.28E-23 | 63  | 51 | DEL | 7.28E-23 |
| 10-147 | 10 | 69864526  | 69955713  | NONE | Extra sequence included | 69864526  | 69955713  | -91187 | 0.00E+00 | 73  | 0  | DEL | 0.00E+00 |
| 10-148 | 10 | 71236328  | 71259018  | NONE | Extra sequence included | 71236328  | 71259018  | -22690 | 0.00E+00 | 36  | 0  | DEL | 0.00E+00 |
| 10-158 | 10 | 74008389  | 74049554  | NONE | Extra sequence included | 74008389  | 74049554  | -13482 | 7.28E-23 | 39  | 31 | DEL | 7.28E-23 |
| 10-161 | 10 | 74785473  | 74892003  | NONE | Extra sequence included | 74785473  | 74892003  | -14702 | 7.28E-23 | 39  | 30 | DEL | 7.28E-23 |
| 10-174 | 10 | 77379070  | 77395484  | NONE | Extra sequence included | 77379070  | 77395484  | -16414 | 0.00E+00 | 65  | 0  | DEL | 0.00E+00 |
| 10-178 | 10 | 82274168  | 82296602  | NONE | Extra sequence included | 82274168  | 82296602  | -22434 | 0.00E+00 | 45  | 0  | DEL | 0.00E+00 |
| 10-186 | 10 | 84302891  | 84392793  | NONE | Extra sequence included | 84302891  | 84392793  | -18661 | 5.66E-21 | 13  | 11 | DEL | 5.66E-21 |
| 10-191 | 10 | 86638150  | 86648215  | NONE | Extra sequence included | 86638150  | 8664      |        |          |     |    |     |          |

|        |    |           |           |      |                         |           |           |         |          |    |    |     |          |
|--------|----|-----------|-----------|------|-------------------------|-----------|-----------|---------|----------|----|----|-----|----------|
| 10-226 | 10 | 105223593 | 105361720 | NONE | Extra sequence included | 105223593 | 105361720 | -138127 | 0.00E+00 | 64 | 0  | DEL | 0.00E+00 |
| 10-231 | 10 | 106201067 | 106269597 | NONE | Extra sequence included | 106201067 | 106269597 | -10315  | 7.28E-23 | 59 | 53 | DEL | 7.28E-23 |
| 10-235 | 10 | 107197035 | 107248439 | NONE | Extra sequence included | 107197035 | 107248439 | -7618   | 7.28E-23 | 58 | 47 | DEL | 7.28E-23 |
| 10-241 | 10 | 108279134 | 108325960 | NONE | Extra sequence included | 108279134 | 108325960 | -5784   | 7.28E-23 | 76 | 62 | DEL | 7.28E-23 |
| 10-255 | 10 | 110626614 | 110700923 | NONE | Extra sequence included | 110626614 | 110700923 | -74309  | 0.00E+00 | 53 | 0  | DEL | 0.00E+00 |
| 10-258 | 10 | 111188659 | 111227540 | NONE | Extra sequence included | 111188659 | 111227540 | -5177   | 7.28E-23 | 67 | 45 | DEL | 7.28E-23 |
| 10-260 | 10 | 112158697 | 112166983 | NONE | Extra sequence included | 112158697 | 112166983 | -8286   | 0.00E+00 | 71 | 0  | DEL | 0.00E+00 |
| 10-265 | 10 | 112825848 | 112865206 | NONE | Extra sequence included | 112825848 | 112865206 | -39358  | 0.00E+00 | 52 | 0  | DEL | 0.00E+00 |
| 10-270 | 10 | 113464570 | 113553730 | NONE | Extra sequence included | 113464570 | 113553730 | -19280  | 7.28E-23 | 42 | 37 | DEL | 7.28E-23 |
| 10-279 | 10 | 115265370 | 115308547 | NONE | Extra sequence included | 115265370 | 115308547 | -6109   | 7.28E-23 | 42 | 36 | DEL | 7.28E-23 |
| 10-283 | 10 | 116494093 | 116568118 | NONE | Extra sequence included | 116494093 | 116568118 | -19631  | 7.28E-23 | 64 | 48 | DEL | 7.28E-23 |
| 10-289 | 10 | 117344108 | 117366880 | NONE | Extra sequence included | 117344108 | 117366880 | -6005   | 7.28E-23 | 74 | 61 | DEL | 7.28E-23 |
| 10-312 | 10 | 134335382 | 134371480 | NONE | Extra sequence included | 134335382 | 134371480 | -8707   | 7.28E-23 | 75 | 60 | DEL | 7.28E-23 |
| 10-313 | 10 | 134371480 | 134449091 | NONE | Extra sequence included | 134371480 | 134449091 | -12682  | 7.28E-23 | 67 | 46 | DEL | 7.28E-23 |
| 10-321 | 10 | 142125137 | 142238436 | NONE | Extra sequence included | 142125137 | 142238436 | -27678  | 7.28E-23 | 50 | 41 | DEL | 7.28E-23 |
| 10-324 | 10 | 142628463 | 142692663 | NONE | Extra sequence included | 142628463 | 142692663 | -7833   | 7.28E-23 | 60 | 43 | DEL | 7.28E-23 |
| 10-325 | 10 | 142692663 | 142750612 | NONE | Extra sequence included | 142692663 | 142750612 | -9677   | 7.28E-23 | 59 | 41 | DEL | 7.28E-23 |
| 1-2    | 1  | 2127550   | 2150858   | NONE | gap called              | 2127550   | 2150858   | 7711    | 7.12E-23 | 59 | 49 | INS | 7.12E-23 |
| 1-5    | 1  | 2368965   | 2428240   | NONE | gap called              | 2368965   | 2428240   | 12242   | 7.12E-23 | 49 | 39 | INS | 7.12E-23 |
| 1-14   | 1  | 7852044   | 7863623   | NONE | gap called              | 7852044   | 7863623   | 5779    | 7.12E-23 | 77 | 63 | INS | 7.12E-23 |
| 1-19   | 1  | 8559920   | 8592822   | NONE | gap called              | 8559920   | 8592822   | 10358   | 1.01E-22 | 51 | 46 | INS | 1.01E-22 |
| 1-28   | 1  | 9773176   | 9773176   | NONE | gap called              | 9773176   | 9773176   | 63258   | 0.00E+00 | 80 | 0  | INS | 0.00E+00 |
| 1-29   | 1  | 10081846  | 10159094  | NONE | gap called              | 10081846  | 10159094  | 40641   | 1.01E-22 | 24 | 21 | INS | 1.01E-22 |
| 1-39   | 1  | 12627003  | 12665882  | NONE | gap called              | 12627003  | 12665882  | 12374   | 7.12E-23 | 78 | 58 | INS | 7.12E-23 |
| 1-42   | 1  | 12813348  | 12813348  | NONE | gap called              | 12813348  | 12813348  | 7569    | 0.00E+00 | 80 | 0  | INS | 0.00E+00 |
| 1-45   | 1  | 13365763  | 13365763  | NONE | gap called              | 13365763  | 13365763  | 9461    | 0.00E+00 | 82 | 0  | INS | 0.00E+00 |
| 1-53   | 1  | 14299303  | 14335213  | NONE | gap called              | 14299303  | 14335213  | 16153   | 7.12E-23 | 51 | 38 | INS | 7.12E-23 |
| 1-55   | 1  | 14795505  | 14795505  | NONE | gap called              | 14795505  | 14795505  | 25116   | 0.00E+00 | 75 | 0  | INS | 0.00E+00 |
| 1-61   | 1  | 16161846  | 16161846  | NONE | gap called              | 16161846  | 16161846  | 101201  | 0.00E+00 | 60 | 0  | INS | 0.00E+00 |
| 1-69   | 1  | 17799103  | 17832772  | NONE | gap called              | 17799103  | 17832772  | 11666   | 7.12E-23 | 50 | 41 | INS | 7.12E-23 |
| 1-73   | 1  | 18314417  | 18412200  | NONE | gap called              | 18314417  | 18412200  | 9928    | 5.01E-17 | 57 | 37 | INS | 5.01E-17 |
| 1-76   | 1  | 22622291  | 22673519  | NONE | gap called              | 22622291  | 22673519  | 9392    | 7.12E-23 | 54 | 38 | INS | 7.12E-23 |
| 1-77   | 1  | 22961218  | 22961218  | NONE | gap called              | 22961218  | 22961218  | 10088   | 0.00E+00 | 82 | 0  | INS | 0.00E+00 |
| 1-80   | 1  | 24418086  | 24439618  | NONE | gap called              | 24418086  | 24439618  | 5253    | 7.12E-23 | 35 | 30 | INS | 7.12E-23 |
| 1-84   | 1  | 29144446  | 29287716  | NONE | gap called              | 29144446  | 29287716  | 38552   | 7.12E-23 | 45 | 37 | INS | 7.12E-23 |
| 1-85   | 1  | 29372421  | 29410874  | NONE | gap called              | 29372421  | 29410874  | 7736    | 7.12E-23 | 61 | 48 | INS | 7.12E-23 |
| 1-104  | 1  | 36821566  | 36926760  | NONE | gap called              | 36821566  | 36926760  | 10260   | 1.34E-11 | 34 | 26 | INS | 1.34E-11 |
| 1-105  | 1  | 37177784  | 37220461  | NONE | gap called              | 37177784  | 37220461  | 8525    | 7.12E-23 | 61 | 47 | INS | 7.12E-23 |
| 1-116  | 1  | 45976929  | 46016506  | NONE | gap called              | 45976929  | 46016506  | 8814    | 7.12E-23 | 68 | 53 | INS | 7.12E-23 |
| 1-122  | 1  | 50718245  | 50718245  | NONE | gap called              | 50718245  | 50718245  | 30507   | 0.00E+00 | 11 | 0  | INS | 0.00E+00 |
| 1-124  | 1  | 51075847  | 51095669  | NONE | gap called              | 51075847  | 51095669  | 7098    | 7.12E-23 | 66 | 45 | INS | 7.12E-23 |
| 1-125  | 1  | 53182084  | 53236306  | NONE | gap called              | 53182084  | 53236306  | 8581    | 1.03E-10 | 13 | 10 | INS | 1.03E-10 |
| 1-126  | 1  | 53520560  | 53570337  | NONE | gap called              | 53520560  | 53570337  | 7991    | 7.12E-23 | 36 | 28 | INS | 7.12E-23 |
| 1-127  | 1  | 53664451  | 53690669  | NONE | gap called              | 53664451  | 53690669  | 11183   | 7.12E-23 | 50 | 43 | INS | 7.12E-23 |
| 1-140  | 1  | 57127114  | 57167809  | NONE | gap called              | 57127114  | 57167809  | 6889    | 7.12E-23 | 56 | 45 | INS | 7.12E-23 |
| 1-144  | 1  | 57457916  | 57533025  | NONE | gap called              | 57457916  | 57533025  | 35162   | 7.12E-23 | 45 | 35 | INS | 7.12E-23 |
| 1-146  | 1  | 57674694  | 57674694  | NONE | gap called              | 57674694  | 57674694  | 17173   | 0.00E+00 | 55 | 0  | INS | 0.00E+00 |
| 1-153  | 1  | 58493533  | 58521345  | NONE | gap called              | 58493533  | 58521345  | 8473    | 7.12E-23 | 65 | 37 | INS | 7.12E-23 |
| 1-157  | 1  | 59597233  | 59597233  | NONE | gap called              | 59597233  | 59597233  | 27185   | 0.00E+00 | 78 | 0  | INS | 0.00E+00 |
| 1-158  | 1  | 59668818  | 59727268  | NONE | gap called              | 59668818  | 59727268  | 11732   | 7.12E-23 | 70 | 52 | INS | 7.12E-23 |
| 1-165  | 1  | 61359117  | 61402287  | NONE | gap called              | 61359117  | 61402287  | 7087    | 7.12E-23 | 71 | 52 | INS | 7.12E-23 |
| 1-174  | 1  | 63523347  | 63580091  | NONE | gap called              | 63523347  | 63580091  | 9618    | 7.12E-23 | 44 | 34 | INS | 7.12E-23 |
| 1-178  | 1  | 63956066  | 63956066  | NONE | gap called              | 63956066  | 63956066  | 55212   | 0.00E+00 | 66 | 0  | INS | 0.00E+00 |
| 1-183  | 1  | 66118230  | 66249066  | NONE | gap called              | 66118230  | 66249066  | 16397   | 2.11E-21 | 37 | 30 | INS | 2.11E-21 |
| 1-194  | 1  | 72294370  | 72352466  | NONE | gap called              | 72294370  | 72352466  | 5932    | 1.45E-15 | 44 | 36 | INS | 1.45E-15 |
| 1-204  | 1  | 74702576  | 74749358  | NONE | gap called              | 74702576  | 74749358  | 12150   | 7.12E-23 | 68 | 57 | INS | 7.12E-23 |
| 1-205  | 1  | 74926103  | 74926103  | NONE | gap called              | 74926103  | 74926103  | 69391   | 0.00E+00 | 69 | 0  | INS | 0.00E+00 |
| 1-207  | 1  | 75116993  | 75116993  | NONE | gap called              | 75116993  | 75116993  | 5389    | 0.00E+00 | 73 | 0  | INS | 0.00E+00 |
| 1-216  | 1  | 79356615  | 79412644  | NONE | gap called              | 79356615  | 79412644  | 12179   | 7.12E-23 | 52 | 45 | INS | 7.12E-23 |
| 1-217  | 1  | 79555468  | 79592996  | NONE | gap called              | 79555468  | 79592996  | 6890    | 7.12E-23 | 83 | 58 | INS | 7.12E-23 |
| 1-222  | 1  | 80429223  | 80505694  | NONE | gap called              | 80429223  | 80505694  | 8039    | 7.12E-23 | 57 | 54 | INS | 7.12E-23 |
| 1-224  | 1  | 80716675  | 80716675  | NONE | gap called              | 80716675  | 80716675  | 9565    | 0.00E+00 | 76 | 0  | INS | 0.00E+00 |
| 1-233  | 1  | 83105240  | 83143571  | NONE | gap called              | 83105240  | 83143571  | 9562    | 7.12E-23 | 61 | 40 | INS | 7.12E-23 |
| 1-234  | 1  | 83837818  | 83932902  | NONE | gap called              | 83837818  | 83932902  | 31933   | 7.12E-23 | 17 | 13 | INS | 7.12E-23 |
| 1-238  | 1  | 84873096  | 84873096  | NONE | gap called              | 84873096  | 84873096  | 9118    | 0.00E+00 | 64 | 0  | INS | 0.00E+00 |
| 1-244  | 1  | 87960847  | 87977323  | NONE | gap called              | 87960847  | 87977323  | 3073    | 1.01E-22 | 52 | 37 | INS | 1.01E-22 |
| 1-246  | 1  | 88087008  | 88099483  | NONE | gap called              | 88087008  | 88099483  | 5499    | 1.00E-22 | 49 | 28 | INS | 1.00E-22 |
| 1-248  | 1  | 88373351  | 88435297  | NONE | gap called              | 88373351  | 88435297  | 33205   | 1.01E-22 | 43 | 37 | INS | 1.01E-22 |
| 1-254  | 1  | 89469855  | 89514490  | NONE | gap called              | 89469855  | 89514490  | 6542    | 7.12E-23 | 52 | 42 | INS | 7.12E-23 |
| 1-255  | 1  | 90480202  | 90529468  | NONE | gap called              | 90480202  | 90529468  | 9462    | 7.12E-23 | 60 | 48 | INS | 7.12E-23 |
| 1-256  | 1  | 90549973  | 90585948  | NONE | gap called              | 90549973  | 90585948  | 9162    | 7.12E-23 | 63 | 51 | INS | 7.12E-23 |
| 1-273  | 1  | 95814206  | 95875712  | NONE | gap called              | 95814206  | 95875712  | 16273   | 7.12E-23 | 60 | 53 | INS | 7.12E-23 |
| 1-276  | 1  | 96315476  | 96345144  | NONE | gap called              | 96315476  | 96345144  | 5706    | 7.12E-23 | 52 | 42 | INS | 7.12E-23 |
| 1-283  | 1  | 100690178 | 100690178 | NONE | gap called              | 100690178 | 100690178 | 257032  | 0.00E+00 | 27 | 0  | INS | 0.00E+00 |
| 1-291  | 1  | 102233913 | 102256712 | NONE | gap called              | 102233913 | 102256712 | 3995    | 1.01E-22 | 48 | 30 | INS | 1.01E-22 |
| 1-294  | 1  | 102824104 | 102824104 | NONE | gap called              | 102824104 | 102824104 | 42020   | 0.00E+00 | 22 | 0  | INS | 0.00E+00 |
| 1-296  | 1  | 103151823 | 103201669 | NONE | gap called              | 103151823 | 103201669 | 6498    | 6.33E-16 | 30 | 23 | INS | 6.33E-16 |
| 1-299  | 1  | 103940872 | 103956789 | NONE | gap called              | 103940872 | 103956789 | 5320    | 7.12E-23 | 69 | 55 | INS | 7.12E-23 |
| 1-304  | 1  | 104444554 | 104472495 | NONE | gap called              | 104444554 | 104472495 | 10404   | 7.12E-23 | 74 | 58 | INS | 7.12E-23 |
| 1-306  | 1  | 104763540 | 104763540 | NONE | gap called              | 104763540 | 104763540 | 32732   | 0.00E+00 | 66 | 0  | INS | 0.00E+00 |
| 1-307  | 1  | 104980774 | 104980774 | NONE | gap called              | 104980774 | 104980774 | 24008   | 0.00E+00 | 68 | 0  | INS | 0.00E+00 |
| 1-309  | 1  | 105291835 | 105341020 | NONE | gap called              | 105291835 | 105341020 | 11632   | 7.12E-23 | 65 | 51 | INS | 7.12E-23 |
| 1-316  | 1  | 10762378  | 10762378  | NONE | gap called              | 10762378  | 10762378  | 19924   | 9.91E-23 | 43 | 30 | INS | 9.91E-23 |
| 1-317  | 1  | 107922732 | 107974181 | NONE | gap called              | 107922732 | 107974181 | 9542    | 7.12E-23 | 44 | 32 | INS | 7.12E-23 |
| 1-320  | 1  | 108341497 | 108341497 | NONE | gap called              | 108341497 | 108341497 | 12200   | 7.12E-23 | 42 | 28 | INS | 7.12E-23 |
| 1-327  | 1  | 110202699 | 110235308 | NONE | gap called              | 110202699 | 110235308 | 12441   | 7.12E-23 | 67 | 57 | INS | 7.12E-23 |
| 1-329  | 1  | 110367913 | 110383253 | NONE | gap called              | 110367913 |           |         |          |    |    |     |          |

|       |   |           |           |      |            |           |           |        |          |    |    |     |          |
|-------|---|-----------|-----------|------|------------|-----------|-----------|--------|----------|----|----|-----|----------|
| 1-343 | 1 | 112616798 | 112616798 | NONE | gap called | 112616798 | 112616798 | 11674  | 0.00E+00 | 50 | 0  | INS | 0.00E+00 |
| 1-347 | 1 | 113358313 | 113358313 | NONE | gap called | 113358313 | 113358313 | 18349  | 0.00E+00 | 72 | 0  | INS | 0.00E+00 |
| 1-355 | 1 | 115196186 | 115196186 | NONE | gap called | 115196186 | 115196186 | 13969  | 0.00E+00 | 52 | 0  | INS | 0.00E+00 |
| 1-360 | 1 | 118198772 | 118238494 | NONE | gap called | 118198772 | 118238494 | 5664   | 7.12E-23 | 48 | 38 | INS | 7.12E-23 |
| 1-365 | 1 | 119391642 | 119409093 | NONE | gap called | 119391642 | 119409093 | 11284  | 7.12E-23 | 58 | 46 | INS | 7.12E-23 |
| 1-379 | 1 | 123834043 | 123834043 | NONE | gap called | 123834043 | 123834043 | 168300 | 0.00E+00 | 16 | 0  | INS | 0.00E+00 |
| 1-390 | 1 | 126853583 | 126879224 | NONE | gap called | 126853583 | 126879224 | 9483   | 7.12E-23 | 68 | 54 | INS | 7.12E-23 |
| 1-392 | 1 | 127383203 | 127407845 | NONE | gap called | 127383203 | 127407845 | 6440   | 7.12E-23 | 65 | 57 | INS | 7.12E-23 |
| 1-403 | 1 | 131182847 | 131209783 | NONE | gap called | 131182847 | 131209783 | 12915  | 9.96E-23 | 42 | 34 | INS | 9.96E-23 |
| 1-412 | 1 | 137438739 | 137478136 | NONE | gap called | 137438739 | 137478136 | 8160   | 7.12E-23 | 87 | 72 | INS | 7.12E-23 |
| 1-421 | 1 | 140963258 | 141017200 | NONE | gap called | 140963258 | 141017200 | 23981  | 7.12E-23 | 33 | 19 | INS | 7.12E-23 |
| 1-423 | 1 | 141507622 | 141626496 | NONE | gap called | 141507622 | 141626496 | 12071  | 1.58E-08 | 21 | 17 | INS | 1.58E-08 |
| 1-427 | 1 | 142585500 | 142585500 | NONE | gap called | 142585500 | 142585500 | 31378  | 0.00E+00 | 24 | 0  | INS | 0.00E+00 |
| 1-431 | 1 | 143762999 | 143792310 | NONE | gap called | 143762999 | 143792310 | 8002   | 7.12E-23 | 69 | 50 | INS | 7.12E-23 |
| 1-442 | 1 | 149527244 | 149568138 | NONE | gap called | 149527244 | 149568138 | 9514   | 7.12E-23 | 39 | 30 | INS | 7.12E-23 |
| 1-448 | 1 | 154029068 | 154029068 | NONE | gap called | 154029068 | 154029068 | 11274  | 0.00E+00 | 80 | 0  | INS | 0.00E+00 |
| 1-458 | 1 | 156464922 | 156515724 | NONE | gap called | 156464922 | 156515724 | 5223   | 3.77E-20 | 62 | 47 | INS | 3.77E-20 |
| 1-462 | 1 | 157504232 | 157590088 | NONE | gap called | 157504232 | 157590088 | 9796   | 8.84E-18 | 39 | 31 | INS | 8.84E-18 |
| 1-469 | 1 | 158846041 | 158891182 | NONE | gap called | 158846041 | 158891182 | 11898  | 7.12E-23 | 45 | 31 | INS | 7.12E-23 |
| 1-474 | 1 | 160113336 | 160148371 | NONE | gap called | 160113336 | 160148371 | 11583  | 7.12E-23 | 28 | 21 | INS | 7.12E-23 |
| 1-482 | 1 | 162064054 | 162064054 | NONE | gap called | 162064054 | 162064054 | 74623  | 0.00E+00 | 58 | 0  | INS | 0.00E+00 |
| 1-483 | 1 | 162576488 | 162601319 | NONE | gap called | 162576488 | 162601319 | 5051   | 7.12E-23 | 62 | 52 | INS | 7.12E-23 |
| 1-484 | 1 | 162733125 | 162754943 | NONE | gap called | 162733125 | 162754943 | 10881  | 7.12E-23 | 63 | 56 | INS | 7.12E-23 |
| 1-486 | 1 | 163093992 | 163093992 | NONE | gap called | 163093992 | 163093992 | 15336  | 0.00E+00 | 59 | 0  | INS | 0.00E+00 |
| 1-487 | 1 | 163148025 | 163176365 | NONE | gap called | 163148025 | 163176365 | 6879   | 7.12E-23 | 56 | 48 | INS | 7.12E-23 |
| 1-490 | 1 | 163825038 | 163838892 | NONE | gap called | 163825038 | 163838892 | 5657   | 7.12E-23 | 58 | 42 | INS | 7.12E-23 |
| 1-494 | 1 | 164895058 | 164922267 | NONE | gap called | 164895058 | 164922267 | 5293   | 7.12E-23 | 52 | 47 | INS | 7.12E-23 |
| 1-498 | 1 | 165823492 | 165866407 | NONE | gap called | 165823492 | 165866407 | 5844   | 7.12E-23 | 92 | 79 | INS | 7.12E-23 |
| 1-509 | 1 | 168248220 | 168248220 | NONE | gap called | 168248220 | 168248220 | 16307  | 0.00E+00 | 53 | 0  | INS | 0.00E+00 |
| 1-516 | 1 | 171039901 | 171088492 | NONE | gap called | 171039901 | 171088492 | 14487  | 7.12E-23 | 32 | 23 | INS | 7.12E-23 |
| 1-524 | 1 | 172735345 | 172805770 | NONE | gap called | 172735345 | 172805770 | 15606  | 7.12E-23 | 27 | 17 | INS | 7.12E-23 |
| 1-547 | 1 | 183325428 | 183337507 | NONE | gap called | 183325428 | 183337507 | 5981   | 7.12E-23 | 65 | 48 | INS | 7.12E-23 |
| 1-548 | 1 | 183618165 | 183663946 | NONE | gap called | 183618165 | 183663946 | 19664  | 9.98E-23 | 48 | 38 | INS | 9.98E-23 |
| 1-549 | 1 | 183903350 | 183903350 | NONE | gap called | 183903350 | 183903350 | 31060  | 0.00E+00 | 55 | 0  | INS | 0.00E+00 |
| 1-550 | 1 | 184036065 | 184083536 | NONE | gap called | 184036065 | 184083536 | 18715  | 9.76E-23 | 37 | 29 | INS | 9.76E-23 |
| 1-551 | 1 | 184203771 | 184368798 | NONE | gap called | 184203771 | 184368798 | 21319  | 1.18E-16 | 31 | 21 | INS | 1.18E-16 |
| 1-565 | 1 | 192428206 | 192428206 | NONE | gap called | 192428206 | 192428206 | 68970  | 0.00E+00 | 69 | 0  | INS | 0.00E+00 |
| 1-583 | 1 | 196564089 | 196608353 | NONE | gap called | 196564089 | 196608353 | 7937   | 7.12E-23 | 54 | 39 | INS | 7.12E-23 |
| 1-587 | 1 | 197229894 | 197261222 | NONE | gap called | 197229894 | 197261222 | 7209   | 7.12E-23 | 66 | 45 | INS | 7.12E-23 |
| 1-601 | 1 | 205261494 | 205261494 | NONE | gap called | 205261494 | 205261494 | 31979  | 0.00E+00 | 80 | 0  | INS | 0.00E+00 |
| 1-603 | 1 | 205629018 | 205661818 | NONE | gap called | 205629018 | 205661818 | 9226   | 7.12E-23 | 61 | 49 | INS | 7.12E-23 |
| 1-606 | 1 | 206124781 | 206143687 | NONE | gap called | 206124781 | 206143687 | 10773  | 1.01E-22 | 61 | 48 | INS | 1.01E-22 |
| 1-609 | 1 | 206910626 | 206964929 | NONE | gap called | 206910626 | 206964929 | 29365  | 9.90E-23 | 46 | 39 | INS | 9.90E-23 |
| 1-612 | 1 | 207346383 | 207346383 | NONE | gap called | 207346383 | 207346383 | 103659 | 0.00E+00 | 58 | 0  | INS | 0.00E+00 |
| 1-613 | 1 | 207641822 | 207697133 | NONE | gap called | 207641822 | 207697133 | 6955   | 7.12E-23 | 61 | 51 | INS | 7.12E-23 |
| 1-624 | 1 | 211292852 | 211292852 | NONE | gap called | 211292852 | 211292852 | 45119  | 0.00E+00 | 89 | 0  | INS | 0.00E+00 |
| 1-634 | 1 | 212964989 | 213013505 | NONE | gap called | 212964989 | 213013505 | 9300   | 7.12E-23 | 58 | 40 | INS | 7.12E-23 |
| 1-654 | 1 | 220224113 | 220253746 | NONE | gap called | 220224113 | 220253746 | 16487  | 7.12E-23 | 50 | 41 | INS | 7.12E-23 |
| 1-658 | 1 | 221408757 | 221504661 | NONE | gap called | 221408757 | 221504661 | 12169  | 7.12E-23 | 36 | 32 | INS | 7.12E-23 |
| 1-660 | 1 | 223183878 | 223204785 | NONE | gap called | 223183878 | 223204785 | 5152   | 7.12E-23 | 38 | 36 | INS | 7.12E-23 |
| 1-661 | 1 | 223915949 | 223915949 | NONE | gap called | 223915949 | 223915949 | 14451  | 0.00E+00 | 78 | 0  | INS | 0.00E+00 |
| 1-670 | 1 | 226244745 | 226264939 | NONE | gap called | 226244745 | 226264939 | 5440   | 7.12E-23 | 71 | 63 | INS | 7.12E-23 |
| 1-673 | 1 | 226904235 | 226904235 | NONE | gap called | 226904235 | 226904235 | 6060   | 0.00E+00 | 45 | 0  | INS | 0.00E+00 |
| 1-674 | 1 | 227212020 | 227250340 | NONE | gap called | 227212020 | 227250340 | 9442   | 7.12E-23 | 61 | 54 | INS | 7.12E-23 |
| 1-678 | 1 | 228802476 | 228858477 | NONE | gap called | 228802476 | 228858477 | 5612   | 3.28E-15 | 39 | 36 | INS | 3.28E-15 |
| 1-679 | 1 | 228940813 | 228999275 | NONE | gap called | 228940813 | 228999275 | 8714   | 7.12E-23 | 39 | 28 | INS | 7.12E-23 |
| 1-682 | 1 | 229922943 | 230042613 | NONE | gap called | 229922943 | 230042613 | 20957  | 7.12E-23 | 31 | 24 | INS | 7.12E-23 |
| 1-684 | 1 | 230444924 | 230531937 | NONE | gap called | 230444924 | 230531937 | 9896   | 7.12E-23 | 67 | 58 | INS | 7.12E-23 |
| 1-700 | 1 | 234760579 | 234790137 | NONE | gap called | 234760579 | 234790137 | 11015  | 7.12E-23 | 60 | 47 | INS | 7.12E-23 |
| 1-702 | 1 | 235264240 | 235287657 | NONE | gap called | 235264240 | 235287657 | 7201   | 7.12E-23 | 34 | 23 | INS | 7.12E-23 |
| 1-706 | 1 | 237874216 | 237912790 | NONE | gap called | 237874216 | 237912790 | 6313   | 7.12E-23 | 52 | 37 | INS | 7.12E-23 |
| 1-707 | 1 | 238073739 | 238100574 | NONE | gap called | 238073739 | 238100574 | 5100   | 7.12E-23 | 65 | 54 | INS | 7.12E-23 |
| 1-713 | 1 | 242633254 | 242668396 | NONE | gap called | 242633254 | 242668396 | 6807   | 7.12E-23 | 57 | 50 | INS | 7.12E-23 |
| 1-718 | 1 | 246097490 | 246097490 | NONE | gap called | 246097490 | 246097490 | 356073 | 0.00E+00 | 13 | 0  | INS | 0.00E+00 |
| 1-719 | 1 | 246552665 | 246583133 | NONE | gap called | 246552665 | 246583133 | 18564  | 7.12E-23 | 71 | 58 | INS | 7.12E-23 |
| 1-720 | 1 | 246591806 | 246610619 | NONE | gap called | 246591806 | 246610619 | 5246   | 7.12E-23 | 82 | 67 | INS | 7.12E-23 |
| 1-724 | 1 | 247092254 | 247121596 | NONE | gap called | 247092254 | 247121596 | 5800   | 7.12E-23 | 91 | 72 | INS | 7.12E-23 |
| 1-741 | 1 | 255067057 | 255094248 | NONE | gap called | 255067057 | 255094248 | 6635   | 7.12E-23 | 66 | 53 | INS | 7.12E-23 |
| 1-751 | 1 | 261692893 | 261750585 | NONE | gap called | 261692893 | 261750585 | 6187   | 7.12E-23 | 72 | 55 | INS | 7.12E-23 |
| 1-754 | 1 | 265386285 | 265386285 | NONE | gap called | 265386285 | 265386285 | 41146  | 0.00E+00 | 89 | 0  | INS | 0.00E+00 |
| 1-756 | 1 | 266456953 | 266484267 | NONE | gap called | 266456953 | 266484267 | 5333   | 7.12E-23 | 79 | 69 | INS | 7.12E-23 |
| 1-757 | 1 | 266577895 | 266626589 | NONE | gap called | 266577895 | 266626589 | 5382   | 7.12E-23 | 60 | 48 | INS | 7.12E-23 |
| 1-758 | 1 | 266654982 | 266674518 | NONE | gap called | 266654982 | 266674518 | 9506   | 7.12E-23 | 57 | 48 | INS | 7.12E-23 |
| 1-762 | 1 | 267607145 | 267622323 | NONE | gap called | 267607145 | 267622323 | 8622   | 7.12E-23 | 81 | 59 | INS | 7.12E-23 |
| 1-770 | 1 | 272307819 | 272351493 | NONE | gap called | 272307819 | 272351493 | 6989   | 7.12E-23 | 50 | 43 | INS | 7.12E-23 |
| 1-785 | 1 | 278375203 | 278390617 | NONE | gap called | 278375203 | 278390617 | 106980 | 1.01E-22 | 49 | 34 | INS | 1.01E-22 |
| 1-788 | 1 | 283332606 | 283371461 | NONE | gap called | 283332606 | 283371461 | 12252  | 7.12E-23 | 63 | 63 | INS | 7.12E-23 |
| 1-793 | 1 | 284880674 | 284928616 | NONE | gap called | 284880674 | 284928616 | 8124   | 7.12E-23 | 64 | 44 | INS | 7.12E-23 |
| 1-797 | 1 | 288412030 | 288412030 | NONE | gap called | 288412030 | 288412030 | 18232  | 0.00E+00 | 52 | 0  | INS | 0.00E+00 |
| 1-803 | 1 | 289793793 | 289793793 | NONE | gap called | 289793793 | 289793793 | 26475  | 0.00E+00 | 78 | 0  | INS | 0.00E+00 |
| 1-807 | 1 | 291053746 | 291053746 | NONE | gap called | 291053746 | 291053746 | 69476  | 0.00E+00 | 70 | 0  | INS | 0.00E+00 |
| 1-815 | 1 | 299147475 | 299179000 | NONE | gap called | 299147475 | 299179000 | 6312   | 7.12E-23 | 67 | 51 | INS | 7.12E-23 |
| 1-816 | 1 | 299470329 | 299500226 | NONE | gap called | 299470329 | 299500226 | 6043   | 7.12E-23 | 56 | 45 | INS | 7.12E-23 |
| 2-3   | 2 | 1986716   | 2019891   | NONE | gap called | 1986716   | 2019891   | 5007   | 7.27E-23 | 55 | 40 | INS | 7.27E-23 |
| 2-6   | 2 | 5194600   | 5247793   | NONE | gap called | 5194600   | 5247793   | 7145   | 7.27E-23 | 55 | 51 | INS | 7.27E-23 |
| 2-8   | 2 |           |           |      |            |           |           |        |          |    |    |     |          |



|       |   |           |           |      |            |           |           |        |          |    |    |     |          |
|-------|---|-----------|-----------|------|------------|-----------|-----------|--------|----------|----|----|-----|----------|
| 2-37  | 2 | 19017656  | 19017656  | NONE | gap called | 19017656  | 19017656  | 16026  | 0.00E+00 | 47 | 0  | INS | 0.00E+00 |
| 2-40  | 2 | 19797316  | 19833057  | NONE | gap called | 19797316  | 19833057  | 7644   | 7.27E-23 | 57 | 47 | INS | 7.27E-23 |
| 2-45  | 2 | 20972824  | 21055828  | NONE | gap called | 20972824  | 21055828  | 9631   | 3.20E-12 | 27 | 20 | INS | 3.20E-12 |
| 2-46  | 2 | 21157399  | 21157399  | NONE | gap called | 21157399  | 21157399  | 7148   | 3.57E-13 | 34 | 24 | INS | 3.57E-13 |
| 2-54  | 2 | 23683923  | 23722586  | NONE | gap called | 23683923  | 23722586  | 8190   | 7.27E-23 | 50 | 41 | INS | 7.27E-23 |
| 2-71  | 2 | 27923113  | 27970333  | NONE | gap called | 27923113  | 27970333  | 13687  | 7.27E-23 | 72 | 58 | INS | 7.27E-23 |
| 2-76  | 2 | 31223620  | 31247845  | NONE | gap called | 31223620  | 31247845  | 12151  | 7.27E-23 | 47 | 35 | INS | 7.27E-23 |
| 2-77  | 2 | 31388493  | 31422484  | NONE | gap called | 31388493  | 31422484  | 7435   | 7.27E-23 | 58 | 46 | INS | 7.27E-23 |
| 2-93  | 2 | 36699375  | 36741592  | NONE | gap called | 36699375  | 36741592  | 7104   | 7.27E-23 | 46 | 41 | INS | 7.27E-23 |
| 2-98  | 2 | 38991586  | 38991586  | NONE | gap called | 38991586  | 38991586  | 7342   | 0.00E+00 | 99 | 0  | INS | 0.00E+00 |
| 2-101 | 2 | 39516675  | 39616263  | NONE | gap called | 39516675  | 39616263  | 16433  | 7.27E-23 | 27 | 22 | INS | 7.27E-23 |
| 2-102 | 2 | 39736510  | 39742500  | NONE | gap called | 39736510  | 39742500  | 6978   | 9.90E-23 | 22 | 15 | INS | 9.90E-23 |
| 2-104 | 2 | 40226371  | 40260045  | NONE | gap called | 40226371  | 40260045  | 8330   | 7.27E-23 | 55 | 45 | INS | 7.27E-23 |
| 2-110 | 2 | 45010700  | 45038995  | NONE | gap called | 45010700  | 45038995  | 21354  | 7.27E-23 | 46 | 36 | INS | 7.27E-23 |
| 2-116 | 2 | 46021200  | 46036398  | NONE | gap called | 46021200  | 46036398  | 7076   | 7.27E-23 | 46 | 42 | INS | 7.27E-23 |
| 2-118 | 2 | 46631152  | 46665604  | NONE | gap called | 46631152  | 46665604  | 7999   | 7.27E-23 | 44 | 37 | INS | 7.27E-23 |
| 2-119 | 2 | 46689532  | 46743973  | NONE | gap called | 46689532  | 46743973  | 24961  | 7.27E-23 | 49 | 30 | INS | 7.27E-23 |
| 2-120 | 2 | 46796336  | 46796336  | NONE | gap called | 46796336  | 46796336  | 14691  | 0.00E+00 | 65 | 0  | INS | 0.00E+00 |
| 2-124 | 2 | 47725058  | 47752583  | NONE | gap called | 47725058  | 47752583  | 5172   | 7.27E-23 | 46 | 41 | INS | 7.27E-23 |
| 2-128 | 2 | 48531354  | 48606892  | NONE | gap called | 48531354  | 48606892  | 12220  | 7.27E-23 | 34 | 24 | INS | 7.27E-23 |
| 2-131 | 2 | 49163633  | 49174432  | NONE | gap called | 49163633  | 49174432  | 6479   | 9.85E-23 | 61 | 53 | INS | 9.85E-23 |
| 2-138 | 2 | 53391185  | 53417300  | NONE | gap called | 53391185  | 53417300  | 6083   | 7.27E-23 | 38 | 29 | INS | 7.27E-23 |
| 2-140 | 2 | 53728897  | 53770159  | NONE | gap called | 53728897  | 53770159  | 10618  | 7.27E-23 | 64 | 49 | INS | 7.27E-23 |
| 2-144 | 2 | 57862475  | 57908834  | NONE | gap called | 57862475  | 57908834  | 5574   | 7.27E-23 | 67 | 49 | INS | 7.27E-23 |
| 2-154 | 2 | 62653788  | 62677883  | NONE | gap called | 62653788  | 62677883  | 6270   | 7.27E-23 | 76 | 54 | INS | 7.27E-23 |
| 2-158 | 2 | 65977854  | 66007803  | NONE | gap called | 65977854  | 66007803  | 5344   | 7.27E-23 | 51 | 43 | INS | 7.27E-23 |
| 2-163 | 2 | 67211712  | 67252241  | NONE | gap called | 67211712  | 67252241  | 16317  | 7.27E-23 | 59 | 46 | INS | 7.27E-23 |
| 2-166 | 2 | 67485494  | 67506427  | NONE | gap called | 67485494  | 67506427  | 11348  | 7.27E-23 | 90 | 77 | INS | 7.27E-23 |
| 2-168 | 2 | 67823101  | 67823101  | NONE | gap called | 67823101  | 67823101  | 11010  | 0.00E+00 | 82 | 0  | INS | 0.00E+00 |
| 2-186 | 2 | 72329332  | 72336054  | NONE | gap called | 72329332  | 72336054  | 5274   | 7.27E-23 | 61 | 55 | INS | 7.27E-23 |
| 2-188 | 2 | 72590355  | 72590355  | NONE | gap called | 72590355  | 72590355  | 77704  | 0.00E+00 | 43 | 0  | INS | 0.00E+00 |
| 2-189 | 2 | 73016739  | 73058375  | NONE | gap called | 73016739  | 73058375  | 5131   | 7.90E-14 | 30 | 23 | INS | 7.90E-14 |
| 2-195 | 2 | 75040381  | 75102115  | NONE | gap called | 75040381  | 75102115  | 6669   | 1.46E-07 | 23 | 14 | INS | 1.46E-07 |
| 2-200 | 2 | 76082574  | 76105125  | NONE | gap called | 76082574  | 76105125  | 5067   | 7.27E-23 | 44 | 40 | INS | 7.27E-23 |
| 2-207 | 2 | 80431921  | 80466579  | NONE | gap called | 80431921  | 80466579  | 7830   | 7.27E-23 | 44 | 32 | INS | 7.27E-23 |
| 2-226 | 2 | 86415893  | 86415893  | NONE | gap called | 86415893  | 86415893  | 70463  | 0.00E+00 | 39 | 0  | INS | 0.00E+00 |
| 2-228 | 2 | 87140277  | 87200827  | NONE | gap called | 87140277  | 87200827  | 10809  | 7.27E-23 | 45 | 42 | INS | 7.27E-23 |
| 2-229 | 2 | 87268305  | 87268305  | NONE | gap called | 87268305  | 87268305  | 18743  | 0.00E+00 | 48 | 0  | INS | 0.00E+00 |
| 2-232 | 2 | 88137342  | 88184534  | NONE | gap called | 88137342  | 88184534  | 7723   | 7.27E-23 | 41 | 31 | INS | 7.27E-23 |
| 2-236 | 2 | 92168704  | 92215107  | NONE | gap called | 92168704  | 92215107  | 6853   | 7.27E-23 | 49 | 32 | INS | 7.27E-23 |
| 2-238 | 2 | 92895683  | 92895683  | NONE | gap called | 92895683  | 92895683  | 72448  | 0.00E+00 | 59 | 0  | INS | 0.00E+00 |
| 2-241 | 2 | 93423533  | 93440302  | NONE | gap called | 93423533  | 93440302  | 6768   | 7.27E-23 | 54 | 43 | INS | 7.27E-23 |
| 2-253 | 2 | 96706609  | 96706609  | NONE | gap called | 96706609  | 96706609  | 30303  | 0.00E+00 | 55 | 0  | INS | 0.00E+00 |
| 2-255 | 2 | 97422352  | 97456628  | NONE | gap called | 97422352  | 97456628  | 7118   | 7.27E-23 | 48 | 39 | INS | 7.27E-23 |
| 2-259 | 2 | 98214698  | 98214698  | NONE | gap called | 98214698  | 98214698  | 12436  | 0.00E+00 | 66 | 0  | INS | 0.00E+00 |
| 2-260 | 2 | 98409281  | 98497357  | NONE | gap called | 98409281  | 98497357  | 14777  | 7.27E-23 | 48 | 32 | INS | 7.27E-23 |
| 2-261 | 2 | 98804442  | 98804442  | NONE | gap called | 98804442  | 98804442  | 70684  | 0.00E+00 | 47 | 0  | INS | 0.00E+00 |
| 2-264 | 2 | 99659497  | 99659497  | NONE | gap called | 99659497  | 99659497  | 19051  | 0.00E+00 | 41 | 0  | INS | 0.00E+00 |
| 2-267 | 2 | 100491316 | 100554600 | NONE | gap called | 100491316 | 100554600 | 108973 | 9.67E-23 | 24 | 21 | INS | 9.67E-23 |
| 2-281 | 2 | 112773646 | 112791462 | NONE | gap called | 112773646 | 112791462 | 5316   | 7.27E-23 | 75 | 50 | INS | 7.27E-23 |
| 2-289 | 2 | 198936057 | 198962352 | NONE | gap called | 198936057 | 198962352 | 7156   | 7.27E-23 | 58 | 50 | INS | 7.27E-23 |
| 2-291 | 2 | 199310833 | 199329496 | NONE | gap called | 199310833 | 199329496 | 7349   | 7.27E-23 | 83 | 57 | INS | 7.27E-23 |
| 2-301 | 2 | 204837163 | 204841507 | NONE | gap called | 204837163 | 204841507 | 6943   | 9.93E-23 | 31 | 19 | INS | 9.93E-23 |
| 2-307 | 2 | 209035977 | 209083161 | NONE | gap called | 209035977 | 209083161 | 7952   | 7.27E-23 | 42 | 37 | INS | 7.27E-23 |
| 2-313 | 2 | 211582454 | 211615348 | NONE | gap called | 211582454 | 211615348 | 6597   | 7.27E-23 | 47 | 35 | INS | 7.27E-23 |
| 2-316 | 2 | 211947418 | 211995420 | NONE | gap called | 211947418 | 211995420 | 7019   | 7.27E-23 | 44 | 36 | INS | 7.27E-23 |
| 2-320 | 2 | 216561076 | 216561076 | NONE | gap called | 216561076 | 216561076 | 60404  | 0.00E+00 | 78 | 0  | INS | 0.00E+00 |
| 2-322 | 2 | 216755478 | 216860391 | NONE | gap called | 216755478 | 216860391 | 16975  | 7.27E-23 | 60 | 49 | INS | 7.27E-23 |
| 2-326 | 2 | 219061370 | 219075700 | NONE | gap called | 219061370 | 219075700 | 5364   | 7.27E-23 | 81 | 49 | INS | 7.27E-23 |
| 2-327 | 2 | 219275807 | 219275807 | NONE | gap called | 219275807 | 219275807 | 11865  | 0.00E+00 | 78 | 0  | INS | 0.00E+00 |
| 2-328 | 2 | 219356088 | 219356088 | NONE | gap called | 219356088 | 219356088 | 19546  | 0.00E+00 | 76 | 0  | INS | 0.00E+00 |
| 2-329 | 2 | 219576306 | 219631723 | NONE | gap called | 219576306 | 219631723 | 23187  | 7.27E-23 | 67 | 43 | INS | 7.27E-23 |
| 2-333 | 2 | 220726518 | 220774116 | NONE | gap called | 220726518 | 220774116 | 6353   | 7.27E-23 | 44 | 36 | INS | 7.27E-23 |
| 2-336 | 2 | 221335873 | 221374326 | NONE | gap called | 221335873 | 221374326 | 18261  | 9.85E-23 | 57 | 45 | INS | 9.85E-23 |
| 2-344 | 2 | 227631232 | 227657482 | NONE | gap called | 227631232 | 227657482 | 7826   | 7.27E-23 | 40 | 28 | INS | 7.27E-23 |
| 2-349 | 2 | 229090587 | 229137021 | NONE | gap called | 229090587 | 229137021 | 8319   | 7.27E-23 | 61 | 29 | INS | 7.27E-23 |
| 3-8   | 3 | 4797664   | 4837035   | NONE | gap called | 4797664   | 4837035   | 10524  | 7.24E-23 | 25 | 20 | INS | 7.24E-23 |
| 3-11  | 3 | 12244314  | 12265893  | NONE | gap called | 12244314  | 12265893  | 11951  | 7.24E-23 | 76 | 52 | INS | 7.24E-23 |
| 3-15  | 3 | 17605347  | 17654036  | NONE | gap called | 17605347  | 17654036  | 5148   | 7.24E-23 | 77 | 65 | INS | 7.24E-23 |
| 3-16  | 3 | 17707817  | 17736841  | NONE | gap called | 17707817  | 17736841  | 7426   | 7.24E-23 | 75 | 65 | INS | 7.24E-23 |
| 3-21  | 3 | 18725384  | 18765274  | NONE | gap called | 18725384  | 18765274  | 10836  | 7.24E-23 | 47 | 35 | INS | 7.24E-23 |
| 3-22  | 3 | 23499184  | 23530893  | NONE | gap called | 23499184  | 23530893  | 5505   | 7.24E-23 | 60 | 44 | INS | 7.24E-23 |
| 3-24  | 3 | 25769612  | 25769612  | NONE | gap called | 25769612  | 25769612  | 6309   | 0.00E+00 | 65 | 0  | INS | 0.00E+00 |
| 3-25  | 3 | 26051967  | 26093336  | NONE | gap called | 26051967  | 26093336  | 9556   | 7.24E-23 | 62 | 49 | INS | 7.24E-23 |
| 3-26  | 3 | 26411796  | 26482067  | NONE | gap called | 26411796  | 26482067  | 8643   | 2.66E-22 | 51 | 37 | INS | 2.66E-22 |
| 3-32  | 3 | 28324860  | 28324860  | NONE | gap called | 28324860  | 28324860  | 28394  | 0.00E+00 | 79 | 0  | INS | 0.00E+00 |
| 3-34  | 3 | 28465088  | 28495715  | NONE | gap called | 28465088  | 28495715  | 40097  | 1.08E-22 | 79 | 64 | INS | 1.08E-22 |
| 3-35  | 3 | 28812714  | 28859100  | NONE | gap called | 28812714  | 28859100  | 7485   | 7.24E-23 | 55 | 35 | INS | 7.24E-23 |
| 3-39  | 3 | 29746354  | 29771290  | NONE | gap called | 29746354  | 29771290  | 6586   | 7.24E-23 | 63 | 49 | INS | 7.24E-23 |
| 3-45  | 3 | 31498723  | 31577560  | NONE | gap called | 31498723  | 31577560  | 12718  | 3.61E-18 | 22 | 17 | INS | 3.61E-18 |
| 3-50  | 3 | 32696448  | 32784205  | NONE | gap called | 32696448  | 32784205  | 9354   | 4.02E-09 | 26 | 18 | INS | 4.02E-09 |
| 3-51  | 3 | 33106332  | 33164742  | NONE | gap called | 33106332  | 33164742  | 6367   | 3.61E-18 | 52 | 39 | INS | 3.61E-18 |
| 3-55  | 3 | 34026868  | 34099650  | NONE | gap called | 34026868  | 34099650  | 19979  | 7.24E-23 | 32 | 28 | INS | 7.24E-23 |
| 3-64  | 3 | 36782280  | 36853292  | NONE | gap called | 36782280  | 36853292  | 12198  | 7.24E-23 | 42 | 36 | INS | 7.24E-23 |
| 3-65  | 3 | 36873224  | 36897050  | NONE | gap called | 36873224  | 36897050  | 35656  | 7.24E-23 | 44 | 35 | INS | 7.24E-23 |
| 3-69  | 3 | 37988532  | 38016487  | NONE | gap called | 37988532  | 38016487  | 6543   | 7.24E-23 | 79 | 54 | INS | 7.24E-23 |
| 3-70  | 3 | 38042365  | 38058428  | NONE | gap called | 38042365  | 38058428  | 6302   | 7.24E-23 | 74 | 59 | INS | 7.24E-23 |
| 3-72  | 3 | 38        |           |      |            |           |           |        |          |    |    |     |          |

|       |   |           |           |      |            |           |           |        |          |    |    |     |          |
|-------|---|-----------|-----------|------|------------|-----------|-----------|--------|----------|----|----|-----|----------|
| 3-98  | 3 | 44508024  | 44595250  | NONE | gap called | 44508024  | 44595250  | 20980  | 7.24E-23 | 40 | 31 | INS | 7.24E-23 |
| 3-101 | 3 | 45882550  | 45882550  | NONE | gap called | 45882550  | 45882550  | 28243  | 0.00E+00 | 85 | 0  | INS | 0.00E+00 |
| 3-105 | 3 | 46417324  | 46417324  | NONE | gap called | 46417324  | 46417324  | 39819  | 0.00E+00 | 67 | 0  | INS | 0.00E+00 |
| 3-106 | 3 | 46477616  | 46495468  | NONE | gap called | 46477616  | 46495468  | 36758  | 7.24E-23 | 53 | 38 | INS | 7.24E-23 |
| 3-117 | 3 | 50098959  | 50154469  | NONE | gap called | 50098959  | 50154469  | 8512   | 7.24E-23 | 42 | 33 | INS | 7.24E-23 |
| 3-121 | 3 | 50764433  | 50787166  | NONE | gap called | 50764433  | 50787166  | 3637   | 1.07E-22 | 69 | 50 | INS | 1.07E-22 |
| 3-123 | 3 | 50968781  | 50989019  | NONE | gap called | 50968781  | 50989019  | 6516   | 7.24E-23 | 61 | 49 | INS | 7.24E-23 |
| 3-132 | 3 | 53370708  | 53411251  | NONE | gap called | 53370708  | 53411251  | 9383   | 7.24E-23 | 40 | 31 | INS | 7.24E-23 |
| 3-136 | 3 | 54333990  | 54333990  | NONE | gap called | 54333990  | 54333990  | 34802  | 0.00E+00 | 65 | 0  | INS | 0.00E+00 |
| 3-139 | 3 | 55680675  | 55680675  | NONE | gap called | 55680675  | 55680675  | 11312  | 0.00E+00 | 77 | 0  | INS | 0.00E+00 |
| 3-143 | 3 | 56844500  | 56868319  | NONE | gap called | 56844500  | 56868319  | 11276  | 7.24E-23 | 43 | 36 | INS | 7.24E-23 |
| 3-148 | 3 | 59991169  | 60045401  | NONE | gap called | 59991169  | 60045401  | 6420   | 2.92E-12 | 34 | 22 | INS | 2.92E-12 |
| 3-155 | 3 | 63738438  | 63750240  | NONE | gap called | 63738438  | 63750240  | 28701  | 1.08E-22 | 68 | 54 | INS | 1.08E-22 |
| 3-157 | 3 | 64145508  | 64199464  | NONE | gap called | 64145508  | 64199464  | 63429  | 1.07E-22 | 36 | 26 | INS | 1.07E-22 |
| 3-163 | 3 | 65438109  | 65499588  | NONE | gap called | 65438109  | 65499588  | 11373  | 7.24E-23 | 27 | 18 | INS | 7.24E-23 |
| 3-166 | 3 | 66208171  | 66208171  | NONE | gap called | 66208171  | 66208171  | 6473   | 0.00E+00 | 64 | 0  | INS | 0.00E+00 |
| 3-186 | 3 | 77407901  | 77421712  | NONE | gap called | 77407901  | 77421712  | 8579   | 7.24E-23 | 50 | 40 | INS | 7.24E-23 |
| 3-189 | 3 | 78465139  | 78520496  | NONE | gap called | 78465139  | 78520496  | 5648   | 6.02E-19 | 65 | 47 | INS | 6.02E-19 |
| 3-190 | 3 | 78561070  | 78561070  | NONE | gap called | 78561070  | 78561070  | 29248  | 0.00E+00 | 62 | 0  | INS | 0.00E+00 |
| 3-193 | 3 | 79196632  | 79196632  | NONE | gap called | 79196632  | 79196632  | 20823  | 0.00E+00 | 70 | 0  | INS | 0.00E+00 |
| 3-203 | 3 | 81717016  | 81735918  | NONE | gap called | 81717016  | 81735918  | 5832   | 7.24E-23 | 74 | 42 | INS | 7.24E-23 |
| 3-211 | 3 | 85486095  | 85533002  | NONE | gap called | 85486095  | 85533002  | 6929   | 7.24E-23 | 64 | 48 | INS | 7.24E-23 |
| 3-215 | 3 | 87624008  | 87666324  | NONE | gap called | 87624008  | 87666324  | 6866   | 7.24E-23 | 52 | 44 | INS | 7.24E-23 |
| 3-229 | 3 | 96696946  | 96765654  | NONE | gap called | 96696946  | 96765654  | 10750  | 7.24E-23 | 33 | 27 | INS | 7.24E-23 |
| 3-234 | 3 | 98980750  | 99045061  | NONE | gap called | 98980750  | 99045061  | 16113  | 7.24E-23 | 28 | 25 | INS | 7.24E-23 |
| 3-239 | 3 | 99719187  | 99809005  | NONE | gap called | 99719187  | 99809005  | 12323  | 7.24E-23 | 53 | 40 | INS | 7.24E-23 |
| 3-241 | 3 | 101276520 | 101317707 | NONE | gap called | 101276520 | 101317707 | 5253   | 7.24E-23 | 52 | 39 | INS | 7.24E-23 |
| 3-244 | 3 | 101844059 | 101894953 | NONE | gap called | 101844059 | 101894953 | 6818   | 7.24E-23 | 48 | 42 | INS | 7.24E-23 |
| 3-246 | 3 | 102237718 | 102284885 | NONE | gap called | 102237718 | 102284885 | 5338   | 2.13E-21 | 54 | 45 | INS | 2.13E-21 |
| 3-250 | 3 | 103158815 | 103189218 | NONE | gap called | 103158815 | 103189218 | 17734  | 7.24E-23 | 49 | 35 | INS | 7.24E-23 |
| 3-260 | 3 | 106382492 | 106396907 | NONE | gap called | 106382492 | 106396907 | 13751  | 1.07E-22 | 55 | 39 | INS | 1.07E-22 |
| 3-266 | 3 | 111464146 | 111521869 | NONE | gap called | 111464146 | 111521869 | 4699   | 6.28E-10 | 61 | 36 | INS | 6.28E-10 |
| 3-269 | 3 | 112065637 | 112122091 | NONE | gap called | 112065637 | 112122091 | 6132   | 6.02E-19 | 52 | 41 | INS | 6.02E-19 |
| 3-272 | 3 | 112632391 | 112643648 | NONE | gap called | 112632391 | 112643648 | 10288  | 7.24E-23 | 60 | 48 | INS | 7.24E-23 |
| 3-275 | 3 | 113135292 | 113151478 | NONE | gap called | 113135292 | 113151478 | 8231   | 7.24E-23 | 63 | 52 | INS | 7.24E-23 |
| 3-287 | 3 | 121344439 | 121361862 | NONE | gap called | 121344439 | 121361862 | 6878   | 7.24E-23 | 78 | 61 | INS | 7.24E-23 |
| 3-291 | 3 | 124089262 | 124136174 | NONE | gap called | 124089262 | 124136174 | 8000   | 7.24E-23 | 57 | 51 | INS | 7.24E-23 |
| 3-297 | 3 | 126594314 | 126613759 | NONE | gap called | 126594314 | 126613759 | 14286  | 7.24E-23 | 78 | 45 | INS | 7.24E-23 |
| 3-299 | 3 | 126780351 | 126780351 | NONE | gap called | 126780351 | 126780351 | 69228  | 0.00E+00 | 54 | 0  | INS | 0.00E+00 |
| 3-302 | 3 | 131023468 | 131036639 | NONE | gap called | 131023468 | 131036639 | 8832   | 7.24E-23 | 57 | 45 | INS | 7.24E-23 |
| 3-304 | 3 | 131232446 | 131253383 | NONE | gap called | 131232446 | 131253383 | 5413   | 7.24E-23 | 66 | 49 | INS | 7.24E-23 |
| 3-305 | 3 | 131602719 | 131645650 | NONE | gap called | 131602719 | 131645650 | 5545   | 7.24E-23 | 65 | 46 | INS | 7.24E-23 |
| 3-308 | 3 | 132355106 | 132400410 | NONE | gap called | 132355106 | 132400410 | 12050  | 7.24E-23 | 58 | 46 | INS | 7.24E-23 |
| 3-312 | 3 | 135930694 | 135947161 | NONE | gap called | 135930694 | 135947161 | 7835   | 7.24E-23 | 66 | 50 | INS | 7.24E-23 |
| 3-314 | 3 | 136494649 | 136524388 | NONE | gap called | 136494649 | 136524388 | 6538   | 7.24E-23 | 75 | 50 | INS | 7.24E-23 |
| 3-315 | 3 | 136699017 | 136699017 | NONE | gap called | 136699017 | 136699017 | 45036  | 0.00E+00 | 68 | 0  | INS | 0.00E+00 |
| 3-320 | 3 | 137917652 | 137940180 | NONE | gap called | 137917652 | 137940180 | 8978   | 7.24E-23 | 50 | 37 | INS | 7.24E-23 |
| 3-322 | 3 | 138349325 | 138367451 | NONE | gap called | 138349325 | 138367451 | 6744   | 1.08E-22 | 37 | 33 | INS | 1.08E-22 |
| 3-323 | 3 | 138367451 | 138416501 | NONE | gap called | 138367451 | 138416501 | 5844   | 1.40E-15 | 35 | 29 | INS | 1.40E-15 |
| 3-343 | 3 | 143504876 | 143559525 | NONE | gap called | 143504876 | 143559525 | 9604   | 7.24E-23 | 75 | 60 | INS | 7.24E-23 |
| 3-352 | 3 | 147295041 | 147335031 | NONE | gap called | 147295041 | 147335031 | 7253   | 7.24E-23 | 49 | 42 | INS | 7.24E-23 |
| 3-355 | 3 | 148574704 | 148635871 | NONE | gap called | 148574704 | 148635871 | 12397  | 7.24E-23 | 34 | 33 | INS | 7.24E-23 |
| 3-356 | 3 | 148635871 | 148659576 | NONE | gap called | 148635871 | 148659576 | 6507   | 7.24E-23 | 37 | 29 | INS | 7.24E-23 |
| 3-360 | 3 | 150284649 | 150377866 | NONE | gap called | 150284649 | 150377866 | 28615  | 7.24E-23 | 52 | 40 | INS | 7.24E-23 |
| 3-363 | 3 | 152246604 | 152266655 | NONE | gap called | 152246604 | 152266655 | 7451   | 7.24E-23 | 42 | 30 | INS | 7.24E-23 |
| 3-368 | 3 | 157949796 | 157981274 | NONE | gap called | 157949796 | 157981274 | 9080   | 7.24E-23 | 39 | 35 | INS | 7.24E-23 |
| 3-372 | 3 | 160839862 | 160857870 | NONE | gap called | 160839862 | 160857870 | 8115   | 1.06E-22 | 46 | 37 | INS | 1.06E-22 |
| 3-377 | 3 | 161391486 | 161439091 | NONE | gap called | 161391486 | 161439091 | 6169   | 3.14E-15 | 29 | 24 | INS | 3.14E-15 |
| 3-391 | 3 | 168525522 | 168539242 | NONE | gap called | 168525522 | 168539242 | 8927   | 7.24E-23 | 63 | 45 | INS | 7.24E-23 |
| 3-396 | 3 | 172616049 | 172660261 | NONE | gap called | 172616049 | 172660261 | 8645   | 7.24E-23 | 49 | 36 | INS | 7.24E-23 |
| 3-401 | 3 | 174440057 | 174512496 | NONE | gap called | 174440057 | 174512496 | 8765   | 8.69E-18 | 40 | 30 | INS | 8.69E-18 |
| 3-403 | 3 | 175045593 | 175045593 | NONE | gap called | 175045593 | 175045593 | 153236 | 0.00E+00 | 21 | 0  | INS | 0.00E+00 |
| 3-404 | 3 | 175486972 | 175543920 | NONE | gap called | 175486972 | 175543920 | 5078   | 2.52E-09 | 32 | 29 | INS | 2.52E-09 |
| 3-405 | 3 | 175573930 | 175660118 | NONE | gap called | 175573930 | 175660118 | 10288  | 8.69E-18 | 39 | 30 | INS | 8.69E-18 |
| 3-416 | 3 | 183037008 | 183037008 | NONE | gap called | 183037008 | 183037008 | 7457   | 0.00E+00 | 62 | 0  | INS | 0.00E+00 |
| 3-418 | 3 | 183482549 | 183497881 | NONE | gap called | 183482549 | 183497881 | 5090   | 7.24E-23 | 65 | 47 | INS | 7.24E-23 |
| 3-436 | 3 | 187328752 | 187362615 | NONE | gap called | 187328752 | 187362615 | 12081  | 7.24E-23 | 72 | 58 | INS | 7.24E-23 |
| 3-438 | 3 | 187578665 | 187597144 | NONE | gap called | 187578665 | 187597144 | 6563   | 7.24E-23 | 78 | 71 | INS | 7.24E-23 |
| 3-439 | 3 | 187667229 | 187723469 | NONE | gap called | 187667229 | 187723469 | 7925   | 7.24E-23 | 67 | 62 | INS | 7.24E-23 |
| 3-443 | 3 | 188987334 | 188987334 | NONE | gap called | 188987334 | 188987334 | 7654   | 2.66E-22 | 65 | 55 | INS | 2.66E-22 |
| 3-445 | 3 | 189221524 | 189221524 | NONE | gap called | 189221524 | 189221524 | 11586  | 0.00E+00 | 84 | 0  | INS | 0.00E+00 |
| 3-448 | 3 | 189587118 | 189642904 | NONE | gap called | 189587118 | 189642904 | 9899   | 7.24E-23 | 43 | 36 | INS | 7.24E-23 |
| 3-449 | 3 | 189774710 | 189781123 | NONE | gap called | 189774710 | 189781123 | 5799   | 7.24E-23 | 35 | 25 | INS | 7.24E-23 |
| 3-454 | 3 | 195839207 | 195839207 | NONE | gap called | 195839207 | 195839207 | 9932   | 0.00E+00 | 80 | 0  | INS | 0.00E+00 |
| 3-456 | 3 | 196194562 | 196257923 | NONE | gap called | 196194562 | 196257923 | 11608  | 7.24E-23 | 23 | 19 | INS | 7.24E-23 |
| 3-460 | 3 | 200703948 | 200783132 | NONE | gap called | 200703948 | 200783132 | 52410  | 1.07E-22 | 55 | 43 | INS | 1.07E-22 |
| 3-466 | 3 | 202119954 | 202193306 | NONE | gap called | 202119954 | 202193306 | 12547  | 7.24E-23 | 66 | 53 | INS | 7.24E-23 |
| 3-472 | 3 | 203366200 | 203366200 | NONE | gap called | 203366200 | 203366200 | 8733   | 0.00E+00 | 72 | 0  | INS | 0.00E+00 |
| 3-473 | 3 | 203419790 | 203419790 | NONE | gap called | 203419790 | 203419790 | 113715 | 0.00E+00 | 53 | 0  | INS | 0.00E+00 |
| 3-495 | 3 | 210176557 | 210196815 | NONE | gap called | 210176557 | 210196815 | 6489   | 7.24E-23 | 81 | 61 | INS | 7.24E-23 |
| 3-503 | 3 | 212826287 | 212836847 | NONE | gap called | 212826287 | 212836847 | 6609   | 7.24E-23 | 82 | 65 | INS | 7.24E-23 |
| 3-510 | 3 | 214745618 | 214767213 | NONE | gap called | 214745618 | 214767213 | 7594   | 7.24E-23 | 74 | 59 | INS | 7.24E-23 |
| 3-511 | 3 | 214894101 | 214894101 | NONE | gap called | 214894101 | 214894101 | 7402   | 0.00E+00 | 74 | 0  | INS | 0.00E+00 |
| 3-514 | 3 | 215513986 | 215564616 | NONE | gap called | 215513986 | 215564616 | 30726  | 1.08E-22 | 69 | 58 | INS | 1.08E-22 |
| 3-518 | 3 | 216133772 | 216192635 | NONE | gap called | 216133772 | 216192635 | 7384   | 7.24E-23 | 56 | 44 | INS | 7.24E-23 |
| 3-521 | 3 | 216943572 | 216968874 | NONE | gap called | 216943572 | 216968874 | 12333  | 7.24E-23 |    |    |     |          |

|       |   |           |           |      |            |           |           |        |          |    |    |     |          |
|-------|---|-----------|-----------|------|------------|-----------|-----------|--------|----------|----|----|-----|----------|
| 3-545 | 3 | 226799293 | 226829154 | NONE | gap called | 226799293 | 226829154 | 5944   | 7.24E-23 | 56 | 45 | INS | 7.24E-23 |
| 3-555 | 3 | 229521776 | 229548428 | NONE | gap called | 229521776 | 229548428 | 9265   | 7.24E-23 | 87 | 62 | INS | 7.24E-23 |
| 4-3   | 4 | 5469760   | 5469760   | NONE | gap called | 5469760   | 5469760   | 8821   | 0.00E+00 | 59 | 0  | INS | 0.00E+00 |
| 4-6   | 4 | 5742463   | 5742463   | NONE | gap called | 5742463   | 5742463   | 6097   | 0.00E+00 | 66 | 0  | INS | 0.00E+00 |
| 4-9   | 4 | 6451480   | 6494330   | NONE | gap called | 6451480   | 6494330   | 6615   | 7.57E-23 | 76 | 65 | INS | 7.57E-23 |
| 4-20  | 4 | 8100248   | 8132979   | NONE | gap called | 8100248   | 8132979   | 6096   | 7.57E-23 | 32 | 30 | INS | 7.57E-23 |
| 4-24  | 4 | 9287549   | 9314708   | NONE | gap called | 9287549   | 9314708   | 9122   | 7.57E-23 | 46 | 37 | INS | 7.57E-23 |
| 4-26  | 4 | 9774999   | 9774999   | NONE | gap called | 9774999   | 9774999   | 56274  | 0.00E+00 | 63 | 0  | INS | 0.00E+00 |
| 4-30  | 4 | 11195836  | 11296556  | NONE | gap called | 11195836  | 11296556  | 43808  | 1.11E-22 | 50 | 35 | INS | 1.11E-22 |
| 4-37  | 4 | 13742517  | 13782924  | NONE | gap called | 13742517  | 13782924  | 6340   | 7.57E-23 | 63 | 54 | INS | 7.57E-23 |
| 4-46  | 4 | 18414669  | 18414669  | NONE | gap called | 18414669  | 18414669  | 106226 | 0.00E+00 | 53 | 0  | INS | 0.00E+00 |
| 4-49  | 4 | 19017719  | 19056523  | NONE | gap called | 19017719  | 19056523  | 5144   | 7.57E-23 | 92 | 67 | INS | 7.57E-23 |
| 4-63  | 4 | 29708855  | 29770137  | NONE | gap called | 29708855  | 29770137  | 8009   | 3.88E-18 | 36 | 26 | INS | 3.88E-18 |
| 4-75  | 4 | 36791932  | 36843005  | NONE | gap called | 36791932  | 36843005  | 12770  | 7.57E-23 | 40 | 33 | INS | 7.57E-23 |
| 4-78  | 4 | 37390895  | 37483663  | NONE | gap called | 37390895  | 37483663  | 13722  | 7.57E-23 | 49 | 38 | INS | 7.57E-23 |
| 4-82  | 4 | 38186735  | 38343015  | NONE | gap called | 38186735  | 38343015  | 22563  | 1.02E-19 | 21 | 21 | INS | 1.02E-19 |
| 4-84  | 4 | 38669300  | 38703039  | NONE | gap called | 38669300  | 38703039  | 6488   | 7.57E-23 | 63 | 42 | INS | 7.57E-23 |
| 4-96  | 4 | 42474200  | 42518418  | NONE | gap called | 42474200  | 42518418  | 8342   | 7.57E-23 | 82 | 56 | INS | 7.57E-23 |
| 4-101 | 4 | 43450974  | 43450974  | NONE | gap called | 43450974  | 43450974  | 20098  | 0.00E+00 | 59 | 0  | INS | 0.00E+00 |
| 4-104 | 4 | 43931487  | 43963435  | NONE | gap called | 43931487  | 43963435  | 5030   | 7.57E-23 | 57 | 47 | INS | 7.57E-23 |
| 4-107 | 4 | 47921720  | 47948478  | NONE | gap called | 47921720  | 47948478  | 8019   | 7.57E-23 | 27 | 25 | INS | 7.57E-23 |
| 4-112 | 4 | 49180471  | 49236544  | NONE | gap called | 49180471  | 49236544  | 15563  | 7.57E-23 | 31 | 26 | INS | 7.57E-23 |
| 4-116 | 4 | 51222666  | 51222666  | NONE | gap called | 51222666  | 51222666  | 10880  | 0.00E+00 | 58 | 0  | INS | 0.00E+00 |
| 4-119 | 4 | 52328607  | 52328607  | NONE | gap called | 52328607  | 52328607  | 28757  | 0.00E+00 | 48 | 0  | INS | 0.00E+00 |
| 4-122 | 4 | 53110459  | 53154171  | NONE | gap called | 53110459  | 53154171  | 12477  | 7.57E-23 | 36 | 27 | INS | 7.57E-23 |
| 4-134 | 4 | 60511935  | 60535501  | NONE | gap called | 60511935  | 60535501  | 7877   | 7.57E-23 | 49 | 40 | INS | 7.57E-23 |
| 4-140 | 4 | 62163502  | 62163502  | NONE | gap called | 62163502  | 62163502  | 47033  | 0.00E+00 | 48 | 0  | INS | 0.00E+00 |
| 4-142 | 4 | 62747165  | 62846508  | NONE | gap called | 62747165  | 62846508  | 23793  | 1.11E-22 | 40 | 36 | INS | 1.11E-22 |
| 4-147 | 4 | 64207786  | 64272729  | NONE | gap called | 64207786  | 64272729  | 8776   | 7.57E-23 | 46 | 41 | INS | 7.57E-23 |
| 4-150 | 4 | 66364486  | 66383772  | NONE | gap called | 66364486  | 66383772  | 5666   | 7.57E-23 | 55 | 43 | INS | 7.57E-23 |
| 4-151 | 4 | 66433555  | 66451641  | NONE | gap called | 66433555  | 66451641  | 5244   | 7.57E-23 | 66 | 47 | INS | 7.57E-23 |
| 4-154 | 4 | 68282165  | 68346842  | NONE | gap called | 68282165  | 68346842  | 6748   | 3.65E-14 | 39 | 31 | INS | 3.65E-14 |
| 4-157 | 4 | 69162616  | 69162616  | NONE | gap called | 69162616  | 69162616  | 12663  | 0.00E+00 | 74 | 0  | INS | 0.00E+00 |
| 4-169 | 4 | 72104583  | 72143652  | NONE | gap called | 72104583  | 72143652  | 8563   | 7.57E-23 | 66 | 47 | INS | 7.57E-23 |
| 4-174 | 4 | 73432083  | 73482043  | NONE | gap called | 73432083  | 73482043  | 5704   | 7.57E-23 | 58 | 48 | INS | 7.57E-23 |
| 4-176 | 4 | 74162686  | 74205268  | NONE | gap called | 74162686  | 74205268  | 14009  | 1.10E-22 | 80 | 56 | INS | 1.10E-22 |
| 4-177 | 4 | 74962898  | 75022501  | NONE | gap called | 74962898  | 75022501  | 59528  | 1.10E-22 | 51 | 39 | INS | 1.10E-22 |
| 4-179 | 4 | 76278032  | 76324839  | NONE | gap called | 76278032  | 76324839  | 7599   | 7.57E-23 | 37 | 36 | INS | 7.57E-23 |
| 4-190 | 4 | 80486434  | 80603015  | NONE | gap called | 80486434  | 80603015  | 12583  | 1.05E-10 | 27 | 20 | INS | 1.05E-10 |
| 4-192 | 4 | 80798297  | 80830597  | NONE | gap called | 80798297  | 80830597  | 11979  | 7.57E-23 | 54 | 46 | INS | 7.57E-23 |
| 4-193 | 4 | 81131878  | 81131878  | NONE | gap called | 81131878  | 81131878  | 28131  | 0.00E+00 | 64 | 0  | INS | 0.00E+00 |
| 4-197 | 4 | 82085772  | 82098954  | NONE | gap called | 82085772  | 82098954  | 11507  | 1.11E-22 | 57 | 45 | INS | 1.11E-22 |
| 4-201 | 4 | 82875810  | 82888887  | NONE | gap called | 82875810  | 82888887  | 6256   | 7.57E-23 | 48 | 34 | INS | 7.57E-23 |
| 4-202 | 4 | 82975191  | 83135532  | NONE | gap called | 82975191  | 83135532  | 53048  | 1.09E-22 | 28 | 23 | INS | 1.09E-22 |
| 4-206 | 4 | 84440919  | 84454699  | NONE | gap called | 84440919  | 84454699  | 6976   | 7.57E-23 | 61 | 53 | INS | 7.57E-23 |
| 4-207 | 4 | 84517360  | 84555473  | NONE | gap called | 84517360  | 84555473  | 11028  | 7.57E-23 | 42 | 37 | INS | 7.57E-23 |
| 4-213 | 4 | 86095163  | 86121473  | NONE | gap called | 86095163  | 86121473  | 6328   | 7.57E-23 | 60 | 51 | INS | 7.57E-23 |
| 4-222 | 4 | 88023184  | 88050539  | NONE | gap called | 88023184  | 88050539  | 5421   | 7.57E-23 | 62 | 50 | INS | 7.57E-23 |
| 4-223 | 4 | 88095636  | 88109457  | NONE | gap called | 88095636  | 88109457  | 5262   | 7.57E-23 | 66 | 29 | INS | 7.57E-23 |
| 4-224 | 4 | 88269671  | 88269671  | NONE | gap called | 88269671  | 88269671  | 118943 | 0.00E+00 | 52 | 0  | INS | 0.00E+00 |
| 4-234 | 4 | 91542121  | 91542670  | NONE | gap called | 91542121  | 91542670  | 7953   | 7.57E-23 | 67 | 55 | INS | 7.57E-23 |
| 4-236 | 4 | 91966296  | 91992971  | NONE | gap called | 91966296  | 91992971  | 12078  | 7.57E-23 | 41 | 34 | INS | 7.57E-23 |
| 4-237 | 4 | 92219452  | 92267418  | NONE | gap called | 92219452  | 92267418  | 5196   | 1.69E-13 | 35 | 29 | INS | 1.69E-13 |
| 4-244 | 4 | 94396008  | 94468306  | NONE | gap called | 94396008  | 94468306  | 9681   | 8.17E-22 | 47 | 29 | INS | 8.17E-22 |
| 4-250 | 4 | 95985976  | 96015907  | NONE | gap called | 95985976  | 96015907  | 8368   | 7.57E-23 | 30 | 25 | INS | 7.57E-23 |
| 4-251 | 4 | 96083087  | 96105433  | NONE | gap called | 96083087  | 96105433  | 9772   | 7.57E-23 | 35 | 29 | INS | 7.57E-23 |
| 4-255 | 4 | 97642117  | 97653351  | NONE | gap called | 97642117  | 97653351  | 7765   | 7.57E-23 | 59 | 50 | INS | 7.57E-23 |
| 4-259 | 4 | 99254381  | 99285858  | NONE | gap called | 99254381  | 99285858  | 11279  | 7.57E-23 | 62 | 50 | INS | 7.57E-23 |
| 4-260 | 4 | 99861607  | 99888616  | NONE | gap called | 99861607  | 99888616  | 9193   | 7.57E-23 | 50 | 45 | INS | 7.57E-23 |
| 4-267 | 4 | 101210711 | 101210711 | NONE | gap called | 101210711 | 101210711 | 7771   | 0.00E+00 | 53 | 0  | INS | 0.00E+00 |
| 4-272 | 4 | 10282941  | 102879014 | NONE | gap called | 10282941  | 102879014 | 8191   | 7.57E-23 | 64 | 57 | INS | 7.57E-23 |
| 4-275 | 4 | 105851607 | 105904655 | NONE | gap called | 105851607 | 105904655 | 17009  | 7.57E-23 | 57 | 50 | INS | 7.57E-23 |
| 4-276 | 4 | 106850677 | 106850677 | NONE | gap called | 106850677 | 106850677 | 11277  | 0.00E+00 | 69 | 0  | INS | 0.00E+00 |
| 4-277 | 4 | 106885138 | 106903673 | NONE | gap called | 106885138 | 106903673 | 7642   | 7.57E-23 | 81 | 66 | INS | 7.57E-23 |
| 4-282 | 4 | 109743562 | 109743562 | NONE | gap called | 109743562 | 109743562 | 11361  | 0.00E+00 | 57 | 0  | INS | 0.00E+00 |
| 4-293 | 4 | 113903009 | 113964215 | NONE | gap called | 113903009 | 113964215 | 7666   | 5.93E-21 | 39 | 33 | INS | 5.93E-21 |
| 4-296 | 4 | 114431330 | 114486258 | NONE | gap called | 114431330 | 114486258 | 6713   | 7.57E-23 | 68 | 53 | INS | 7.57E-23 |
| 4-298 | 4 | 115532373 | 115558493 | NONE | gap called | 115532373 | 115558493 | 7954   | 7.57E-23 | 59 | 41 | INS | 7.57E-23 |
| 4-299 | 4 | 115934477 | 116003440 | NONE | gap called | 115934477 | 116003440 | 8880   | 7.57E-23 | 43 | 37 | INS | 7.57E-23 |
| 4-314 | 4 | 121178139 | 121234597 | NONE | gap called | 121178139 | 121234597 | 6288   | 6.40E-19 | 42 | 38 | INS | 6.40E-19 |
| 4-319 | 4 | 122862395 | 122893984 | NONE | gap called | 122862395 | 122893984 | 6591   | 7.57E-23 | 51 | 36 | INS | 7.57E-23 |
| 4-323 | 4 | 123960619 | 123960619 | NONE | gap called | 123960619 | 123960619 | 8057   | 0.00E+00 | 70 | 0  | INS | 0.00E+00 |
| 4-325 | 4 | 125363518 | 125405759 | NONE | gap called | 125363518 | 125405759 | 7873   | 7.57E-23 | 64 | 43 | INS | 7.57E-23 |
| 4-327 | 4 | 132050041 | 132084033 | NONE | gap called | 132050041 | 132084033 | 5233   | 7.57E-23 | 67 | 59 | INS | 7.57E-23 |
| 4-337 | 4 | 136343118 | 136380305 | NONE | gap called | 136343118 | 136380305 | 8359   | 7.57E-23 | 94 | 73 | INS | 7.57E-23 |
| 4-340 | 4 | 137185533 | 137185533 | NONE | gap called | 137185533 | 137185533 | 10330  | 0.00E+00 | 56 | 0  | INS | 0.00E+00 |
| 4-343 | 4 | 138069213 | 138079614 | NONE | gap called | 138069213 | 138079614 | 6775   | 7.57E-23 | 42 | 35 | INS | 7.57E-23 |
| 4-344 | 4 | 138287003 | 138303110 | NONE | gap called | 138287003 | 138303110 | 5095   | 7.57E-23 | 46 | 34 | INS | 7.57E-23 |
| 4-348 | 4 | 140089997 | 140153703 | NONE | gap called | 140089997 | 140153703 | 6673   | 2.25E-17 | 49 | 38 | INS | 2.25E-17 |
| 4-349 | 4 | 14034920  | 140343345 | NONE | gap called | 14034920  | 140343345 | 14419  | 7.57E-23 | 54 | 45 | INS | 7.57E-23 |
| 4-354 | 4 | 142016079 | 142051469 | NONE | gap called | 142016079 | 142051469 | 5021   | 7.57E-23 | 67 | 49 | INS | 7.57E-23 |
| 4-356 | 4 | 142175938 | 142199924 | NONE | gap called | 142175938 | 142199924 | 5100   | 7.57E-23 | 71 | 58 | INS | 7.57E-23 |
| 4-372 | 4 | 149455399 | 149512122 | NONE | gap called | 149455399 | 149512122 | 15370  | 7.57E-23 | 65 | 43 | INS | 7.57E-23 |
| 4-375 | 4 | 152827081 | 152849116 | NONE | gap called | 152827081 | 152849116 | 8596   | 7.57E-23 | 79 | 51 | INS | 7.57E-23 |
| 4-386 | 4 | 156716299 | 156716299 | NONE | gap called | 156716299 | 156716299 | 43838  | 0.00E+00 | 81 | 0  | INS | 0.00E+00 |
| 4-388 | 4 | 156891632 | 156949787 | NONE | gap called | 156891632 | 156949787 | 22808  | 1.07E-22 | 62 | 47 | INS | 1.07E-22 |
| 4-396 | 4 | 158772110 | 158783754 | NONE | gap called | 158772110 | 158783754 | 21871  | 7.57E-23 | 63 | 51 | INS | 7        |

|       |   |           |           |      |            |           |           |       |          |    |    |     |          |
|-------|---|-----------|-----------|------|------------|-----------|-----------|-------|----------|----|----|-----|----------|
| 4-439 | 4 | 168258778 | 168258778 | NONE | gap called | 168258778 | 168258778 | 27728 | 0.00E+00 | 57 | 0  | INS | 0.00E+00 |
| 4-449 | 4 | 170591993 | 170605250 | NONE | gap called | 170591993 | 170605250 | 7098  | 7.57E-23 | 98 | 75 | INS | 7.57E-23 |
| 4-450 | 4 | 170731563 | 170745661 | NONE | gap called | 170731563 | 170745661 | 6848  | 7.57E-23 | 87 | 67 | INS | 7.57E-23 |
| 4-460 | 4 | 174603982 | 174682372 | NONE | gap called | 174603982 | 174682372 | 9499  | 7.57E-23 | 88 | 69 | INS | 7.57E-23 |
| 4-461 | 4 | 174886236 | 174898588 | NONE | gap called | 174886236 | 174898588 | 6495  | 7.57E-23 | 90 | 68 | INS | 7.57E-23 |
| 4-484 | 4 | 187009946 | 187037564 | NONE | gap called | 187009946 | 187037564 | 8461  | 7.57E-23 | 58 | 45 | INS | 7.57E-23 |
| 4-489 | 4 | 189845891 | 189867684 | NONE | gap called | 189845891 | 189867684 | 11049 | 7.57E-23 | 93 | 76 | INS | 7.57E-23 |
| 4-495 | 4 | 191724410 | 191877509 | NONE | gap called | 191724410 | 191877509 | 34189 | 7.57E-23 | 23 | 14 | INS | 7.57E-23 |
| 4-506 | 4 | 198415611 | 198427903 | NONE | gap called | 198415611 | 198427903 | 9707  | 7.57E-23 | 86 | 64 | INS | 7.57E-23 |
| 4-516 | 4 | 201695741 | 201708808 | NONE | gap called | 201695741 | 201708808 | 11695 | 7.57E-23 | 73 | 62 | INS | 7.57E-23 |
| 4-534 | 4 | 205577848 | 205577848 | NONE | gap called | 205577848 | 205577848 | 26367 | 0.00E+00 | 65 | 0  | INS | 0.00E+00 |
| 4-537 | 4 | 205926049 | 205926049 | NONE | gap called | 205926049 | 205926049 | 68740 | 0.00E+00 | 48 | 0  | INS | 0.00E+00 |
| 4-538 | 4 | 206073965 | 206073965 | NONE | gap called | 206073965 | 206073965 | 8081  | 0.00E+00 | 56 | 0  | INS | 0.00E+00 |
| 4-544 | 4 | 207801091 | 207817100 | NONE | gap called | 207801091 | 207817100 | 8923  | 7.57E-23 | 76 | 54 | INS | 7.57E-23 |
| 4-545 | 4 | 208070196 | 208087960 | NONE | gap called | 208070196 | 208087960 | 11278 | 7.57E-23 | 61 | 39 | INS | 7.57E-23 |
| 4-548 | 4 | 208954072 | 208990691 | NONE | gap called | 208954072 | 208990691 | 7655  | 7.57E-23 | 81 | 53 | INS | 7.57E-23 |
| 4-562 | 4 | 213274392 | 213335299 | NONE | gap called | 213274392 | 213335299 | 34796 | 7.57E-23 | 36 | 32 | INS | 7.57E-23 |
| 4-568 | 4 | 215099875 | 215156611 | NONE | gap called | 215099875 | 215156611 | 9690  | 7.57E-23 | 49 | 37 | INS | 7.57E-23 |
| 4-570 | 4 | 215552729 | 215582615 | NONE | gap called | 215552729 | 215582615 | 6606  | 7.57E-23 | 58 | 44 | INS | 7.57E-23 |
| 4-574 | 4 | 216624752 | 216648468 | NONE | gap called | 216624752 | 216648468 | 8405  | 7.57E-23 | 54 | 34 | INS | 7.57E-23 |
| 4-579 | 4 | 218434701 | 218434701 | NONE | gap called | 218434701 | 218434701 | 51445 | 0.00E+00 | 41 | 0  | INS | 0.00E+00 |
| 4-585 | 4 | 220743653 | 220768845 | NONE | gap called | 220743653 | 220768845 | 6055  | 7.57E-23 | 58 | 47 | INS | 7.57E-23 |
| 4-586 | 4 | 221380225 | 221380225 | NONE | gap called | 221380225 | 221380225 | 36811 | 0.00E+00 | 58 | 0  | INS | 0.00E+00 |
| 4-589 | 4 | 221941977 | 221965917 | NONE | gap called | 221941977 | 221965917 | 6540  | 7.57E-23 | 55 | 42 | INS | 7.57E-23 |
| 4-590 | 4 | 222182503 | 222182503 | NONE | gap called | 222182503 | 222182503 | 5464  | 7.57E-23 | 49 | 42 | INS | 7.57E-23 |
| 4-593 | 4 | 222792546 | 222792546 | NONE | gap called | 222792546 | 222792546 | 7155  | 7.57E-23 | 75 | 69 | INS | 7.57E-23 |
| 4-594 | 4 | 222792546 | 222811534 | NONE | gap called | 222792546 | 222811534 | 5545  | 7.57E-23 | 73 | 60 | INS | 7.57E-23 |
| 4-596 | 4 | 223312881 | 223361719 | NONE | gap called | 223312881 | 223361719 | 13964 | 7.57E-23 | 62 | 53 | INS | 7.57E-23 |
| 4-602 | 4 | 223853580 | 223888585 | NONE | gap called | 223853580 | 223888585 | 7516  | 7.57E-23 | 45 | 36 | INS | 7.57E-23 |
| 4-605 | 4 | 224668354 | 224722088 | NONE | gap called | 224668354 | 224722088 | 5460  | 7.61E-15 | 41 | 36 | INS | 7.61E-15 |
| 4-609 | 4 | 225188115 | 225188115 | NONE | gap called | 225188115 | 225188115 | 7318  | 0.00E+00 | 62 | 0  | INS | 0.00E+00 |
| 4-612 | 4 | 225503248 | 225527553 | NONE | gap called | 225503248 | 225527553 | 12668 | 7.57E-23 | 42 | 35 | INS | 7.57E-23 |
| 4-617 | 4 | 226414862 | 226414862 | NONE | gap called | 226414862 | 226414862 | 12277 | 0.00E+00 | 81 | 0  | INS | 0.00E+00 |
| 4-619 | 4 | 226580250 | 226626901 | NONE | gap called | 226580250 | 226626901 | 6424  | 7.57E-23 | 71 | 50 | INS | 7.57E-23 |
| 4-621 | 4 | 226778383 | 226778383 | NONE | gap called | 226778383 | 226778383 | 12564 | 0.00E+00 | 84 | 0  | INS | 0.00E+00 |
| 4-625 | 4 | 227774399 | 227799763 | NONE | gap called | 227774399 | 227799763 | 8326  | 7.57E-23 | 49 | 34 | INS | 7.57E-23 |
| 4-628 | 4 | 231061322 | 231097161 | NONE | gap called | 231061322 | 231097161 | 15123 | 7.57E-23 | 42 | 33 | INS | 7.57E-23 |
| 4-635 | 4 | 232861335 | 232861335 | NONE | gap called | 232861335 | 232861335 | 6580  | 7.57E-23 | 61 | 40 | INS | 7.57E-23 |
| 4-636 | 4 | 232889788 | 232889788 | NONE | gap called | 232889788 | 232889788 | 86205 | 0.00E+00 | 59 | 0  | INS | 0.00E+00 |
| 4-641 | 4 | 233955355 | 233955355 | NONE | gap called | 233955355 | 233955355 | 7644  | 0.00E+00 | 86 | 0  | INS | 0.00E+00 |
| 4-649 | 4 | 235578687 | 235605616 | NONE | gap called | 235578687 | 235605616 | 6906  | 7.57E-23 | 76 | 52 | INS | 7.57E-23 |
| 4-652 | 4 | 236512282 | 236594847 | NONE | gap called | 236512282 | 236594847 | 45509 | 1.10E-22 | 30 | 25 | INS | 1.10E-22 |
| 4-661 | 4 | 242193142 | 242265071 | NONE | gap called | 242193142 | 242265071 | 7230  | 2.25E-17 | 46 | 41 | INS | 2.25E-17 |
| 4-667 | 4 | 243857084 | 243873630 | NONE | gap called | 243857084 | 243873630 | 7806  | 7.57E-23 | 91 | 69 | INS | 7.57E-23 |
| 4-668 | 4 | 244075845 | 244075845 | NONE | gap called | 244075845 | 244075845 | 78410 | 0.00E+00 | 69 | 0  | INS | 0.00E+00 |
| 4-673 | 4 | 245081160 | 245081160 | NONE | gap called | 245081160 | 245081160 | 7810  | 0.00E+00 | 68 | 0  | INS | 0.00E+00 |
| 4-674 | 4 | 245422542 | 245458568 | NONE | gap called | 245422542 | 245458568 | 10447 | 7.57E-23 | 40 | 35 | INS | 7.57E-23 |
| 4-675 | 4 | 245531149 | 245542859 | NONE | gap called | 245531149 | 245542859 | 5160  | 7.57E-23 | 51 | 43 | INS | 7.57E-23 |
| 5-8   | 5 | 2148852   | 2177048   | NONE | gap called | 2148852   | 2177048   | 6756  | 7.30E-23 | 45 | 37 | INS | 7.30E-23 |
| 5-20  | 5 | 4740102   | 4769040   | NONE | gap called | 4740102   | 4769040   | 7359  | 7.30E-23 | 79 | 61 | INS | 7.30E-23 |
| 5-21  | 5 | 4927210   | 4989527   | NONE | gap called | 4927210   | 4989527   | 12643 | 7.30E-23 | 59 | 43 | INS | 7.30E-23 |
| 5-24  | 5 | 5462102   | 5462102   | NONE | gap called | 5462102   | 5462102   | 53341 | 0.00E+00 | 66 | 0  | INS | 0.00E+00 |
| 5-27  | 5 | 6204127   | 6266682   | NONE | gap called | 6204127   | 6266682   | 9149  | 7.30E-23 | 53 | 43 | INS | 7.30E-23 |
| 5-49  | 5 | 16675564  | 16734605  | NONE | gap called | 16675564  | 16734605  | 11346 | 7.30E-23 | 27 | 25 | INS | 7.30E-23 |
| 5-56  | 5 | 23290213  | 23299484  | NONE | gap called | 23290213  | 23299484  | 7300  | 7.30E-23 | 79 | 55 | INS | 7.30E-23 |
| 5-69  | 5 | 32476299  | 32509126  | NONE | gap called | 32476299  | 32509126  | 6052  | 7.30E-23 | 89 | 69 | INS | 7.30E-23 |
| 5-72  | 5 | 33664975  | 33685768  | NONE | gap called | 33664975  | 33685768  | 5355  | 7.30E-23 | 45 | 36 | INS | 7.30E-23 |
| 5-75  | 5 | 34223288  | 34223288  | NONE | gap called | 34223288  | 34223288  | 19932 | 0.00E+00 | 73 | 0  | INS | 0.00E+00 |
| 5-89  | 5 | 38489898  | 38531067  | NONE | gap called | 38489898  | 38531067  | 5987  | 7.30E-23 | 79 | 57 | INS | 7.30E-23 |
| 5-100 | 5 | 42123864  | 42140810  | NONE | gap called | 42123864  | 42140810  | 8440  | 7.30E-23 | 60 | 49 | INS | 7.30E-23 |
| 5-104 | 5 | 43839405  | 43890647  | NONE | gap called | 43839405  | 43890647  | 5997  | 7.30E-23 | 68 | 43 | INS | 7.30E-23 |
| 5-108 | 5 | 45694265  | 45717429  | NONE | gap called | 45694265  | 45717429  | 15872 | 1.02E-22 | 49 | 34 | INS | 1.02E-22 |
| 5-121 | 5 | 51286521  | 51381565  | NONE | gap called | 51286521  | 51381565  | 17466 | 7.30E-23 | 29 | 25 | INS | 7.30E-23 |
| 5-138 | 5 | 56237489  | 56271687  | NONE | gap called | 56237489  | 56271687  | 6454  | 7.30E-23 | 62 | 48 | INS | 7.30E-23 |
| 5-141 | 5 | 56698555  | 56698555  | NONE | gap called | 56698555  | 56698555  | 5609  | 0.00E+00 | 54 | 0  | INS | 0.00E+00 |
| 5-147 | 5 | 57422669  | 57486290  | NONE | gap called | 57422669  | 57486290  | 6518  | 7.30E-23 | 70 | 59 | INS | 7.30E-23 |
| 5-167 | 5 | 69366747  | 69403119  | NONE | gap called | 69366747  | 69403119  | 6804  | 7.30E-23 | 62 | 48 | INS | 7.30E-23 |
| 5-179 | 5 | 72471605  | 72471605  | NONE | gap called | 72471605  | 72471605  | 9584  | 0.00E+00 | 47 | 0  | INS | 0.00E+00 |
| 5-180 | 5 | 72696482  | 72720923  | NONE | gap called | 72696482  | 72720923  | 6954  | 7.30E-23 | 38 | 38 | INS | 7.30E-23 |
| 5-186 | 5 | 74174133  | 74195387  | NONE | gap called | 74174133  | 74195387  | 5999  | 7.30E-23 | 79 | 55 | INS | 7.30E-23 |
| 5-187 | 5 | 74274297  | 74316834  | NONE | gap called | 74274297  | 74316834  | 9776  | 7.30E-23 | 75 | 51 | INS | 7.30E-23 |
| 5-188 | 5 | 74517778  | 74530528  | NONE | gap called | 74517778  | 74530528  | 8041  | 7.30E-23 | 72 | 41 | INS | 7.30E-23 |
| 5-193 | 5 | 75760377  | 75813677  | NONE | gap called | 75760377  | 75813677  | 7149  | 7.30E-23 | 53 | 42 | INS | 7.30E-23 |
| 5-212 | 5 | 84211915  | 84224591  | NONE | gap called | 84211915  | 84224591  | 7698  | 7.30E-23 | 97 | 73 | INS | 7.30E-23 |
| 5-215 | 5 | 84790869  | 84819623  | NONE | gap called | 84790869  | 84819623  | 10295 | 7.30E-23 | 50 | 43 | INS | 7.30E-23 |
| 5-241 | 5 | 91986776  | 91986776  | NONE | gap called | 91986776  | 91986776  | 5356  | 0.00E+00 | 61 | 0  | INS | 0.00E+00 |
| 5-257 | 5 | 97943126  | 97981873  | NONE | gap called | 97943126  | 97981873  | 7771  | 7.30E-23 | 69 | 53 | INS | 7.30E-23 |
| 5-265 | 5 | 99860366  | 99885885  | NONE | gap called | 99860366  | 99885885  | 6490  | 7.30E-23 | 51 | 40 | INS | 7.30E-23 |
| 5-270 | 5 | 104409261 | 104456411 | NONE | gap called | 104409261 | 104456411 | 5189  | 1.21E-16 | 39 | 34 | INS | 1.21E-16 |
| 5-271 | 5 | 104600538 | 104600538 | NONE | gap called | 104600538 | 104600538 | 9830  | 7.30E-23 | 29 | 28 | INS | 7.30E-23 |
| 5-272 | 5 | 105715701 | 105736247 | NONE | gap called | 105715701 | 105736247 | 5425  | 7.30E-23 | 15 | 11 | INS | 7.30E-23 |
| 5-283 | 5 | 108880072 | 108920816 | NONE | gap called | 108880072 | 108920816 | 3890  | 2.04E-14 | 57 | 41 | INS | 2.04E-14 |
| 5-290 | 5 | 110572337 | 110572337 | NONE | gap called | 110572337 | 110572337 | 11183 | 0.00E+00 | 70 | 0  | INS | 0.00E+00 |
| 5-295 | 5 | 113359248 | 113426974 | NONE | gap called | 113359248 | 113426974 | 4781  | 2.81E-07 | 35 | 32 | INS | 2.81E-07 |
| 5-303 | 5 | 118306554 | 118362316 | NONE | gap called | 118306554 | 118362316 | 5978  | 2.15E-21 | 54 | 46 | INS | 2.15E-21 |
| 5-313 | 5 | 121329069 | 121329069 | NONE | gap called | 121329069 | 121329069 | 26207 | 0.00E+00 | 49 | 0  | INS | 0.00E+00 |
| 5-320 | 5 |           |           |      |            |           |           |       |          |    |    |     |          |

|       |   |           |           |      |            |           |           |       |          |    |    |     |          |
|-------|---|-----------|-----------|------|------------|-----------|-----------|-------|----------|----|----|-----|----------|
| 5-359 | 5 | 135697964 | 135697964 | NONE | gap called | 135697964 | 135697964 | 9696  | 0.00E+00 | 79 | 0  | INS | 0.00E+00 |
| 5-360 | 5 | 135792596 | 135879043 | NONE | gap called | 135792596 | 135879043 | 10182 | 2.16E-17 | 46 | 28 | INS | 2.16E-17 |
| 5-363 | 5 | 136525020 | 136546161 | NONE | gap called | 136525020 | 136546161 | 8809  | 7.30E-23 | 50 | 42 | INS | 7.30E-23 |
| 5-366 | 5 | 137290994 | 137290994 | NONE | gap called | 137290994 | 137290994 | 16159 | 0.00E+00 | 64 | 0  | INS | 0.00E+00 |
| 5-370 | 5 | 138187377 | 138206325 | NONE | gap called | 138187377 | 138206325 | 3380  | 1.03E-22 | 71 | 53 | INS | 1.03E-22 |
| 5-377 | 5 | 139851699 | 139851699 | NONE | gap called | 139851699 | 139851699 | 73650 | 0.00E+00 | 45 | 0  | INS | 0.00E+00 |
| 5-389 | 5 | 144429636 | 144429636 | NONE | gap called | 144429636 | 144429636 | 7183  | 0.00E+00 | 65 | 0  | INS | 0.00E+00 |
| 5-393 | 5 | 146005598 | 146025649 | NONE | gap called | 146005598 | 146025649 | 11855 | 7.30E-23 | 76 | 59 | INS | 7.30E-23 |
| 5-398 | 5 | 147418946 | 147458829 | NONE | gap called | 147418946 | 147458829 | 7350  | 6.49E-12 | 13 | 9  | INS | 6.49E-12 |
| 5-415 | 5 | 157069996 | 157115743 | NONE | gap called | 157069996 | 157115743 | 10748 | 7.30E-23 | 56 | 36 | INS | 7.30E-23 |
| 5-426 | 5 | 162389476 | 162389476 | NONE | gap called | 162389476 | 162389476 | 8042  | 0.00E+00 | 79 | 0  | INS | 0.00E+00 |
| 5-430 | 5 | 163317808 | 163317808 | NONE | gap called | 163317808 | 163317808 | 21004 | 0.00E+00 | 77 | 0  | INS | 0.00E+00 |
| 5-434 | 5 | 167876492 | 167911699 | NONE | gap called | 167876492 | 167911699 | 15614 | 7.30E-23 | 66 | 53 | INS | 7.30E-23 |
| 5-442 | 5 | 170396924 | 170420810 | NONE | gap called | 170396924 | 170420810 | 5246  | 7.30E-23 | 48 | 40 | INS | 7.30E-23 |
| 5-449 | 5 | 175044512 | 175114381 | NONE | gap called | 175044512 | 175114381 | 11182 | 7.30E-23 | 48 | 36 | INS | 7.30E-23 |
| 5-450 | 5 | 177178721 | 177178721 | NONE | gap called | 177178721 | 177178721 | 21126 | 0.00E+00 | 62 | 0  | INS | 0.00E+00 |
| 5-455 | 5 | 181449965 | 181505889 | NONE | gap called | 181449965 | 181505889 | 8696  | 7.30E-23 | 41 | 33 | INS | 7.30E-23 |
| 5-458 | 5 | 184688834 | 184704580 | NONE | gap called | 184688834 | 184704580 | 6295  | 7.30E-23 | 72 | 54 | INS | 7.30E-23 |
| 5-466 | 5 | 186557578 | 186593604 | NONE | gap called | 186557578 | 186593604 | 13298 | 7.30E-23 | 59 | 38 | INS | 7.30E-23 |
| 5-468 | 5 | 187234296 | 187234296 | NONE | gap called | 187234296 | 187234296 | 5425  | 7.30E-23 | 58 | 40 | INS | 7.30E-23 |
| 5-475 | 5 | 194874381 | 194924104 | NONE | gap called | 194874381 | 194924104 | 7646  | 7.30E-23 | 38 | 27 | INS | 7.30E-23 |
| 5-494 | 5 | 212045849 | 212075111 | NONE | gap called | 212045849 | 212075111 | 5532  | 2.82E-16 | 17 | 13 | INS | 2.82E-16 |
| 5-501 | 5 | 213959861 | 213984393 | NONE | gap called | 213959861 | 213984393 | 7919  | 7.30E-23 | 74 | 68 | INS | 7.30E-23 |
| 6-4   | 6 | 3262933   | 3268343   | NONE | gap called | 3262933   | 3268343   | 5369  | 8.15E-23 | 52 | 32 | INS | 8.15E-23 |
| 6-7   | 6 | 8428024   | 8428024   | NONE | gap called | 8428024   | 8428024   | 5591  | 1.63E-12 | 27 | 21 | INS | 1.63E-12 |
| 6-16  | 6 | 19338426  | 19357860  | NONE | gap called | 19338426  | 19357860  | 7987  | 8.15E-23 | 57 | 44 | INS | 8.15E-23 |
| 6-19  | 6 | 20128757  | 20137013  | NONE | gap called | 20128757  | 20137013  | 7311  | 8.15E-23 | 67 | 50 | INS | 8.15E-23 |
| 6-22  | 6 | 20760353  | 20760353  | NONE | gap called | 20760353  | 20760353  | 7478  | 0.00E+00 | 70 | 0  | INS | 0.00E+00 |
| 6-42  | 6 | 34610954  | 34628036  | NONE | gap called | 34610954  | 34628036  | 5689  | 8.15E-23 | 51 | 35 | INS | 8.15E-23 |
| 6-47  | 6 | 36556155  | 36601085  | NONE | gap called | 36556155  | 36601085  | 6260  | 8.15E-23 | 35 | 31 | INS | 8.15E-23 |
| 6-61  | 6 | 40228386  | 40228386  | NONE | gap called | 40228386  | 40228386  | 29670 | 0.00E+00 | 43 | 0  | INS | 0.00E+00 |
| 6-64  | 6 | 40839113  | 40857191  | NONE | gap called | 40839113  | 40857191  | 11398 | 8.15E-23 | 91 | 81 | INS | 8.15E-23 |
| 6-69  | 6 | 42373670  | 42401293  | NONE | gap called | 42373670  | 42401293  | 5608  | 8.15E-23 | 98 | 68 | INS | 8.15E-23 |
| 6-80  | 6 | 52630261  | 52702080  | NONE | gap called | 52630261  | 52702080  | 6814  | 1.43E-19 | 68 | 53 | INS | 1.43E-19 |
| 6-95  | 6 | 56228815  | 56266974  | NONE | gap called | 56228815  | 56266974  | 6049  | 8.15E-23 | 43 | 37 | INS | 8.15E-23 |
| 6-99  | 6 | 56815593  | 56865259  | NONE | gap called | 56815593  | 56865259  | 6234  | 8.15E-23 | 63 | 53 | INS | 8.15E-23 |
| 6-103 | 6 | 59946638  | 59993031  | NONE | gap called | 59946638  | 59993031  | 7153  | 8.15E-23 | 52 | 44 | INS | 8.15E-23 |
| 6-109 | 6 | 61653333  | 61674137  | NONE | gap called | 61653333  | 61674137  | 7952  | 8.15E-23 | 65 | 47 | INS | 8.15E-23 |
| 6-112 | 6 | 62488449  | 62488449  | NONE | gap called | 62488449  | 62488449  | 52345 | 0.00E+00 | 55 | 0  | INS | 0.00E+00 |
| 6-127 | 6 | 66363402  | 66397013  | NONE | gap called | 66363402  | 66397013  | 5478  | 8.15E-23 | 50 | 30 | INS | 8.15E-23 |
| 6-133 | 6 | 67748831  | 67802200  | NONE | gap called | 67748831  | 67802200  | 5455  | 3.86E-14 | 37 | 34 | INS | 3.86E-14 |
| 6-136 | 6 | 69592843  | 69635739  | NONE | gap called | 69592843  | 69635739  | 9705  | 8.15E-23 | 37 | 32 | INS | 8.15E-23 |
| 6-140 | 6 | 70564497  | 70578781  | NONE | gap called | 70564497  | 70578781  | 5167  | 8.15E-23 | 78 | 54 | INS | 8.15E-23 |
| 6-157 | 6 | 78829249  | 78867675  | NONE | gap called | 78829249  | 78867675  | 9137  | 8.15E-23 | 69 | 54 | INS | 8.15E-23 |
| 6-166 | 6 | 84796562  | 84807832  | NONE | gap called | 84796562  | 84807832  | 5569  | 8.15E-23 | 77 | 64 | INS | 8.15E-23 |
| 6-173 | 6 | 138394985 | 138394985 | NONE | gap called | 138394985 | 138394985 | 17713 | 0.00E+00 | 89 | 0  | INS | 0.00E+00 |
| 6-175 | 6 | 152925163 | 152994013 | NONE | gap called | 152925163 | 152994013 | 12538 | 8.15E-23 | 27 | 26 | INS | 8.15E-23 |
| 7-3   | 7 | 5786768   | 5786768   | NONE | gap called | 5786768   | 5786768   | 40714 | 0.00E+00 | 14 | 0  | INS | 0.00E+00 |
| 7-4   | 7 | 6146406   | 6146406   | NONE | gap called | 6146406   | 6146406   | 8516  | 7.74E-23 | 75 | 61 | INS | 7.74E-23 |
| 7-6   | 7 | 6504895   | 6504895   | NONE | gap called | 6504895   | 6504895   | 34224 | 0.00E+00 | 80 | 0  | INS | 0.00E+00 |
| 7-7   | 7 | 6675754   | 6806462   | NONE | gap called | 6675754   | 6806462   | 13184 | 2.98E-16 | 47 | 35 | INS | 2.98E-16 |
| 7-14  | 7 | 7853323   | 7853323   | NONE | gap called | 7853323   | 7853323   | 18398 | 0.00E+00 | 70 | 0  | INS | 0.00E+00 |
| 7-18  | 7 | 8851454   | 8871232   | NONE | gap called | 8851454   | 8871232   | 6473  | 7.74E-23 | 90 | 75 | INS | 7.74E-23 |
| 7-24  | 7 | 11462634  | 11462634  | NONE | gap called | 11462634  | 11462634  | 27994 | 0.00E+00 | 65 | 0  | INS | 0.00E+00 |
| 7-27  | 7 | 15189044  | 15230183  | NONE | gap called | 15189044  | 15230183  | 8512  | 7.74E-23 | 53 | 39 | INS | 7.74E-23 |
| 7-28  | 7 | 15348114  | 15374258  | NONE | gap called | 15348114  | 15374258  | 5493  | 7.74E-23 | 64 | 49 | INS | 7.74E-23 |
| 7-36  | 7 | 18805005  | 18860691  | NONE | gap called | 18805005  | 18860691  | 5876  | 9.45E-18 | 48 | 39 | INS | 9.45E-18 |
| 7-45  | 7 | 28179020  | 28202032  | NONE | gap called | 28179020  | 28202032  | 7379  | 7.74E-23 | 49 | 37 | INS | 7.74E-23 |
| 7-49  | 7 | 32209803  | 32234480  | NONE | gap called | 32209803  | 32234480  | 5786  | 7.74E-23 | 58 | 44 | INS | 7.74E-23 |
| 7-53  | 7 | 35143769  | 35143769  | NONE | gap called | 35143769  | 35143769  | 10056 | 3.49E-02 | 20 | 18 | INS | 3.49E-02 |
| 7-62  | 7 | 38482352  | 38511663  | NONE | gap called | 38482352  | 38511663  | 13145 | 7.74E-23 | 32 | 28 | INS | 7.74E-23 |
| 7-64  | 7 | 38856530  | 38857081  | NONE | gap called | 38856530  | 38857081  | 19602 | 7.74E-23 | 59 | 40 | INS | 7.74E-23 |
| 7-69  | 7 | 40350518  | 40382006  | NONE | gap called | 40350518  | 40382006  | 10941 | 7.74E-23 | 64 | 50 | INS | 7.74E-23 |
| 7-75  | 7 | 41661451  | 41706006  | NONE | gap called | 41661451  | 41706006  | 7686  | 7.74E-23 | 55 | 42 | INS | 7.74E-23 |
| 7-82  | 7 | 45049001  | 45054056  | NONE | gap called | 45049001  | 45054056  | 6011  | 7.74E-23 | 61 | 48 | INS | 7.74E-23 |
| 7-94  | 7 | 48254332  | 48254332  | NONE | gap called | 48254332  | 48254332  | 31450 | 0.00E+00 | 31 | 0  | INS | 0.00E+00 |
| 7-97  | 7 | 48626698  | 48626698  | NONE | gap called | 48626698  | 48626698  | 18314 | 0.00E+00 | 69 | 0  | INS | 0.00E+00 |
| 7-102 | 7 | 50122600  | 50158800  | NONE | gap called | 50122600  | 50158800  | 7700  | 7.74E-23 | 61 | 50 | INS | 7.74E-23 |
| 7-115 | 7 | 59462328  | 59523872  | NONE | gap called | 59462328  | 59523872  | 10142 | 7.74E-23 | 49 | 33 | INS | 7.74E-23 |
| 7-116 | 7 | 59581654  | 59669061  | NONE | gap called | 59581654  | 59669061  | 17101 | 7.74E-23 | 34 | 25 | INS | 7.74E-23 |
| 7-124 | 7 | 61940851  | 61940851  | NONE | gap called | 61940851  | 61940851  | 6914  | 0.00E+00 | 71 | 0  | INS | 0.00E+00 |
| 7-126 | 7 | 62499937  | 62527815  | NONE | gap called | 62499937  | 62527815  | 8450  | 7.74E-23 | 54 | 50 | INS | 7.74E-23 |
| 7-133 | 7 | 64169507  | 64181894  | NONE | gap called | 64169507  | 64181894  | 5151  | 7.74E-23 | 65 | 44 | INS | 7.74E-23 |
| 7-139 | 7 | 66101374  | 66108522  | NONE | gap called | 66101374  | 66108522  | 8789  | 7.74E-23 | 84 | 54 | INS | 7.74E-23 |
| 7-141 | 7 | 66644573  | 66653322  | NONE | gap called | 66644573  | 66653322  | 9834  | 7.74E-23 | 78 | 50 | INS | 7.74E-23 |
| 7-154 | 7 | 71840295  | 71840295  | NONE | gap called | 71840295  | 71840295  | 35707 | 0.00E+00 | 58 | 0  | INS | 0.00E+00 |
| 7-170 | 7 | 77047754  | 77174923  | NONE | gap called | 77047754  | 77174923  | 18571 | 7.74E-23 | 34 | 31 | INS | 7.74E-23 |
| 7-174 | 7 | 78316089  | 78351880  | NONE | gap called | 78316089  | 78351880  | 10343 | 7.74E-23 | 46 | 39 | INS | 7.74E-23 |
| 7-179 | 7 | 79906887  | 79980244  | NONE | gap called | 79906887  | 79980244  | 8935  | 7.74E-23 | 59 | 45 | INS | 7.74E-23 |
| 7-184 | 7 | 83550408  | 83567624  | NONE | gap called | 83550408  | 83567624  | 5370  | 7.74E-23 | 45 | 43 | INS | 7.74E-23 |
| 7-185 | 7 | 83637244  | 83694746  | NONE | gap called | 83637244  | 83694746  | 13564 | 7.74E-23 | 34 | 29 | INS | 7.74E-23 |
| 7-198 | 7 | 90562569  | 90594419  | NONE | gap called | 90562569  | 90594419  | 6065  | 7.74E-23 | 70 | 50 | INS | 7.74E-23 |
| 7-207 | 7 | 93928563  | 93971645  | NONE | gap called | 93928563  | 93971645  | 5403  | 7.74E-23 | 93 | 61 | INS | 7.74E-23 |
| 7-208 | 7 | 94106997  | 94163316  | NONE | gap called | 94106997  | 94163316  | 9521  | 7.74E-23 | 86 | 75 | INS | 7.74E-23 |
| 7-210 | 7 | 94601916  | 94601916  | NONE | gap called | 94601916  | 94601916  | 8745  | 0.00E+00 | 74 | 0  | INS | 0.00E+00 |
| 7-215 | 7 | 97956237  | 97983714  | NONE | gap called | 97956237  | 97983714  | 5517  | 7.74E-23 | 68 | 47 | INS | 7.74E-23 |
| 7-228 | 7 | 101000872 | 101012499 | NONE | gap called | 101000872 | 101012499 | 7613  | 7.74E-23 | 60 | 46 | INS | 7.74E-23 |
| 7-230 | 7 | 101643139 | 1         |      |            |           |           |       |          |    |    |     |          |

|       |   |            |           |      |            |            |           |       |          |     |    |     |          |
|-------|---|------------|-----------|------|------------|------------|-----------|-------|----------|-----|----|-----|----------|
| 7-265 | 7 | 125281611  | 125330472 | NONE | gap called | 125281611  | 125330472 | 10342 | 7.74E-23 | 83  | 63 | INS | 7.74E-23 |
| 7-272 | 7 | 135207999  | 135268791 | NONE | gap called | 135207999  | 135268791 | 8324  | 7.74E-23 | 50  | 38 | INS | 7.74E-23 |
| 7-288 | 7 | 139674346  | 139738538 | NONE | gap called | 139674346  | 139738538 | 7156  | 9.45E-18 | 43  | 34 | INS | 9.45E-18 |
| 7-291 | 7 | 140292538  | 140336430 | NONE | gap called | 140292538  | 140336430 | 15290 | 1.09E-22 | 35  | 28 | INS | 1.09E-22 |
| 7-293 | 7 | 144021649  | 144158857 | NONE | gap called | 144021649  | 144158857 | 21828 | 1.04E-19 | 25  | 17 | INS | 1.04E-19 |
| 7-295 | 7 | 144340952  | 144384211 | NONE | gap called | 144340952  | 144384211 | 5355  | 3.82E-13 | 28  | 22 | INS | 3.82E-13 |
| 7-308 | 7 | 159500960  | 159515972 | NONE | gap called | 159500960  | 159515972 | 5329  | 7.74E-23 | 88  | 54 | INS | 7.74E-23 |
| 7-317 | 7 | 169427941  | 169427941 | NONE | gap called | 169427941  | 169427941 | 7878  | 0.00E+00 | 68  | 0  | INS | 0.00E+00 |
| 8-5   | 8 | 4996971    | 5039358   | NONE | gap called | 4996971    | 5039358   | 3301  | 2.47E-11 | 70  | 49 | INS | 2.47E-11 |
| 8-7   | 8 | 5121681    | 5183148   | NONE | gap called | 5121681    | 5183148   | 11921 | 6.97E-23 | 62  | 48 | INS | 6.97E-23 |
| 8-8   | 8 | 5298236    | 5311267   | NONE | gap called | 5298236    | 5311267   | 5883  | 6.97E-23 | 54  | 48 | INS | 6.97E-23 |
| 8-9   | 8 | 5542885    | 5545592   | NONE | gap called | 5542885    | 5545592   | 6734  | 8.70E-23 | 42  | 29 | INS | 8.70E-23 |
| 8-19  | 8 | 9048505    | 9100427   | NONE | gap called | 9048505    | 9100427   | 17568 | 6.97E-23 | 70  | 52 | INS | 6.97E-23 |
| 8-28  | 8 | 11383246   | 11398070  | NONE | gap called | 11383246   | 11398070  | 5028  | 6.97E-23 | 112 | 75 | INS | 6.97E-23 |
| 8-38  | 8 | 12729659   | 12826152  | NONE | gap called | 12729659   | 12826152  | 13056 | 8.68E-23 | 65  | 52 | INS | 8.68E-23 |
| 8-42  | 8 | 14009604   | 14022130  | NONE | gap called | 14009604   | 14022130  | 8094  | 6.97E-23 | 31  | 25 | INS | 6.97E-23 |
| 8-48  | 8 | 16256578   | 16256578  | NONE | gap called | 16256578   | 16256578  | 95319 | 0.00E+00 | 59  | 0  | INS | 0.00E+00 |
| 8-49  | 8 | 16256578   | 16267813  | NONE | gap called | 16256578   | 16267813  | 5623  | 6.97E-23 | 63  | 38 | INS | 6.97E-23 |
| 8-51  | 8 | 16956754   | 17034945  | NONE | gap called | 16956754   | 17034945  | 5693  | 1.58E-13 | 78  | 60 | INS | 1.58E-13 |
| 8-52  | 8 | 17048896   | 17096415  | NONE | gap called | 17048896   | 17096415  | 6515  | 6.97E-23 | 89  | 67 | INS | 6.97E-23 |
| 8-65  | 8 | 21300180   | 21311133  | NONE | gap called | 21300180   | 21311133  | 6788  | 6.97E-23 | 75  | 63 | INS | 6.97E-23 |
| 8-66  | 8 | 21504305   | 21548858  | NONE | gap called | 21504305   | 21548858  | 8065  | 6.97E-23 | 49  | 37 | INS | 6.97E-23 |
| 8-72  | 8 | 24035610   | 24035610  | NONE | gap called | 24035610   | 24035610  | 96240 | 0.00E+00 | 39  | 0  | INS | 0.00E+00 |
| 8-83  | 8 | 26726363   | 26741130  | NONE | gap called | 26726363   | 26741130  | 7372  | 6.97E-23 | 68  | 45 | INS | 6.97E-23 |
| 8-93  | 8 | 29189259   | 29217362  | NONE | gap called | 29189259   | 29217362  | 8192  | 6.97E-23 | 49  | 42 | INS | 6.97E-23 |
| 8-98  | 8 | 32797589   | 32855555  | NONE | gap called | 32797589   | 32855555  | 8182  | 6.97E-23 | 54  | 44 | INS | 6.97E-23 |
| 8-101 | 8 | 33303401   | 33320967  | NONE | gap called | 33303401   | 33320967  | 5337  | 6.97E-23 | 57  | 38 | INS | 6.97E-23 |
| 8-102 | 8 | 33334024   | 33373482  | NONE | gap called | 33334024   | 33373482  | 5841  | 6.97E-23 | 51  | 42 | INS | 6.97E-23 |
| 8-105 | 8 | 34696496   | 34788680  | NONE | gap called | 34696496   | 34788680  | 15801 | 2.54E-22 | 21  | 18 | INS | 2.54E-22 |
| 8-114 | 8 | 37815654   | 37815654  | NONE | gap called | 37815654   | 37815654  | 55299 | 0.00E+00 | 43  | 0  | INS | 0.00E+00 |
| 8-116 | 8 | 38213985   | 38213985  | NONE | gap called | 38213985   | 38213985  | 25261 | 0.00E+00 | 29  | 0  | INS | 0.00E+00 |
| 8-122 | 8 | 39449255   | 39472046  | NONE | gap called | 39449255   | 39472046  | 5039  | 6.97E-23 | 19  | 15 | INS | 6.97E-23 |
| 8-123 | 8 | 39603407   | 39652892  | NONE | gap called | 39603407   | 39652892  | 44994 | 8.70E-23 | 35  | 25 | INS | 8.70E-23 |
| 8-137 | 8 | 43606354   | 43673656  | NONE | gap called | 43606354   | 43673656  | 8036  | 6.97E-23 | 58  | 46 | INS | 6.97E-23 |
| 8-140 | 8 | 44429929   | 44429929  | NONE | gap called | 44429929   | 44429929  | 8831  | 0.00E+00 | 77  | 0  | INS | 0.00E+00 |
| 8-146 | 8 | 50511459   | 50547274  | NONE | gap called | 50511459   | 50547274  | 6367  | 8.59E-23 | 51  | 39 | INS | 8.59E-23 |
| 8-147 | 8 | 50587829   | 50654805  | NONE | gap called | 50587829   | 50654805  | 2500  | 9.61E-04 | 59  | 50 | INS | 9.61E-04 |
| 8-153 | 8 | 53410647   | 53438335  | NONE | gap called | 53410647   | 53438335  | 9067  | 6.97E-23 | 52  | 37 | INS | 6.97E-23 |
| 8-154 | 8 | 53801715   | 53862705  | NONE | gap called | 53801715   | 53862705  | 9749  | 2.54E-22 | 31  | 22 | INS | 2.54E-22 |
| 8-164 | 8 | 55969345   | 55994769  | NONE | gap called | 55969345   | 55994769  | 5311  | 6.97E-23 | 69  | 53 | INS | 6.97E-23 |
| 8-175 | 8 | 63320333   | 63345296  | NONE | gap called | 63320333   | 63345296  | 6526  | 6.97E-23 | 65  | 40 | INS | 6.97E-23 |
| 8-188 | 8 | 65860765   | 65860765  | NONE | gap called | 65860765   | 65860765  | 20772 | 0.00E+00 | 56  | 0  | INS | 0.00E+00 |
| 8-196 | 8 | 69817048   | 69844423  | NONE | gap called | 69817048   | 69844423  | 8604  | 6.97E-23 | 78  | 65 | INS | 6.97E-23 |
| 8-199 | 8 | 70361032   | 70406905  | NONE | gap called | 70361032   | 70406905  | 5023  | 5.42E-21 | 49  | 47 | INS | 5.42E-21 |
| 8-200 | 8 | 70671598   | 70690819  | NONE | gap called | 70671598   | 70690819  | 5521  | 6.97E-23 | 40  | 35 | INS | 6.97E-23 |
| 8-202 | 8 | 71417804   | 71434165  | NONE | gap called | 71417804   | 71434165  | 5778  | 6.97E-23 | 78  | 65 | INS | 6.97E-23 |
| 8-209 | 8 | 74013974   | 74085167  | NONE | gap called | 74013974   | 74085167  | 7728  | 7.36E-14 | 48  | 28 | INS | 7.36E-14 |
| 8-215 | 8 | 75979180   | 76033096  | NONE | gap called | 75979180   | 76033096  | 7827  | 6.97E-23 | 57  | 45 | INS | 6.97E-23 |
| 8-219 | 8 | 76821111   | 76856028  | NONE | gap called | 76821111   | 76856028  | 8204  | 6.97E-23 | 70  | 62 | INS | 6.97E-23 |
| 8-234 | 8 | 82658872   | 82616088  | NONE | gap called | 82658872   | 82616088  | 5901  | 6.97E-23 | 64  | 49 | INS | 6.97E-23 |
| 8-253 | 8 | 97518874   | 97570766  | NONE | gap called | 97518874   | 97570766  | 5864  | 2.07E-17 | 49  | 35 | INS | 2.07E-17 |
| 8-254 | 8 | 97658142   | 97705217  | NONE | gap called | 97658142   | 97705217  | 7642  | 6.97E-23 | 57  | 41 | INS | 6.97E-23 |
| 8-263 | 8 | 110573709  | 110630926 | NONE | gap called | 110573709  | 110630926 | 5922  | 3.53E-10 | 31  | 23 | INS | 3.53E-10 |
| 8-265 | 8 | 112449571  | 112492261 | NONE | gap called | 112449571  | 112492261 | 6528  | 6.97E-23 | 54  | 43 | INS | 6.97E-23 |
| 8-272 | 8 | 116171929  | 116208571 | NONE | gap called | 116171929  | 116208571 | 6323  | 6.97E-23 | 49  | 41 | INS | 6.97E-23 |
| 8-273 | 8 | 116277513  | 116321299 | NONE | gap called | 116277513  | 116321299 | 7179  | 6.97E-23 | 46  | 37 | INS | 6.97E-23 |
| 8-274 | 8 | 116562218  | 116626150 | NONE | gap called | 116562218  | 116626150 | 11046 | 2.35E-19 | 22  | 16 | INS | 2.35E-19 |
| 8-278 | 8 | 118775804  | 118791901 | NONE | gap called | 118775804  | 118791901 | 5868  | 6.97E-23 | 73  | 51 | INS | 6.97E-23 |
| 8-281 | 8 | 119543767  | 119564805 | NONE | gap called | 119543767  | 119564805 | 6588  | 6.97E-23 | 49  | 45 | INS | 6.97E-23 |
| 8-286 | 8 | 127143846  | 127143846 | NONE | gap called | 127143846  | 127143846 | 20642 | 0.00E+00 | 50  | 0  | INS | 0.00E+00 |
| 8-289 | 8 | 127761645  | 127772510 | NONE | gap called | 127761645  | 127772510 | 5804  | 6.97E-23 | 58  | 45 | INS | 6.97E-23 |
| 8-295 | 8 | 129150163  | 129150163 | NONE | gap called | 129150163  | 129150163 | 7470  | 6.97E-23 | 70  | 56 | INS | 6.97E-23 |
| 8-302 | 8 | 1305493746 | 130566720 | NONE | gap called | 1305493746 | 130566720 | 9658  | 6.97E-23 | 46  | 39 | INS | 6.97E-23 |
| 8-304 | 8 | 130758950  | 130766786 | NONE | gap called | 130758950  | 130766786 | 6599  | 6.97E-23 | 52  | 40 | INS | 6.97E-23 |
| 8-325 | 8 | 137340404  | 137440908 | NONE | gap called | 137340404  | 137440908 | 30953 | 6.97E-23 | 48  | 36 | INS | 6.97E-23 |
| 8-326 | 8 | 137440908  | 137440908 | NONE | gap called | 137440908  | 137440908 | 10934 | 0.00E+00 | 56  | 0  | INS | 0.00E+00 |
| 8-327 | 8 | 137661952  | 137673757 | NONE | gap called | 137661952  | 137673757 | 8508  | 6.97E-23 | 62  | 52 | INS | 6.97E-23 |
| 8-330 | 8 | 144858718  | 144928905 | NONE | gap called | 144858718  | 144928905 | 11807 | 6.97E-23 | 47  | 40 | INS | 6.97E-23 |
| 8-338 | 8 | 148787427  | 148830719 | NONE | gap called | 148787427  | 148830719 | 9017  | 6.97E-23 | 69  | 45 | INS | 6.97E-23 |
| 8-343 | 8 | 149791671  | 149836366 | NONE | gap called | 149791671  | 149836366 | 6099  | 6.97E-23 | 54  | 43 | INS | 6.97E-23 |
| 8-344 | 8 | 149957971  | 150009523 | NONE | gap called | 149957971  | 150009523 | 8010  | 6.97E-23 | 59  | 51 | INS | 6.97E-23 |
| 8-350 | 8 | 151071454  | 151100724 | NONE | gap called | 151071454  | 151100724 | 5590  | 6.97E-23 | 54  | 39 | INS | 6.97E-23 |
| 8-351 | 8 | 152262090  | 152308625 | NONE | gap called | 152262090  | 152308625 | 8259  | 6.97E-23 | 63  | 54 | INS | 6.97E-23 |
| 8-366 | 8 | 162830765  | 162891690 | NONE | gap called | 162830765  | 162891690 | 10351 | 6.97E-23 | 54  | 45 | INS | 6.97E-23 |
| 8-367 | 8 | 163027109  | 163027109 | NONE | gap called | 163027109  | 163027109 | 5575  | 6.97E-23 | 61  | 47 | INS | 6.97E-23 |
| 8-368 | 8 | 163671794  | 163688068 | NONE | gap called | 163671794  | 163688068 | 6898  | 6.97E-23 | 41  | 36 | INS | 6.97E-23 |
| 8-372 | 8 | 170464570  | 170464570 | NONE | gap called | 170464570  | 170464570 | 35023 | 0.00E+00 | 81  | 0  | INS | 0.00E+00 |
| 8-375 | 8 | 170962330  | 171025359 | NONE | gap called | 170962330  | 171025359 | 8924  | 6.97E-23 | 68  | 45 | INS | 6.97E-23 |
| 9-1   | 9 | 465299     | 492154    | NONE | gap called | 465299     | 492154    | 9222  | 7.33E-23 | 54  | 46 | INS | 7.33E-23 |
| 9-9   | 9 | 5679757    | 5755616   | NONE | gap called | 5679757    | 5755616   | 13769 | 7.33E-23 | 48  | 39 | INS | 7.33E-23 |
| 9-14  | 9 | 10382940   | 10425098  | NONE | gap called | 10382940   | 10425098  | 6642  | 7.33E-23 | 56  | 44 | INS | 7.33E-23 |
| 9-18  | 9 | 17691449   | 17691449  | NONE | gap called | 17691449   | 17691449  | 89728 | 0.00E+00 | 52  | 0  | INS | 0.00E+00 |
| 9-19  | 9 | 18688461   | 18767137  | NONE | gap called | 18688461   | 18767137  | 10352 | 7.33E-23 | 44  | 37 | INS | 7.33E-23 |
| 9-27  | 9 | 21489334   | 21489334  | NONE | gap called | 21489334   | 21489334  | 37714 | 0.00E+00 | 84  | 0  | INS | 0.00E+00 |
| 9-30  | 9 | 21872482   | 21872482  | NONE | gap called | 21872482   | 21872482  | 14171 | 0.00E+00 | 85  | 0  | INS | 0.00E+00 |
| 9-50  | 9 | 33975418   | 33994993  | NONE | gap called | 33975418   | 33994993  | 5273  | 7.33E-23 | 97  | 81 | INS | 7.33E-23 |
| 9-57  | 9 | 36583180   | 36583180  | NONE | gap called | 36583180   | 36583180  | 20046 | 0.00E+00 | 52  | 0  | INS | 0.00E+0  |

|        |    |           |           |      |            |           |           |        |          |    |    |     |          |
|--------|----|-----------|-----------|------|------------|-----------|-----------|--------|----------|----|----|-----|----------|
| 9-90   | 9  | 50164796  | 50164796  | NONE | gap called | 50164796  | 50164796  | 10593  | 0.00E+00 | 47 | 0  | INS | 0.00E+00 |
| 9-93   | 9  | 52705505  | 52738677  | NONE | gap called | 52705505  | 52738677  | 6291   | 7.33E-23 | 69 | 60 | INS | 7.33E-23 |
| 9-94   | 9  | 52782747  | 52833515  | NONE | gap called | 52782747  | 52833515  | 5985   | 7.33E-23 | 64 | 52 | INS | 7.33E-23 |
| 9-99   | 9  | 55056046  | 55071185  | NONE | gap called | 55056046  | 55071185  | 7945   | 7.33E-23 | 67 | 47 | INS | 7.33E-23 |
| 9-103  | 9  | 56149597  | 56190180  | NONE | gap called | 56149597  | 56190180  | 5540   | 7.33E-23 | 56 | 42 | INS | 7.33E-23 |
| 9-105  | 9  | 56901345  | 56954562  | NONE | gap called | 56901345  | 56954562  | 6030   | 1.51E-20 | 58 | 40 | INS | 1.51E-20 |
| 9-111  | 9  | 59670880  | 59670880  | NONE | gap called | 59670880  | 59670880  | 7545   | 0.00E+00 | 61 | 0  | INS | 0.00E+00 |
| 9-127  | 9  | 67177843  | 67192685  | NONE | gap called | 67177843  | 67192685  | 8721   | 7.33E-23 | 84 | 67 | INS | 7.33E-23 |
| 9-136  | 9  | 70076185  | 70076185  | NONE | gap called | 70076185  | 70076185  | 12888  | 0.00E+00 | 57 | 0  | INS | 0.00E+00 |
| 9-142  | 9  | 71337510  | 71363585  | NONE | gap called | 71337510  | 71363585  | 6782   | 7.33E-23 | 52 | 43 | INS | 7.33E-23 |
| 9-155  | 9  | 75575632  | 75651117  | NONE | gap called | 75575632  | 75651117  | 7069   | 2.84E-07 | 18 | 18 | INS | 2.84E-07 |
| 9-159  | 9  | 76380115  | 76424998  | NONE | gap called | 76380115  | 76424998  | 7577   | 7.33E-23 | 62 | 45 | INS | 7.33E-23 |
| 9-168  | 9  | 80244780  | 80251217  | NONE | gap called | 80244780  | 80251217  | 13582  | 7.33E-23 | 69 | 59 | INS | 7.33E-23 |
| 9-172  | 9  | 81135082  | 81135082  | NONE | gap called | 81135082  | 81135082  | 10862  | 0.00E+00 | 73 | 0  | INS | 0.00E+00 |
| 9-174  | 9  | 81586458  | 81685431  | NONE | gap called | 81586458  | 81685431  | 10781  | 6.48E-12 | 28 | 22 | INS | 6.48E-12 |
| 9-190  | 9  | 87680798  | 87733239  | NONE | gap called | 87680798  | 87733239  | 3614   | 2.62E-11 | 70 | 57 | INS | 2.62E-11 |
| 9-192  | 9  | 87846509  | 87846509  | NONE | gap called | 87846509  | 87846509  | 11014  | 0.00E+00 | 80 | 0  | INS | 0.00E+00 |
| 9-199  | 9  | 90116594  | 90155560  | NONE | gap called | 90116594  | 90155560  | 7192   | 7.33E-23 | 71 | 49 | INS | 7.33E-23 |
| 9-214  | 9  | 93824913  | 93862623  | NONE | gap called | 93824913  | 93862623  | 2320   | 5.53E-08 | 71 | 52 | INS | 5.53E-08 |
| 9-215  | 9  | 94368403  | 94441119  | NONE | gap called | 94368403  | 94441119  | 7383   | 7.33E-23 | 65 | 57 | INS | 7.33E-23 |
| 9-217  | 9  | 94734593  | 94734593  | NONE | gap called | 94734593  | 94734593  | 76163  | 0.00E+00 | 70 | 0  | INS | 0.00E+00 |
| 9-219  | 9  | 95122824  | 95185806  | NONE | gap called | 95122824  | 95185806  | 17196  | 1.05E-22 | 31 | 25 | INS | 1.05E-22 |
| 9-222  | 9  | 95653884  | 95653884  | NONE | gap called | 95653884  | 95653884  | 8624   | 0.00E+00 | 76 | 0  | INS | 0.00E+00 |
| 9-225  | 9  | 96146734  | 96188706  | NONE | gap called | 96146734  | 96188706  | 11421  | 7.33E-23 | 80 | 61 | INS | 7.33E-23 |
| 9-228  | 9  | 96791153  | 96897003  | NONE | gap called | 96791153  | 96897003  | 20308  | 7.33E-23 | 40 | 34 | INS | 7.33E-23 |
| 9-230  | 9  | 97039773  | 97105392  | NONE | gap called | 97039773  | 97105392  | 11318  | 7.33E-23 | 37 | 36 | INS | 7.33E-23 |
| 9-235  | 9  | 98074237  | 98142822  | NONE | gap called | 98074237  | 98142822  | 6996   | 2.18E-17 | 48 | 40 | INS | 2.18E-17 |
| 9-238  | 9  | 98505389  | 98510518  | NONE | gap called | 98505389  | 98510518  | 4261   | 1.03E-22 | 62 | 39 | INS | 1.03E-22 |
| 9-246  | 9  | 103446339 | 103496639 | NONE | gap called | 103446339 | 103496639 | 11754  | 7.33E-23 | 52 | 40 | INS | 7.33E-23 |
| 9-247  | 9  | 103605663 | 103642148 | NONE | gap called | 103605663 | 103642148 | 5480   | 7.33E-23 | 47 | 39 | INS | 7.33E-23 |
| 9-248  | 9  | 103685281 | 103714255 | NONE | gap called | 103685281 | 103714255 | 5678   | 7.33E-23 | 40 | 31 | INS | 7.33E-23 |
| 9-249  | 9  | 106227695 | 106298259 | NONE | gap called | 106227695 | 106298259 | 7660   | 7.33E-23 | 64 | 48 | INS | 7.33E-23 |
| 9-257  | 9  | 113333171 | 113359889 | NONE | gap called | 113333171 | 113359889 | 4672   | 1.04E-22 | 67 | 52 | INS | 1.04E-22 |
| 9-263  | 9  | 114314861 | 114413230 | NONE | gap called | 114314861 | 114413230 | 16714  | 1.02E-22 | 26 | 19 | INS | 1.02E-22 |
| 9-270  | 9  | 119177159 | 119228639 | NONE | gap called | 119177159 | 119228639 | 14372  | 7.33E-23 | 51 | 42 | INS | 7.33E-23 |
| 9-272  | 9  | 119956340 | 119989145 | NONE | gap called | 119956340 | 119989145 | 6836   | 7.33E-23 | 47 | 40 | INS | 7.33E-23 |
| 9-282  | 9  | 131192772 | 131249785 | NONE | gap called | 131192772 | 131249785 | 20173  | 7.33E-23 | 19 | 15 | INS | 7.33E-23 |
| 9-297  | 9  | 135990555 | 136013153 | NONE | gap called | 135990555 | 136013153 | 7111   | 7.33E-23 | 62 | 49 | INS | 7.33E-23 |
| 9-298  | 9  | 136159869 | 136197783 | NONE | gap called | 136159869 | 136197783 | 10617  | 7.33E-23 | 72 | 53 | INS | 7.33E-23 |
| 9-299  | 9  | 136300377 | 136323187 | NONE | gap called | 136300377 | 136323187 | 6886   | 7.33E-23 | 85 | 61 | INS | 7.33E-23 |
| 9-302  | 9  | 137043720 | 137043720 | NONE | gap called | 137043720 | 137043720 | 5063   | 7.33E-23 | 70 | 46 | INS | 7.33E-23 |
| 9-309  | 9  | 138549921 | 138588573 | NONE | gap called | 138549921 | 138588573 | 7580   | 7.33E-23 | 38 | 29 | INS | 7.33E-23 |
| 9-313  | 9  | 139526353 | 139564244 | NONE | gap called | 139526353 | 139564244 | 7400   | 7.33E-23 | 57 | 49 | INS | 7.33E-23 |
| 9-319  | 9  | 141737080 | 141782681 | NONE | gap called | 141737080 | 141782681 | 26143  | 1.01E-22 | 41 | 29 | INS | 1.01E-22 |
| 9-327  | 9  | 144049258 | 144049258 | NONE | gap called | 144049258 | 144049258 | 56683  | 0.00E+00 | 55 | 0  | INS | 0.00E+00 |
| 9-348  | 9  | 150383836 | 150383836 | NONE | gap called | 150383836 | 150383836 | 68404  | 0.00E+00 | 67 | 0  | INS | 0.00E+00 |
| 10-3   | 10 | 582675    | 613836    | NONE | gap called | 582675    | 613836    | 8855   | 7.28E-23 | 87 | 63 | INS | 7.28E-23 |
| 10-6   | 10 | 943926    | 943926    | NONE | gap called | 943926    | 943926    | 8517   | 0.00E+00 | 94 | 0  | INS | 0.00E+00 |
| 10-11  | 10 | 3028862   | 3059192   | NONE | gap called | 3028862   | 3059192   | 4401   | 7.28E-23 | 78 | 58 | INS | 7.28E-23 |
| 10-15  | 10 | 4470979   | 4594188   | NONE | gap called | 4470979   | 4594188   | 17347  | 3.83E-20 | 28 | 22 | INS | 3.83E-20 |
| 10-22  | 10 | 9396295   | 9445431   | NONE | gap called | 9396295   | 9445431   | 10692  | 7.28E-23 | 65 | 60 | INS | 7.28E-23 |
| 10-25  | 10 | 9971488   | 9979947   | NONE | gap called | 9971488   | 9979947   | 5207   | 7.28E-23 | 86 | 67 | INS | 7.28E-23 |
| 10-29  | 10 | 10666176  | 10709109  | NONE | gap called | 10666176  | 10709109  | 8196   | 7.28E-23 | 62 | 53 | INS | 7.28E-23 |
| 10-35  | 10 | 16470286  | 16488835  | NONE | gap called | 16470286  | 16488835  | 6212   | 7.28E-23 | 55 | 44 | INS | 7.28E-23 |
| 10-39  | 10 | 17163413  | 17163413  | NONE | gap called | 17163413  | 17163413  | 20418  | 0.00E+00 | 76 | 0  | INS | 0.00E+00 |
| 10-41  | 10 | 18319332  | 18359693  | NONE | gap called | 18319332  | 18359693  | 3792   | 7.90E-14 | 49 | 40 | INS | 7.90E-14 |
| 10-43  | 10 | 18556000  | 18578234  | NONE | gap called | 18556000  | 18578234  | 13396  | 7.28E-23 | 45 | 33 | INS | 7.28E-23 |
| 10-45  | 10 | 18789616  | 18897046  | NONE | gap called | 18789616  | 18897046  | 5721   | 5.12E-04 | 31 | 24 | INS | 5.12E-04 |
| 10-47  | 10 | 19115115  | 19115115  | NONE | gap called | 19115115  | 19115115  | 128294 | 0.00E+00 | 42 | 0  | INS | 0.00E+00 |
| 10-53  | 10 | 24334091  | 24429877  | NONE | gap called | 24334091  | 24429877  | 17572  | 7.28E-23 | 28 | 19 | INS | 7.28E-23 |
| 10-55  | 10 | 25824615  | 25863072  | NONE | gap called | 25824615  | 25863072  | 7865   | 7.28E-23 | 77 | 62 | INS | 7.28E-23 |
| 10-71  | 10 | 32004394  | 32043509  | NONE | gap called | 32004394  | 32043509  | 7235   | 7.28E-23 | 74 | 54 | INS | 7.28E-23 |
| 10-75  | 10 | 35605312  | 35630696  | NONE | gap called | 35605312  | 35630696  | 6685   | 7.28E-23 | 46 | 35 | INS | 7.28E-23 |
| 10-76  | 10 | 36153339  | 36190009  | NONE | gap called | 36153339  | 36190009  | 11080  | 7.28E-23 | 31 | 25 | INS | 7.28E-23 |
| 10-82  | 10 | 41948163  | 41948163  | NONE | gap called | 41948163  | 41948163  | 7841   | 0.00E+00 | 59 | 0  | INS | 0.00E+00 |
| 10-86  | 10 | 42514907  | 42604437  | NONE | gap called | 42514907  | 42604437  | 10205  | 7.79E-22 | 58 | 38 | INS | 7.79E-22 |
| 10-91  | 10 | 46214504  | 46229883  | NONE | gap called | 46214504  | 46229883  | 6460   | 7.28E-23 | 52 | 44 | INS | 7.28E-23 |
| 10-92  | 10 | 46494545  | 46537748  | NONE | gap called | 46494545  | 46537748  | 22388  | 7.28E-23 | 48 | 36 | INS | 7.28E-23 |
| 10-94  | 10 | 46753895  | 46774942  | NONE | gap called | 46753895  | 46774942  | 7275   | 7.28E-23 | 54 | 44 | INS | 7.28E-23 |
| 10-105 | 10 | 53142434  | 53169455  | NONE | gap called | 53142434  | 53169455  | 9932   | 7.28E-23 | 49 | 34 | INS | 7.28E-23 |
| 10-108 | 10 | 53571055  | 53607697  | NONE | gap called | 53571055  | 53607697  | 11655  | 7.28E-23 | 48 | 40 | INS | 7.28E-23 |
| 10-110 | 10 | 54064292  | 54107756  | NONE | gap called | 54064292  | 54107756  | 10737  | 7.28E-23 | 58 | 42 | INS | 7.28E-23 |
| 10-131 | 10 | 61329910  | 61370540  | NONE | gap called | 61329910  | 61370540  | 8351   | 7.28E-23 | 64 | 48 | INS | 7.28E-23 |
| 10-152 | 10 | 72544635  | 72575873  | NONE | gap called | 72544635  | 72575873  | 7177   | 7.28E-23 | 41 | 34 | INS | 7.28E-23 |
| 10-154 | 10 | 73073263  | 73109913  | NONE | gap called | 73073263  | 73109913  | 6501   | 7.28E-23 | 68 | 59 | INS | 7.28E-23 |
| 10-157 | 10 | 73901539  | 73972356  | NONE | gap called | 73901539  | 73972356  | 7197   | 7.19E-10 | 30 | 21 | INS | 7.19E-10 |
| 10-159 | 10 | 74129629  | 74214062  | NONE | gap called | 74129629  | 74214062  | 15231  | 7.28E-23 | 49 | 32 | INS | 7.28E-23 |
| 10-162 | 10 | 75010539  | 75051999  | NONE | gap called | 75010539  | 75051999  | 8886   | 7.28E-23 | 41 | 33 | INS | 7.28E-23 |
| 10-163 | 10 | 75417885  | 75463249  | NONE | gap called | 75417885  | 75463249  | 5565   | 7.28E-23 | 56 | 50 | INS | 7.28E-23 |
| 10-165 | 10 | 75712214  | 75767290  | NONE | gap called | 75712214  | 75767290  | 11113  | 7.28E-23 | 68 | 46 | INS | 7.28E-23 |
| 10-168 | 10 | 76273228  | 76306402  | NONE | gap called | 76273228  | 76306402  | 8025   | 7.28E-23 | 48 | 33 | INS | 7.28E-23 |
| 10-172 | 10 | 77124202  | 77124202  | NONE | gap called | 77124202  | 77124202  | 35761  | 0.00E+00 | 38 | 0  | INS | 0.00E+00 |
| 10-173 | 10 | 77254326  | 77254326  | NONE | gap called | 77254326  | 77254326  | 27050  | 0.00E+00 | 54 | 0  | INS | 0.00E+00 |
| 10-185 | 10 | 83823289  | 83830304  | NONE | gap called | 83823289  | 83830304  | 6102   | 7.28E-23 | 36 | 26 | INS | 7.28E-23 |
| 10-193 | 10 | 86942438  | 86943962  | NONE | gap called | 86942438  | 86943962  | 7982   | 7.28E-23 | 53 | 43 | INS | 7.28E-23 |
| 10-197 | 10 | 90877689  | 90911096  | NONE | gap called | 90877689  | 90911096  | 9014   | 7.28E-23 | 47 | 37 | INS | 7.28E-23 |
| 10-199 | 10 | 92219357  | 92219357  | NONE | gap called | 92219357  | 92219357  | 33005  | 0.00E+00 |    |    |     |          |

|        |    |           |           |             |            |           |           |       |          |    |    |       |          |                                           |
|--------|----|-----------|-----------|-------------|------------|-----------|-----------|-------|----------|----|----|-------|----------|-------------------------------------------|
| 10-219 | 10 | 103578560 | 103644561 | NONE        | gap called | 103578560 | 103644561 | 12605 | 7.28E-23 | 56 | 51 | INS   | 7.28E-23 |                                           |
| 10-225 | 10 | 105047950 | 105047950 | NONE        | gap called | 105047950 | 105047950 | 36910 | 0.00E+00 | 47 | 0  | INS   | 0.00E+00 |                                           |
| 10-227 | 10 | 105389485 | 105389485 | NONE        | gap called | 105389485 | 105389485 | 77871 | 0.00E+00 | 67 | 0  | INS   | 0.00E+00 |                                           |
| 10-230 | 10 | 105727793 | 105827543 | NONE        | gap called | 105727793 | 105827543 | 14284 | 7.28E-23 | 54 | 40 | INS   | 7.28E-23 |                                           |
| 10-233 | 10 | 106842418 | 106880595 | NONE        | gap called | 106842418 | 106880595 | 7688  | 7.28E-23 | 59 | 41 | INS   | 7.28E-23 |                                           |
| 10-238 | 10 | 107559358 | 107587892 | NONE        | gap called | 107559358 | 107587892 | 5226  | 7.28E-23 | 85 | 63 | INS   | 7.28E-23 |                                           |
| 10-239 | 10 | 107819309 | 107828188 | NONE        | gap called | 107819309 | 107828188 | 8395  | 7.28E-23 | 77 | 56 | INS   | 7.28E-23 |                                           |
| 10-242 | 10 | 108349909 | 108381565 | NONE        | gap called | 108349909 | 108381565 | 5945  | 7.28E-23 | 79 | 57 | INS   | 7.28E-23 |                                           |
| 10-243 | 10 | 108393396 | 108426567 | NONE        | gap called | 108393396 | 108426567 | 7951  | 7.28E-23 | 77 | 54 | INS   | 7.28E-23 |                                           |
| 10-252 | 10 | 110434668 | 110447580 | NONE        | gap called | 110434668 | 110447580 | 5836  | 7.28E-23 | 59 | 43 | INS   | 7.28E-23 |                                           |
| 10-253 | 10 | 110447580 | 110464324 | NONE        | gap called | 110447580 | 110464324 | 5879  | 7.28E-23 | 56 | 45 | INS   | 7.28E-23 |                                           |
| 10-256 | 10 | 110766032 | 110766032 | NONE        | gap called | 110766032 | 110766032 | 63198 | 0.00E+00 | 50 | 0  | INS   | 0.00E+00 |                                           |
| 10-263 | 10 | 112642883 | 112642883 | NONE        | gap called | 112642883 | 112642883 | 18253 | 0.00E+00 | 70 | 0  | INS   | 0.00E+00 |                                           |
| 10-269 | 10 | 113403028 | 113428811 | NONE        | gap called | 113403028 | 113428811 | 10313 | 7.28E-23 | 48 | 42 | INS   | 7.28E-23 |                                           |
| 10-272 | 10 | 113894230 | 113944586 | NONE        | gap called | 113894230 | 113944586 | 16575 | 7.28E-23 | 49 | 38 | INS   | 7.28E-23 |                                           |
| 10-284 | 10 | 116598255 | 116598255 | NONE        | gap called | 116598255 | 116598255 | 20598 | 0.00E+00 | 66 | 0  | INS   | 0.00E+00 |                                           |
| 10-290 | 10 | 117390093 | 117432823 | NONE        | gap called | 117390093 | 117432823 | 12880 | 7.28E-23 | 68 | 53 | INS   | 7.28E-23 |                                           |
| 10-291 | 10 | 117690971 | 117702944 | NONE        | gap called | 117690971 | 117702944 | 5022  | 7.28E-23 | 77 | 66 | INS   | 7.28E-23 |                                           |
| 10-293 | 10 | 117908569 | 117908569 | NONE        | gap called | 117908569 | 117908569 | 15953 | 0.00E+00 | 59 | 0  | INS   | 0.00E+00 |                                           |
| 10-295 | 10 | 118193542 | 118205014 | NONE        | gap called | 118193542 | 118205014 | 5027  | 7.28E-23 | 51 | 41 | INS   | 7.28E-23 |                                           |
| 10-300 | 10 | 120188710 | 120188710 | NONE        | gap called | 120188710 | 120188710 | 76432 | 0.00E+00 | 54 | 0  | INS   | 0.00E+00 |                                           |
| 10-305 | 10 | 127078375 | 127118159 | NONE        | gap called | 127078375 | 127118159 | 6301  | 7.28E-23 | 60 | 47 | INS   | 7.28E-23 |                                           |
| 10-308 | 10 | 127407526 | 127497548 | NONE        | gap called | 127407526 | 127497548 | 15905 | 7.28E-23 | 41 | 30 | INS   | 7.28E-23 |                                           |
| 10-314 | 10 | 135864361 | 135924666 | NONE        | gap called | 135864361 | 135924666 | 7945  | 7.28E-23 | 44 | 37 | INS   | 7.28E-23 |                                           |
| 10-319 | 10 | 137628275 | 137628275 | NONE        | gap called | 137628275 | 137628275 | 40058 | 0.00E+00 | 60 | 0  | INS   | 0.00E+00 |                                           |
| 10-322 | 10 | 142251775 | 142291948 | NONE        | gap called | 142251775 | 142291948 | 8830  | 7.28E-23 | 60 | 47 | INS   | 7.28E-23 |                                           |
| 10-328 | 10 | 149051997 | 149051997 | NONE        | gap called | 149051997 | 149051997 | 7458  | 0.00E+00 | 64 | 0  | INS   | 0.00E+00 |                                           |
| 5-378  | 5  | 140171711 | 140200217 | Misassembly | gap called | 140171711 | 140200217 | 6111  | 7.30E-23 | 49 | 35 | INS   | 7.30E-23 | complex event                             |
| 7-99   | 7  | 49411926  | 49435539  | Misassembly | gap called | 49411926  | 49435539  | 10862 | 1.08E-22 | 62 | 52 | INS   | 1.08E-22 | complex event - possible inversion        |
| 1-1    | 1  | 1933290   | 2008849   | Misassembly | NONE       | 1933290   | 2008849   | 0     |          |    |    | OTHER |          | Complex event insertion and rearrangement |
| 1-6    | 1  | 2693118   | 2825334   | Misassembly | NONE       | 2693118   | 2825334   | 0     |          |    |    | OTHER |          | Complex event                             |
| 1-10   | 1  | 5429636   | 5479603   | Misassembly | NONE       | 5429636   | 5479603   | 0     |          |    |    | OTHER |          | Complex event                             |
| 1-12   | 1  | 7312238   | 7376813   | Misassembly | NONE       | 7312238   | 7376813   | 0     |          |    |    | OTHER |          | Complex event                             |
| 1-13   | 1  | 7435795   | 7555989   | Misassembly | NONE       | 7435795   | 7555989   | 0     |          |    |    | OTHER |          | Complex event                             |
| 1-16   | 1  | 8263233   | 8426279   | Misassembly | NONE       | 8263233   | 8426279   | 0     |          |    |    | OTHER |          | possible inversion                        |
| 1-21   | 1  | 8819988   | 8853281   | Misassembly | NONE       | 8819988   | 8853281   | 0     |          |    |    | OTHER |          | Complex event                             |
| 1-23   | 1  | 9198019   | 9368760   | Misassembly | NONE       | 9198019   | 9368760   | 0     |          |    |    | OTHER |          | Insertion and complex event               |
| 1-30   | 1  | 10332683  | 10544151  | Misassembly | NONE       | 10332683  | 10544151  | 0     |          |    |    | OTHER |          | Complex event                             |
| 1-31   | 1  | 10622313  | 10767316  | Misassembly | NONE       | 10622313  | 10767316  | 0     |          |    |    | OTHER |          | Complex event                             |
| 1-33   | 1  | 11391442  | 11459014  | Misassembly | NONE       | 11391442  | 11459014  | 0     |          |    |    | OTHER |          | Complex event                             |
| 1-34   | 1  | 11715496  | 11715496  | Misassembly | NONE       | 11715496  | 11715496  | 0     |          |    |    | OTHER |          | Complex event                             |
| 1-43   | 1  | 12831282  | 13007173  | Misassembly | NONE       | 12831282  | 13007173  | 0     |          |    |    | OTHER |          | Complex event                             |
| 1-44   | 1  | 13072492  | 13287408  | Misassembly | NONE       | 13072492  | 13287408  | 0     |          |    |    | OTHER |          | Complex event                             |
| 1-47   | 1  | 13494371  | 13590640  | Misassembly | NONE       | 13494371  | 13590640  | 0     |          |    |    | OTHER |          | Complex event possible inversion          |
| 1-48   | 1  | 13653475  | 13690277  | Misassembly | NONE       | 13653475  | 13690277  | 0     |          |    |    | OTHER |          | Complex event                             |
| 1-54   | 1  | 14430908  | 14597145  | Misassembly | NONE       | 14430908  | 14597145  | 0     |          |    |    | OTHER |          | Complex event                             |
| 1-58   | 1  | 15371796  | 15548474  | Misassembly | NONE       | 15371796  | 15548474  | 0     |          |    |    | OTHER |          | Complex event                             |
| 1-62   | 1  | 16225318  | 16436580  | Misassembly | NONE       | 16225318  | 16436580  | 0     |          |    |    | OTHER |          | Complex event                             |
| 1-65   | 1  | 16791695  | 16953906  | Misassembly | NONE       | 16791695  | 16953906  | 0     |          |    |    | OTHER |          | Complex event                             |
| 1-66   | 1  | 17060199  | 17350142  | Misassembly | NONE       | 17060199  | 17350142  | 0     |          |    |    | OTHER |          | Complex event                             |
| 1-71   | 1  | 18005003  | 18067612  | Misassembly | NONE       | 18005003  | 18067612  | 0     |          |    |    | OTHER |          | Complex event                             |
| 1-72   | 1  | 18102903  | 18267922  | Misassembly | NONE       | 18102903  | 18267922  | 0     |          |    |    | OTHER |          | Complex event                             |
| 1-74   | 1  | 18584003  | 18716231  | Misassembly | NONE       | 18584003  | 18716231  | 0     |          |    |    | OTHER |          | Complex event                             |
| 1-75   | 1  | 18902381  | 19012632  | Misassembly | NONE       | 18902381  | 19012632  | 0     |          |    |    | OTHER |          | Complex event                             |
| 1-78   | 1  | 23036941  | 23132267  | Misassembly | NONE       | 23036941  | 23132267  | 0     |          |    |    | OTHER |          | Complex event possible inversion          |
| 1-79   | 1  | 23149366  | 23242592  | Misassembly | NONE       | 23149366  | 23242592  | 0     |          |    |    | OTHER |          | Complex event                             |
| 1-81   | 1  | 24486335  | 24568740  | Misassembly | NONE       | 24486335  | 24568740  | 0     |          |    |    | OTHER |          | Complex event                             |
| 1-82   | 1  | 28740973  | 28889944  | Misassembly | NONE       | 28740973  | 28889944  | 0     |          |    |    | OTHER |          | Complex event                             |
| 1-86   | 1  | 29478352  | 29534044  | Misassembly | NONE       | 29478352  | 29534044  | 0     |          |    |    | OTHER |          | Complex event                             |
| 1-88   | 1  | 31249867  | 31413432  | Misassembly | NONE       | 31249867  | 31413432  | 0     |          |    |    | OTHER |          | Complex event                             |
| 1-92   | 1  | 33992693  | 34147716  | Misassembly | NONE       | 33992693  | 34147716  | 0     |          |    |    | OTHER |          | Complex event                             |
| 1-93   | 1  | 34189304  | 34290760  | Misassembly | NONE       | 34189304  | 34290760  | 0     |          |    |    | OTHER |          | Complex event                             |
| 1-94   | 1  | 34412635  | 34703756  | Misassembly | NONE       | 34412635  | 34703756  | 0     |          |    |    | OTHER |          | Complex event                             |
| 1-95   | 1  | 34836292  | 34956014  | Misassembly | NONE       | 34836292  | 34956014  | 0     |          |    |    | OTHER |          | Complex event                             |
| 1-96   | 1  | 35114846  | 35172662  | Misassembly | NONE       | 35114846  | 35172662  | 0     |          |    |    | OTHER |          | Complex event                             |
| 1-97   | 1  | 35338500  | 35486733  | Misassembly | NONE       | 35338500  | 35486733  | 0     |          |    |    | OTHER |          | Complex event                             |
| 1-98   | 1  | 35536540  | 35639787  | Misassembly | NONE       | 35536540  | 35639787  | 0     |          |    |    | OTHER |          | Complex event                             |
| 1-101  | 1  | 36301873  | 36420071  | Misassembly | NONE       | 36301873  | 36420071  | 0     |          |    |    | OTHER |          | Complex event                             |
| 1-103  | 1  | 36561932  | 36736029  | Misassembly | NONE       | 36561932  | 36736029  | 0     |          |    |    | OTHER |          | Complex event                             |
| 1-107  | 1  | 37345881  | 37533048  | Misassembly | NONE       | 37345881  | 37533048  | 0     |          |    |    | OTHER |          | Complex event                             |
| 1-108  | 1  | 37748324  | 37867594  | Misassembly | NONE       | 37748324  | 37867594  | 0     |          |    |    | OTHER |          | Complex event                             |
| 1-109  | 1  | 37926819  | 38023473  | Misassembly | NONE       | 37926819  | 38023473  | 0     |          |    |    | OTHER |          | Complex event                             |
| 1-110  | 1  | 42350073  | 42367673  | Misassembly | NONE       | 42350073  | 42367673  | 0     |          |    |    | OTHER |          | Complex event possible inversion          |
| 1-117  | 1  | 46132660  | 46264341  | Misassembly | NONE       | 46132660  | 46264341  | 0     |          |    |    | OTHER |          | Complex event                             |
| 1-119  | 1  | 46962608  | 47032992  | Misassembly | NONE       | 46962608  | 47032992  | 0     |          |    |    | OTHER |          | Complex event                             |
| 1-132  | 1  | 54428633  | 54586585  | Misassembly | NONE       | 54428633  | 54586585  | 0     |          |    |    | OTHER |          | Complex event                             |
| 1-133  | 1  | 54743210  | 54835350  | Misassembly | NONE       | 54743210  | 54835350  | 0     |          |    |    | OTHER |          | Complex event                             |
| 1-134  | 1  | 55250919  | 55469676  | Misassembly | NONE       | 55250919  | 55469676  | 0     |          |    |    | OTHER |          | Complex event                             |
| 1-136  | 1  | 55910779  | 55999209  | Misassembly | NONE       | 55910779  | 55999209  | 0     |          |    |    | OTHER |          | Complex event                             |
| 1-137  | 1  | 56275804  | 56271059  | Misassembly | NONE       | 56275804  | 56271059  | 0     |          |    |    | OTHER |          | Complex event                             |



|       |   |           |           |             |      |           |           |   |       |                    |
|-------|---|-----------|-----------|-------------|------|-----------|-----------|---|-------|--------------------|
| 1-138 | 1 | 56327842  | 56421589  | Misassembly | NONE | 56327842  | 56421589  | 0 | OTHER | complex event      |
| 1-139 | 1 | 56620487  | 56825015  | Misassembly | NONE | 56620487  | 56825015  | 0 | OTHER | complex event      |
| 1-147 | 1 | 57734742  | 57829183  | Misassembly | NONE | 57734742  | 57829183  | 0 | OTHER | complex event      |
| 1-151 | 1 | 58348655  | 58366936  | Misassembly | NONE | 58348655  | 58366936  | 0 | OTHER | complex event      |
| 1-154 | 1 | 58560929  | 58810816  | Misassembly | NONE | 58560929  | 58810816  | 0 | OTHER | possible inversion |
| 1-155 | 1 | 59154850  | 59315548  | Misassembly | NONE | 59154850  | 59315548  | 0 | OTHER | complex event      |
| 1-160 | 1 | 60026034  | 60113111  | Misassembly | NONE | 60026034  | 60113111  | 0 | OTHER | complex event      |
| 1-161 | 1 | 60389185  | 60612187  | Misassembly | NONE | 60389185  | 60612187  | 0 | OTHER | complex event      |
| 1-162 | 1 | 60654784  | 60991408  | Misassembly | NONE | 60654784  | 60991408  | 0 | OTHER | complex event      |
| 1-163 | 1 | 61071278  | 61107362  | Misassembly | NONE | 61071278  | 61107362  | 0 | OTHER | complex event      |
| 1-164 | 1 | 61224064  | 61340567  | Misassembly | NONE | 61224064  | 61340567  | 0 | OTHER | complex event      |
| 1-172 | 1 | 62554868  | 63027265  | Misassembly | NONE | 62554868  | 63027265  | 0 | OTHER | complex event      |
| 1-173 | 1 | 63176314  | 63395314  | Misassembly | NONE | 63176314  | 63395314  | 0 | OTHER | complex event      |
| 1-180 | 1 | 64354710  | 64484292  | Misassembly | NONE | 64354710  | 64484292  | 0 | OTHER | complex event      |
| 1-182 | 1 | 65916462  | 65989745  | Misassembly | NONE | 65916462  | 65989745  | 0 | OTHER | complex event      |
| 1-184 | 1 | 66277144  | 66328752  | Misassembly | NONE | 66277144  | 66328752  | 0 | OTHER | complex event      |
| 1-187 | 1 | 69011478  | 69091823  | Misassembly | NONE | 69011478  | 69091823  | 0 | OTHER | possible inversion |
| 1-188 | 1 | 69240334  | 69311359  | Misassembly | NONE | 69240334  | 69311359  | 0 | OTHER | complex event      |
| 1-189 | 1 | 69721950  | 69861541  | Misassembly | NONE | 69721950  | 69861541  | 0 | OTHER | complex event      |
| 1-190 | 1 | 70038055  | 70099736  | Misassembly | NONE | 70038055  | 70099736  | 0 | OTHER | complex event      |
| 1-191 | 1 | 71505542  | 71612977  | Misassembly | NONE | 71505542  | 71612977  | 0 | OTHER | complex event      |
| 1-193 | 1 | 72196524  | 72279713  | Misassembly | NONE | 72196524  | 72279713  | 0 | OTHER | complex event      |
| 1-195 | 1 | 72367517  | 72423703  | Misassembly | NONE | 72367517  | 72423703  | 0 | OTHER | possible inversion |
| 1-196 | 1 | 72826227  | 72931300  | Misassembly | NONE | 72826227  | 72931300  | 0 | OTHER | complex event      |
| 1-197 | 1 | 72994209  | 73027678  | Misassembly | NONE | 72994209  | 73027678  | 0 | OTHER | complex event      |
| 1-198 | 1 | 73166303  | 73457298  | Misassembly | NONE | 73166303  | 73457298  | 0 | OTHER | complex event      |
| 1-199 | 1 | 73540012  | 73766212  | Misassembly | NONE | 73540012  | 73766212  | 0 | OTHER | complex event      |
| 1-200 | 1 | 74057928  | 74109471  | Misassembly | NONE | 74057928  | 74109471  | 0 | OTHER | complex event      |
| 1-202 | 1 | 74388679  | 74531640  | Misassembly | NONE | 74388679  | 74531640  | 0 | OTHER | complex event      |
| 1-203 | 1 | 74599439  | 74656137  | Misassembly | NONE | 74599439  | 74656137  | 0 | OTHER | complex event      |
| 1-206 | 1 | 74965341  | 75001976  | Misassembly | NONE | 74965341  | 75001976  | 0 | OTHER | possible inversion |
| 1-208 | 1 | 75267032  | 75402679  | Misassembly | NONE | 75267032  | 75402679  | 0 | OTHER | complex event      |
| 1-209 | 1 | 75427796  | 75533898  | Misassembly | NONE | 75427796  | 75533898  | 0 | OTHER | complex event      |
| 1-212 | 1 | 76033279  | 76214258  | Misassembly | NONE | 76033279  | 76214258  | 0 | OTHER | complex event      |
| 1-219 | 1 | 79792930  | 79810016  | Misassembly | NONE | 79792930  | 79810016  | 0 | OTHER | complex event      |
| 1-220 | 1 | 79979584  | 80204215  | Misassembly | NONE | 79979584  | 80204215  | 0 | OTHER | complex event      |
| 1-221 | 1 | 80355939  | 80394928  | Misassembly | NONE | 80355939  | 80394928  | 0 | OTHER | complex event      |
| 1-223 | 1 | 80587669  | 80662296  | Misassembly | NONE | 80587669  | 80662296  | 0 | OTHER | complex event      |
| 1-226 | 1 | 80991993  | 81147108  | Misassembly | NONE | 80991993  | 81147108  | 0 | OTHER | complex event      |
| 1-227 | 1 | 81408384  | 81468850  | Misassembly | NONE | 81408384  | 81468850  | 0 | OTHER | complex event      |
| 1-228 | 1 | 81641589  | 81791158  | Misassembly | NONE | 81641589  | 81791158  | 0 | OTHER | complex event      |
| 1-229 | 1 | 81828553  | 82110933  | Misassembly | NONE | 81828553  | 82110933  | 0 | OTHER | complex event      |
| 1-231 | 1 | 82436384  | 82567732  | Misassembly | NONE | 82436384  | 82567732  | 0 | OTHER | complex event      |
| 1-232 | 1 | 82654471  | 82951281  | Misassembly | NONE | 82654471  | 82951281  | 0 | OTHER | complex event      |
| 1-235 | 1 | 84208966  | 84338152  | Misassembly | NONE | 84208966  | 84338152  | 0 | OTHER | complex event      |
| 1-236 | 1 | 84424615  | 84452503  | Misassembly | NONE | 84424615  | 84452503  | 0 | OTHER | complex event      |
| 1-237 | 1 | 84576767  | 84689129  | Misassembly | NONE | 84576767  | 84689129  | 0 | OTHER | complex event      |
| 1-240 | 1 | 85778389  | 85873451  | Misassembly | NONE | 85778389  | 85873451  | 0 | OTHER | complex event      |
| 1-241 | 1 | 87593507  | 87702146  | Misassembly | NONE | 87593507  | 87702146  | 0 | OTHER | complex event      |
| 1-249 | 1 | 88857201  | 88935155  | Misassembly | NONE | 88857201  | 88935155  | 0 | OTHER | complex event      |
| 1-250 | 1 | 88963998  | 89062571  | Misassembly | NONE | 88963998  | 89062571  | 0 | OTHER | complex event      |
| 1-253 | 1 | 89312497  | 89383994  | Misassembly | NONE | 89312497  | 89383994  | 0 | OTHER | complex event      |
| 1-258 | 1 | 90759036  | 91079531  | Misassembly | NONE | 90759036  | 91079531  | 0 | OTHER | complex event      |
| 1-259 | 1 | 91141354  | 91198763  | Misassembly | NONE | 91141354  | 91198763  | 0 | OTHER | complex event      |
| 1-260 | 1 | 91518315  | 91750254  | Misassembly | NONE | 91518315  | 91750254  | 0 | OTHER | complex event      |
| 1-261 | 1 | 91803534  | 91907777  | Misassembly | NONE | 91803534  | 91907777  | 0 | OTHER | complex event      |
| 1-262 | 1 | 91991312  | 92288561  | Misassembly | NONE | 91991312  | 92288561  | 0 | OTHER | complex event      |
| 1-263 | 1 | 92316256  | 92543818  | Misassembly | NONE | 92316256  | 92543818  | 0 | OTHER | complex event      |
| 1-264 | 1 | 92703188  | 92718690  | Misassembly | NONE | 92703188  | 92718690  | 0 | OTHER | complex event      |
| 1-266 | 1 | 92953876  | 93090404  | Misassembly | NONE | 92953876  | 93090404  | 0 | OTHER | complex event      |
| 1-270 | 1 | 94026590  | 94135349  | Misassembly | NONE | 94026590  | 94135349  | 0 | OTHER | complex event      |
| 1-271 | 1 | 95301341  | 95406092  | Misassembly | NONE | 95301341  | 95406092  | 0 | OTHER | complex event      |
| 1-277 | 1 | 96398217  | 96547165  | Misassembly | NONE | 96398217  | 96547165  | 0 | OTHER | complex event      |
| 1-278 | 1 | 98105045  | 98352424  | Misassembly | NONE | 98105045  | 98352424  | 0 | OTHER | complex event      |
| 1-279 | 1 | 98515689  | 98557112  | Misassembly | NONE | 98515689  | 98557112  | 0 | OTHER | complex event      |
| 1-280 | 1 | 99416692  | 99656255  | Misassembly | NONE | 99416692  | 99656255  | 0 | OTHER | complex event      |
| 1-281 | 1 | 99858342  | 99936676  | Misassembly | NONE | 99858342  | 99936676  | 0 | OTHER | complex event      |
| 1-282 | 1 | 100265870 | 100357510 | Misassembly | NONE | 100265870 | 100357510 | 0 | OTHER | complex event      |
| 1-286 | 1 | 100735770 | 100837212 | Misassembly | NONE | 100735770 | 100837212 | 0 | OTHER | complex event      |
| 1-287 | 1 | 101025050 | 101162167 | Misassembly | NONE | 101025050 | 101162167 | 0 | OTHER | complex event      |
| 1-289 | 1 | 101936749 | 102088892 | Misassembly | NONE | 101936749 | 102088892 | 0 | OTHER | complex event      |
| 1-293 | 1 | 102545985 | 102650126 | Misassembly | NONE | 102545985 | 102650126 | 0 | OTHER | complex event      |
| 1-300 | 1 | 103990324 | 104118585 | Misassembly | NONE | 103990324 | 104118585 | 0 | OTHER | complex event      |
| 1-301 | 1 | 104174677 | 104193787 | Misassembly | NONE | 104174677 | 104193787 | 0 | OTHER | complex event      |
| 1-312 | 1 | 105614983 | 105727653 | Misassembly | NONE | 105614983 | 105727653 | 0 | OTHER | complex event      |
| 1-314 | 1 | 105800730 | 105897654 | Misassembly | NONE | 105800730 | 105897654 | 0 | OTHER | complex event      |
| 1-315 | 1 | 106048381 | 106103251 | Misassembly | NONE | 106048381 | 106103251 | 0 | OTHER | complex event      |
| 1-319 | 1 | 108172662 | 108275685 | Misassembly | NONE | 108172662 | 108275685 | 0 | OTHER | complex event      |
| 1-321 | 1 | 108442659 | 108502327 | Misassembly | NONE | 108442659 | 108502327 | 0 | OTHER | complex event      |
| 1-322 | 1 | 108710058 | 108726676 | Misassembly | NONE | 108710058 | 108726676 | 0 | OTHER | complex event      |
| 1-323 | 1 | 109199614 | 109305823 | Misassembly | NONE | 109199614 | 109305823 | 0 | OTHER | complex event      |
| 1-325 | 1 | 109773646 | 109932625 | Misassembly | NONE | 109773646 | 109932625 | 0 | OTHER | complex event      |
| 1-330 | 1 | 110429330 | 110559940 | Misassembly | NONE | 110429330 | 110559940 | 0 | OTHER | complex event      |

|       |   |           |           |              |      |           |           |   |       |                    |
|-------|---|-----------|-----------|--------------|------|-----------|-----------|---|-------|--------------------|
| 1-335 | 1 | 111444806 | 111540140 | Misassembley | NONE | 111444806 | 111540140 | 0 | OTHER | complex event      |
| 1-341 | 1 | 112325908 | 112410332 | Misassembley | NONE | 112325908 | 112410332 | 0 | OTHER | complex event      |
| 1-346 | 1 | 112971035 | 113141522 | Misassembley | NONE | 112971035 | 113141522 | 0 | OTHER | complex event      |
| 1-348 | 1 | 113564661 | 113614043 | Misassembley | NONE | 113564661 | 113614043 | 0 | OTHER | complex event      |
| 1-349 | 1 | 113805855 | 113933627 | Misassembley | NONE | 113805855 | 113933627 | 0 | OTHER | complex event      |
| 1-352 | 1 | 114671347 | 114798369 | Misassembley | NONE | 114671347 | 114798369 | 0 | OTHER | complex event      |
| 1-354 | 1 | 115000794 | 115117452 | Misassembley | NONE | 115000794 | 115117452 | 0 | OTHER | complex event      |
| 1-356 | 1 | 117051116 | 117196918 | Misassembley | NONE | 117051116 | 117196918 | 0 | OTHER | complex event      |
| 1-357 | 1 | 117534019 | 117710708 | Misassembley | NONE | 117534019 | 117710708 | 0 | OTHER | complex event      |
| 1-361 | 1 | 118407473 | 118513164 | Misassembley | NONE | 118407473 | 118513164 | 0 | OTHER | complex event      |
| 1-362 | 1 | 118838021 | 118896763 | Misassembley | NONE | 118838021 | 118896763 | 0 | OTHER | complex event      |
| 1-364 | 1 | 119004682 | 119061334 | Misassembley | NONE | 119004682 | 119061334 | 0 | OTHER | complex event      |
| 1-368 | 1 | 120142236 | 120219337 | Misassembley | NONE | 120142236 | 120219337 | 0 | OTHER | complex event      |
| 1-369 | 1 | 120311824 | 120536033 | Misassembley | NONE | 120311824 | 120536033 | 0 | OTHER | complex event      |
| 1-370 | 1 | 120846842 | 121100839 | Misassembley | NONE | 120846842 | 121100839 | 0 | OTHER | complex event      |
| 1-373 | 1 | 121684962 | 121838077 | Misassembley | NONE | 121684962 | 121838077 | 0 | OTHER | complex event      |
| 1-374 | 1 | 122198403 | 122331538 | Misassembley | NONE | 122198403 | 122331538 | 0 | OTHER | complex event      |
| 1-375 | 1 | 122534416 | 122599017 | Misassembley | NONE | 122534416 | 122599017 | 0 | OTHER | complex event      |
| 1-376 | 1 | 122808172 | 122906183 | Misassembley | NONE | 122808172 | 122906183 | 0 | OTHER | complex event      |
| 1-377 | 1 | 123069184 | 123251623 | Misassembley | NONE | 123069184 | 123251623 | 0 | OTHER | complex event      |
| 1-378 | 1 | 123490715 | 123834043 | Misassembley | NONE | 123490715 | 123834043 | 0 | OTHER | complex event      |
| 1-380 | 1 | 123995718 | 124070758 | Misassembley | NONE | 123995718 | 124070758 | 0 | OTHER | complex event      |
| 1-382 | 1 | 124470505 | 124554078 | Misassembley | NONE | 124470505 | 124554078 | 0 | OTHER | complex event      |
| 1-383 | 1 | 124955551 | 125063686 | Misassembley | NONE | 124955551 | 125063686 | 0 | OTHER | complex event      |
| 1-384 | 1 | 125409930 | 125515063 | Misassembley | NONE | 125409930 | 125515063 | 0 | OTHER | complex event      |
| 1-385 | 1 | 125947562 | 126067323 | Misassembley | NONE | 125947562 | 126067323 | 0 | OTHER | with insertion     |
| 1-386 | 1 | 126355406 | 126414814 | Misassembley | NONE | 126355406 | 126414814 | 0 | OTHER | complex event      |
| 1-387 | 1 | 126496919 | 126603904 | Misassembley | NONE | 126496919 | 126603904 | 0 | OTHER | complex event      |
| 1-393 | 1 | 127432905 | 127625432 | Misassembley | NONE | 127432905 | 127625432 | 0 | OTHER | complex event      |
| 1-394 | 1 | 127704626 | 127790026 | Misassembley | NONE | 127704626 | 127790026 | 0 | OTHER | with insertion     |
| 1-395 | 1 | 128349528 | 128690639 | Misassembley | NONE | 128349528 | 128690639 | 0 | OTHER | complex event      |
| 1-396 | 1 | 128959198 | 129155825 | Misassembley | NONE | 128959198 | 129155825 | 0 | OTHER | complex event      |
| 1-398 | 1 | 129905763 | 129995956 | Misassembley | NONE | 129905763 | 129995956 | 0 | OTHER | complex event      |
| 1-401 | 1 | 130671191 | 130927190 | Misassembley | NONE | 130671191 | 130927190 | 0 | OTHER | complex event      |
| 1-402 | 1 | 130972349 | 131041644 | Misassembley | NONE | 130972349 | 131041644 | 0 | OTHER | complex event      |
| 1-406 | 1 | 134215577 | 134400044 | Misassembley | NONE | 134215577 | 134400044 | 0 | OTHER | complex event      |
| 1-407 | 1 | 134703627 | 135105161 | Misassembley | NONE | 134703627 | 135105161 | 0 | OTHER | complex event      |
| 1-408 | 1 | 135185406 | 135270503 | Misassembley | NONE | 135185406 | 135270503 | 0 | OTHER | possible inversion |
| 1-411 | 1 | 135568026 | 135688759 | Misassembley | NONE | 135568026 | 135688759 | 0 | OTHER | complex event      |
| 1-414 | 1 | 137819007 | 137871764 | Misassembley | NONE | 137819007 | 137871764 | 0 | OTHER | complex event      |
| 1-416 | 1 | 139963805 | 140194573 | Misassembley | NONE | 139963805 | 140194573 | 0 | OTHER | complex event      |
| 1-417 | 1 | 140245278 | 140337381 | Misassembley | NONE | 140245278 | 140337381 | 0 | OTHER | complex event      |
| 1-422 | 1 | 141268622 | 141437306 | Misassembley | NONE | 141268622 | 141437306 | 0 | OTHER | complex event      |
| 1-430 | 1 | 143630812 | 143704868 | Misassembley | NONE | 143630812 | 143704868 | 0 | OTHER | complex event      |
| 1-432 | 1 | 143821533 | 144050456 | Misassembley | NONE | 143821533 | 144050456 | 0 | OTHER | complex event      |
| 1-433 | 1 | 144314516 | 144427835 | Misassembley | NONE | 144314516 | 144427835 | 0 | OTHER | complex event      |
| 1-436 | 1 | 145019076 | 145166074 | Misassembley | NONE | 145019076 | 145166074 | 0 | OTHER | complex event      |
| 1-438 | 1 | 145617469 | 145753032 | Misassembley | NONE | 145617469 | 145753032 | 0 | OTHER | complex event      |
| 1-439 | 1 | 145829732 | 145945163 | Misassembley | NONE | 145829732 | 145945163 | 0 | OTHER | complex event      |
| 1-440 | 1 | 146329488 | 146431111 | Misassembley | NONE | 146329488 | 146431111 | 0 | OTHER | complex event      |
| 1-444 | 1 | 149905606 | 149938835 | Misassembley | NONE | 149905606 | 149938835 | 0 | OTHER | complex event      |
| 1-445 | 1 | 153147590 | 153209501 | Misassembley | NONE | 153147590 | 153209501 | 0 | OTHER | complex event      |
| 1-446 | 1 | 153528908 | 153572953 | Misassembley | NONE | 153528908 | 153572953 | 0 | OTHER | complex event      |
| 1-450 | 1 | 154234067 | 154326571 | Misassembley | NONE | 154234067 | 154326571 | 0 | OTHER | complex event      |
| 1-453 | 1 | 154531256 | 154726330 | Misassembley | NONE | 154531256 | 154726330 | 0 | OTHER | complex event      |
| 1-454 | 1 | 154886776 | 155128719 | Misassembley | NONE | 154886776 | 155128719 | 0 | OTHER | complex event      |
| 1-455 | 1 | 155348285 | 155501976 | Misassembley | NONE | 155348285 | 155501976 | 0 | OTHER | with deletion      |
| 1-457 | 1 | 156148609 | 156209871 | Misassembley | NONE | 156148609 | 156209871 | 0 | OTHER | complex event      |
| 1-460 | 1 | 156835411 | 156897179 | Misassembley | NONE | 156835411 | 156897179 | 0 | OTHER | complex event      |
| 1-461 | 1 | 157339707 | 157390126 | Misassembley | NONE | 157339707 | 157390126 | 0 | OTHER | complex event      |
| 1-463 | 1 | 157728114 | 157806099 | Misassembley | NONE | 157728114 | 157806099 | 0 | OTHER | complex event      |
| 1-465 | 1 | 157966262 | 158041475 | Misassembley | NONE | 157966262 | 158041475 | 0 | OTHER | complex event      |
| 1-467 | 1 | 158461827 | 158666265 | Misassembley | NONE | 158461827 | 158666265 | 0 | OTHER | complex event      |
| 1-468 | 1 | 158759602 | 158794705 | Misassembley | NONE | 158759602 | 158794705 | 0 | OTHER | possible inversion |
| 1-471 | 1 | 159726180 | 159778567 | Misassembley | NONE | 159726180 | 159778567 | 0 | OTHER | complex event      |
| 1-475 | 1 | 160166630 | 160296689 | Misassembley | NONE | 160166630 | 160296689 | 0 | OTHER | complex event      |
| 1-476 | 1 | 160325148 | 160535909 | Misassembley | NONE | 160325148 | 160535909 | 0 | OTHER | complex event      |
| 1-477 | 1 | 160849240 | 160904810 | Misassembley | NONE | 160849240 | 160904810 | 0 | OTHER | complex event      |
| 1-478 | 1 | 160961489 | 161048450 | Misassembley | NONE | 160961489 | 161048450 | 0 | OTHER | complex event      |
| 1-481 | 1 | 161330274 | 161491607 | Misassembley | NONE | 161330274 | 161491607 | 0 | OTHER | with insertion     |
| 1-485 | 1 | 162967012 | 163016420 | Misassembley | NONE | 162967012 | 163016420 | 0 | OTHER | with deletion      |
| 1-488 | 1 | 163371112 | 163520854 | Misassembley | NONE | 163371112 | 163520854 | 0 | OTHER | complex event      |
| 1-491 | 1 | 163960432 | 164134625 | Misassembley | NONE | 163960432 | 164134625 | 0 | OTHER | complex event      |
| 1-493 | 1 | 164301217 | 164588997 | Misassembley | NONE | 164301217 | 164588997 | 0 | OTHER | complex event      |
| 1-495 | 1 | 164957546 | 164994483 | Misassembley | NONE | 164957546 | 164994483 | 0 | OTHER | complex event      |
| 1-496 | 1 | 165288153 | 165314573 | Misassembley | NONE | 165288153 | 165314573 | 0 | OTHER | complex event      |
| 1-497 | 1 | 165575867 | 165760750 | Misassembley | NONE | 165575867 | 165760750 | 0 | OTHER | complex event      |
| 1-501 | 1 | 166155002 | 166349870 | Misassembley | NONE | 166155002 | 166349870 | 0 | OTHER | complex event      |
| 1-502 | 1 | 166451747 | 166566498 | Misassembley | NONE | 166451747 | 166566498 | 0 | OTHER | complex event      |
| 1-504 | 1 | 166796102 | 166864156 | Misassembley | NONE | 166796102 | 166864156 | 0 | OTHER | complex event      |
| 1-506 | 1 | 167206272 | 167470017 | Misassembley | NONE | 167206272 | 167470017 | 0 | OTHER | complex event      |
| 1-507 | 1 | 167595235 | 167812398 | Misassembley | NONE | 167595235 | 167812398 | 0 | OTHER | complex event      |

|       |   |           |           |               |      |           |           |   |       |                |
|-------|---|-----------|-----------|---------------|------|-----------|-----------|---|-------|----------------|
| 1-508 | 1 | 168020022 | 168113791 | Misasassembly | NONE | 168020022 | 168113791 | 0 | OTHER | complex event  |
| 1-510 | 1 | 168713351 | 168857990 | Misasassembly | NONE | 168713351 | 168857990 | 0 | OTHER | complex event  |
| 1-512 | 1 | 169338269 | 169535340 | Misasassembly | NONE | 169338269 | 169535340 | 0 | OTHER | with insertion |
| 1-514 | 1 | 169995439 | 170072895 | Misasassembly | NONE | 169995439 | 170072895 | 0 | OTHER | complex event  |
| 1-515 | 1 | 170478839 | 170945824 | Misasassembly | NONE | 170478839 | 170945824 | 0 | OTHER | complex event  |
| 1-518 | 1 | 171645811 | 171769633 | Misasassembly | NONE | 171645811 | 171769633 | 0 | OTHER | complex event  |
| 1-519 | 1 | 171824196 | 171862122 | Misasassembly | NONE | 171824196 | 171862122 | 0 | OTHER | complex event  |
| 1-520 | 1 | 172092860 | 172192805 | Misasassembly | NONE | 172092860 | 172192805 | 0 | OTHER | complex event  |
| 1-523 | 1 | 172561350 | 172730984 | Misasassembly | NONE | 172561350 | 172730984 | 0 | OTHER | complex event  |
| 1-525 | 1 | 173137784 | 173290833 | Misasassembly | NONE | 173137784 | 173290833 | 0 | OTHER | complex event  |
| 1-526 | 1 | 173349613 | 173587810 | Misasassembly | NONE | 173349613 | 173587810 | 0 | OTHER | complex event  |
| 1-527 | 1 | 173726605 | 173844280 | Misasassembly | NONE | 173726605 | 173844280 | 0 | OTHER | complex event  |
| 1-529 | 1 | 174183106 | 174225678 | Misasassembly | NONE | 174183106 | 174225678 | 0 | OTHER | complex event  |
| 1-530 | 1 | 174460723 | 174497770 | Misasassembly | NONE | 174460723 | 174497770 | 0 | OTHER | complex event  |
| 1-534 | 1 | 174953681 | 175061226 | Misasassembly | NONE | 174953681 | 175061226 | 0 | OTHER | complex event  |
| 1-536 | 1 | 176711080 | 176974755 | Misasassembly | NONE | 176711080 | 176974755 | 0 | OTHER | complex event  |
| 1-537 | 1 | 177008991 | 177095802 | Misasassembly | NONE | 177008991 | 177095802 | 0 | OTHER | complex event  |
| 1-539 | 1 | 178594928 | 178768342 | Misasassembly | NONE | 178594928 | 178768342 | 0 | OTHER | complex event  |
| 1-541 | 1 | 180187017 | 180302704 | Misasassembly | NONE | 180187017 | 180302704 | 0 | OTHER | complex event  |
| 1-542 | 1 | 180338959 | 180606195 | Misasassembly | NONE | 180338959 | 180606195 | 0 | OTHER | complex event  |
| 1-545 | 1 | 183046269 | 183119158 | Misasassembly | NONE | 183046269 | 183119158 | 0 | OTHER | complex event  |
| 1-546 | 1 | 183167280 | 183274083 | Misasassembly | NONE | 183167280 | 183274083 | 0 | OTHER | complex event  |
| 1-552 | 1 | 184417311 | 184508850 | Misasassembly | NONE | 184417311 | 184508850 | 0 | OTHER | complex event  |
| 1-553 | 1 | 184562720 | 184710610 | Misasassembly | NONE | 184562720 | 184710610 | 0 | OTHER | complex event  |
| 1-554 | 1 | 184934206 | 185036646 | Misasassembly | NONE | 184934206 | 185036646 | 0 | OTHER | complex event  |
| 1-555 | 1 | 185107191 | 185343365 | Misasassembly | NONE | 185107191 | 185343365 | 0 | OTHER | complex event  |
| 1-557 | 1 | 186107347 | 186234171 | Misasassembly | NONE | 186107347 | 186234171 | 0 | OTHER | complex event  |
| 1-558 | 1 | 186521057 | 186607601 | Misasassembly | NONE | 186521057 | 186607601 | 0 | OTHER | complex event  |
| 1-559 | 1 | 186737312 | 186854959 | Misasassembly | NONE | 186737312 | 186854959 | 0 | OTHER | complex event  |
| 1-561 | 1 | 189915113 | 189980104 | Misasassembly | NONE | 189915113 | 189980104 | 0 | OTHER | complex event  |
| 1-562 | 1 | 191434344 | 191674845 | Misasassembly | NONE | 191434344 | 191674845 | 0 | OTHER | complex event  |
| 1-563 | 1 | 191779303 | 191995116 | Misasassembly | NONE | 191779303 | 191995116 | 0 | OTHER | complex event  |
| 1-567 | 1 | 192661574 | 193093381 | Misasassembly | NONE | 192661574 | 193093381 | 0 | OTHER | complex event  |
| 1-568 | 1 | 193150341 | 193168373 | Misasassembly | NONE | 193150341 | 193168373 | 0 | OTHER | complex event  |
| 1-570 | 1 | 193991000 | 194165703 | Misasassembly | NONE | 193991000 | 194165703 | 0 | OTHER | complex event  |
| 1-572 | 1 | 194306798 | 194445268 | Misasassembly | NONE | 194306798 | 194445268 | 0 | OTHER | complex event  |
| 1-573 | 1 | 194513237 | 194604784 | Misasassembly | NONE | 194513237 | 194604784 | 0 | OTHER | complex event  |
| 1-574 | 1 | 194761059 | 194900019 | Misasassembly | NONE | 194761059 | 194900019 | 0 | OTHER | complex event  |
| 1-576 | 1 | 195001594 | 195189685 | Misasassembly | NONE | 195001594 | 195189685 | 0 | OTHER | complex event  |
| 1-578 | 1 | 195335115 | 195402600 | Misasassembly | NONE | 195335115 | 195402600 | 0 | OTHER | complex event  |
| 1-579 | 1 | 195685569 | 195743319 | Misasassembly | NONE | 195685569 | 195743319 | 0 | OTHER | complex event  |
| 1-581 | 1 | 196115766 | 196256092 | Misasassembly | NONE | 196115766 | 196256092 | 0 | OTHER | complex event  |
| 1-582 | 1 | 196336267 | 196397108 | Misasassembly | NONE | 196336267 | 196397108 | 0 | OTHER | complex event  |
| 1-584 | 1 | 196838299 | 196955486 | Misasassembly | NONE | 196838299 | 196955486 | 0 | OTHER | complex event  |
| 1-585 | 1 | 197014362 | 197119812 | Misasassembly | NONE | 197014362 | 197119812 | 0 | OTHER | complex event  |
| 1-589 | 1 | 197470717 | 197553377 | Misasassembly | NONE | 197470717 | 197553377 | 0 | OTHER | complex event  |
| 1-591 | 1 | 197822645 | 197965703 | Misasassembly | NONE | 197822645 | 197965703 | 0 | OTHER | complex event  |
| 1-594 | 1 | 198861310 | 198988618 | Misasassembly | NONE | 198861310 | 198988618 | 0 | OTHER | complex event  |
| 1-595 | 1 | 199014608 | 199073517 | Misasassembly | NONE | 199014608 | 199073517 | 0 | OTHER | complex event  |
| 1-596 | 1 | 199550971 | 199605316 | Misasassembly | NONE | 199550971 | 199605316 | 0 | OTHER | complex event  |
| 1-600 | 1 | 205141769 | 205218808 | Misasassembly | NONE | 205141769 | 205218808 | 0 | OTHER | with deletion  |
| 1-602 | 1 | 205413663 | 205437859 | Misasassembly | NONE | 205413663 | 205437859 | 0 | OTHER | complex event  |
| 1-607 | 1 | 206303377 | 206418762 | Misasassembly | NONE | 206303377 | 206418762 | 0 | OTHER | complex event  |
| 1-610 | 1 | 207036087 | 207220886 | Misasassembly | NONE | 207036087 | 207220886 | 0 | OTHER | complex event  |
| 1-614 | 1 | 207951151 | 208073489 | Misasassembly | NONE | 207951151 | 208073489 | 0 | OTHER | complex event  |
| 1-615 | 1 | 208130551 | 208433276 | Misasassembly | NONE | 208130551 | 208433276 | 0 | OTHER | complex event  |
| 1-616 | 1 | 208567461 | 208801652 | Misasassembly | NONE | 208567461 | 208801652 | 0 | OTHER | complex event  |
| 1-617 | 1 | 208959893 | 209111495 | Misasassembly | NONE | 208959893 | 209111495 | 0 | OTHER | complex event  |
| 1-619 | 1 | 209652680 | 209755770 | Misasassembly | NONE | 209652680 | 209755770 | 0 | OTHER | complex event  |
| 1-620 | 1 | 210155461 | 210255961 | Misasassembly | NONE | 210155461 | 210255961 | 0 | OTHER | complex event  |
| 1-621 | 1 | 210403092 | 210812092 | Misasassembly | NONE | 210403092 | 210812092 | 0 | OTHER | complex event  |
| 1-622 | 1 | 211074885 | 211135800 | Misasassembly | NONE | 211074885 | 211135800 | 0 | OTHER | complex event  |
| 1-623 | 1 | 211188308 | 211248240 | Misasassembly | NONE | 211188308 | 211248240 | 0 | OTHER | complex event  |
| 1-627 | 1 | 211488626 | 211538515 | Misasassembly | NONE | 211488626 | 211538515 | 0 | OTHER | complex event  |
| 1-628 | 1 | 211646388 | 211685969 | Misasassembly | NONE | 211646388 | 211685969 | 0 | OTHER | complex event  |
| 1-629 | 1 | 211734079 | 211786623 | Misasassembly | NONE | 211734079 | 211786623 | 0 | OTHER | complex event  |
| 1-630 | 1 | 211951295 | 212152843 | Misasassembly | NONE | 211951295 | 212152843 | 0 | OTHER | complex event  |
| 1-631 | 1 | 212211440 | 212355818 | Misasassembly | NONE | 212211440 | 212355818 | 0 | OTHER | complex event  |
| 1-632 | 1 | 212432160 | 212620435 | Misasassembly | NONE | 212432160 | 212620435 | 0 | OTHER | complex event  |
| 1-633 | 1 | 212696778 | 212935888 | Misasassembly | NONE | 212696778 | 212935888 | 0 | OTHER | complex event  |
| 1-636 | 1 | 213134627 | 213467241 | Misasassembly | NONE | 213134627 | 213467241 | 0 | OTHER | complex event  |
| 1-637 | 1 | 213841987 | 213989373 | Misasassembly | NONE | 213841987 | 213989373 | 0 | OTHER | complex event  |
| 1-638 | 1 | 214359265 | 214772719 | Misasassembly | NONE | 214359265 | 214772719 | 0 | OTHER | complex event  |
| 1-639 | 1 | 214875035 | 214953276 | Misasassembly | NONE | 214875035 | 214953276 | 0 | OTHER | complex event  |
| 1-640 | 1 | 215363927 | 215483431 | Misasassembly | NONE | 215363927 | 215483431 | 0 | OTHER | complex event  |
| 1-641 | 1 | 215689170 | 215882470 | Misasassembly | NONE | 215689170 | 215882470 | 0 | OTHER | complex event  |
| 1-642 | 1 | 216259399 | 216331867 | Misasassembly | NONE | 216259399 | 216331867 | 0 | OTHER | complex event  |
| 1-643 | 1 | 216721653 | 216913342 | Misasassembly | NONE | 216721653 | 216913342 | 0 | OTHER | complex event  |
| 1-646 | 1 | 217376898 | 217637126 | Misasassembly | NONE | 217376898 | 217637126 | 0 | OTHER | complex event  |
| 1-647 | 1 | 217853128 | 218135161 | Misasassembly | NONE | 217853128 | 218135161 | 0 | OTHER | complex event  |
| 1-648 | 1 | 218217319 | 218423476 | Misasassembly | NONE | 218217319 | 218423476 | 0 | OTHER | complex event  |
| 1-649 | 1 | 218754281 | 218873670 | Misasassembly | NONE | 218754281 | 218873670 | 0 | OTHER | complex event  |
| 1-650 | 1 | 219200794 | 219259114 | Misasassembly | NONE | 219200794 | 219259114 | 0 | OTHER | complex event  |
| 1-653 | 1 | 220076536 | 220181337 | Misasassembly | NONE | 220076536 | 220181337 | 0 | OTHER | complex event  |
| 1-659 | 1 | 221974150 | 222078363 | Misasassembly | NONE | 221974150 | 222078363 | 0 | OTHER | complex event  |
| 1-663 | 1 | 224261761 | 224502476 | Misasassembly | NONE | 224261761 | 224502476 | 0 | OTHER | complex event  |
| 1-664 | 1 | 224536072 | 224605858 | Misasassembly | NONE | 224536072 | 224605858 | 0 | OTHER | complex event  |
| 1-666 | 1 | 224827677 | 224877988 | Misasassembly | NONE | 224827677 | 224877988 | 0 | OTHER | complex event  |
| 1-667 | 1 | 225065876 | 225616886 | Misasassembly | NONE | 225065876 | 225616886 | 0 | OTHER | complex event  |

|       |   |           |           |             |      |           |           |   |       |                |
|-------|---|-----------|-----------|-------------|------|-----------|-----------|---|-------|----------------|
| 1-668 | 1 | 225727721 | 225820970 | Misassembly | NONE | 225727721 | 225820970 | 0 | OTHER | complex event  |
| 1-669 | 1 | 226043424 | 226176777 | Misassembly | NONE | 226043424 | 226176777 | 0 | OTHER | complex event  |
| 1-671 | 1 | 226350563 | 226499943 | Misassembly | NONE | 226350563 | 226499943 | 0 | OTHER | with insertion |
| 1-672 | 1 | 226617778 | 226782542 | Misassembly | NONE | 226617778 | 226782542 | 0 | OTHER | complex event  |
| 1-677 | 1 | 227772594 | 228030085 | Misassembly | NONE | 227772594 | 228030085 | 0 | OTHER | complex event  |
| 1-681 | 1 | 229580273 | 229724973 | Misassembly | NONE | 229580273 | 229724973 | 0 | OTHER | complex event  |
| 1-683 | 1 | 230155297 | 230301086 | Misassembly | NONE | 230155297 | 230301086 | 0 | OTHER | complex event  |
| 1-686 | 1 | 230671020 | 230930116 | Misassembly | NONE | 230671020 | 230930116 | 0 | OTHER | complex event  |
| 1-691 | 1 | 231644354 | 231766007 | Misassembly | NONE | 231644354 | 231766007 | 0 | OTHER | complex event  |
| 1-693 | 1 | 232012872 | 232188573 | Misassembly | NONE | 232012872 | 232188573 | 0 | OTHER | complex event  |
| 1-694 | 1 | 232241573 | 232293615 | Misassembly | NONE | 232241573 | 232293615 | 0 | OTHER | complex event  |
| 1-695 | 1 | 232427439 | 232535568 | Misassembly | NONE | 232427439 | 232535568 | 0 | OTHER | complex event  |
| 1-696 | 1 | 232901141 | 233088871 | Misassembly | NONE | 232901141 | 233088871 | 0 | OTHER | complex event  |
| 1-697 | 1 | 233182856 | 233292227 | Misassembly | NONE | 233182856 | 233292227 | 0 | OTHER | complex event  |
| 1-698 | 1 | 233762652 | 234183333 | Misassembly | NONE | 233762652 | 234183333 | 0 | OTHER | complex event  |
| 1-699 | 1 | 234252233 | 234549201 | Misassembly | NONE | 234252233 | 234549201 | 0 | OTHER | with deletion  |
| 1-701 | 1 | 234926818 | 235054514 | Misassembly | NONE | 234926818 | 235054514 | 0 | OTHER | complex event  |
| 1-703 | 1 | 235779480 | 235974956 | Misassembly | NONE | 235779480 | 235974956 | 0 | OTHER | complex event  |
| 1-704 | 1 | 236105320 | 236149134 | Misassembly | NONE | 236105320 | 236149134 | 0 | OTHER | complex event  |
| 1-705 | 1 | 237558097 | 237729885 | Misassembly | NONE | 237558097 | 237729885 | 0 | OTHER | complex event  |
| 1-708 | 1 | 238325669 | 238388200 | Misassembly | NONE | 238325669 | 238388200 | 0 | OTHER | complex event  |
| 1-710 | 1 | 241851700 | 241969755 | Misassembly | NONE | 241851700 | 241969755 | 0 | OTHER | complex event  |
| 1-711 | 1 | 242105875 | 242184516 | Misassembly | NONE | 242105875 | 242184516 | 0 | OTHER | complex event  |
| 1-712 | 1 | 242362469 | 242429176 | Misassembly | NONE | 242362469 | 242429176 | 0 | OTHER | complex event  |
| 1-714 | 1 | 242910572 | 243009436 | Misassembly | NONE | 242910572 | 243009436 | 0 | OTHER | complex event  |
| 1-715 | 1 | 245380305 | 245469706 | Misassembly | NONE | 245380305 | 245469706 | 0 | OTHER | complex event  |
| 1-717 | 1 | 245883582 | 245944625 | Misassembly | NONE | 245883582 | 245944625 | 0 | OTHER | complex event  |
| 1-721 | 1 | 246653376 | 246691753 | Misassembly | NONE | 246653376 | 246691753 | 0 | OTHER | complex event  |
| 1-722 | 1 | 246740089 | 246797299 | Misassembly | NONE | 246740089 | 246797299 | 0 | OTHER | complex event  |
| 1-726 | 1 | 247673385 | 247866561 | Misassembly | NONE | 247673385 | 247866561 | 0 | OTHER | with deletion  |
| 1-727 | 1 | 247982675 | 248201177 | Misassembly | NONE | 247982675 | 248201177 | 0 | OTHER | complex event  |
| 1-729 | 1 | 251332266 | 251548014 | Misassembly | NONE | 251332266 | 251548014 | 0 | OTHER | complex event  |
| 1-730 | 1 | 251754460 | 251870739 | Misassembly | NONE | 251754460 | 251870739 | 0 | OTHER | complex event  |
| 1-731 | 1 | 252442831 | 252519859 | Misassembly | NONE | 252442831 | 252519859 | 0 | OTHER | complex event  |
| 1-733 | 1 | 252721880 | 252850057 | Misassembly | NONE | 252721880 | 252850057 | 0 | OTHER | complex event  |
| 1-734 | 1 | 253089104 | 253116431 | Misassembly | NONE | 253089104 | 253116431 | 0 | OTHER | complex event  |
| 1-735 | 1 | 253319877 | 253414617 | Misassembly | NONE | 253319877 | 253414617 | 0 | OTHER | complex event  |
| 1-736 | 1 | 253472655 | 253604672 | Misassembly | NONE | 253472655 | 253604672 | 0 | OTHER | complex event  |
| 1-737 | 1 | 253775112 | 254213598 | Misassembly | NONE | 253775112 | 254213598 | 0 | OTHER | complex event  |
| 1-738 | 1 | 254507195 | 254547550 | Misassembly | NONE | 254507195 | 254547550 | 0 | OTHER | complex event  |
| 1-739 | 1 | 254595538 | 254685257 | Misassembly | NONE | 254595538 | 254685257 | 0 | OTHER | complex event  |
| 1-740 | 1 | 254789390 | 254905308 | Misassembly | NONE | 254789390 | 254905308 | 0 | OTHER | complex event  |
| 1-742 | 1 | 255254449 | 255406869 | Misassembly | NONE | 255254449 | 255406869 | 0 | OTHER | complex event  |
| 1-745 | 1 | 260334429 | 260396502 | Misassembly | NONE | 260334429 | 260396502 | 0 | OTHER | complex event  |
| 1-749 | 1 | 261138909 | 261242164 | Misassembly | NONE | 261138909 | 261242164 | 0 | OTHER | complex event  |
| 1-750 | 1 | 261508896 | 261639868 | Misassembly | NONE | 261508896 | 261639868 | 0 | OTHER | with deletion  |
| 1-752 | 1 | 264850189 | 264916687 | Misassembly | NONE | 264850189 | 264916687 | 0 | OTHER | complex event  |
| 1-753 | 1 | 265175350 | 265274635 | Misassembly | NONE | 265175350 | 265274635 | 0 | OTHER | complex event  |
| 1-759 | 1 | 267116077 | 267330752 | Misassembly | NONE | 267116077 | 267330752 | 0 | OTHER | complex event  |
| 1-765 | 1 | 270075800 | 270141149 | Misassembly | NONE | 270075800 | 270141149 | 0 | OTHER | complex event  |
| 1-766 | 1 | 270334742 | 270531264 | Misassembly | NONE | 270334742 | 270531264 | 0 | OTHER | complex event  |
| 1-768 | 1 | 271863227 | 271899084 | Misassembly | NONE | 271863227 | 271899084 | 0 | OTHER | complex event  |
| 1-769 | 1 | 272119769 | 272193595 | Misassembly | NONE | 272119769 | 272193595 | 0 | OTHER | complex event  |
| 1-771 | 1 | 272403779 | 272499208 | Misassembly | NONE | 272403779 | 272499208 | 0 | OTHER | complex event  |
| 1-772 | 1 | 272598202 | 272621433 | Misassembly | NONE | 272598202 | 272621433 | 0 | OTHER | complex event  |
| 1-773 | 1 | 272779416 | 272825693 | Misassembly | NONE | 272779416 | 272825693 | 0 | OTHER | complex event  |
| 1-774 | 1 | 272904779 | 272964344 | Misassembly | NONE | 272904779 | 272964344 | 0 | OTHER | complex event  |
| 1-775 | 1 | 273119240 | 273244688 | Misassembly | NONE | 273119240 | 273244688 | 0 | OTHER | complex event  |
| 1-776 | 1 | 273269280 | 273362872 | Misassembly | NONE | 273269280 | 273362872 | 0 | OTHER | complex event  |
| 1-778 | 1 | 273572425 | 273695741 | Misassembly | NONE | 273572425 | 273695741 | 0 | OTHER | complex event  |
| 1-779 | 1 | 273727799 | 273877122 | Misassembly | NONE | 273727799 | 273877122 | 0 | OTHER | complex event  |
| 1-781 | 1 | 275182629 | 275315316 | Misassembly | NONE | 275182629 | 275315316 | 0 | OTHER | complex event  |
| 1-784 | 1 | 278246313 | 278335314 | Misassembly | NONE | 278246313 | 278335314 | 0 | OTHER | complex event  |
| 1-786 | 1 | 278589705 | 278836319 | Misassembly | NONE | 278589705 | 278836319 | 0 | OTHER | with deletion  |
| 1-789 | 1 | 283500795 | 283830639 | Misassembly | NONE | 283500795 | 283830639 | 0 | OTHER | complex event  |
| 1-790 | 1 | 284196770 | 284499252 | Misassembly | NONE | 284196770 | 284499252 | 0 | OTHER | complex event  |
| 1-791 | 1 | 284573712 | 284665312 | Misassembly | NONE | 284573712 | 284665312 | 0 | OTHER | complex event  |
| 1-792 | 1 | 284719491 | 284815796 | Misassembly | NONE | 284719491 | 284815796 | 0 | OTHER | complex event  |
| 1-794 | 1 | 284980674 | 285180475 | Misassembly | NONE | 284980674 | 285180475 | 0 | OTHER | complex event  |
| 1-796 | 1 | 286793203 | 286851441 | Misassembly | NONE | 286793203 | 286851441 | 0 | OTHER | complex event  |
| 1-798 | 1 | 288644932 | 288782224 | Misassembly | NONE | 288644932 | 288782224 | 0 | OTHER | complex event  |
| 1-799 | 1 | 289006375 | 289120954 | Misassembly | NONE | 289006375 | 289120954 | 0 | OTHER | complex event  |
| 1-801 | 1 | 289477372 | 289575457 | Misassembly | NONE | 289477372 | 289575457 | 0 | OTHER | complex event  |
| 1-804 | 1 | 290236145 | 290437845 | Misassembly | NONE | 290236145 | 290437845 | 0 | OTHER | complex event  |
| 1-805 | 1 | 290584566 | 290639348 | Misassembly | NONE | 290584566 | 290639348 | 0 | OTHER | complex event  |
| 1-806 | 1 | 290747934 | 290805278 | Misassembly | NONE | 290747934 | 290805278 | 0 | OTHER | complex event  |
| 1-809 | 1 | 291376335 | 291543222 | Misassembly | NONE | 291376335 | 291543222 | 0 | OTHER | complex event  |
| 1-810 | 1 | 291693501 | 291862915 | Misassembly | NONE | 291693501 | 291862915 | 0 | OTHER | complex event  |
| 1-811 | 1 | 296848980 | 296943712 | Misassembly | NONE | 296848980 | 296943712 | 0 | OTHER | complex event  |
| 1-812 | 1 | 297109220 | 297135786 | Misassembly | NONE | 297109220 | 297135786 | 0 | OTHER | complex event  |
| 1-813 | 1 | 297364078 | 297452662 | Misassembly | NONE | 297364078 | 297452662 | 0 | OTHER | complex event  |
| 1-817 | 1 | 299546828 | 299637647 | Misassembly | NONE | 299546828 | 299637647 | 0 | OTHER | complex event  |
| 2-1   | 2 | 859753    | 963083    | Misassembly | NONE | 859753    | 963083    | 0 | OTHER | complex event  |
| 2-2   | 2 | 1486958   | 1546539   | Misassembly | NONE | 1486958   | 1546539   | 0 | OTHER | complex event  |
| 2-5   | 2 | 4905528   | 5045210   | Misassembly | NONE | 4905528   | 5045210   | 0 | OTHER | complex event  |
| 2-9   | 2 | 5592134   | 5769170   | Misassembly | NONE | 5592134   | 5769170   | 0 | OTHER | complex event  |

|       |   |          |          |              |      |          |          |   |       |                              |
|-------|---|----------|----------|--------------|------|----------|----------|---|-------|------------------------------|
| 2-13  | 2 | 6069129  | 6175933  | Misassembley | NONE | 6069129  | 6175933  | 0 | OTHER | complex event                |
| 2-16  | 2 | 11996378 | 12245157 | Misassembley | NONE | 11996378 | 12245157 | 0 | OTHER | complex event                |
| 2-18  | 2 | 12319431 | 12394245 | Misassembley | NONE | 12319431 | 12394245 | 0 | OTHER | complex event                |
| 2-21  | 2 | 13075343 | 13223191 | Misassembley | NONE | 13075343 | 13223191 | 0 | OTHER | complex event                |
| 2-23  | 2 | 13985412 | 14183700 | Misassembley | NONE | 13985412 | 14183700 | 0 | OTHER | complex event                |
| 2-24  | 2 | 14485968 | 14703210 | Misassembley | NONE | 14485968 | 14703210 | 0 | OTHER | complex event                |
| 2-25  | 2 | 14713154 | 15176472 | Misassembley | NONE | 14713154 | 15176472 | 0 | OTHER | complex event                |
| 2-26  | 2 | 15285171 | 15417570 | Misassembley | NONE | 15285171 | 15417570 | 0 | OTHER | complex event                |
| 2-27  | 2 | 15602597 | 15782390 | Misassembley | NONE | 15602597 | 15782390 | 0 | OTHER | complex event                |
| 2-31  | 2 | 16796980 | 16882066 | Misassembley | NONE | 16796980 | 16882066 | 0 | OTHER | complex event                |
| 2-32  | 2 | 17474464 | 17532482 | Misassembley | NONE | 17474464 | 17532482 | 0 | OTHER | complex event                |
| 2-33  | 2 | 17662822 | 17692069 | Misassembley | NONE | 17662822 | 17692069 | 0 | OTHER | complex event                |
| 2-34  | 2 | 17834593 | 17943853 | Misassembley | NONE | 17834593 | 17943853 | 0 | OTHER | complex event                |
| 2-35  | 2 | 17992557 | 18217667 | Misassembley | NONE | 17992557 | 18217667 | 0 | OTHER | complex event                |
| 2-36  | 2 | 18747698 | 18857217 | Misassembley | NONE | 18747698 | 18857217 | 0 | OTHER | complex event                |
| 2-39  | 2 | 19317127 | 19387950 | Misassembley | NONE | 19317127 | 19387950 | 0 | OTHER | complex event                |
| 2-41  | 2 | 19912492 | 19992864 | Misassembley | NONE | 19912492 | 19992864 | 0 | OTHER | complex event                |
| 2-42  | 2 | 20138692 | 20198397 | Misassembley | NONE | 20138692 | 20198397 | 0 | OTHER | complex event                |
| 2-44  | 2 | 20531527 | 20836743 | Misassembley | NONE | 20531527 | 20836743 | 0 | OTHER | complex event                |
| 2-47  | 2 | 21403361 | 21639734 | Misassembley | NONE | 21403361 | 21639734 | 0 | OTHER | complex event                |
| 2-49  | 2 | 22200666 | 22368197 | Misassembley | NONE | 22200666 | 22368197 | 0 | OTHER | complex event                |
| 2-50  | 2 | 22389712 | 22843343 | Misassembley | NONE | 22389712 | 22843343 | 0 | OTHER | complex event                |
| 2-51  | 2 | 22878641 | 22919977 | Misassembley | NONE | 22878641 | 22919977 | 0 | OTHER | complex event                |
| 2-52  | 2 | 23229187 | 23305678 | Misassembley | NONE | 23229187 | 23305678 | 0 | OTHER | complex event                |
| 2-57  | 2 | 24044263 | 24156689 | Misassembley | NONE | 24044263 | 24156689 | 0 | OTHER | complex event with insertion |
| 2-59  | 2 | 24376159 | 24615012 | Misassembley | NONE | 24376159 | 24615012 | 0 | OTHER | complex event                |
| 2-60  | 2 | 24757995 | 25231099 | Misassembley | NONE | 24757995 | 25231099 | 0 | OTHER | complex event                |
| 2-61  | 2 | 25278856 | 25414783 | Misassembley | NONE | 25278856 | 25414783 | 0 | OTHER | complex event                |
| 2-62  | 2 | 25455953 | 25629097 | Misassembley | NONE | 25455953 | 25629097 | 0 | OTHER | complex event                |
| 2-63  | 2 | 25899233 | 26015662 | Misassembley | NONE | 25899233 | 26015662 | 0 | OTHER | complex event                |
| 2-64  | 2 | 26136616 | 26299977 | Misassembley | NONE | 26136616 | 26299977 | 0 | OTHER | complex event                |
| 2-65  | 2 | 26365534 | 26516862 | Misassembley | NONE | 26365534 | 26516862 | 0 | OTHER | complex event                |
| 2-67  | 2 | 26654982 | 26751093 | Misassembley | NONE | 26654982 | 26751093 | 0 | OTHER | complex event                |
| 2-69  | 2 | 27334837 | 27400634 | Misassembley | NONE | 27334837 | 27400634 | 0 | OTHER | complex event                |
| 2-72  | 2 | 28014425 | 28086901 | Misassembley | NONE | 28014425 | 28086901 | 0 | OTHER | complex event                |
| 2-73  | 2 | 28205372 | 28315732 | Misassembley | NONE | 28205372 | 28315732 | 0 | OTHER | complex event                |
| 2-74  | 2 | 28335728 | 28437665 | Misassembley | NONE | 28335728 | 28437665 | 0 | OTHER | complex event                |
| 2-75  | 2 | 28487714 | 28737176 | Misassembley | NONE | 28487714 | 28737176 | 0 | OTHER | complex event                |
| 2-78  | 2 | 31511605 | 31632860 | Misassembley | NONE | 31511605 | 31632860 | 0 | OTHER | complex event                |
| 2-79  | 2 | 31720972 | 31777202 | Misassembley | NONE | 31720972 | 31777202 | 0 | OTHER | complex event                |
| 2-81  | 2 | 32052487 | 32126788 | Misassembley | NONE | 32052487 | 32126788 | 0 | OTHER | complex event                |
| 2-82  | 2 | 32184744 | 32339756 | Misassembley | NONE | 32184744 | 32339756 | 0 | OTHER | complex event                |
| 2-83  | 2 | 32497125 | 32570938 | Misassembley | NONE | 32497125 | 32570938 | 0 | OTHER | complex event                |
| 2-85  | 2 | 32762974 | 32875515 | Misassembley | NONE | 32762974 | 32875515 | 0 | OTHER | complex event                |
| 2-86  | 2 | 32896463 | 32919861 | Misassembley | NONE | 32896463 | 32919861 | 0 | OTHER | complex event                |
| 2-87  | 2 | 33001648 | 33036625 | Misassembley | NONE | 33001648 | 33036625 | 0 | OTHER | complex event                |
| 2-89  | 2 | 33366745 | 33420281 | Misassembley | NONE | 33366745 | 33420281 | 0 | OTHER | complex event                |
| 2-90  | 2 | 33689815 | 33814426 | Misassembley | NONE | 33689815 | 33814426 | 0 | OTHER | complex event                |
| 2-91  | 2 | 33920814 | 33959460 | Misassembley | NONE | 33920814 | 33959460 | 0 | OTHER | complex event                |
| 2-94  | 2 | 36854729 | 36940351 | Misassembley | NONE | 36854729 | 36940351 | 0 | OTHER | complex event                |
| 2-96  | 2 | 38707404 | 38827003 | Misassembley | NONE | 38707404 | 38827003 | 0 | OTHER | complex event                |
| 2-97  | 2 | 38874153 | 38936995 | Misassembley | NONE | 38874153 | 38936995 | 0 | OTHER | complex event                |
| 2-99  | 2 | 39107809 | 39210923 | Misassembley | NONE | 39107809 | 39210923 | 0 | OTHER | complex event                |
| 2-103 | 2 | 40066631 | 40168241 | Misassembley | NONE | 40066631 | 40168241 | 0 | OTHER | complex event                |
| 2-105 | 2 | 40392373 | 40433915 | Misassembley | NONE | 40392373 | 40433915 | 0 | OTHER | complex event                |
| 2-106 | 2 | 42692842 | 42738237 | Misassembley | NONE | 42692842 | 42738237 | 0 | OTHER | complex event                |
| 2-107 | 2 | 42979583 | 43083337 | Misassembley | NONE | 42979583 | 43083337 | 0 | OTHER | complex event                |
| 2-108 | 2 | 43266629 | 43409820 | Misassembley | NONE | 43266629 | 43409820 | 0 | OTHER | complex event                |
| 2-111 | 2 | 45147558 | 45214391 | Misassembley | NONE | 45147558 | 45214391 | 0 | OTHER | complex event                |
| 2-112 | 2 | 45274828 | 45335267 | Misassembley | NONE | 45274828 | 45335267 | 0 | OTHER | complex event                |
| 2-113 | 2 | 45444710 | 45619022 | Misassembley | NONE | 45444710 | 45619022 | 0 | OTHER | complex event                |
| 2-121 | 2 | 46925999 | 47015172 | Misassembley | NONE | 46925999 | 47015172 | 0 | OTHER | complex event                |
| 2-122 | 2 | 47262996 | 47318186 | Misassembley | NONE | 47262996 | 47318186 | 0 | OTHER | complex event                |
| 2-123 | 2 | 47414818 | 47521784 | Misassembley | NONE | 47414818 | 47521784 | 0 | OTHER | complex event                |
| 2-125 | 2 | 48018369 | 48130671 | Misassembley | NONE | 48018369 | 48130671 | 0 | OTHER | complex event                |
| 2-126 | 2 | 48193209 | 48247213 | Misassembley | NONE | 48193209 | 48247213 | 0 | OTHER | complex event                |
| 2-129 | 2 | 48797952 | 48951488 | Misassembley | NONE | 48797952 | 48951488 | 0 | OTHER | complex event                |
| 2-130 | 2 | 49058058 | 49130048 | Misassembley | NONE | 49058058 | 49130048 | 0 | OTHER | complex event                |
| 2-132 | 2 | 49270784 | 49351322 | Misassembley | NONE | 49270784 | 49351322 | 0 | OTHER | complex event                |
| 2-133 | 2 | 49669474 | 49704109 | Misassembley | NONE | 49669474 | 49704109 | 0 | OTHER | complex event                |
| 2-134 | 2 | 51353055 | 51464185 | Misassembley | NONE | 51353055 | 51464185 | 0 | OTHER | complex event                |
| 2-135 | 2 | 52051705 | 52118187 | Misassembley | NONE | 52051705 | 52118187 | 0 | OTHER | complex event                |
| 2-136 | 2 | 52204570 | 52364824 | Misassembley | NONE | 52204570 | 52364824 | 0 | OTHER | complex event                |
| 2-137 | 2 | 52486051 | 52808659 | Misassembley | NONE | 52486051 | 52808659 | 0 | OTHER | complex event                |
| 2-142 | 2 | 54305943 | 54353933 | Misassembley | NONE | 54305943 | 54353933 | 0 | OTHER | complex event                |
| 2-145 | 2 | 58100235 | 58264910 | Misassembley | NONE | 58100235 | 58264910 | 0 | OTHER | complex event                |
| 2-146 | 2 | 58703588 | 58802522 | Misassembley | NONE | 58703588 | 58802522 | 0 | OTHER | complex event                |
| 2-148 | 2 | 60137265 | 60253407 | Misassembley | NONE | 60137265 | 60253407 | 0 | OTHER | complex event                |
| 2-149 | 2 | 60734056 | 61038339 | Misassembley | NONE | 60734056 | 61038339 | 0 | OTHER | complex event                |
| 2-150 | 2 | 61198154 | 61494703 | Misassembley | NONE | 61198154 | 61494703 | 0 | OTHER | complex event                |
| 2-152 | 2 | 62126259 | 62166376 | Misassembley | NONE | 62126259 | 62166376 | 0 | OTHER | complex event                |
| 2-153 | 2 | 62258110 | 62357206 | Misassembley | NONE | 62258110 | 62357206 | 0 | OTHER | complex event                |
| 2-157 | 2 | 65807980 | 65907336 | Misassembley | NONE | 65807980 | 65907336 | 0 | OTHER | complex event                |
| 2-159 | 2 | 66235049 | 66512838 | Misassembley | NONE | 66235049 | 66512838 | 0 | OTHER | complex event                |
| 2-162 | 2 | 67031907 | 67128181 | Misassembley | NONE | 67031907 | 67128181 | 0 | OTHER | complex event                |
| 2-164 | 2 | 67274008 | 67374553 | Misassembley | NONE | 67274008 | 67374553 | 0 | OTHER | complex event                |
| 2-169 | 2 | 67891251 | 68029025 | Misassembley | NONE | 67891251 | 68029025 | 0 | OTHER | complex event                |
| 2-170 | 2 | 68146205 | 68251446 | Misassembley | NONE | 68146205 | 68251446 | 0 | OTHER | complex event                |
| 2-171 | 2 | 68392820 | 68470132 | Misassembley | NONE | 68392820 | 68470132 | 0 | OTHER | complex event                |
| 2-173 | 2 | 68811726 | 68898680 | Misassembley | NONE | 68811726 | 68898680 | 0 | OTHER | complex event                |

|       |   |           |           |              |      |           |           |   |       |                             |
|-------|---|-----------|-----------|--------------|------|-----------|-----------|---|-------|-----------------------------|
| 2-174 | 2 | 68922520  | 69022677  | Misassembled | NONE | 68922520  | 69022677  | 0 | OTHER | complex event               |
| 2-175 | 2 | 69231754  | 69272410  | Misassembled | NONE | 69231754  | 69272410  | 0 | OTHER | complex event               |
| 2-176 | 2 | 69335178  | 69443258  | Misassembled | NONE | 69335178  | 69443258  | 0 | OTHER | complex event               |
| 2-177 | 2 | 69484100  | 69547744  | Misassembled | NONE | 69484100  | 69547744  | 0 | OTHER | complex event               |
| 2-179 | 2 | 70151042  | 70398925  | Misassembled | NONE | 70151042  | 70398925  | 0 | OTHER | complex event               |
| 2-181 | 2 | 70748475  | 71045915  | Misassembled | NONE | 70748475  | 71045915  | 0 | OTHER | complex event               |
| 2-182 | 2 | 71099062  | 71252777  | Misassembled | NONE | 71099062  | 71252777  | 0 | OTHER | complex event               |
| 2-183 | 2 | 71385459  | 71691800  | Misassembled | NONE | 71385459  | 71691800  | 0 | OTHER | complex event               |
| 2-185 | 2 | 72179709  | 72251771  | Misassembled | NONE | 72179709  | 72251771  | 0 | OTHER | complex event               |
| 2-190 | 2 | 73264823  | 73352093  | Misassembled | NONE | 73264823  | 73352093  | 0 | OTHER | complex event               |
| 2-191 | 2 | 73521247  | 73620835  | Misassembled | NONE | 73521247  | 73620835  | 0 | OTHER | complex event               |
| 2-192 | 2 | 73765170  | 73969922  | Misassembled | NONE | 73765170  | 73969922  | 0 | OTHER | complex event               |
| 2-193 | 2 | 74082393  | 74284546  | Misassembled | NONE | 74082393  | 74284546  | 0 | OTHER | complex event               |
| 2-194 | 2 | 74470819  | 74520374  | Misassembled | NONE | 74470819  | 74520374  | 0 | OTHER | complex event               |
| 2-196 | 2 | 75175686  | 75396379  | Misassembled | NONE | 75175686  | 75396379  | 0 | OTHER | complex event               |
| 2-197 | 2 | 75490498  | 75525157  | Misassembled | NONE | 75490498  | 75525157  | 0 | OTHER | complex event               |
| 2-198 | 2 | 75673517  | 75825372  | Misassembled | NONE | 75673517  | 75825372  | 0 | OTHER | complex event with deletion |
| 2-201 | 2 | 76224383  | 76306619  | Misassembled | NONE | 76224383  | 76306619  | 0 | OTHER | complex event               |
| 2-203 | 2 | 76677009  | 76762136  | Misassembled | NONE | 76677009  | 76762136  | 0 | OTHER | complex event               |
| 2-204 | 2 | 77063447  | 77126738  | Misassembled | NONE | 77063447  | 77126738  | 0 | OTHER | complex event               |
| 2-206 | 2 | 79779039  | 80254000  | Misassembled | NONE | 79779039  | 80254000  | 0 | OTHER | complex event               |
| 2-209 | 2 | 80986613  | 81269902  | Misassembled | NONE | 80986613  | 81269902  | 0 | OTHER | complex event               |
| 2-210 | 2 | 81335749  | 81526386  | Misassembled | NONE | 81335749  | 81526386  | 0 | OTHER | complex event               |
| 2-214 | 2 | 82166797  | 82272296  | Misassembled | NONE | 82166797  | 82272296  | 0 | OTHER | complex event               |
| 2-218 | 2 | 83778340  | 83930910  | Misassembled | NONE | 83778340  | 83930910  | 0 | OTHER | complex event               |
| 2-219 | 2 | 84135397  | 84318822  | Misassembled | NONE | 84135397  | 84318822  | 0 | OTHER | complex event               |
| 2-220 | 2 | 84482521  | 84582143  | Misassembled | NONE | 84482521  | 84582143  | 0 | OTHER | complex event               |
| 2-222 | 2 | 84908407  | 85041784  | Misassembled | NONE | 84908407  | 85041784  | 0 | OTHER | complex event               |
| 2-224 | 2 | 85727558  | 86035333  | Misassembled | NONE | 85727558  | 86035333  | 0 | OTHER | complex event               |
| 2-227 | 2 | 86641301  | 86774658  | Misassembled | NONE | 86641301  | 86774658  | 0 | OTHER | complex event               |
| 2-230 | 2 | 87307453  | 87490237  | Misassembled | NONE | 87307453  | 87490237  | 0 | OTHER | complex event               |
| 2-231 | 2 | 87895592  | 88081837  | Misassembled | NONE | 87895592  | 88081837  | 0 | OTHER | complex event               |
| 2-233 | 2 | 88841514  | 88925641  | Misassembled | NONE | 88841514  | 88925641  | 0 | OTHER | complex event               |
| 2-234 | 2 | 91227851  | 91269780  | Misassembled | NONE | 91227851  | 91269780  | 0 | OTHER | complex event               |
| 2-235 | 2 | 91661596  | 92067913  | Misassembled | NONE | 91661596  | 92067913  | 0 | OTHER | complex event               |
| 2-237 | 2 | 92352622  | 92590287  | Misassembled | NONE | 92352622  | 92590287  | 0 | OTHER | complex event               |
| 2-239 | 2 | 92950520  | 93084434  | Misassembled | NONE | 92950520  | 93084434  | 0 | OTHER | complex event               |
| 2-240 | 2 | 93283415  | 93337185  | Misassembled | NONE | 93283415  | 93337185  | 0 | OTHER | complex event               |
| 2-247 | 2 | 94421906  | 94798350  | Misassembled | NONE | 94421906  | 94798350  | 0 | OTHER | complex event               |
| 2-248 | 2 | 95036972  | 95234356  | Misassembled | NONE | 95036972  | 95234356  | 0 | OTHER | complex event               |
| 2-249 | 2 | 95949846  | 95991314  | Misassembled | NONE | 95949846  | 95991314  | 0 | OTHER | complex event               |
| 2-257 | 2 | 97765093  | 97924112  | Misassembled | NONE | 97765093  | 97924112  | 0 | OTHER | complex event               |
| 2-258 | 2 | 97964821  | 97979959  | Misassembled | NONE | 97964821  | 97979959  | 0 | OTHER | complex event               |
| 2-262 | 2 | 99026037  | 99178709  | Misassembled | NONE | 99026037  | 99178709  | 0 | OTHER | complex event               |
| 2-263 | 2 | 99336380  | 99537733  | Misassembled | NONE | 99336380  | 99537733  | 0 | OTHER | complex event               |
| 2-266 | 2 | 99901294  | 100004218 | Misassembled | NONE | 99901294  | 100004218 | 0 | OTHER | complex event               |
| 2-268 | 2 | 100611804 | 100797783 | Misassembled | NONE | 100611804 | 100797783 | 0 | OTHER | complex event               |
| 2-269 | 2 | 100922221 | 101106119 | Misassembled | NONE | 100922221 | 101106119 | 0 | OTHER | complex event               |
| 2-270 | 2 | 101133473 | 101256625 | Misassembled | NONE | 101133473 | 101256625 | 0 | OTHER | complex event               |
| 2-271 | 2 | 101256625 | 101640819 | Misassembled | NONE | 101256625 | 101640819 | 0 | OTHER | complex event               |
| 2-272 | 2 | 102159211 | 102272738 | Misassembled | NONE | 102159211 | 102272738 | 0 | OTHER | complex event               |
| 2-274 | 2 | 102660258 | 102944328 | Misassembled | NONE | 102660258 | 102944328 | 0 | OTHER | complex event               |
| 2-275 | 2 | 103177484 | 103325749 | Misassembled | NONE | 103177484 | 103325749 | 0 | OTHER | complex event               |
| 2-276 | 2 | 103641567 | 103717667 | Misassembled | NONE | 103641567 | 103717667 | 0 | OTHER | complex event               |
| 2-277 | 2 | 103799081 | 103851893 | Misassembled | NONE | 103799081 | 103851893 | 0 | OTHER | complex event               |
| 2-282 | 2 | 189363566 | 189497013 | Misassembled | NONE | 189363566 | 189497013 | 0 | OTHER | complex event               |
| 2-284 | 2 | 194882406 | 194945119 | Misassembled | NONE | 194882406 | 194945119 | 0 | OTHER | complex event               |
| 2-286 | 2 | 196939722 | 197373147 | Misassembled | NONE | 196939722 | 197373147 | 0 | OTHER | complex event               |
| 2-288 | 2 | 197608130 | 197709195 | Misassembled | NONE | 197608130 | 197709195 | 0 | OTHER | complex event               |
| 2-290 | 2 | 198984152 | 199177176 | Misassembled | NONE | 198984152 | 199177176 | 0 | OTHER | complex event               |
| 2-293 | 2 | 199632458 | 199668839 | Misassembled | NONE | 199632458 | 199668839 | 0 | OTHER | complex event               |
| 2-295 | 2 | 203197237 | 203280346 | Misassembled | NONE | 203197237 | 203280346 | 0 | OTHER | complex event               |
| 2-296 | 2 | 203383129 | 203637844 | Misassembled | NONE | 203383129 | 203637844 | 0 | OTHER | complex event               |
| 2-298 | 2 | 203738778 | 203763405 | Misassembled | NONE | 203738778 | 203763405 | 0 | OTHER | complex event               |
| 2-299 | 2 | 204237239 | 204316337 | Misassembled | NONE | 204237239 | 204316337 | 0 | OTHER | complex event               |
| 2-300 | 2 | 204539260 | 204681774 | Misassembled | NONE | 204539260 | 204681774 | 0 | OTHER | complex event               |
| 2-304 | 2 | 208527394 | 208602594 | Misassembled | NONE | 208527394 | 208602594 | 0 | OTHER | complex event               |
| 2-305 | 2 | 208655802 | 208674250 | Misassembled | NONE | 208655802 | 208674250 | 0 | OTHER | complex event               |
| 2-308 | 2 | 209097763 | 209370926 | Misassembled | NONE | 209097763 | 209370926 | 0 | OTHER | complex event               |
| 2-312 | 2 | 211311287 | 211411316 | Misassembled | NONE | 211311287 | 211411316 | 0 | OTHER | complex event               |
| 2-314 | 2 | 211628613 | 211811746 | Misassembled | NONE | 211628613 | 211811746 | 0 | OTHER | complex event               |
| 2-317 | 2 | 212057375 | 212278684 | Misassembled | NONE | 212057375 | 212278684 | 0 | OTHER | complex event               |
| 2-319 | 2 | 216246044 | 216342531 | Misassembled | NONE | 216246044 | 216342531 | 0 | OTHER | complex event               |
| 2-324 | 2 | 217110260 | 217266066 | Misassembled | NONE | 217110260 | 217266066 | 0 | OTHER | complex event               |
| 2-325 | 2 | 218744567 | 218954475 | Misassembled | NONE | 218744567 | 218954475 | 0 | OTHER | complex event               |
| 2-330 | 2 | 219762207 | 219972893 | Misassembled | NONE | 219762207 | 219972893 | 0 | OTHER | complex event               |
| 2-331 | 2 | 220052739 | 220163952 | Misassembled | NONE | 220052739 | 220163952 | 0 | OTHER | complex event               |
| 2-332 | 2 | 220259708 | 220481297 | Misassembled | NONE | 220259708 | 220481297 | 0 | OTHER | complex event               |
| 2-340 | 2 | 225073128 | 225145798 | Misassembled | NONE | 225073128 | 225145798 | 0 | OTHER | complex event               |
| 2-341 | 2 | 226475905 | 226525949 | Misassembled | NONE | 226475905 | 226525949 | 0 | OTHER | complex event               |
| 2-345 | 2 | 228002699 | 228212397 | Misassembled | NONE | 228002699 | 228212397 | 0 | OTHER | complex event with deletion |
| 2-347 | 2 | 228829590 | 228963092 | Misassembled | NONE | 228829590 | 228963092 | 0 | OTHER | complex event               |
| 2-350 | 2 | 229816274 | 229855859 | Misassembled | NONE | 229816274 | 229855859 | 0 | OTHER | complex event               |
| 2-352 | 2 | 230348715 | 230403460 | Misassembled | NONE | 230348715 | 230403460 | 0 | OTHER | complex event               |
| 2-356 | 2 | 231313101 | 231545743 | Misassembled | NONE | 231313101 | 231545743 | 0 | OTHER | complex event               |
| 3-1   | 3 | 1593292   | 1696426   | Misassembled | NONE | 1593292   | 1696426   | 0 | OTHER | complex event               |
| 3-3   | 3 | 2266310   | 2422606   | Misassembled | NONE | 2266310   | 2422606   | 0 | OTHER | complex event               |
| 3-4   | 3 | 2604090   | 2786083   | Misassembled | NONE | 2604090   | 2786083   | 0 | OTHER | complex event               |
| 3-5   | 3 | 2853219   | 3224723   | Misassembled | NONE | 2853219   | 3224723   | 0 | OTHER | complex event               |

|       |   |          |          |             |      |          |          |   |       |                                    |
|-------|---|----------|----------|-------------|------|----------|----------|---|-------|------------------------------------|
| 3-7   | 3 | 3682919  | 3768502  | Misassembly | NONE | 3682919  | 3768502  | 0 | OTHER | complex event                      |
| 3-9   | 3 | 7855691  | 8053897  | Misassembly | NONE | 7855691  | 8053897  | 0 | OTHER | complex event                      |
| 3-10  | 3 | 8349073  | 8472002  | Misassembly | NONE | 8349073  | 8472002  | 0 | OTHER | complex event                      |
| 3-14  | 3 | 16253133 | 16322026 | Misassembly | NONE | 16253133 | 16322026 | 0 | OTHER | complex event                      |
| 3-17  | 3 | 17790119 | 17941848 | Misassembly | NONE | 17790119 | 17941848 | 0 | OTHER | complex event                      |
| 3-19  | 3 | 18287511 | 18369665 | Misassembly | NONE | 18287511 | 18369665 | 0 | OTHER | complex event                      |
| 3-27  | 3 | 26605663 | 26629527 | Misassembly | NONE | 26605663 | 26629527 | 0 | OTHER | complex event                      |
| 3-29  | 3 | 27119752 | 27596188 | Misassembly | NONE | 27119752 | 27596188 | 0 | OTHER | complex event                      |
| 3-30  | 3 | 27735872 | 27774191 | Misassembly | NONE | 27735872 | 27774191 | 0 | OTHER | complex event                      |
| 3-31  | 3 | 27828933 | 27925092 | Misassembly | NONE | 27828933 | 27925092 | 0 | OTHER | complex event                      |
| 3-36  | 3 | 29259619 | 29287749 | Misassembly | NONE | 29259619 | 29287749 | 0 | OTHER | complex event                      |
| 3-37  | 3 | 29343416 | 29376462 | Misassembly | NONE | 29343416 | 29376462 | 0 | OTHER | complex event                      |
| 3-40  | 3 | 29896497 | 30315262 | Misassembly | NONE | 29896497 | 30315262 | 0 | OTHER | complex event                      |
| 3-44  | 3 | 31109943 | 31472455 | Misassembly | NONE | 31109943 | 31472455 | 0 | OTHER | complex event                      |
| 3-47  | 3 | 31887763 | 32174298 | Misassembly | NONE | 31887763 | 32174298 | 0 | OTHER | complex event                      |
| 3-48  | 3 | 32357631 | 32442281 | Misassembly | NONE | 32357631 | 32442281 | 0 | OTHER | complex event                      |
| 3-53  | 3 | 33672622 | 33809914 | Misassembly | NONE | 33672622 | 33809914 | 0 | OTHER | complex event                      |
| 3-58  | 3 | 35163784 | 35276645 | Misassembly | NONE | 35163784 | 35276645 | 0 | OTHER | complex event                      |
| 3-59  | 3 | 35327297 | 35841709 | Misassembly | NONE | 35327297 | 35841709 | 0 | OTHER | complex event                      |
| 3-60  | 3 | 35919432 | 35963612 | Misassembly | NONE | 35919432 | 35963612 | 0 | OTHER | complex event                      |
| 3-63  | 3 | 36401405 | 36424335 | Misassembly | NONE | 36401405 | 36424335 | 0 | OTHER | complex event                      |
| 3-67  | 3 | 37625143 | 37713508 | Misassembly | NONE | 37625143 | 37713508 | 0 | OTHER | complex event                      |
| 3-73  | 3 | 38368157 | 38455762 | Misassembly | NONE | 38368157 | 38455762 | 0 | OTHER | complex event                      |
| 3-74  | 3 | 38501238 | 38763425 | Misassembly | NONE | 38501238 | 38763425 | 0 | OTHER | complex event with deletion        |
| 3-75  | 3 | 38873164 | 38983547 | Misassembly | NONE | 38873164 | 38983547 | 0 | OTHER | complex event                      |
| 3-76  | 3 | 39012849 | 39139473 | Misassembly | NONE | 39012849 | 39139473 | 0 | OTHER | complex event                      |
| 3-78  | 3 | 39832254 | 40066307 | Misassembly | NONE | 39832254 | 40066307 | 0 | OTHER | complex event                      |
| 3-79  | 3 | 40152923 | 40358847 | Misassembly | NONE | 40152923 | 40358847 | 0 | OTHER | complex event                      |
| 3-80  | 3 | 40437198 | 40581164 | Misassembly | NONE | 40437198 | 40581164 | 0 | OTHER | complex event                      |
| 3-81  | 3 | 40829369 | 40882876 | Misassembly | NONE | 40829369 | 40882876 | 0 | OTHER | complex event                      |
| 3-84  | 3 | 41080861 | 41416142 | Misassembly | NONE | 41080861 | 41416142 | 0 | OTHER | complex event                      |
| 3-86  | 3 | 41880914 | 41881728 | Misassembly | NONE | 41880914 | 41881728 | 0 | OTHER | complex event                      |
| 3-88  | 3 | 42170701 | 42391795 | Misassembly | NONE | 42170701 | 42391795 | 0 | OTHER | complex event                      |
| 3-91  | 3 | 42761491 | 42902811 | Misassembly | NONE | 42761491 | 42902811 | 0 | OTHER | complex event                      |
| 3-92  | 3 | 43066625 | 43181881 | Misassembly | NONE | 43066625 | 43181881 | 0 | OTHER | complex event                      |
| 3-93  | 3 | 43290446 | 43458537 | Misassembly | NONE | 43290446 | 43458537 | 0 | OTHER | complex event                      |
| 3-95  | 3 | 44004699 | 44061933 | Misassembly | NONE | 44004699 | 44061933 | 0 | OTHER | complex event                      |
| 3-96  | 3 | 44282043 | 44360752 | Misassembly | NONE | 44282043 | 44360752 | 0 | OTHER | complex event                      |
| 3-100 | 3 | 45375358 | 45460148 | Misassembly | NONE | 45375358 | 45460148 | 0 | OTHER | complex event                      |
| 3-102 | 3 | 45926283 | 46057623 | Misassembly | NONE | 45926283 | 46057623 | 0 | OTHER | complex event                      |
| 3-104 | 3 | 46323308 | 46375563 | Misassembly | NONE | 46323308 | 46375563 | 0 | OTHER | complex event                      |
| 3-107 | 3 | 46770254 | 46866970 | Misassembly | NONE | 46770254 | 46866970 | 0 | OTHER | complex event with large insertion |
| 3-108 | 3 | 47068725 | 47159695 | Misassembly | NONE | 47068725 | 47159695 | 0 | OTHER | complex event                      |
| 3-109 | 3 | 47213404 | 47323197 | Misassembly | NONE | 47213404 | 47323197 | 0 | OTHER | complex event                      |
| 3-112 | 3 | 47838519 | 47980813 | Misassembly | NONE | 47838519 | 47980813 | 0 | OTHER | complex event                      |
| 3-113 | 3 | 48179880 | 48419724 | Misassembly | NONE | 48179880 | 48419724 | 0 | OTHER | complex event                      |
| 3-115 | 3 | 48923281 | 49182246 | Misassembly | NONE | 48923281 | 49182246 | 0 | OTHER | complex event                      |
| 3-116 | 3 | 49318433 | 49457767 | Misassembly | NONE | 49318433 | 49457767 | 0 | OTHER | complex event                      |
| 3-119 | 3 | 50358801 | 50527882 | Misassembly | NONE | 50358801 | 50527882 | 0 | OTHER | complex event                      |
| 3-120 | 3 | 50580206 | 50634910 | Misassembly | NONE | 50580206 | 50634910 | 0 | OTHER | complex event                      |
| 3-124 | 3 | 51156101 | 51371879 | Misassembly | NONE | 51156101 | 51371879 | 0 | OTHER | complex event                      |
| 3-125 | 3 | 51418334 | 51486673 | Misassembly | NONE | 51418334 | 51486673 | 0 | OTHER | complex event                      |
| 3-126 | 3 | 51531867 | 51753993 | Misassembly | NONE | 51531867 | 51753993 | 0 | OTHER | complex event                      |
| 3-128 | 3 | 52009511 | 52107689 | Misassembly | NONE | 52009511 | 52107689 | 0 | OTHER | complex event                      |
| 3-129 | 3 | 52454030 | 52608513 | Misassembly | NONE | 52454030 | 52608513 | 0 | OTHER | complex event                      |
| 3-130 | 3 | 52855931 | 53002000 | Misassembly | NONE | 52855931 | 53002000 | 0 | OTHER | complex event                      |
| 3-133 | 3 | 53655560 | 53823846 | Misassembly | NONE | 53655560 | 53823846 | 0 | OTHER | complex event                      |
| 3-134 | 3 | 53958146 | 54015222 | Misassembly | NONE | 53958146 | 54015222 | 0 | OTHER | complex event                      |
| 3-137 | 3 | 54436659 | 54553527 | Misassembly | NONE | 54436659 | 54553527 | 0 | OTHER | complex event                      |
| 3-138 | 3 | 55344170 | 55465725 | Misassembly | NONE | 55344170 | 55465725 | 0 | OTHER | complex event                      |
| 3-140 | 3 | 55780016 | 55816909 | Misassembly | NONE | 55780016 | 55816909 | 0 | OTHER | complex event                      |
| 3-144 | 3 | 57300633 | 57468767 | Misassembly | NONE | 57300633 | 57468767 | 0 | OTHER | complex event                      |
| 3-146 | 3 | 57660889 | 57772933 | Misassembly | NONE | 57660889 | 57772933 | 0 | OTHER | complex event                      |
| 3-147 | 3 | 57803249 | 57869804 | Misassembly | NONE | 57803249 | 57869804 | 0 | OTHER | complex event                      |
| 3-149 | 3 | 60999559 | 61144481 | Misassembly | NONE | 60999559 | 61144481 | 0 | OTHER | complex event                      |
| 3-150 | 3 | 61543486 | 61622799 | Misassembly | NONE | 61543486 | 61622799 | 0 | OTHER | complex event                      |
| 3-151 | 3 | 62046449 | 62282226 | Misassembly | NONE | 62046449 | 62282226 | 0 | OTHER | complex event                      |
| 3-153 | 3 | 62830958 | 62861844 | Misassembly | NONE | 62830958 | 62861844 | 0 | OTHER | complex event                      |
| 3-154 | 3 | 63424550 | 63547937 | Misassembly | NONE | 63424550 | 63547937 | 0 | OTHER | complex event                      |
| 3-156 | 3 | 63873125 | 64044705 | Misassembly | NONE | 63873125 | 64044705 | 0 | OTHER | complex event                      |
| 3-160 | 3 | 64736118 | 64845239 | Misassembly | NONE | 64736118 | 64845239 | 0 | OTHER | complex event                      |
| 3-161 | 3 | 64861524 | 65153602 | Misassembly | NONE | 64861524 | 65153602 | 0 | OTHER | complex event                      |
| 3-162 | 3 | 65220389 | 65375669 | Misassembly | NONE | 65220389 | 65375669 | 0 | OTHER | complex event                      |
| 3-164 | 3 | 65767381 | 65846048 | Misassembly | NONE | 65767381 | 65846048 | 0 | OTHER | complex event                      |
| 3-167 | 3 | 66224552 | 66254558 | Misassembly | NONE | 66224552 | 66254558 | 0 | OTHER | complex event                      |
| 3-168 | 3 | 66313970 | 66392040 | Misassembly | NONE | 66313970 | 66392040 | 0 | OTHER | complex event                      |
| 3-169 | 3 | 66554563 | 66764510 | Misassembly | NONE | 66554563 | 66764510 | 0 | OTHER | complex event                      |
| 3-170 | 3 | 67113765 | 67253488 | Misassembly | NONE | 67113765 | 67253488 | 0 | OTHER | complex event                      |
| 3-171 | 3 | 67485095 | 67783990 | Misassembly | NONE | 67485095 | 67783990 | 0 | OTHER | complex event                      |
| 3-172 | 3 | 68355604 | 68420199 | Misassembly | NONE | 68355604 | 68420199 | 0 | OTHER | complex event                      |
| 3-173 | 3 | 68865299 | 68912400 | Misassembly | NONE | 68865299 | 68912400 | 0 | OTHER | complex event                      |
| 3-174 | 3 | 68941285 | 69024409 | Misassembly | NONE | 68941285 | 69024409 | 0 | OTHER | complex event                      |
| 3-175 | 3 | 70181570 | 70220097 | Misassembly | NONE | 70181570 | 70220097 | 0 | OTHER | complex event                      |
| 3-177 | 3 | 74232710 | 74645657 | Misassembly | NONE | 74232710 | 74645657 | 0 | OTHER | complex event                      |
| 3-178 | 3 | 74726472 | 74866266 | Misassembly | NONE | 74726472 | 74866266 | 0 | OTHER | complex event                      |
| 3-182 | 3 | 76717153 | 76755419 | Misassembly | NONE | 76717153 | 76755419 | 0 | OTHER | complex event                      |
| 3-187 | 3 | 77613598 | 77748762 | Misassembly | NONE | 77613598 | 77748762 | 0 | OTHER | complex event                      |
| 3-188 | 3 | 77941042 | 78056250 | Misassembly | NONE | 77941042 | 78056250 | 0 | OTHER | complex event                      |

|       |   |           |           |             |      |           |           |   |       |               |
|-------|---|-----------|-----------|-------------|------|-----------|-----------|---|-------|---------------|
| 3-194 | 3 | 79314114  | 79349545  | Misassembly | NONE | 79314114  | 79349545  | 0 | OTHER | complex event |
| 3-195 | 3 | 79526343  | 79609475  | Misassembly | NONE | 79526343  | 79609475  | 0 | OTHER | complex event |
| 3-197 | 3 | 79685711  | 80076506  | Misassembly | NONE | 79685711  | 80076506  | 0 | OTHER | complex event |
| 3-200 | 3 | 80625527  | 80710498  | Misassembly | NONE | 80625527  | 80710498  | 0 | OTHER | complex event |
| 3-201 | 3 | 80836884  | 81037154  | Misassembly | NONE | 80836884  | 81037154  | 0 | OTHER | complex event |
| 3-202 | 3 | 81609501  | 81649062  | Misassembly | NONE | 81609501  | 81649062  | 0 | OTHER | complex event |
| 3-207 | 3 | 83882751  | 83995199  | Misassembly | NONE | 83882751  | 83995199  | 0 | OTHER | complex event |
| 3-209 | 3 | 84746904  | 85136605  | Misassembly | NONE | 84746904  | 85136605  | 0 | OTHER | complex event |
| 3-210 | 3 | 85276812  | 85373826  | Misassembly | NONE | 85276812  | 85373826  | 0 | OTHER | complex event |
| 3-213 | 3 | 85692088  | 85774553  | Misassembly | NONE | 85692088  | 85774553  | 0 | OTHER | complex event |
| 3-214 | 3 | 86220565  | 86266471  | Misassembly | NONE | 86220565  | 86266471  | 0 | OTHER | complex event |
| 3-219 | 3 | 88318149  | 88407466  | Misassembly | NONE | 88318149  | 88407466  | 0 | OTHER | complex event |
| 3-220 | 3 | 89912799  | 89958385  | Misassembly | NONE | 89912799  | 89958385  | 0 | OTHER | complex event |
| 3-222 | 3 | 90374335  | 90535205  | Misassembly | NONE | 90374335  | 90535205  | 0 | OTHER | complex event |
| 3-224 | 3 | 91080362  | 91252077  | Misassembly | NONE | 91080362  | 91252077  | 0 | OTHER | complex event |
| 3-228 | 3 | 96505639  | 96569586  | Misassembly | NONE | 96505639  | 96569586  | 0 | OTHER | complex event |
| 3-230 | 3 | 97347490  | 97557580  | Misassembly | NONE | 97347490  | 97557580  | 0 | OTHER | complex event |
| 3-231 | 3 | 98171819  | 98286921  | Misassembly | NONE | 98171819  | 98286921  | 0 | OTHER | complex event |
| 3-232 | 3 | 98511950  | 98590592  | Misassembly | NONE | 98511950  | 98590592  | 0 | OTHER | complex event |
| 3-233 | 3 | 98811634  | 98917309  | Misassembly | NONE | 98811634  | 98917309  | 0 | OTHER | complex event |
| 3-235 | 3 | 99084988  | 99230248  | Misassembly | NONE | 99084988  | 99230248  | 0 | OTHER | complex event |
| 3-237 | 3 | 99389459  | 99505817  | Misassembly | NONE | 99389459  | 99505817  | 0 | OTHER | complex event |
| 3-240 | 3 | 99863817  | 99936268  | Misassembly | NONE | 99863817  | 99936268  | 0 | OTHER | complex event |
| 3-245 | 3 | 101978345 | 102092525 | Misassembly | NONE | 101978345 | 102092525 | 0 | OTHER | complex event |
| 3-247 | 3 | 102297115 | 102326588 | Misassembly | NONE | 102297115 | 102326588 | 0 | OTHER | complex event |
| 3-248 | 3 | 102580010 | 102749882 | Misassembly | NONE | 102580010 | 102749882 | 0 | OTHER | complex event |
| 3-249 | 3 | 103069013 | 103128072 | Misassembly | NONE | 103069013 | 103128072 | 0 | OTHER | complex event |
| 3-252 | 3 | 103578895 | 103797502 | Misassembly | NONE | 103578895 | 103797502 | 0 | OTHER | complex event |
| 3-255 | 3 | 104195085 | 104617256 | Misassembly | NONE | 104195085 | 104617256 | 0 | OTHER | complex event |
| 3-256 | 3 | 104618361 | 104886668 | Misassembly | NONE | 104618361 | 104886668 | 0 | OTHER | complex event |
| 3-257 | 3 | 105440406 | 105650759 | Misassembly | NONE | 105440406 | 105650759 | 0 | OTHER | complex event |
| 3-259 | 3 | 105836265 | 106087384 | Misassembly | NONE | 105836265 | 106087384 | 0 | OTHER | complex event |
| 3-261 | 3 | 106448641 | 106511660 | Misassembly | NONE | 106448641 | 106511660 | 0 | OTHER | complex event |
| 3-262 | 3 | 106647042 | 106891519 | Misassembly | NONE | 106647042 | 106891519 | 0 | OTHER | complex event |
| 3-263 | 3 | 107041220 | 107140100 | Misassembly | NONE | 107041220 | 107140100 | 0 | OTHER | complex event |
| 3-264 | 3 | 110767971 | 111001589 | Misassembly | NONE | 110767971 | 111001589 | 0 | OTHER | complex event |
| 3-265 | 3 | 111212780 | 111241033 | Misassembly | NONE | 111212780 | 111241033 | 0 | OTHER | complex event |
| 3-267 | 3 | 111595071 | 111701888 | Misassembly | NONE | 111595071 | 111701888 | 0 | OTHER | complex event |
| 3-268 | 3 | 111751650 | 111813806 | Misassembly | NONE | 111751650 | 111813806 | 0 | OTHER | complex event |
| 3-270 | 3 | 112158624 | 112258350 | Misassembly | NONE | 112158624 | 112258350 | 0 | OTHER | complex event |
| 3-277 | 3 | 114414156 | 114693636 | Misassembly | NONE | 114414156 | 114693636 | 0 | OTHER | complex event |
| 3-280 | 3 | 115197951 | 115301112 | Misassembly | NONE | 115197951 | 115301112 | 0 | OTHER | complex event |
| 3-283 | 3 | 116985216 | 117066645 | Misassembly | NONE | 116985216 | 117066645 | 0 | OTHER | complex event |
| 3-284 | 3 | 120932521 | 120974201 | Misassembly | NONE | 120932521 | 120974201 | 0 | OTHER | complex event |
| 3-286 | 3 | 121222467 | 121293078 | Misassembly | NONE | 121222467 | 121293078 | 0 | OTHER | complex event |
| 3-288 | 3 | 121412247 | 121589924 | Misassembly | NONE | 121412247 | 121589924 | 0 | OTHER | complex event |
| 3-289 | 3 | 121796122 | 121834150 | Misassembly | NONE | 121796122 | 121834150 | 0 | OTHER | complex event |
| 3-290 | 3 | 124005635 | 124078643 | Misassembly | NONE | 124005635 | 124078643 | 0 | OTHER | complex event |
| 3-293 | 3 | 125450089 | 125489873 | Misassembly | NONE | 125450089 | 125489873 | 0 | OTHER | complex event |
| 3-295 | 3 | 125756613 | 125887349 | Misassembly | NONE | 125756613 | 125887349 | 0 | OTHER | complex event |
| 3-309 | 3 | 135000279 | 135175175 | Misassembly | NONE | 135000279 | 135175175 | 0 | OTHER | complex event |
| 3-310 | 3 | 135503666 | 135609829 | Misassembly | NONE | 135503666 | 135609829 | 0 | OTHER | complex event |
| 3-313 | 3 | 136090283 | 136209572 | Misassembly | NONE | 136090283 | 136209572 | 0 | OTHER | complex event |
| 3-316 | 3 | 136778840 | 137011019 | Misassembly | NONE | 136778840 | 137011019 | 0 | OTHER | complex event |
| 3-317 | 3 | 137111297 | 137353098 | Misassembly | NONE | 137111297 | 137353098 | 0 | OTHER | complex event |
| 3-318 | 3 | 137449147 | 137504424 | Misassembly | NONE | 137449147 | 137504424 | 0 | OTHER | complex event |
| 3-319 | 3 | 137591323 | 137708855 | Misassembly | NONE | 137591323 | 137708855 | 0 | OTHER | complex event |
| 3-324 | 3 | 138631780 | 138858360 | Misassembly | NONE | 138631780 | 138858360 | 0 | OTHER | complex event |
| 3-325 | 3 | 138901006 | 139123824 | Misassembly | NONE | 138901006 | 139123824 | 0 | OTHER | complex event |
| 3-327 | 3 | 139313720 | 139351269 | Misassembly | NONE | 139313720 | 139351269 | 0 | OTHER | complex event |
| 3-328 | 3 | 139411950 | 139485951 | Misassembly | NONE | 139411950 | 139485951 | 0 | OTHER | complex event |
| 3-329 | 3 | 139576070 | 139639254 | Misassembly | NONE | 139576070 | 139639254 | 0 | OTHER | complex event |
| 3-331 | 3 | 139830820 | 139859980 | Misassembly | NONE | 139830820 | 139859980 | 0 | OTHER | complex event |
| 3-332 | 3 | 140167386 | 140328681 | Misassembly | NONE | 140167386 | 140328681 | 0 | OTHER | complex event |
| 3-334 | 3 | 140662625 | 140855174 | Misassembly | NONE | 140662625 | 140855174 | 0 | OTHER | complex event |
| 3-335 | 3 | 141091193 | 141264408 | Misassembly | NONE | 141091193 | 141264408 | 0 | OTHER | complex event |
| 3-337 | 3 | 141325361 | 141396640 | Misassembly | NONE | 141325361 | 141396640 | 0 | OTHER | complex event |
| 3-339 | 3 | 141922520 | 142046221 | Misassembly | NONE | 141922520 | 142046221 | 0 | OTHER | complex event |
| 3-340 | 3 | 142106391 | 142275647 | Misassembly | NONE | 142106391 | 142275647 | 0 | OTHER | complex event |
| 3-341 | 3 | 142459465 | 142638986 | Misassembly | NONE | 142459465 | 142638986 | 0 | OTHER | complex event |
| 3-344 | 3 | 144100784 | 144145230 | Misassembly | NONE | 144100784 | 144145230 | 0 | OTHER | complex event |
| 3-345 | 3 | 144528586 | 144840500 | Misassembly | NONE | 144528586 | 144840500 | 0 | OTHER | complex event |
| 3-346 | 3 | 144991941 | 145040293 | Misassembly | NONE | 144991941 | 145040293 | 0 | OTHER | complex event |
| 3-350 | 3 | 147117194 | 147217950 | Misassembly | NONE | 147117194 | 147217950 | 0 | OTHER | complex event |
| 3-358 | 3 | 149624871 | 149774817 | Misassembly | NONE | 149624871 | 149774817 | 0 | OTHER | complex event |
| 3-369 | 3 | 158116963 | 158203490 | Misassembly | NONE | 158116963 | 158203490 | 0 | OTHER | complex event |
| 3-370 | 3 | 158476799 | 158518926 | Misassembly | NONE | 158476799 | 158518926 | 0 | OTHER | complex event |
| 3-371 | 3 | 160459007 | 160527298 | Misassembly | NONE | 160459007 | 160527298 | 0 | OTHER | complex event |
| 3-375 | 3 | 161130234 | 161256293 | Misassembly | NONE | 161130234 | 161256293 | 0 | OTHER | complex event |
| 3-381 | 3 | 163343259 | 163421654 | Misassembly | NONE | 163343259 | 163421654 | 0 | OTHER | complex event |
| 3-382 | 3 | 163468048 | 163591920 | Misassembly | NONE | 163468048 | 163591920 | 0 | OTHER | complex event |
| 3-383 | 3 | 163641250 | 163825625 | Misassembly | NONE | 163641250 | 163825625 | 0 | OTHER | complex event |
| 3-386 | 3 | 164212012 | 164279115 | Misassembly | NONE | 164212012 | 164279115 | 0 | OTHER | complex event |
| 3-389 | 3 | 164885184 | 165229074 | Misassembly | NONE | 164885184 | 165229074 | 0 | OTHER | complex event |
| 3-390 | 3 | 167514831 | 167582027 | Misassembly | NONE | 167514831 | 167582027 | 0 | OTHER | complex event |
| 3-399 | 3 | 173949951 | 174013340 | Misassembly | NONE | 173949951 | 174013340 | 0 | OTHER | complex event |
| 3-402 | 3 | 174643659 | 174865202 | Misassembly | NONE | 174643659 | 174865202 | 0 | OTHER | complex event |
| 3-406 | 3 | 175838138 | 175877296 | Misassembly | NONE | 175838138 | 175877296 | 0 | OTHER | complex event |
| 3-407 | 3 | 176020493 | 176137313 | Misassembly | NONE | 176020493 | 176137313 | 0 | OTHER | complex event |
| 3-409 | 3 | 176492401 | 176571824 | Misassembly | NONE | 176492401 | 176571824 | 0 | OTHER | complex event |
| 3-410 | 3 | 179237238 | 179287784 | Misassembly | NONE | 179237238 | 179287784 | 0 | OTHER | complex event |



|       |   |           |           |             |      |           |           |   |       |               |
|-------|---|-----------|-----------|-------------|------|-----------|-----------|---|-------|---------------|
| 3-412 | 3 | 181948030 | 182005816 | Misassembly | NONE | 181948030 | 182005816 | 0 | OTHER | complex event |
| 3-415 | 3 | 182528068 | 182921363 | Misassembly | NONE | 182528068 | 182921363 | 0 | OTHER | complex event |
| 3-419 | 3 | 183623869 | 183952825 | Misassembly | NONE | 183623869 | 183952825 | 0 | OTHER | complex event |
| 3-420 | 3 | 184365138 | 184482654 | Misassembly | NONE | 184365138 | 184482654 | 0 | OTHER | complex event |
| 3-421 | 3 | 184569726 | 184666585 | Misassembly | NONE | 184569726 | 184666585 | 0 | OTHER | complex event |
| 3-423 | 3 | 184860293 | 184960811 | Misassembly | NONE | 184860293 | 184960811 | 0 | OTHER | complex event |
| 3-426 | 3 | 185125832 | 185295261 | Misassembly | NONE | 185125832 | 185295261 | 0 | OTHER | complex event |
| 3-427 | 3 | 185370070 | 185429129 | Misassembly | NONE | 185370070 | 185429129 | 0 | OTHER | complex event |
| 3-428 | 3 | 185508174 | 185636205 | Misassembly | NONE | 185508174 | 185636205 | 0 | OTHER | complex event |
| 3-429 | 3 | 185779209 | 185846551 | Misassembly | NONE | 185779209 | 185846551 | 0 | OTHER | complex event |
| 3-430 | 3 | 185933031 | 185974211 | Misassembly | NONE | 185933031 | 185974211 | 0 | OTHER | complex event |
| 3-432 | 3 | 186089679 | 186221338 | Misassembly | NONE | 186089679 | 186221338 | 0 | OTHER | complex event |
| 3-433 | 3 | 186285221 | 186531627 | Misassembly | NONE | 186285221 | 186531627 | 0 | OTHER | complex event |
| 3-434 | 3 | 186667732 | 186763055 | Misassembly | NONE | 186667732 | 186763055 | 0 | OTHER | complex event |
| 3-435 | 3 | 186893361 | 187150528 | Misassembly | NONE | 186893361 | 187150528 | 0 | OTHER | complex event |
| 3-440 | 3 | 187837173 | 187876042 | Misassembly | NONE | 187837173 | 187876042 | 0 | OTHER | complex event |
| 3-441 | 3 | 188280638 | 188533778 | Misassembly | NONE | 188280638 | 188533778 | 0 | OTHER | complex event |
| 3-442 | 3 | 188679766 | 188810748 | Misassembly | NONE | 188679766 | 188810748 | 0 | OTHER | complex event |
| 3-446 | 3 | 189268683 | 189304883 | Misassembly | NONE | 189268683 | 189304883 | 0 | OTHER | complex event |
| 3-447 | 3 | 189456003 | 189525293 | Misassembly | NONE | 189456003 | 189525293 | 0 | OTHER | complex event |
| 3-451 | 3 | 194481539 | 194555073 | Misassembly | NONE | 194481539 | 194555073 | 0 | OTHER | complex event |
| 3-452 | 3 | 194692495 | 194732652 | Misassembly | NONE | 194692495 | 194732652 | 0 | OTHER | complex event |
| 3-459 | 3 | 200332398 | 200398302 | Misassembly | NONE | 200332398 | 200398302 | 0 | OTHER | complex event |
| 3-463 | 3 | 201274434 | 201321526 | Misassembly | NONE | 201274434 | 201321526 | 0 | OTHER | complex event |
| 3-464 | 3 | 201544127 | 201698074 | Misassembly | NONE | 201544127 | 201698074 | 0 | OTHER | complex event |
| 3-468 | 3 | 202354024 | 202413407 | Misassembly | NONE | 202354024 | 202413407 | 0 | OTHER | complex event |
| 3-469 | 3 | 202501675 | 202645004 | Misassembly | NONE | 202501675 | 202645004 | 0 | OTHER | complex event |
| 3-470 | 3 | 202961735 | 203069617 | Misassembly | NONE | 202961735 | 203069617 | 0 | OTHER | complex event |
| 3-471 | 3 | 203106663 | 203294796 | Misassembly | NONE | 203106663 | 203294796 | 0 | OTHER | complex event |
| 3-474 | 3 | 203647768 | 203918862 | Misassembly | NONE | 203647768 | 203918862 | 0 | OTHER | complex event |
| 3-475 | 3 | 203951807 | 204016837 | Misassembly | NONE | 203951807 | 204016837 | 0 | OTHER | complex event |
| 3-476 | 3 | 204138688 | 204424782 | Misassembly | NONE | 204138688 | 204424782 | 0 | OTHER | complex event |
| 3-479 | 3 | 205087180 | 205301854 | Misassembly | NONE | 205087180 | 205301854 | 0 | OTHER | complex event |
| 3-480 | 3 | 205454973 | 205656258 | Misassembly | NONE | 205454973 | 205656258 | 0 | OTHER | complex event |
| 3-482 | 3 | 206552297 | 206629323 | Misassembly | NONE | 206552297 | 206629323 | 0 | OTHER | complex event |
| 3-484 | 3 | 207781801 | 207837685 | Misassembly | NONE | 207781801 | 207837685 | 0 | OTHER | complex event |
| 3-485 | 3 | 208032242 | 208068827 | Misassembly | NONE | 208032242 | 208068827 | 0 | OTHER | complex event |
| 3-489 | 3 | 208403760 | 208460943 | Misassembly | NONE | 208403760 | 208460943 | 0 | OTHER | complex event |
| 3-490 | 3 | 208836850 | 208960240 | Misassembly | NONE | 208836850 | 208960240 | 0 | OTHER | complex event |
| 3-491 | 3 | 209071288 | 209141208 | Misassembly | NONE | 209071288 | 209141208 | 0 | OTHER | complex event |
| 3-492 | 3 | 209469995 | 209718913 | Misassembly | NONE | 209469995 | 209718913 | 0 | OTHER | complex event |
| 3-493 | 3 | 209832021 | 209940571 | Misassembly | NONE | 209832021 | 209940571 | 0 | OTHER | complex event |
| 3-496 | 3 | 210455041 | 210556761 | Misassembly | NONE | 210455041 | 210556761 | 0 | OTHER | complex event |
| 3-497 | 3 | 210662657 | 210721540 | Misassembly | NONE | 210662657 | 210721540 | 0 | OTHER | complex event |
| 3-498 | 3 | 210895850 | 210984650 | Misassembly | NONE | 210895850 | 210984650 | 0 | OTHER | complex event |
| 3-501 | 3 | 211842163 | 212261359 | Misassembly | NONE | 211842163 | 212261359 | 0 | OTHER | complex event |
| 3-502 | 3 | 212535172 | 212676410 | Misassembly | NONE | 212535172 | 212676410 | 0 | OTHER | complex event |
| 3-504 | 3 | 212870026 | 213123517 | Misassembly | NONE | 212870026 | 213123517 | 0 | OTHER | complex event |
| 3-505 | 3 | 213640370 | 213818257 | Misassembly | NONE | 213640370 | 213818257 | 0 | OTHER | complex event |
| 3-507 | 3 | 214138443 | 214219809 | Misassembly | NONE | 214138443 | 214219809 | 0 | OTHER | complex event |
| 3-508 | 3 | 214339581 | 214431521 | Misassembly | NONE | 214339581 | 214431521 | 0 | OTHER | complex event |
| 3-512 | 3 | 215171364 | 215270865 | Misassembly | NONE | 215171364 | 215270865 | 0 | OTHER | complex event |
| 3-513 | 3 | 215417345 | 215453590 | Misassembly | NONE | 215417345 | 215453590 | 0 | OTHER | complex event |
| 3-517 | 3 | 215890552 | 216067688 | Misassembly | NONE | 215890552 | 216067688 | 0 | OTHER | complex event |
| 3-519 | 3 | 216697652 | 216808694 | Misassembly | NONE | 216697652 | 216808694 | 0 | OTHER | complex event |
| 3-520 | 3 | 216855534 | 216901974 | Misassembly | NONE | 216855534 | 216901974 | 0 | OTHER | complex event |
| 3-522 | 3 | 217689253 | 217813452 | Misassembly | NONE | 217689253 | 217813452 | 0 | OTHER | complex event |
| 3-523 | 3 | 217851335 | 218030682 | Misassembly | NONE | 217851335 | 218030682 | 0 | OTHER | complex event |
| 3-525 | 3 | 218764554 | 219061747 | Misassembly | NONE | 218764554 | 219061747 | 0 | OTHER | complex event |
| 3-527 | 3 | 219352691 | 219514109 | Misassembly | NONE | 219352691 | 219514109 | 0 | OTHER | complex event |
| 3-531 | 3 | 220421161 | 220599780 | Misassembly | NONE | 220421161 | 220599780 | 0 | OTHER | complex event |
| 3-537 | 3 | 224005560 | 224076930 | Misassembly | NONE | 224005560 | 224076930 | 0 | OTHER | complex event |
| 3-538 | 3 | 224951190 | 225179460 | Misassembly | NONE | 224951190 | 225179460 | 0 | OTHER | complex event |
| 3-539 | 3 | 225566359 | 225599083 | Misassembly | NONE | 225566359 | 225599083 | 0 | OTHER | complex event |
| 3-540 | 3 | 225702344 | 225734642 | Misassembly | NONE | 225702344 | 225734642 | 0 | OTHER | complex event |
| 3-541 | 3 | 226249340 | 226336612 | Misassembly | NONE | 226249340 | 226336612 | 0 | OTHER | complex event |
| 3-544 | 3 | 226601998 | 226722657 | Misassembly | NONE | 226601998 | 226722657 | 0 | OTHER | complex event |
| 3-546 | 3 | 227100028 | 227243918 | Misassembly | NONE | 227100028 | 227243918 | 0 | OTHER | complex event |
| 3-548 | 3 | 227891732 | 228173262 | Misassembly | NONE | 227891732 | 228173262 | 0 | OTHER | complex event |
| 3-549 | 3 | 228198451 | 228447041 | Misassembly | NONE | 228198451 | 228447041 | 0 | OTHER | complex event |
| 3-553 | 3 | 228911061 | 229019615 | Misassembly | NONE | 228911061 | 229019615 | 0 | OTHER | complex event |
| 4-2   | 4 | 5121548   | 5403592   | Misassembly | NONE | 5121548   | 5403592   | 0 | OTHER | complex event |
| 4-4   | 4 | 5475537   | 5599723   | Misassembly | NONE | 5475537   | 5599723   | 0 | OTHER | complex event |
| 4-8   | 4 | 6233455   | 6290809   | Misassembly | NONE | 6233455   | 6290809   | 0 | OTHER | complex event |
| 4-10  | 4 | 6557744   | 6586837   | Misassembly | NONE | 6557744   | 6586837   | 0 | OTHER | complex event |
| 4-12  | 4 | 6722284   | 6837219   | Misassembly | NONE | 6722284   | 6837219   | 0 | OTHER | complex event |
| 4-13  | 4 | 6938790   | 7029034   | Misassembly | NONE | 6938790   | 7029034   | 0 | OTHER | complex event |
| 4-14  | 4 | 7087553   | 7147173   | Misassembly | NONE | 7087553   | 7147173   | 0 | OTHER | complex event |
| 4-15  | 4 | 7186732   | 7289072   | Misassembly | NONE | 7186732   | 7289072   | 0 | OTHER | complex event |
| 4-16  | 4 | 7358969   | 7416409   | Misassembly | NONE | 7358969   | 7416409   | 0 | OTHER | complex event |
| 4-17  | 4 | 7437851   | 7522123   | Misassembly | NONE | 7437851   | 7522123   | 0 | OTHER | complex event |
| 4-18  | 4 | 7576204   | 7842642   | Misassembly | NONE | 7576204   | 7842642   | 0 | OTHER | complex event |
| 4-21  | 4 | 8261179   | 8501011   | Misassembly | NONE | 8261179   | 8501011   | 0 | OTHER | complex event |
| 4-22  | 4 | 8532506   | 8757876   | Misassembly | NONE | 8532506   | 8757876   | 0 | OTHER | complex event |
| 4-23  | 4 | 8931173   | 9238630   | Misassembly | NONE | 8931173   | 9238630   | 0 | OTHER | complex event |
| 4-25  | 4 | 9379709   | 9554182   | Misassembly | NONE | 9379709   | 9554182   | 0 | OTHER | complex event |
| 4-29  | 4 | 10920829  | 11147614  | Misassembly | NONE | 10920829  | 11147614  | 0 | OTHER | complex event |
| 4-31  | 4 | 11387661  | 11483901  | Misassembly | NONE | 11387661  | 11483901  | 0 | OTHER | complex event |
| 4-32  | 4 | 11529706  | 11649342  | Misassembly | NONE | 11529706  | 11649342  | 0 | OTHER | complex event |
| 4-33  | 4 | 11876514  | 11961435  | Misassembly | NONE | 11876514  | 11961435  | 0 | OTHER | complex event |
| 4-34  | 4 | 12027123  | 12194184  | Misassembly | NONE | 12027123  | 12194184  | 0 | OTHER | complex event |

|       |   |          |          |             |      |          |          |   |       |                    |
|-------|---|----------|----------|-------------|------|----------|----------|---|-------|--------------------|
| 4-35  | 4 | 12257425 | 12349527 | Misassembly | NONE | 12257425 | 12349527 | 0 | OTHER | complex event      |
| 4-38  | 4 | 13870346 | 13944280 | Misassembly | NONE | 13870346 | 13944280 | 0 | OTHER | complex event      |
| 4-39  | 4 | 14921834 | 15088744 | Misassembly | NONE | 14921834 | 15088744 | 0 | OTHER | complex event      |
| 4-40  | 4 | 15217136 | 15337805 | Misassembly | NONE | 15217136 | 15337805 | 0 | OTHER | complex event      |
| 4-42  | 4 | 18009224 | 18135633 | Misassembly | NONE | 18009224 | 18135633 | 0 | OTHER | complex event      |
| 4-45  | 4 | 18331112 | 18361091 | Misassembly | NONE | 18331112 | 18361091 | 0 | OTHER | complex event      |
| 4-47  | 4 | 18463596 | 18567566 | Misassembly | NONE | 18463596 | 18567566 | 0 | OTHER | complex event      |
| 4-50  | 4 | 19112396 | 19219888 | Misassembly | NONE | 19112396 | 19219888 | 0 | OTHER | complex event      |
| 4-51  | 4 | 19533832 | 19808218 | Misassembly | NONE | 19533832 | 19808218 | 0 | OTHER | complex event      |
| 4-54  | 4 | 20755155 | 21068126 | Misassembly | NONE | 20755155 | 21068126 | 0 | OTHER | complex event      |
| 4-56  | 4 | 23216321 | 23380709 | Misassembly | NONE | 23216321 | 23380709 | 0 | OTHER | complex event      |
| 4-58  | 4 | 25618267 | 25650814 | Misassembly | NONE | 25618267 | 25650814 | 0 | OTHER | complex event      |
| 4-65  | 4 | 29949803 | 30028188 | Misassembly | NONE | 29949803 | 30028188 | 0 | OTHER | complex event      |
| 4-66  | 4 | 30153892 | 30427841 | Misassembly | NONE | 30153892 | 30427841 | 0 | OTHER | complex event      |
| 4-67  | 4 | 30467041 | 30611541 | Misassembly | NONE | 30467041 | 30611541 | 0 | OTHER | complex event      |
| 4-68  | 4 | 30664837 | 30708383 | Misassembly | NONE | 30664837 | 30708383 | 0 | OTHER | complex event      |
| 4-69  | 4 | 30755835 | 30856394 | Misassembly | NONE | 30755835 | 30856394 | 0 | OTHER | complex event      |
| 4-71  | 4 | 32435164 | 32493715 | Misassembly | NONE | 32435164 | 32493715 | 0 | OTHER | complex event      |
| 4-72  | 4 | 32553173 | 32694750 | Misassembly | NONE | 32553173 | 32694750 | 0 | OTHER | complex event      |
| 4-73  | 4 | 36128992 | 36172265 | Misassembly | NONE | 36128992 | 36172265 | 0 | OTHER | complex event      |
| 4-74  | 4 | 36372570 | 36650050 | Misassembly | NONE | 36372570 | 36650050 | 0 | OTHER | complex event      |
| 4-77  | 4 | 37060935 | 37258191 | Misassembly | NONE | 37060935 | 37258191 | 0 | OTHER | complex event      |
| 4-80  | 4 | 37802274 | 37851808 | Misassembly | NONE | 37802274 | 37851808 | 0 | OTHER | complex event      |
| 4-81  | 4 | 38029597 | 38117642 | Misassembly | NONE | 38029597 | 38117642 | 0 | OTHER | complex event      |
| 4-85  | 4 | 38882684 | 38969375 | Misassembly | NONE | 38882684 | 38969375 | 0 | OTHER | complex event      |
| 4-86  | 4 | 39583674 | 39674402 | Misassembly | NONE | 39583674 | 39674402 | 0 | OTHER | complex event      |
| 4-88  | 4 | 41439318 | 41483502 | Misassembly | NONE | 41439318 | 41483502 | 0 | OTHER | complex event      |
| 4-90  | 4 | 41807233 | 41883137 | Misassembly | NONE | 41807233 | 41883137 | 0 | OTHER | complex event      |
| 4-94  | 4 | 42166813 | 42217384 | Misassembly | NONE | 42166813 | 42217384 | 0 | OTHER | complex event      |
| 4-95  | 4 | 42241651 | 42314714 | Misassembly | NONE | 42241651 | 42314714 | 0 | OTHER | complex event      |
| 4-97  | 4 | 42588815 | 42733964 | Misassembly | NONE | 42588815 | 42733964 | 0 | OTHER | complex event      |
| 4-98  | 4 | 42925556 | 42995697 | Misassembly | NONE | 42925556 | 42995697 | 0 | OTHER | complex event      |
| 4-99  | 4 | 43170641 | 43221152 | Misassembly | NONE | 43170641 | 43221152 | 0 | OTHER | complex event      |
| 4-102 | 4 | 43474995 | 43499457 | Misassembly | NONE | 43474995 | 43499457 | 0 | OTHER | complex event      |
| 4-103 | 4 | 43565708 | 43599205 | Misassembly | NONE | 43565708 | 43599205 | 0 | OTHER | complex event      |
| 4-105 | 4 | 46199929 | 46491101 | Misassembly | NONE | 46199929 | 46491101 | 0 | OTHER | complex event      |
| 4-106 | 4 | 47715614 | 47807720 | Misassembly | NONE | 47715614 | 47807720 | 0 | OTHER | complex event      |
| 4-113 | 4 | 49745056 | 49920728 | Misassembly | NONE | 49745056 | 49920728 | 0 | OTHER | complex event      |
| 4-117 | 4 | 51502508 | 51943790 | Misassembly | NONE | 51502508 | 51943790 | 0 | OTHER | complex event      |
| 4-118 | 4 | 52200586 | 52271628 | Misassembly | NONE | 52200586 | 52271628 | 0 | OTHER | complex event      |
| 4-120 | 4 | 52410510 | 52496881 | Misassembly | NONE | 52410510 | 52496881 | 0 | OTHER | complex event      |
| 4-124 | 4 | 53521804 | 53824675 | Misassembly | NONE | 53521804 | 53824675 | 0 | OTHER | complex event      |
| 4-126 | 4 | 54105397 | 54199752 | Misassembly | NONE | 54105397 | 54199752 | 0 | OTHER | complex event      |
| 4-128 | 4 | 54397015 | 54744064 | Misassembly | NONE | 54397015 | 54744064 | 0 | OTHER | complex event      |
| 4-129 | 4 | 55193875 | 55311226 | Misassembly | NONE | 55193875 | 55311226 | 0 | OTHER | complex event      |
| 4-133 | 4 | 60309434 | 60406440 | Misassembly | NONE | 60309434 | 60406440 | 0 | OTHER | complex event      |
| 4-135 | 4 | 60590438 | 60750093 | Misassembly | NONE | 60590438 | 60750093 | 0 | OTHER | complex event      |
| 4-137 | 4 | 60793943 | 60857347 | Misassembly | NONE | 60793943 | 60857347 | 0 | OTHER | complex event      |
| 4-138 | 4 | 61548157 | 61621476 | Misassembly | NONE | 61548157 | 61621476 | 0 | OTHER | complex event      |
| 4-139 | 4 | 61695419 | 62055429 | Misassembly | NONE | 61695419 | 62055429 | 0 | OTHER | complex event      |
| 4-141 | 4 | 62192814 | 62685708 | Misassembly | NONE | 62192814 | 62685708 | 0 | OTHER | complex event      |
| 4-143 | 4 | 62985649 | 63725889 | Misassembly | NONE | 62985649 | 63725889 | 0 | OTHER | complex event      |
| 4-148 | 4 | 64484843 | 64564368 | Misassembly | NONE | 64484843 | 64564368 | 0 | OTHER | complex event      |
| 4-152 | 4 | 67689203 | 67726196 | Misassembly | NONE | 67689203 | 67726196 | 0 | OTHER | complex event      |
| 4-153 | 4 | 67847073 | 68092211 | Misassembly | NONE | 67847073 | 68092211 | 0 | OTHER | complex event      |
| 4-155 | 4 | 68632027 | 68723990 | Misassembly | NONE | 68632027 | 68723990 | 0 | OTHER | complex event      |
| 4-156 | 4 | 68840637 | 68890307 | Misassembly | NONE | 68840637 | 68890307 | 0 | OTHER | complex event      |
| 4-160 | 4 | 69370536 | 69443116 | Misassembly | NONE | 69370536 | 69443116 | 0 | OTHER | complex event      |
| 4-161 | 4 | 69479017 | 69601523 | Misassembly | NONE | 69479017 | 69601523 | 0 | OTHER | complex event      |
| 4-162 | 4 | 69650375 | 69736165 | Misassembly | NONE | 69650375 | 69736165 | 0 | OTHER | complex event      |
| 4-163 | 4 | 70227728 | 70567357 | Misassembly | NONE | 70227728 | 70567357 | 0 | OTHER | complex event      |
| 4-164 | 4 | 70653496 | 70730527 | Misassembly | NONE | 70653496 | 70730527 | 0 | OTHER | complex event      |
| 4-165 | 4 | 70836008 | 71160792 | Misassembly | NONE | 70836008 | 71160792 | 0 | OTHER | complex event      |
| 4-166 | 4 | 71270792 | 71302407 | Misassembly | NONE | 71270792 | 71302407 | 0 | OTHER | complex event      |
| 4-167 | 4 | 71362438 | 71467068 | Misassembly | NONE | 71362438 | 71467068 | 0 | OTHER | complex event      |
| 4-168 | 4 | 71548950 | 71915285 | Misassembly | NONE | 71548950 | 71915285 | 0 | OTHER | complex event      |
| 4-170 | 4 | 72371925 | 72511336 | Misassembly | NONE | 72371925 | 72511336 | 0 | OTHER | complex event      |
| 4-171 | 4 | 72619940 | 72728627 | Misassembly | NONE | 72619940 | 72728627 | 0 | OTHER | complex event      |
| 4-172 | 4 | 72769012 | 72911400 | Misassembly | NONE | 72769012 | 72911400 | 0 | OTHER | complex event      |
| 4-173 | 4 | 73078570 | 73192422 | Misassembly | NONE | 73078570 | 73192422 | 0 | OTHER | complex event      |
| 4-175 | 4 | 73546079 | 73820514 | Misassembly | NONE | 73546079 | 73820514 | 0 | OTHER | complex event      |
| 4-178 | 4 | 76115569 | 76191069 | Misassembly | NONE | 76115569 | 76191069 | 0 | OTHER | complex event      |
| 4-180 | 4 | 76576519 | 76742304 | Misassembly | NONE | 76576519 | 76742304 | 0 | OTHER | complex event      |
| 4-181 | 4 | 76866229 | 77126264 | Misassembly | NONE | 76866229 | 77126264 | 0 | OTHER | complex event      |
| 4-183 | 4 | 77677088 | 77767910 | Misassembly | NONE | 77677088 | 77767910 | 0 | OTHER | complex event      |
| 4-184 | 4 | 77843280 | 77896792 | Misassembly | NONE | 77843280 | 77896792 | 0 | OTHER | complex event      |
| 4-185 | 4 | 79345191 | 79469473 | Misassembly | NONE | 79345191 | 79469473 | 0 | OTHER | complex event      |
| 4-186 | 4 | 79747073 | 79777050 | Misassembly | NONE | 79747073 | 79777050 | 0 | OTHER | possible inversion |
| 4-188 | 4 | 80089192 | 80187682 | Misassembly | NONE | 80089192 | 80187682 | 0 | OTHER | complex event      |
| 4-189 | 4 | 80298948 | 80447945 | Misassembly | NONE | 80298948 | 80447945 | 0 | OTHER | complex event      |
| 4-191 | 4 | 80658093 | 80729437 | Misassembly | NONE | 80658093 | 80729437 | 0 | OTHER | complex event      |
| 4-194 | 4 | 81214317 | 81263110 | Misassembly | NONE | 81214317 | 81263110 | 0 | OTHER | complex event      |
| 4-195 | 4 | 81392625 | 81513155 | Misassembly | NONE | 81392625 | 81513155 | 0 | OTHER | complex event      |
| 4-198 | 4 | 82230527 | 82297094 | Misassembly | NONE | 82230527 | 82297094 | 0 | OTHER | complex event      |
| 4-199 | 4 | 82392308 | 82455405 | Misassembly | NONE | 82392308 | 82455405 | 0 | OTHER | complex event      |
| 4-203 | 4 | 83252987 | 83328920 | Misassembly | NONE | 83252987 | 83328920 | 0 | OTHER | complex event      |
| 4-204 | 4 | 83669346 | 83717531 | Misassembly | NONE | 83669346 | 83717531 | 0 | OTHER | complex event      |
| 4-205 | 4 | 83856638 | 84105038 | Misassembly | NONE | 83856638 | 84105038 | 0 | OTHER | complex event      |
| 4-209 | 4 | 84910852 | 85318502 | Misassembly | NONE | 84910852 | 85318502 | 0 | OTHER | complex event      |

|       |   |           |           |              |      |           |           |   |       |                             |
|-------|---|-----------|-----------|--------------|------|-----------|-----------|---|-------|-----------------------------|
| 4-210 | 4 | 85454721  | 85576081  | Misassembled | NONE | 85454721  | 85576081  | 0 | OTHER | complex event               |
| 4-212 | 4 | 85950643  | 86032463  | Misassembled | NONE | 85950643  | 86032463  | 0 | OTHER | complex event               |
| 4-214 | 4 | 86121473  | 86238880  | Misassembled | NONE | 86121473  | 86238880  | 0 | OTHER | complex event               |
| 4-217 | 4 | 86743271  | 86820412  | Misassembled | NONE | 86743271  | 86820412  | 0 | OTHER | complex event               |
| 4-218 | 4 | 86871807  | 86972395  | Misassembled | NONE | 86871807  | 86972395  | 0 | OTHER | complex event               |
| 4-220 | 4 | 87323390  | 87506860  | Misassembled | NONE | 87323390  | 87506860  | 0 | OTHER | complex event               |
| 4-221 | 4 | 87860209  | 87941275  | Misassembled | NONE | 87860209  | 87941275  | 0 | OTHER | complex event               |
| 4-225 | 4 | 88390093  | 88503467  | Misassembled | NONE | 88390093  | 88503467  | 0 | OTHER | complex event               |
| 4-226 | 4 | 88733983  | 88766084  | Misassembled | NONE | 88733983  | 88766084  | 0 | OTHER | complex event               |
| 4-227 | 4 | 88924279  | 88998205  | Misassembled | NONE | 88924279  | 88998205  | 0 | OTHER | complex event               |
| 4-229 | 4 | 89316824  | 89512480  | Misassembled | NONE | 89316824  | 89512480  | 0 | OTHER | complex event               |
| 4-230 | 4 | 89710529  | 89792133  | Misassembled | NONE | 89710529  | 89792133  | 0 | OTHER | complex event               |
| 4-231 | 4 | 89962534  | 90306575  | Misassembled | NONE | 89962534  | 90306575  | 0 | OTHER | complex event               |
| 4-232 | 4 | 90707505  | 90753246  | Misassembled | NONE | 90707505  | 90753246  | 0 | OTHER | complex event               |
| 4-233 | 4 | 90959045  | 91125449  | Misassembled | NONE | 90959045  | 91125449  | 0 | OTHER | complex event               |
| 4-235 | 4 | 91771992  | 91921298  | Misassembled | NONE | 91771992  | 91921298  | 0 | OTHER | complex event               |
| 4-238 | 4 | 92389508  | 92519189  | Misassembled | NONE | 92389508  | 92519189  | 0 | OTHER | complex event               |
| 4-239 | 4 | 92612614  | 92658192  | Misassembled | NONE | 92612614  | 92658192  | 0 | OTHER | complex event               |
| 4-240 | 4 | 93133806  | 93208216  | Misassembled | NONE | 93133806  | 93208216  | 0 | OTHER | complex event               |
| 4-245 | 4 | 94737948  | 94774009  | Misassembled | NONE | 94737948  | 94774009  | 0 | OTHER | complex event               |
| 4-246 | 4 | 94844510  | 94986480  | Misassembled | NONE | 94844510  | 94986480  | 0 | OTHER | complex event               |
| 4-247 | 4 | 95121160  | 95381832  | Misassembled | NONE | 95121160  | 95381832  | 0 | OTHER | complex event               |
| 4-253 | 4 | 96580176  | 96645878  | Misassembled | NONE | 96580176  | 96645878  | 0 | OTHER | complex event               |
| 4-254 | 4 | 96964426  | 97080227  | Misassembled | NONE | 96964426  | 97080227  | 0 | OTHER | complex event               |
| 4-256 | 4 | 98024002  | 98147612  | Misassembled | NONE | 98024002  | 98147612  | 0 | OTHER | complex event with deletion |
| 4-257 | 4 | 98271179  | 98288494  | Misassembled | NONE | 98271179  | 98288494  | 0 | OTHER | complex event               |
| 4-258 | 4 | 98780135  | 98842872  | Misassembled | NONE | 98780135  | 98842872  | 0 | OTHER | complex event               |
| 4-261 | 4 | 100145647 | 100400771 | Misassembled | NONE | 100145647 | 100400771 | 0 | OTHER | complex event               |
| 4-263 | 4 | 100766983 | 100883249 | Misassembled | NONE | 100766983 | 100883249 | 0 | OTHER | complex event               |
| 4-268 | 4 | 101276575 | 101483289 | Misassembled | NONE | 101276575 | 101483289 | 0 | OTHER | complex event               |
| 4-269 | 4 | 101558210 | 101696454 | Misassembled | NONE | 101558210 | 101696454 | 0 | OTHER | complex event               |
| 4-270 | 4 | 101951322 | 102289189 | Misassembled | NONE | 101951322 | 102289189 | 0 | OTHER | complex event               |
| 4-271 | 4 | 102050685 | 102704174 | Misassembled | NONE | 102050685 | 102704174 | 0 | OTHER | complex event               |
| 4-273 | 4 | 103180352 | 103238914 | Misassembled | NONE | 103180352 | 103238914 | 0 | OTHER | complex event               |
| 4-278 | 4 | 106926303 | 107023410 | Misassembled | NONE | 106926303 | 107023410 | 0 | OTHER | complex event               |
| 4-279 | 4 | 107592267 | 107729303 | Misassembled | NONE | 107592267 | 107729303 | 0 | OTHER | complex event               |
| 4-281 | 4 | 109593734 | 109656363 | Misassembled | NONE | 109593734 | 109656363 | 0 | OTHER | complex event               |
| 4-283 | 4 | 110785052 | 110934656 | Misassembled | NONE | 110785052 | 110934656 | 0 | OTHER | complex event               |
| 4-286 | 4 | 111418413 | 111543906 | Misassembled | NONE | 111418413 | 111543906 | 0 | OTHER | complex event               |
| 4-287 | 4 | 111719496 | 111923580 | Misassembled | NONE | 111719496 | 111923580 | 0 | OTHER | complex event               |
| 4-288 | 4 | 112351588 | 112546313 | Misassembled | NONE | 112351588 | 112546313 | 0 | OTHER | complex event               |
| 4-289 | 4 | 112773218 | 112979193 | Misassembled | NONE | 112773218 | 112979193 | 0 | OTHER | complex event               |
| 4-291 | 4 | 113197177 | 113373089 | Misassembled | NONE | 113197177 | 113373089 | 0 | OTHER | complex event               |
| 4-292 | 4 | 113626696 | 113825360 | Misassembled | NONE | 113626696 | 113825360 | 0 | OTHER | complex event               |
| 4-294 | 4 | 114124126 | 114260152 | Misassembled | NONE | 114124126 | 114260152 | 0 | OTHER | complex event               |
| 4-295 | 4 | 114339313 | 114386018 | Misassembled | NONE | 114339313 | 114386018 | 0 | OTHER | complex event               |
| 4-297 | 4 | 114944202 | 115090960 | Misassembled | NONE | 114944202 | 115090960 | 0 | OTHER | complex event               |
| 4-300 | 4 | 116473291 | 116554509 | Misassembled | NONE | 116473291 | 116554509 | 0 | OTHER | complex event               |
| 4-302 | 4 | 117020938 | 117185339 | Misassembled | NONE | 117020938 | 117185339 | 0 | OTHER | complex event               |
| 4-303 | 4 | 117810170 | 117886196 | Misassembled | NONE | 117810170 | 117886196 | 0 | OTHER | complex event               |
| 4-304 | 4 | 118026846 | 118115338 | Misassembled | NONE | 118026846 | 118115338 | 0 | OTHER | complex event               |
| 4-305 | 4 | 118131558 | 118196294 | Misassembled | NONE | 118131558 | 118196294 | 0 | OTHER | complex event               |
| 4-306 | 4 | 118333069 | 118524906 | Misassembled | NONE | 118333069 | 118524906 | 0 | OTHER | complex event               |
| 4-307 | 4 | 119544268 | 119874813 | Misassembled | NONE | 119544268 | 119874813 | 0 | OTHER | complex event               |
| 4-308 | 4 | 119994459 | 120060817 | Misassembled | NONE | 119994459 | 120060817 | 0 | OTHER | complex event               |
| 4-310 | 4 | 120270843 | 120382042 | Misassembled | NONE | 120270843 | 120382042 | 0 | OTHER | complex event               |
| 4-311 | 4 | 120478040 | 120558884 | Misassembled | NONE | 120478040 | 120558884 | 0 | OTHER | complex event               |
| 4-312 | 4 | 120627623 | 120813136 | Misassembled | NONE | 120627623 | 120813136 | 0 | OTHER | complex event               |
| 4-316 | 4 | 121763645 | 121842422 | Misassembled | NONE | 121763645 | 121842422 | 0 | OTHER | complex event               |
| 4-317 | 4 | 122312108 | 122548199 | Misassembled | NONE | 122312108 | 122548199 | 0 | OTHER | complex event               |
| 4-318 | 4 | 122567825 | 122773942 | Misassembled | NONE | 122567825 | 122773942 | 0 | OTHER | complex event               |
| 4-320 | 4 | 122940654 | 123280121 | Misassembled | NONE | 122940654 | 123280121 | 0 | OTHER | complex event               |
| 4-324 | 4 | 124061190 | 124269865 | Misassembled | NONE | 124061190 | 124269865 | 0 | OTHER | complex event               |
| 4-328 | 4 | 133850556 | 133901667 | Misassembled | NONE | 133850556 | 133901667 | 0 | OTHER | complex event               |
| 4-329 | 4 | 133924666 | 134066769 | Misassembled | NONE | 133924666 | 134066769 | 0 | OTHER | complex event               |
| 4-331 | 4 | 134602336 | 135001497 | Misassembled | NONE | 134602336 | 135001497 | 0 | OTHER | complex event               |
| 4-332 | 4 | 135347546 | 135390185 | Misassembled | NONE | 135347546 | 135390185 | 0 | OTHER | complex event               |
| 4-334 | 4 | 135684515 | 135923411 | Misassembled | NONE | 135684515 | 135923411 | 0 | OTHER | complex event               |
| 4-335 | 4 | 136045159 | 136117465 | Misassembled | NONE | 136045159 | 136117465 | 0 | OTHER | complex event               |
| 4-336 | 4 | 136181751 | 136229899 | Misassembled | NONE | 136181751 | 136229899 | 0 | OTHER | complex event               |
| 4-338 | 4 | 136478083 | 136626609 | Misassembled | NONE | 136478083 | 136626609 | 0 | OTHER | complex event               |
| 4-339 | 4 | 136846899 | 136917821 | Misassembled | NONE | 136846899 | 136917821 | 0 | OTHER | complex event               |
| 4-345 | 4 | 138473964 | 138543462 | Misassembled | NONE | 138473964 | 138543462 | 0 | OTHER | complex event               |
| 4-346 | 4 | 139478996 | 139776450 | Misassembled | NONE | 139478996 | 139776450 | 0 | OTHER | complex event               |
| 4-347 | 4 | 139922802 | 140068022 | Misassembled | NONE | 139922802 | 140068022 | 0 | OTHER | complex event               |
| 4-350 | 4 | 140418037 | 140485729 | Misassembled | NONE | 140418037 | 140485729 | 0 | OTHER | complex event               |
| 4-351 | 4 | 140645838 | 140927017 | Misassembled | NONE | 140645838 | 140927017 | 0 | OTHER | complex event               |
| 4-352 | 4 | 141058632 | 141146212 | Misassembled | NONE | 141058632 | 141146212 | 0 | OTHER | complex event               |
| 4-353 | 4 | 141276446 | 141346012 | Misassembled | NONE | 141276446 | 141346012 | 0 | OTHER | complex event               |
| 4-355 | 4 | 142128085 | 142165896 | Misassembled | NONE | 142128085 | 142165896 | 0 | OTHER | complex event               |
| 4-357 | 4 | 142578966 | 142918864 | Misassembled | NONE | 142578966 | 142918864 | 0 | OTHER | complex event               |
| 4-358 | 4 | 143331734 | 143496167 | Misassembled | NONE | 143331734 | 143496167 | 0 | OTHER | complex event               |
| 4-359 | 4 | 143558589 | 143597756 | Misassembled | NONE | 143558589 | 143597756 | 0 | OTHER | possible inversion          |
| 4-361 | 4 | 143922501 | 144100330 | Misassembled | NONE | 143922501 | 144100330 | 0 | OTHER | complex event               |
| 4-362 | 4 | 144246402 | 144460886 | Misassembled | NONE | 144246402 | 144460886 | 0 | OTHER | complex event               |
| 4-363 | 4 | 144806496 | 144908407 | Misassembled | NONE | 144806496 | 144908407 | 0 | OTHER | complex event               |
| 4-364 | 4 | 145488791 | 145651071 | Misassembled | NONE | 145488791 | 145651071 | 0 | OTHER | complex event               |
| 4-366 | 4 | 145836221 | 145932663 | Misassembled | NONE | 145836221 | 145932663 | 0 | OTHER | complex event               |

|       |   |           |           |             |      |           |           |   |       |                    |
|-------|---|-----------|-----------|-------------|------|-----------|-----------|---|-------|--------------------|
| 4-368 | 4 | 146048090 | 146181648 | Misassembly | NONE | 146048090 | 146181648 | 0 | OTHER | complex event      |
| 4-369 | 4 | 146279955 | 146406756 | Misassembly | NONE | 146279955 | 146406756 | 0 | OTHER | possible inversion |
| 4-374 | 4 | 150571867 | 150760897 | Misassembly | NONE | 150571867 | 150760897 | 0 | OTHER | complex event      |
| 4-377 | 4 | 152994357 | 153294607 | Misassembly | NONE | 152994357 | 153294607 | 0 | OTHER | complex event      |
| 4-382 | 4 | 155501687 | 155738684 | Misassembly | NONE | 155501687 | 155738684 | 0 | OTHER | complex event      |
| 4-383 | 4 | 155839302 | 155990156 | Misassembly | NONE | 155839302 | 155990156 | 0 | OTHER | complex event      |
| 4-384 | 4 | 156017965 | 156054365 | Misassembly | NONE | 156017965 | 156054365 | 0 | OTHER | complex event      |
| 4-385 | 4 | 156124293 | 156223108 | Misassembly | NONE | 156124293 | 156223108 | 0 | OTHER | complex event      |
| 4-387 | 4 | 156762999 | 156839854 | Misassembly | NONE | 156762999 | 156839854 | 0 | OTHER | complex event      |
| 4-389 | 4 | 156965413 | 157038299 | Misassembly | NONE | 156965413 | 157038299 | 0 | OTHER | complex event      |
| 4-390 | 4 | 157174700 | 157445814 | Misassembly | NONE | 157174700 | 157445814 | 0 | OTHER | complex event      |
| 4-392 | 4 | 157753538 | 157853953 | Misassembly | NONE | 157753538 | 157853953 | 0 | OTHER | complex event      |
| 4-395 | 4 | 158392455 | 158581180 | Misassembly | NONE | 158392455 | 158581180 | 0 | OTHER | complex event      |
| 4-397 | 4 | 158839114 | 158932700 | Misassembly | NONE | 158839114 | 158932700 | 0 | OTHER | complex event      |
| 4-398 | 4 | 158974688 | 159108885 | Misassembly | NONE | 158974688 | 159108885 | 0 | OTHER | complex event      |
| 4-400 | 4 | 159208355 | 159275698 | Misassembly | NONE | 159208355 | 159275698 | 0 | OTHER | complex event      |
| 4-403 | 4 | 159773379 | 159965098 | Misassembly | NONE | 159773379 | 159965098 | 0 | OTHER | complex event      |
| 4-404 | 4 | 159997238 | 160040344 | Misassembly | NONE | 159997238 | 160040344 | 0 | OTHER | complex event      |
| 4-407 | 4 | 160253646 | 160364627 | Misassembly | NONE | 160253646 | 160364627 | 0 | OTHER | complex event      |
| 4-408 | 4 | 160587124 | 160644868 | Misassembly | NONE | 160587124 | 160644868 | 0 | OTHER | complex event      |
| 4-409 | 4 | 160843544 | 161043058 | Misassembly | NONE | 160843544 | 161043058 | 0 | OTHER | complex event      |
| 4-411 | 4 | 161230472 | 161518783 | Misassembly | NONE | 161230472 | 161518783 | 0 | OTHER | complex event      |
| 4-412 | 4 | 161759126 | 161826624 | Misassembly | NONE | 161759126 | 161826624 | 0 | OTHER | complex event      |
| 4-414 | 4 | 161992434 | 162192107 | Misassembly | NONE | 161992434 | 162192107 | 0 | OTHER | complex event      |
| 4-416 | 4 | 162304571 | 162341482 | Misassembly | NONE | 162304571 | 162341482 | 0 | OTHER | complex event      |
| 4-418 | 4 | 162528029 | 162631181 | Misassembly | NONE | 162528029 | 162631181 | 0 | OTHER | complex event      |
| 4-420 | 4 | 163213989 | 163351393 | Misassembly | NONE | 163213989 | 163351393 | 0 | OTHER | complex event      |
| 4-421 | 4 | 163459565 | 163677598 | Misassembly | NONE | 163459565 | 163677598 | 0 | OTHER | complex event      |
| 4-422 | 4 | 163785639 | 163828241 | Misassembly | NONE | 163785639 | 163828241 | 0 | OTHER | complex event      |
| 4-424 | 4 | 164077581 | 164124612 | Misassembly | NONE | 164077581 | 164124612 | 0 | OTHER | complex event      |
| 4-426 | 4 | 164500431 | 164706314 | Misassembly | NONE | 164500431 | 164706314 | 0 | OTHER | complex event      |
| 4-428 | 4 | 165161878 | 165273233 | Misassembly | NONE | 165161878 | 165273233 | 0 | OTHER | complex event      |
| 4-429 | 4 | 165533682 | 165610933 | Misassembly | NONE | 165533682 | 165610933 | 0 | OTHER | complex event      |
| 4-430 | 4 | 166247167 | 166274995 | Misassembly | NONE | 166247167 | 166274995 | 0 | OTHER | complex event      |
| 4-431 | 4 | 166318864 | 166447169 | Misassembly | NONE | 166318864 | 166447169 | 0 | OTHER | complex event      |
| 4-434 | 4 | 166961134 | 167097218 | Misassembly | NONE | 166961134 | 167097218 | 0 | OTHER | complex event      |
| 4-435 | 4 | 167151123 | 167254778 | Misassembly | NONE | 167151123 | 167254778 | 0 | OTHER | complex event      |
| 4-436 | 4 | 167743296 | 167817981 | Misassembly | NONE | 167743296 | 167817981 | 0 | OTHER | complex event      |
| 4-437 | 4 | 167951865 | 168072920 | Misassembly | NONE | 167951865 | 168072920 | 0 | OTHER | complex event      |
| 4-442 | 4 | 168696189 | 168803351 | Misassembly | NONE | 168696189 | 168803351 | 0 | OTHER | complex event      |
| 4-443 | 4 | 168852003 | 168999957 | Misassembly | NONE | 168852003 | 168999957 | 0 | OTHER | complex event      |
| 4-444 | 4 | 169287162 | 169334011 | Misassembly | NONE | 169287162 | 169334011 | 0 | OTHER | complex event      |
| 4-446 | 4 | 169549557 | 169597150 | Misassembly | NONE | 169549557 | 169597150 | 0 | OTHER | complex event      |
| 4-447 | 4 | 169717370 | 169872615 | Misassembly | NONE | 169717370 | 169872615 | 0 | OTHER | complex event      |
| 4-448 | 4 | 170161495 | 170286552 | Misassembly | NONE | 170161495 | 170286552 | 0 | OTHER | complex event      |
| 4-452 | 4 | 172765783 | 172868437 | Misassembly | NONE | 172765783 | 172868437 | 0 | OTHER | complex event      |
| 4-453 | 4 | 173144057 | 173204622 | Misassembly | NONE | 173144057 | 173204622 | 0 | OTHER | complex event      |
| 4-454 | 4 | 173310552 | 173679824 | Misassembly | NONE | 173310552 | 173679824 | 0 | OTHER | complex event      |
| 4-455 | 4 | 173707462 | 173769956 | Misassembly | NONE | 173707462 | 173769956 | 0 | OTHER | complex event      |
| 4-457 | 4 | 174060033 | 174194722 | Misassembly | NONE | 174060033 | 174194722 | 0 | OTHER | complex event      |
| 4-459 | 4 | 174517601 | 174568328 | Misassembly | NONE | 174517601 | 174568328 | 0 | OTHER | complex event      |
| 4-463 | 4 | 174997804 | 175049057 | Misassembly | NONE | 174997804 | 175049057 | 0 | OTHER | complex event      |
| 4-465 | 4 | 175245386 | 17547956  | Misassembly | NONE | 175245386 | 17547956  | 0 | OTHER | complex event      |
| 4-467 | 4 | 175985523 | 176019917 | Misassembly | NONE | 175985523 | 176019917 | 0 | OTHER | complex event      |
| 4-470 | 4 | 181808894 | 181869926 | Misassembly | NONE | 181808894 | 181869926 | 0 | OTHER | complex event      |
| 4-472 | 4 | 182505879 | 182573432 | Misassembly | NONE | 182505879 | 182573432 | 0 | OTHER | complex event      |
| 4-473 | 4 | 182610146 | 182795912 | Misassembly | NONE | 182610146 | 182795912 | 0 | OTHER | complex event      |
| 4-474 | 4 | 182870899 | 182994282 | Misassembly | NONE | 182870899 | 182994282 | 0 | OTHER | complex event      |
| 4-476 | 4 | 183557381 | 183597631 | Misassembly | NONE | 183557381 | 183597631 | 0 | OTHER | complex event      |
| 4-477 | 4 | 183641250 | 183731938 | Misassembly | NONE | 183641250 | 183731938 | 0 | OTHER | complex event      |
| 4-479 | 4 | 185787654 | 185915266 | Misassembly | NONE | 185787654 | 185915266 | 0 | OTHER | complex event      |
| 4-480 | 4 | 185957783 | 186030559 | Misassembly | NONE | 185957783 | 186030559 | 0 | OTHER | complex event      |
| 4-483 | 4 | 186742700 | 186911676 | Misassembly | NONE | 186742700 | 186911676 | 0 | OTHER | complex event      |
| 4-485 | 4 | 188067010 | 188143665 | Misassembly | NONE | 188067010 | 188143665 | 0 | OTHER | complex event      |
| 4-487 | 4 | 189525776 | 189614309 | Misassembly | NONE | 189525776 | 189614309 | 0 | OTHER | complex event      |
| 4-488 | 4 | 189667012 | 189764007 | Misassembly | NONE | 189667012 | 189764007 | 0 | OTHER | complex event      |
| 4-491 | 4 | 190420076 | 190535941 | Misassembly | NONE | 190420076 | 190535941 | 0 | OTHER | complex event      |
| 4-492 | 4 | 190743297 | 190830867 | Misassembly | NONE | 190743297 | 190830867 | 0 | OTHER | complex event      |
| 4-493 | 4 | 191139349 | 191227931 | Misassembly | NONE | 191139349 | 191227931 | 0 | OTHER | complex event      |
| 4-494 | 4 | 191579148 | 191632309 | Misassembly | NONE | 191579148 | 191632309 | 0 | OTHER | complex event      |
| 4-496 | 4 | 191944044 | 192134389 | Misassembly | NONE | 191944044 | 192134389 | 0 | OTHER | complex event      |
| 4-497 | 4 | 192189455 | 192272138 | Misassembly | NONE | 192189455 | 192272138 | 0 | OTHER | complex event      |
| 4-498 | 4 | 192465564 | 192555518 | Misassembly | NONE | 192465564 | 192555518 | 0 | OTHER | complex event      |
| 4-499 | 4 | 192718449 | 192824416 | Misassembly | NONE | 192718449 | 192824416 | 0 | OTHER | complex event      |
| 4-501 | 4 | 196165878 | 196279043 | Misassembly | NONE | 196165878 | 196279043 | 0 | OTHER | complex event      |
| 4-503 | 4 | 197953949 | 198008255 | Misassembly | NONE | 197953949 | 198008255 | 0 | OTHER | complex event      |
| 4-504 | 4 | 198045462 | 198172305 | Misassembly | NONE | 198045462 | 198172305 | 0 | OTHER | complex event      |
| 4-507 | 4 | 198705962 | 198767183 | Misassembly | NONE | 198705962 | 198767183 | 0 | OTHER | complex event      |
| 4-508 | 4 | 198812179 | 198925830 | Misassembly | NONE | 198812179 | 198925830 | 0 | OTHER | complex event      |
| 4-509 | 4 | 199293569 | 199501176 | Misassembly | NONE | 199293569 | 199501176 | 0 | OTHER | complex event      |
| 4-510 | 4 | 199531821 | 200006804 | Misassembly | NONE | 199531821 | 200006804 | 0 | OTHER | complex event      |
| 4-513 | 4 | 200870246 | 200955728 | Misassembly | NONE | 200870246 | 200955728 | 0 | OTHER | complex event      |
| 4-514 | 4 | 201121593 | 201264389 | Misassembly | NONE | 201121593 | 201264389 | 0 | OTHER | complex event      |
| 4-515 | 4 | 201360959 | 201510402 | Misassembly | NONE | 201360959 | 201510402 | 0 | OTHER | complex event      |
| 4-517 | 4 | 201921743 | 202007231 | Misassembly | NONE | 201921743 | 202007231 | 0 | OTHER | complex event      |
| 4-519 | 4 | 202289452 | 202528888 | Misassembly | NONE | 202289452 | 202528888 | 0 | OTHER | complex event      |
| 4-521 | 4 | 202811477 | 203025326 | Misassembly | NONE | 202811477 | 203025326 | 0 | OTHER | complex event      |
| 4-524 | 4 | 203556120 | 203644400 | Misassembly | NONE | 203556120 | 203644400 | 0 | OTHER | complex event      |
| 4-525 | 4 | 203721535 | 203753011 | Misassembly | NONE | 203721535 | 203753011 | 0 | OTHER | complex event      |

|       |   |           |           |             |      |           |           |   |       |                                    |
|-------|---|-----------|-----------|-------------|------|-----------|-----------|---|-------|------------------------------------|
| 4-527 | 4 | 203965981 | 204207261 | Misassembly | NONE | 203965981 | 204207261 | 0 | OTHER | complex event                      |
| 4-528 | 4 | 204280277 | 204476221 | Misassembly | NONE | 204280277 | 204476221 | 0 | OTHER | complex event                      |
| 4-529 | 4 | 204545880 | 204601813 | Misassembly | NONE | 204545880 | 204601813 | 0 | OTHER | complex event                      |
| 4-530 | 4 | 204601813 | 204676170 | Misassembly | NONE | 204601813 | 204676170 | 0 | OTHER | complex event                      |
| 4-531 | 4 | 205055066 | 205108244 | Misassembly | NONE | 205055066 | 205108244 | 0 | OTHER | complex event                      |
| 4-533 | 4 | 205391316 | 205476815 | Misassembly | NONE | 205391316 | 205476815 | 0 | OTHER | complex event                      |
| 4-535 | 4 | 205642862 | 205690571 | Misassembly | NONE | 205642862 | 205690571 | 0 | OTHER | complex event                      |
| 4-536 | 4 | 205803852 | 205840891 | Misassembly | NONE | 205803852 | 205840891 | 0 | OTHER | complex event                      |
| 4-541 | 4 | 206816588 | 207202753 | Misassembly | NONE | 206816588 | 207202753 | 0 | OTHER | complex event                      |
| 4-542 | 4 | 207305689 | 207492095 | Misassembly | NONE | 207305689 | 207492095 | 0 | OTHER | complex event                      |
| 4-546 | 4 | 208402557 | 208480679 | Misassembly | NONE | 208402557 | 208480679 | 0 | OTHER | complex event                      |
| 4-547 | 4 | 208609833 | 208875887 | Misassembly | NONE | 208609833 | 208875887 | 0 | OTHER | complex event                      |
| 4-549 | 4 | 209236777 | 209300285 | Misassembly | NONE | 209236777 | 209300285 | 0 | OTHER | complex event                      |
| 4-550 | 4 | 209601068 | 209673926 | Misassembly | NONE | 209601068 | 209673926 | 0 | OTHER | complex event                      |
| 4-551 | 4 | 210193631 | 210294646 | Misassembly | NONE | 210193631 | 210294646 | 0 | OTHER | complex event                      |
| 4-552 | 4 | 210363059 | 210532353 | Misassembly | NONE | 210363059 | 210532353 | 0 | OTHER | complex event                      |
| 4-553 | 4 | 210706397 | 210830787 | Misassembly | NONE | 210706397 | 210830787 | 0 | OTHER | complex event                      |
| 4-554 | 4 | 210949403 | 211044092 | Misassembly | NONE | 210949403 | 211044092 | 0 | OTHER | complex event                      |
| 4-555 | 4 | 211112319 | 211350527 | Misassembly | NONE | 211112319 | 211350527 | 0 | OTHER | complex event                      |
| 4-556 | 4 | 211720284 | 211984445 | Misassembly | NONE | 211720284 | 211984445 | 0 | OTHER | complex event                      |
| 4-557 | 4 | 212087707 | 212141790 | Misassembly | NONE | 212087707 | 212141790 | 0 | OTHER | complex event                      |
| 4-559 | 4 | 212661939 | 212737869 | Misassembly | NONE | 212661939 | 212737869 | 0 | OTHER | complex event                      |
| 4-561 | 4 | 213053643 | 213190266 | Misassembly | NONE | 213053643 | 213190266 | 0 | OTHER | complex event                      |
| 4-563 | 4 | 213437362 | 213482730 | Misassembly | NONE | 213437362 | 213482730 | 0 | OTHER | complex event                      |
| 4-564 | 4 | 213840505 | 213977313 | Misassembly | NONE | 213840505 | 213977313 | 0 | OTHER | complex event                      |
| 4-565 | 4 | 214043509 | 214166842 | Misassembly | NONE | 214043509 | 214166842 | 0 | OTHER | complex event                      |
| 4-566 | 4 | 214293223 | 214422704 | Misassembly | NONE | 214293223 | 214422704 | 0 | OTHER | complex event                      |
| 4-567 | 4 | 214501403 | 214864319 | Misassembly | NONE | 214501403 | 214864319 | 0 | OTHER | complex event                      |
| 4-569 | 4 | 215203950 | 215424514 | Misassembly | NONE | 215203950 | 215424514 | 0 | OTHER | complex event                      |
| 4-571 | 4 | 215604881 | 215686180 | Misassembly | NONE | 215604881 | 215686180 | 0 | OTHER | complex event                      |
| 4-572 | 4 | 216333791 | 216412580 | Misassembly | NONE | 216333791 | 216412580 | 0 | OTHER | complex event                      |
| 4-573 | 4 | 216490220 | 216564958 | Misassembly | NONE | 216490220 | 216564958 | 0 | OTHER | complex event                      |
| 4-576 | 4 | 216994211 | 217075649 | Misassembly | NONE | 216994211 | 217075649 | 0 | OTHER | complex event                      |
| 4-577 | 4 | 217134655 | 217208436 | Misassembly | NONE | 217134655 | 217208436 | 0 | OTHER | complex event                      |
| 4-580 | 4 | 218984462 | 219036543 | Misassembly | NONE | 218984462 | 219036543 | 0 | OTHER | complex event                      |
| 4-583 | 4 | 220116118 | 220506375 | Misassembly | NONE | 220116118 | 220506375 | 0 | OTHER | complex event                      |
| 4-588 | 4 | 221789088 | 221894072 | Misassembly | NONE | 221789088 | 221894072 | 0 | OTHER | complex event                      |
| 4-591 | 4 | 222257955 | 222419193 | Misassembly | NONE | 222257955 | 222419193 | 0 | OTHER | complex event                      |
| 4-595 | 4 | 222901096 | 222990751 | Misassembly | NONE | 222901096 | 222990751 | 0 | OTHER | complex event                      |
| 4-597 | 4 | 223419900 | 223524129 | Misassembly | NONE | 223419900 | 223524129 | 0 | OTHER | complex event                      |
| 4-603 | 4 | 224140852 | 224176650 | Misassembly | NONE | 224140852 | 224176650 | 0 | OTHER | complex event                      |
| 4-604 | 4 | 224511933 | 224599894 | Misassembly | NONE | 224511933 | 224599894 | 0 | OTHER | complex event                      |
| 4-611 | 4 | 225320840 | 225458653 | Misassembly | NONE | 225320840 | 225458653 | 0 | OTHER | complex event                      |
| 4-613 | 4 | 225575358 | 225791563 | Misassembly | NONE | 225575358 | 225791563 | 0 | OTHER | complex event                      |
| 4-616 | 4 | 226267628 | 226349235 | Misassembly | NONE | 226267628 | 226349235 | 0 | OTHER | complex event                      |
| 4-623 | 4 | 227011116 | 227142769 | Misassembly | NONE | 227011116 | 227142769 | 0 | OTHER | complex event                      |
| 4-624 | 4 | 227379917 | 227586653 | Misassembly | NONE | 227379917 | 227586653 | 0 | OTHER | complex event                      |
| 4-626 | 4 | 227854471 | 227950686 | Misassembly | NONE | 227854471 | 227950686 | 0 | OTHER | complex event                      |
| 4-629 | 4 | 231287375 | 231397754 | Misassembly | NONE | 231287375 | 231397754 | 0 | OTHER | complex event                      |
| 4-630 | 4 | 231557236 | 231681499 | Misassembly | NONE | 231557236 | 231681499 | 0 | OTHER | complex event                      |
| 4-631 | 4 | 231833733 | 231897826 | Misassembly | NONE | 231833733 | 231897826 | 0 | OTHER | complex event                      |
| 4-632 | 4 | 232040034 | 232095150 | Misassembly | NONE | 232040034 | 232095150 | 0 | OTHER | complex event                      |
| 4-633 | 4 | 232375717 | 232468077 | Misassembly | NONE | 232375717 | 232468077 | 0 | OTHER | complex event                      |
| 4-634 | 4 | 232510763 | 232658486 | Misassembly | NONE | 232510763 | 232658486 | 0 | OTHER | complex event                      |
| 4-638 | 4 | 233440415 | 233562996 | Misassembly | NONE | 233440415 | 233562996 | 0 | OTHER | complex event                      |
| 4-639 | 4 | 233599099 | 233707817 | Misassembly | NONE | 233599099 | 233707817 | 0 | OTHER | complex event                      |
| 4-640 | 4 | 233821577 | 233932570 | Misassembly | NONE | 233821577 | 233932570 | 0 | OTHER | complex event                      |
| 4-644 | 4 | 234416799 | 234466355 | Misassembly | NONE | 234416799 | 234466355 | 0 | OTHER | complex event                      |
| 4-645 | 4 | 234501070 | 234699982 | Misassembly | NONE | 234501070 | 234699982 | 0 | OTHER | complex event                      |
| 4-647 | 4 | 235053066 | 235306394 | Misassembly | NONE | 235053066 | 235306394 | 0 | OTHER | complex event                      |
| 4-648 | 4 | 235342184 | 235410855 | Misassembly | NONE | 235342184 | 235410855 | 0 | OTHER | complex event                      |
| 4-650 | 4 | 235618226 | 235677562 | Misassembly | NONE | 235618226 | 235677562 | 0 | OTHER | complex event                      |
| 4-651 | 4 | 235677562 | 235829618 | Misassembly | NONE | 235677562 | 235829618 | 0 | OTHER | complex event                      |
| 4-653 | 4 | 236853687 | 237043051 | Misassembly | NONE | 236853687 | 237043051 | 0 | OTHER | complex event                      |
| 4-654 | 4 | 237318931 | 237576942 | Misassembly | NONE | 237318931 | 237576942 | 0 | OTHER | complex event                      |
| 4-655 | 4 | 237795270 | 237902410 | Misassembly | NONE | 237795270 | 237902410 | 0 | OTHER | complex event                      |
| 4-657 | 4 | 238751597 | 238796651 | Misassembly | NONE | 238751597 | 238796651 | 0 | OTHER | complex event                      |
| 4-658 | 4 | 239217899 | 239411325 | Misassembly | NONE | 239217899 | 239411325 | 0 | OTHER | complex event                      |
| 4-659 | 4 | 239538265 | 239711539 | Misassembly | NONE | 239538265 | 239711539 | 0 | OTHER | complex event                      |
| 4-660 | 4 | 239780930 | 239905132 | Misassembly | NONE | 239780930 | 239905132 | 0 | OTHER | complex event                      |
| 4-662 | 4 | 242569386 | 242651369 | Misassembly | NONE | 242569386 | 242651369 | 0 | OTHER | complex event                      |
| 4-664 | 4 | 243071385 | 243097083 | Misassembly | NONE | 243071385 | 243097083 | 0 | OTHER | complex event                      |
| 4-665 | 4 | 243346228 | 243368769 | Misassembly | NONE | 243346228 | 243368769 | 0 | OTHER | complex event                      |
| 4-666 | 4 | 243473677 | 243700733 | Misassembly | NONE | 243473677 | 243700733 | 0 | OTHER | complex event                      |
| 4-669 | 4 | 244268079 | 244369844 | Misassembly | NONE | 244268079 | 244369844 | 0 | OTHER | complex event                      |
| 4-670 | 4 | 244446003 | 244484709 | Misassembly | NONE | 244446003 | 244484709 | 0 | OTHER | complex event                      |
| 4-671 | 4 | 244565862 | 244890781 | Misassembly | NONE | 244565862 | 244890781 | 0 | OTHER | complex event                      |
| 4-672 | 4 | 244970560 | 245020425 | Misassembly | NONE | 244970560 | 245020425 | 0 | OTHER | complex event                      |
| 5-1   | 5 | 675017    | 750713    | Misassembly | NONE | 675017    | 750713    | 0 | OTHER | complex event                      |
| 5-2   | 5 | 817865    | 873794    | Misassembly | NONE | 817865    | 873794    | 0 | OTHER | complex event                      |
| 5-3   | 5 | 990299    | 1432877   | Misassembly | NONE | 990299    | 1432877   | 0 | OTHER | complex event                      |
| 5-5   | 5 | 1628737   | 1702020   | Misassembly | NONE | 1628737   | 1702020   | 0 | OTHER | complex event                      |
| 5-7   | 5 | 1917066   | 2086918   | Misassembly | NONE | 1917066   | 2086918   | 0 | OTHER | complex event                      |
| 5-9   | 5 | 2404985   | 2472226   | Misassembly | NONE | 2404985   | 2472226   | 0 | OTHER | complex event                      |
| 5-10  | 5 | 2628193   | 2733466   | Misassembly | NONE | 2628193   | 2733466   | 0 | OTHER | complex event                      |
| 5-11  | 5 | 2833386   | 2940293   | Misassembly | NONE | 2833386   | 2940293   | 0 | OTHER | complex event                      |
| 5-12  | 5 | 3005457   | 3034495   | Misassembly | NONE | 3005457   | 3034495   | 0 | OTHER | complex event - possible inversion |
| 5-13  | 5 | 3062763   | 3154273   | Misassembly | NONE | 3062763   | 3154273   | 0 | OTHER | complex event                      |
| 5-14  | 5 | 3440951   | 3645534   | Misassembly | NONE | 3440951   | 3645534   | 0 | OTHER | complex event                      |

|       |   |          |          |             |      |          |          |   |       |                                    |
|-------|---|----------|----------|-------------|------|----------|----------|---|-------|------------------------------------|
| 5-15  | 5 | 3798596  | 3914267  | Misassembly | NONE | 3798596  | 3914267  | 0 | OTHER | complex event                      |
| 5-17  | 5 | 4366555  | 4390911  | Misassembly | NONE | 4366555  | 4390911  | 0 | OTHER | complex event                      |
| 5-18  | 5 | 4466582  | 4562364  | Misassembly | NONE | 4466582  | 4562364  | 0 | OTHER | complex event - part 1 of 2        |
| 5-19  | 5 | 4562364  | 4678814  | Misassembly | NONE | 4562364  | 4678814  | 0 | OTHER | complex event - part 2 of 2        |
| 5-23  | 5 | 5241344  | 5306379  | Misassembly | NONE | 5241344  | 5306379  | 0 | OTHER | complex event - possible inversion |
| 5-26  | 5 | 5894810  | 6136813  | Misassembly | NONE | 5894810  | 6136813  | 0 | OTHER | complex event                      |
| 5-28  | 5 | 7129593  | 7285709  | Misassembly | NONE | 7129593  | 7285709  | 0 | OTHER | complex event                      |
| 5-29  | 5 | 7858118  | 7932627  | Misassembly | NONE | 7858118  | 7932627  | 0 | OTHER | complex event                      |
| 5-31  | 5 | 8187323  | 8314120  | Misassembly | NONE | 8187323  | 8314120  | 0 | OTHER | complex event                      |
| 5-32  | 5 | 8453132  | 8611152  | Misassembly | NONE | 8453132  | 8611152  | 0 | OTHER | complex event - possible inversion |
| 5-33  | 5 | 8611152  | 8740503  | Misassembly | NONE | 8611152  | 8740503  | 0 | OTHER | complex event                      |
| 5-34  | 5 | 8797406  | 8850597  | Misassembly | NONE | 8797406  | 8850597  | 0 | OTHER | complex event                      |
| 5-35  | 5 | 9047202  | 9097523  | Misassembly | NONE | 9047202  | 9097523  | 0 | OTHER | complex event                      |
| 5-37  | 5 | 9288582  | 9474780  | Misassembly | NONE | 9288582  | 9474780  | 0 | OTHER | complex event                      |
| 5-39  | 5 | 9935572  | 10009819 | Misassembly | NONE | 9935572  | 10009819 | 0 | OTHER | complex event                      |
| 5-41  | 5 | 10258558 | 10405656 | Misassembly | NONE | 10258558 | 10405656 | 0 | OTHER | complex event                      |
| 5-42  | 5 | 10489852 | 10748239 | Misassembly | NONE | 10489852 | 10748239 | 0 | OTHER | complex event                      |
| 5-44  | 5 | 11181371 | 11683914 | Misassembly | NONE | 11181371 | 11683914 | 0 | OTHER | complex event                      |
| 5-45  | 5 | 11995509 | 12140700 | Misassembly | NONE | 11995509 | 12140700 | 0 | OTHER | complex event                      |
| 5-46  | 5 | 12252182 | 12589515 | Misassembly | NONE | 12252182 | 12589515 | 0 | OTHER | complex event                      |
| 5-47  | 5 | 12819623 | 12941486 | Misassembly | NONE | 12819623 | 12941486 | 0 | OTHER | complex event                      |
| 5-48  | 5 | 13048592 | 13281128 | Misassembly | NONE | 13048592 | 13281128 | 0 | OTHER | complex event                      |
| 5-50  | 5 | 16845892 | 16932198 | Misassembly | NONE | 16845892 | 16932198 | 0 | OTHER | complex event                      |
| 5-51  | 5 | 18057346 | 18112741 | Misassembly | NONE | 18057346 | 18112741 | 0 | OTHER | complex event                      |
| 5-53  | 5 | 18714847 | 18840340 | Misassembly | NONE | 18714847 | 18840340 | 0 | OTHER | complex event                      |
| 5-54  | 5 | 19163197 | 19304523 | Misassembly | NONE | 19163197 | 19304523 | 0 | OTHER | complex event                      |
| 5-55  | 5 | 19640408 | 19697063 | Misassembly | NONE | 19640408 | 19697063 | 0 | OTHER | complex event - possible inversion |
| 5-57  | 5 | 23486879 | 23646704 | Misassembly | NONE | 23486879 | 23646704 | 0 | OTHER | complex event                      |
| 5-58  | 5 | 25685666 | 25820070 | Misassembly | NONE | 25685666 | 25820070 | 0 | OTHER | complex event                      |
| 5-59  | 5 | 25893142 | 25936379 | Misassembly | NONE | 25893142 | 25936379 | 0 | OTHER | complex event                      |
| 5-60  | 5 | 29124522 | 29211561 | Misassembly | NONE | 29124522 | 29211561 | 0 | OTHER | complex event                      |
| 5-61  | 5 | 30216673 | 30317764 | Misassembly | NONE | 30216673 | 30317764 | 0 | OTHER | complex event                      |
| 5-62  | 5 | 30464929 | 30550161 | Misassembly | NONE | 30464929 | 30550161 | 0 | OTHER | complex event                      |
| 5-64  | 5 | 31239702 | 31470356 | Misassembly | NONE | 31239702 | 31470356 | 0 | OTHER | complex event                      |
| 5-65  | 5 | 31533114 | 31792021 | Misassembly | NONE | 31533114 | 31792021 | 0 | OTHER | complex event                      |
| 5-66  | 5 | 31851812 | 31940749 | Misassembly | NONE | 31851812 | 31940749 | 0 | OTHER | complex event                      |
| 5-67  | 5 | 32009511 | 32173180 | Misassembly | NONE | 32009511 | 32173180 | 0 | OTHER | complex event                      |
| 5-68  | 5 | 32226146 | 32370711 | Misassembly | NONE | 32226146 | 32370711 | 0 | OTHER | complex event                      |
| 5-70  | 5 | 32628007 | 32718375 | Misassembly | NONE | 32628007 | 32718375 | 0 | OTHER | complex event - possible inversion |
| 5-71  | 5 | 32768071 | 33202356 | Misassembly | NONE | 32768071 | 33202356 | 0 | OTHER | complex event                      |
| 5-73  | 5 | 33856761 | 33956125 | Misassembly | NONE | 33856761 | 33956125 | 0 | OTHER | complex event                      |
| 5-74  | 5 | 34015560 | 34078326 | Misassembly | NONE | 34015560 | 34078326 | 0 | OTHER | complex event                      |
| 5-77  | 5 | 34391813 | 34403336 | Misassembly | NONE | 34391813 | 34403336 | 0 | OTHER | complex event                      |
| 5-78  | 5 | 34436496 | 34641654 | Misassembly | NONE | 34436496 | 34641654 | 0 | OTHER | complex event                      |
| 5-79  | 5 | 34971623 | 35017738 | Misassembly | NONE | 34971623 | 35017738 | 0 | OTHER | complex event                      |
| 5-80  | 5 | 35094991 | 35228282 | Misassembly | NONE | 35094991 | 35228282 | 0 | OTHER | complex event                      |
| 5-81  | 5 | 35592421 | 35718972 | Misassembly | NONE | 35592421 | 35718972 | 0 | OTHER | complex event                      |
| 5-83  | 5 | 35973312 | 36056159 | Misassembly | NONE | 35973312 | 36056159 | 0 | OTHER | complex event                      |
| 5-84  | 5 | 36624830 | 36691459 | Misassembly | NONE | 36624830 | 36691459 | 0 | OTHER | complex event                      |
| 5-85  | 5 | 36793888 | 37032542 | Misassembly | NONE | 36793888 | 37032542 | 0 | OTHER | complex event                      |
| 5-86  | 5 | 37279512 | 37464457 | Misassembly | NONE | 37279512 | 37464457 | 0 | OTHER | complex event                      |
| 5-87  | 5 | 37657014 | 37872290 | Misassembly | NONE | 37657014 | 37872290 | 0 | OTHER | complex event                      |
| 5-90  | 5 | 38820932 | 38931579 | Misassembly | NONE | 38820932 | 38931579 | 0 | OTHER | complex event                      |
| 5-91  | 5 | 39132039 | 39170900 | Misassembly | NONE | 39132039 | 39170900 | 0 | OTHER | complex event                      |
| 5-93  | 5 | 39749757 | 39892095 | Misassembly | NONE | 39749757 | 39892095 | 0 | OTHER | complex event                      |
| 5-96  | 5 | 40482844 | 40599362 | Misassembly | NONE | 40482844 | 40599362 | 0 | OTHER | complex event                      |
| 5-97  | 5 | 40928608 | 40981033 | Misassembly | NONE | 40928608 | 40981033 | 0 | OTHER | complex event                      |
| 5-98  | 5 | 41492590 | 41659256 | Misassembly | NONE | 41492590 | 41659256 | 0 | OTHER | complex event                      |
| 5-99  | 5 | 41959918 | 42021050 | Misassembly | NONE | 41959918 | 42021050 | 0 | OTHER | complex event                      |
| 5-101 | 5 | 42553472 | 42807028 | Misassembly | NONE | 42553472 | 42807028 | 0 | OTHER | complex event                      |
| 5-102 | 5 | 43389953 | 43416279 | Misassembly | NONE | 43389953 | 43416279 | 0 | OTHER | complex event - possible inversion |
| 5-106 | 5 | 44855518 | 44888513 | Misassembly | NONE | 44855518 | 44888513 | 0 | OTHER | complex event - possible inversion |
| 5-109 | 5 | 45891646 | 46110445 | Misassembly | NONE | 45891646 | 46110445 | 0 | OTHER | complex event                      |
| 5-111 | 5 | 47978642 | 48097422 | Misassembly | NONE | 47978642 | 48097422 | 0 | OTHER | complex event                      |
| 5-113 | 5 | 48429842 | 48550078 | Misassembly | NONE | 48429842 | 48550078 | 0 | OTHER | complex event                      |
| 5-114 | 5 | 48735173 | 48829074 | Misassembly | NONE | 48735173 | 48829074 | 0 | OTHER | complex event                      |
| 5-115 | 5 | 48876937 | 49135774 | Misassembly | NONE | 48876937 | 49135774 | 0 | OTHER | complex event                      |
| 5-116 | 5 | 49247883 | 49327168 | Misassembly | NONE | 49247883 | 49327168 | 0 | OTHER | complex event                      |
| 5-117 | 5 | 49585506 | 49838908 | Misassembly | NONE | 49585506 | 49838908 | 0 | OTHER | complex event                      |
| 5-118 | 5 | 50189074 | 50566613 | Misassembly | NONE | 50189074 | 50566613 | 0 | OTHER | complex event                      |
| 5-119 | 5 | 50636963 | 50652384 | Misassembly | NONE | 50636963 | 50652384 | 0 | OTHER | complex event                      |
| 5-120 | 5 | 50888147 | 51173543 | Misassembly | NONE | 50888147 | 51173543 | 0 | OTHER | complex event                      |
| 5-122 | 5 | 51498573 | 51528966 | Misassembly | NONE | 51498573 | 51528966 | 0 | OTHER | complex event                      |
| 5-123 | 5 | 51617923 | 51695156 | Misassembly | NONE | 51617923 | 51695156 | 0 | OTHER | complex event                      |
| 5-125 | 5 | 52142377 | 52274350 | Misassembly | NONE | 52142377 | 52274350 | 0 | OTHER | complex event                      |
| 5-127 | 5 | 52575373 | 52775755 | Misassembly | NONE | 52575373 | 52775755 | 0 | OTHER | complex event                      |
| 5-128 | 5 | 53085231 | 53056131 | Misassembly | NONE | 53085231 | 53056131 | 0 | OTHER | complex event                      |

|       |   |          |          |             |      |          |          |   |       |                                    |
|-------|---|----------|----------|-------------|------|----------|----------|---|-------|------------------------------------|
| 5-129 | 5 | 53661035 | 53933450 | Misassembly | NONE | 53661035 | 53933450 | 0 | OTHER | complex event                      |
| 5-130 | 5 | 53996326 | 54105564 | Misassembly | NONE | 53996326 | 54105564 | 0 | OTHER | complex event                      |
| 5-131 | 5 | 54555455 | 54641120 | Misassembly | NONE | 54555455 | 54641120 | 0 | OTHER | complex event                      |
| 5-132 | 5 | 54841463 | 55033348 | Misassembly | NONE | 54841463 | 55033348 | 0 | OTHER | complex event                      |
| 5-134 | 5 | 55142850 | 55463966 | Misassembly | NONE | 55142850 | 55463966 | 0 | OTHER | complex event                      |
| 5-135 | 5 | 55629023 | 55717449 | Misassembly | NONE | 55629023 | 55717449 | 0 | OTHER | complex event                      |
| 5-137 | 5 | 55779595 | 55915644 | Misassembly | NONE | 55779595 | 55915644 | 0 | OTHER | complex event - possible inversion |
| 5-139 | 5 | 56318571 | 56484997 | Misassembly | NONE | 56318571 | 56484997 | 0 | OTHER | complex event                      |
| 5-140 | 5 | 56561299 | 56671007 | Misassembly | NONE | 56561299 | 56671007 | 0 | OTHER | complex event                      |
| 5-142 | 5 | 56746206 | 56840869 | Misassembly | NONE | 56746206 | 56840869 | 0 | OTHER | complex event                      |
| 5-143 | 5 | 56884588 | 56964125 | Misassembly | NONE | 56884588 | 56964125 | 0 | OTHER | complex event                      |
| 5-148 | 5 | 57711377 | 57745743 | Misassembly | NONE | 57711377 | 57745743 | 0 | OTHER | complex event - possible inversion |
| 5-149 | 5 | 57858075 | 58139901 | Misassembly | NONE | 57858075 | 58139901 | 0 | OTHER | complex event                      |
| 5-150 | 5 | 58446811 | 58554150 | Misassembly | NONE | 58446811 | 58554150 | 0 | OTHER | complex event                      |
| 5-151 | 5 | 58903963 | 59212170 | Misassembly | NONE | 58903963 | 59212170 | 0 | OTHER | complex event                      |
| 5-152 | 5 | 59687504 | 60000646 | Misassembly | NONE | 59687504 | 60000646 | 0 | OTHER | complex event                      |
| 5-157 | 5 | 64612523 | 64701380 | Misassembly | NONE | 64612523 | 64701380 | 0 | OTHER | complex event                      |
| 5-165 | 5 | 67086935 | 67176408 | Misassembly | NONE | 67086935 | 67176408 | 0 | OTHER | complex event                      |
| 5-166 | 5 | 67215545 | 67314361 | Misassembly | NONE | 67215545 | 67314361 | 0 | OTHER | complex event                      |
| 5-168 | 5 | 69509864 | 69607770 | Misassembly | NONE | 69509864 | 69607770 | 0 | OTHER | complex event                      |
| 5-169 | 5 | 69847503 | 69930808 | Misassembly | NONE | 69847503 | 69930808 | 0 | OTHER | complex event                      |
| 5-170 | 5 | 70096215 | 70238305 | Misassembly | NONE | 70096215 | 70238305 | 0 | OTHER | complex event                      |
| 5-171 | 5 | 70277246 | 70429234 | Misassembly | NONE | 70277246 | 70429234 | 0 | OTHER | complex event                      |
| 5-172 | 5 | 70528231 | 70591285 | Misassembly | NONE | 70528231 | 70591285 | 0 | OTHER | complex event                      |
| 5-173 | 5 | 70813271 | 71182609 | Misassembly | NONE | 70813271 | 71182609 | 0 | OTHER | complex event                      |
| 5-174 | 5 | 71247779 | 71339671 | Misassembly | NONE | 71247779 | 71339671 | 0 | OTHER | complex event                      |
| 5-175 | 5 | 71530756 | 71825517 | Misassembly | NONE | 71530756 | 71825517 | 0 | OTHER | complex event                      |
| 5-176 | 5 | 71995612 | 72194579 | Misassembly | NONE | 71995612 | 72194579 | 0 | OTHER | complex event                      |
| 5-177 | 5 | 72241196 | 72286190 | Misassembly | NONE | 72241196 | 72286190 | 0 | OTHER | complex event                      |
| 5-181 | 5 | 72823402 | 73130792 | Misassembly | NONE | 72823402 | 73130792 | 0 | OTHER | complex event                      |
| 5-182 | 5 | 73431175 | 73600499 | Misassembly | NONE | 73431175 | 73600499 | 0 | OTHER | complex event                      |
| 5-183 | 5 | 73717928 | 73770010 | Misassembly | NONE | 73717928 | 73770010 | 0 | OTHER | complex event                      |
| 5-184 | 5 | 73821045 | 73880610 | Misassembly | NONE | 73821045 | 73880610 | 0 | OTHER | complex event                      |
| 5-189 | 5 | 74574264 | 74659523 | Misassembly | NONE | 74574264 | 74659523 | 0 | OTHER | complex event                      |
| 5-190 | 5 | 74721646 | 74999133 | Misassembly | NONE | 74721646 | 74999133 | 0 | OTHER | complex event                      |
| 5-191 | 5 | 75120471 | 75171814 | Misassembly | NONE | 75120471 | 75171814 | 0 | OTHER | complex event                      |
| 5-192 | 5 | 75440379 | 75688825 | Misassembly | NONE | 75440379 | 75688825 | 0 | OTHER | complex event                      |
| 5-194 | 5 | 75854346 | 75942265 | Misassembly | NONE | 75854346 | 75942265 | 0 | OTHER | complex event                      |
| 5-196 | 5 | 76081333 | 76184747 | Misassembly | NONE | 76081333 | 76184747 | 0 | OTHER | complex event                      |
| 5-197 | 5 | 76287716 | 76384780 | Misassembly | NONE | 76287716 | 76384780 | 0 | OTHER | complex event                      |
| 5-198 | 5 | 76444966 | 76581654 | Misassembly | NONE | 76444966 | 76581654 | 0 | OTHER | complex event                      |
| 5-199 | 5 | 76742051 | 76826065 | Misassembly | NONE | 76742051 | 76826065 | 0 | OTHER | complex event                      |
| 5-200 | 5 | 76959629 | 77144333 | Misassembly | NONE | 76959629 | 77144333 | 0 | OTHER | complex event                      |
| 5-201 | 5 | 77348848 | 77688144 | Misassembly | NONE | 77348848 | 77688144 | 0 | OTHER | complex event                      |
| 5-203 | 5 | 78264708 | 78480448 | Misassembly | NONE | 78264708 | 78480448 | 0 | OTHER | complex event                      |
| 5-204 | 5 | 78643596 | 78707838 | Misassembly | NONE | 78643596 | 78707838 | 0 | OTHER | complex event                      |
| 5-205 | 5 | 78945354 | 79095498 | Misassembly | NONE | 78945354 | 79095498 | 0 | OTHER | complex event                      |
| 5-207 | 5 | 80645119 | 80799556 | Misassembly | NONE | 80645119 | 80799556 | 0 | OTHER | complex event                      |
| 5-208 | 5 | 80829870 | 80970664 | Misassembly | NONE | 80829870 | 80970664 | 0 | OTHER | complex event                      |
| 5-210 | 5 | 83546901 | 83770556 | Misassembly | NONE | 83546901 | 83770556 | 0 | OTHER | complex event                      |
| 5-211 | 5 | 83829407 | 83909554 | Misassembly | NONE | 83829407 | 83909554 | 0 | OTHER | complex event                      |
| 5-213 | 5 | 84255970 | 84432838 | Misassembly | NONE | 84255970 | 84432838 | 0 | OTHER | complex event                      |
| 5-214 | 5 | 84558824 | 84610781 | Misassembly | NONE | 84558824 | 84610781 | 0 | OTHER | complex event - possible inversion |
| 5-216 | 5 | 85214334 | 85537488 | Misassembly | NONE | 85214334 | 85537488 | 0 | OTHER | complex event                      |
| 5-217 | 5 | 85796523 | 85994271 | Misassembly | NONE | 85796523 | 85994271 | 0 | OTHER | complex event                      |
| 5-218 | 5 | 86158149 | 86199936 | Misassembly | NONE | 86158149 | 86199936 | 0 | OTHER | complex event                      |
| 5-219 | 5 | 86310757 | 86389903 | Misassembly | NONE | 86310757 | 86389903 | 0 | OTHER | complex event                      |
| 5-220 | 5 | 86560045 | 86619980 | Misassembly | NONE | 86560045 | 86619980 | 0 | OTHER | complex event                      |
| 5-221 | 5 | 86686634 | 86745082 | Misassembly | NONE | 86686634 | 86745082 | 0 | OTHER | complex event                      |
| 5-222 | 5 | 86892108 | 87025277 | Misassembly | NONE | 86892108 | 87025277 | 0 | OTHER | complex event                      |
| 5-223 | 5 | 87198450 | 87295798 | Misassembly | NONE | 87198450 | 87295798 | 0 | OTHER | complex event                      |
| 5-224 | 5 | 87385391 | 87631261 | Misassembly | NONE | 87385391 | 87631261 | 0 | OTHER | complex event                      |
| 5-225 | 5 | 87698174 | 87815470 | Misassembly | NONE | 87698174 | 87815470 | 0 | OTHER | complex event                      |
| 5-226 | 5 | 87864104 | 87926079 | Misassembly | NONE | 87864104 | 87926079 | 0 | OTHER | complex event - possible inversion |
| 5-227 | 5 | 88048144 | 88158351 | Misassembly | NONE | 88048144 | 88158351 | 0 | OTHER | complex event                      |
| 5-229 | 5 | 88552092 | 88753068 | Misassembly | NONE | 88552092 | 88753068 | 0 | OTHER | complex event                      |
| 5-231 | 5 | 89021027 | 89284128 | Misassembly | NONE | 89021027 | 89284128 | 0 | OTHER | complex event                      |
| 5-232 | 5 | 89473483 | 89523535 | Misassembly | NONE | 89473483 | 89523535 | 0 | OTHER | complex event                      |
| 5-233 | 5 | 89670736 | 89861586 | Misassembly | NONE | 89670736 | 89861586 | 0 | OTHER | complex event                      |
| 5-234 | 5 | 90308334 | 90411669 | Misassembly | NONE | 90308334 | 90411669 | 0 | OTHER | complex event                      |
| 5-235 | 5 | 90545396 | 90619224 | Misassembly | NONE | 90545396 | 90619224 | 0 | OTHER | complex event                      |
| 5-236 | 5 | 90663976 | 91056310 | Misassembly | NONE | 90663976 | 91056310 | 0 | OTHER | complex event                      |
| 5-242 | 5 | 92486493 | 92572731 | Misassembly | NONE | 92486493 | 92572731 | 0 | OTHER | complex event                      |
| 5-243 | 5 | 92791509 | 92845196 | Misassembly | NONE | 92791509 | 92845196 | 0 | OTHER | complex event                      |
| 5-245 | 5 | 94048789 | 94203788 | Misassembly | NONE | 94048789 | 94203788 | 0 | OTHER | complex event                      |
| 5-246 | 5 | 94453640 | 94638979 | Misassembly | NONE | 94453640 | 94638979 | 0 | OTHER | complex event                      |
| 5-248 | 5 | 95298389 | 95459927 | Misassembly | NONE | 95298389 | 95459927 | 0 | OTHER | complex event                      |
| 5-249 | 5 | 95592797 | 95843266 | Misassembly | NONE | 95592797 | 95843266 | 0 | OTHER | complex event                      |
| 5-250 | 5 | 96010746 | 96177376 | Misassembly | NONE | 96010746 | 96177376 | 0 | OTHER | complex event                      |
| 5-251 | 5 | 96319671 | 96563869 | Misassembly | NONE | 96319671 | 96563869 | 0 | OTHER | complex event                      |
| 5-252 | 5 | 96835463 | 96891661 | Misassembly | NONE | 96835463 | 96891661 | 0 | OTHER | complex event                      |
| 5-254 | 5 | 97113340 | 97386708 | Misassembly | NONE | 97113340 | 97386708 | 0 | OTHER | complex event                      |
| 5-255 | 5 | 97600227 | 97689392 | Misassembly | NONE | 97600227 | 97689392 | 0 | OTHER | complex event                      |

|       |   |           |           |             |      |           |           |   |       |                                        |
|-------|---|-----------|-----------|-------------|------|-----------|-----------|---|-------|----------------------------------------|
| 5-258 | 5 | 98033645  | 98092413  | Misassembly | NONE | 98033645  | 98092413  | 0 | OTHER | complex event                          |
| 5-259 | 5 | 98215471  | 98366038  | Misassembly | NONE | 98215471  | 98366038  | 0 | OTHER | complex event                          |
| 5-261 | 5 | 98668819  | 98791450  | Misassembly | NONE | 98668819  | 98791450  | 0 | OTHER | complex event                          |
| 5-262 | 5 | 99274136  | 99307968  | Misassembly | NONE | 99274136  | 99307968  | 0 | OTHER | complex event                          |
| 5-263 | 5 | 99384495  | 99625602  | Misassembly | NONE | 99384495  | 99625602  | 0 | OTHER | complex event                          |
| 5-264 | 5 | 99760886  | 99803447  | Misassembly | NONE | 99760886  | 99803447  | 0 | OTHER | complex event                          |
| 5-266 | 5 | 100310237 | 100394292 | Misassembly | NONE | 100310237 | 100394292 | 0 | OTHER | complex event                          |
| 5-267 | 5 | 100731461 | 100892472 | Misassembly | NONE | 100731461 | 100892472 | 0 | OTHER | complex event                          |
| 5-269 | 5 | 104173927 | 104255758 | Misassembly | NONE | 104173927 | 104255758 | 0 | OTHER | complex event                          |
| 5-273 | 5 | 106067593 | 106428958 | Misassembly | NONE | 106067593 | 106428958 | 0 | OTHER | complex event                          |
| 5-274 | 5 | 107173955 | 107294567 | Misassembly | NONE | 107173955 | 107294567 | 0 | OTHER | complex event                          |
| 5-275 | 5 | 107435703 | 107499362 | Misassembly | NONE | 107435703 | 107499362 | 0 | OTHER | complex event                          |
| 5-276 | 5 | 107550674 | 107632905 | Misassembly | NONE | 107550674 | 107632905 | 0 | OTHER | complex event                          |
| 5-277 | 5 | 107660708 | 107896844 | Misassembly | NONE | 107660708 | 107896844 | 0 | OTHER | complex event                          |
| 5-278 | 5 | 107941435 | 107990028 | Misassembly | NONE | 107941435 | 107990028 | 0 | OTHER | complex event                          |
| 5-279 | 5 | 108037014 | 108115660 | Misassembly | NONE | 108037014 | 108115660 | 0 | OTHER | complex event                          |
| 5-280 | 5 | 108263014 | 108492241 | Misassembly | NONE | 108263014 | 108492241 | 0 | OTHER | complex event                          |
| 5-281 | 5 | 108644661 | 108695385 | Misassembly | NONE | 108644661 | 108695385 | 0 | OTHER | complex event                          |
| 5-282 | 5 | 108753991 | 108825083 | Misassembly | NONE | 108753991 | 108825083 | 0 | OTHER | complex event                          |
| 5-284 | 5 | 108952143 | 109048723 | Misassembly | NONE | 108952143 | 109048723 | 0 | OTHER | complex event                          |
| 5-285 | 5 | 109272733 | 109401097 | Misassembly | NONE | 109272733 | 109401097 | 0 | OTHER | complex event                          |
| 5-286 | 5 | 109683530 | 109906411 | Misassembly | NONE | 109683530 | 109906411 | 0 | OTHER | complex event                          |
| 5-287 | 5 | 109971524 | 110062982 | Misassembly | NONE | 109971524 | 110062982 | 0 | OTHER | complex event - possible translocation |
| 5-291 | 5 | 110803796 | 111096635 | Misassembly | NONE | 110803796 | 111096635 | 0 | OTHER | complex event                          |
| 5-292 | 5 | 111365049 | 111853963 | Misassembly | NONE | 111365049 | 111853963 | 0 | OTHER | complex event                          |
| 5-293 | 5 | 111995220 | 112405114 | Misassembly | NONE | 111995220 | 112405114 | 0 | OTHER | complex event                          |
| 5-294 | 5 | 112443149 | 112532242 | Misassembly | NONE | 112443149 | 112532242 | 0 | OTHER | complex event                          |
| 5-297 | 5 | 114055842 | 114103321 | Misassembly | NONE | 114055842 | 114103321 | 0 | OTHER | complex event                          |
| 5-300 | 5 | 116441539 | 116632706 | Misassembly | NONE | 116441539 | 116632706 | 0 | OTHER | complex event                          |
| 5-301 | 5 | 116786137 | 116835280 | Misassembly | NONE | 116786137 | 116835280 | 0 | OTHER | complex event                          |
| 5-302 | 5 | 117136301 | 117326719 | Misassembly | NONE | 117136301 | 117326719 | 0 | OTHER | complex event                          |
| 5-304 | 5 | 118662410 | 118709520 | Misassembly | NONE | 118662410 | 118709520 | 0 | OTHER | complex event - possible inversion     |
| 5-306 | 5 | 119514297 | 119669369 | Misassembly | NONE | 119514297 | 119669369 | 0 | OTHER | complex event - possible inversion     |
| 5-307 | 5 | 120075904 | 120164004 | Misassembly | NONE | 120075904 | 120164004 | 0 | OTHER | complex event                          |
| 5-309 | 5 | 120381322 | 120475178 | Misassembly | NONE | 120381322 | 120475178 | 0 | OTHER | complex event                          |
| 5-310 | 5 | 120606824 | 120825849 | Misassembly | NONE | 120606824 | 120825849 | 0 | OTHER | complex event                          |
| 5-314 | 5 | 121572829 | 121666784 | Misassembly | NONE | 121572829 | 121666784 | 0 | OTHER | complex event                          |
| 5-317 | 5 | 122633060 | 122791947 | Misassembly | NONE | 122633060 | 122791947 | 0 | OTHER | complex event                          |
| 5-318 | 5 | 122933705 | 123161347 | Misassembly | NONE | 122933705 | 123161347 | 0 | OTHER | complex event                          |
| 5-319 | 5 | 123226407 | 123438093 | Misassembly | NONE | 123226407 | 123438093 | 0 | OTHER | complex event                          |
| 5-321 | 5 | 123664300 | 123803851 | Misassembly | NONE | 123664300 | 123803851 | 0 | OTHER | complex event                          |
| 5-322 | 5 | 123921630 | 123967469 | Misassembly | NONE | 123921630 | 123967469 | 0 | OTHER | complex event                          |
| 5-324 | 5 | 124216359 | 124296706 | Misassembly | NONE | 124216359 | 124296706 | 0 | OTHER | complex event                          |
| 5-326 | 5 | 124502148 | 124590547 | Misassembly | NONE | 124502148 | 124590547 | 0 | OTHER | complex event                          |
| 5-330 | 5 | 125341318 | 125403423 | Misassembly | NONE | 125341318 | 125403423 | 0 | OTHER | complex event                          |
| 5-331 | 5 | 125523210 | 125816524 | Misassembly | NONE | 125523210 | 125816524 | 0 | OTHER | complex event                          |
| 5-332 | 5 | 125843978 | 125975243 | Misassembly | NONE | 125843978 | 125975243 | 0 | OTHER | complex event                          |
| 5-333 | 5 | 126216668 | 126328392 | Misassembly | NONE | 126216668 | 126328392 | 0 | OTHER | complex event                          |
| 5-335 | 5 | 126562113 | 126724214 | Misassembly | NONE | 126562113 | 126724214 | 0 | OTHER | complex event                          |
| 5-336 | 5 | 127138703 | 127212486 | Misassembly | NONE | 127138703 | 127212486 | 0 | OTHER | complex event - possible inversion     |
| 5-337 | 5 | 127333251 | 127369951 | Misassembly | NONE | 127333251 | 127369951 | 0 | OTHER | complex event                          |
| 5-339 | 5 | 130367572 | 130722014 | Misassembly | NONE | 130367572 | 130722014 | 0 | OTHER | complex event                          |
| 5-341 | 5 | 131233836 | 131335050 | Misassembly | NONE | 131233836 | 131335050 | 0 | OTHER | complex event                          |
| 5-342 | 5 | 131495612 | 131743373 | Misassembly | NONE | 131495612 | 131743373 | 0 | OTHER | complex event                          |
| 5-343 | 5 | 131789638 | 131817354 | Misassembly | NONE | 131789638 | 131817354 | 0 | OTHER | complex event - possible inversion     |
| 5-344 | 5 | 131851428 | 131912659 | Misassembly | NONE | 131851428 | 131912659 | 0 | OTHER | complex event - possible inversion     |
| 5-345 | 5 | 131954585 | 131997331 | Misassembly | NONE | 131954585 | 131997331 | 0 | OTHER | complex event                          |
| 5-346 | 5 | 132102156 | 132422878 | Misassembly | NONE | 132102156 | 132422878 | 0 | OTHER | complex event                          |
| 5-349 | 5 | 132911431 | 132945248 | Misassembly | NONE | 132911431 | 132945248 | 0 | OTHER | complex event                          |
| 5-350 | 5 | 133177064 | 133276428 | Misassembly | NONE | 133177064 | 133276428 | 0 | OTHER | complex event                          |
| 5-351 | 5 | 133337323 | 133987315 | Misassembly | NONE | 133337323 | 133987315 | 0 | OTHER | complex event                          |
| 5-352 | 5 | 134133664 | 134276839 | Misassembly | NONE | 134133664 | 134276839 | 0 | OTHER | complex event                          |
| 5-355 | 5 | 134569027 | 134692689 | Misassembly | NONE | 134569027 | 134692689 | 0 | OTHER | complex event                          |
| 5-356 | 5 | 134859510 | 134936273 | Misassembly | NONE | 134859510 | 134936273 | 0 | OTHER | complex event                          |
| 5-358 | 5 | 135557036 | 135615588 | Misassembly | NONE | 135557036 | 135615588 | 0 | OTHER | complex event                          |
| 5-361 | 5 | 136071556 | 136103843 | Misassembly | NONE | 136071556 | 136103843 | 0 | OTHER | complex event                          |
| 5-364 | 5 | 136762257 | 136939357 | Misassembly | NONE | 136762257 | 136939357 | 0 | OTHER | complex event                          |
| 5-365 | 5 | 137123283 | 137233196 | Misassembly | NONE | 137123283 | 137233196 | 0 | OTHER | complex event                          |
| 5-368 | 5 | 137672053 | 137756245 | Misassembly | NONE | 137672053 | 137756245 | 0 | OTHER | complex event                          |
| 5-369 | 5 | 137895958 | 138013380 | Misassembly | NONE | 137895958 | 138013380 | 0 | OTHER | complex event                          |
| 5-372 | 5 | 138523837 | 138682031 | Misassembly | NONE | 138523837 | 138682031 | 0 | OTHER | complex event                          |
| 5-373 | 5 | 138798125 | 138831657 | Misassembly | NONE | 138798125 | 138831657 | 0 | OTHER | complex event                          |
| 5-374 | 5 | 138982732 | 139064767 | Misassembly | NONE | 138982732 | 139064767 | 0 | OTHER | complex event                          |
| 5-375 | 5 | 139440751 | 139533743 | Misassembly | NONE | 139440751 | 139533743 | 0 | OTHER | complex event                          |
| 5-380 | 5 | 140949612 | 141286449 | Misassembly | NONE | 140949612 | 141286449 | 0 | OTHER | complex event                          |
| 5-381 | 5 | 141465727 | 142008575 | Misassembly | NONE | 141465727 | 142008575 | 0 | OTHER | complex event                          |
| 5-382 | 5 | 142092908 | 142118332 | Misassembly | NONE | 142092908 | 142118332 | 0 | OTHER | complex event                          |
| 5-384 | 5 | 142866559 | 142980032 | Misassembly | NONE | 142866559 | 142980032 | 0 | OTHER | complex event                          |
| 5-385 | 5 | 143038648 | 143208156 | Misassembly | NONE | 143038648 | 143208156 | 0 | OTHER | complex event                          |



|       |   |            |           |             |      |            |           |   |       |                                    |
|-------|---|------------|-----------|-------------|------|------------|-----------|---|-------|------------------------------------|
| 5-386 | 5 | 143461197  | 143534685 | Misassembly | NONE | 143461197  | 143534685 | 0 | OTHER | complex event                      |
| 5-387 | 5 | 143585737  | 143685804 | Misassembly | NONE | 143585737  | 143685804 | 0 | OTHER | complex event                      |
| 5-388 | 5 | 144205694  | 144382931 | Misassembly | NONE | 144205694  | 144382931 | 0 | OTHER | complex event                      |
| 5-390 | 5 | 144547651  | 144740073 | Misassembly | NONE | 144547651  | 144740073 | 0 | OTHER | complex event                      |
| 5-392 | 5 | 145778086  | 145905415 | Misassembly | NONE | 145778086  | 145905415 | 0 | OTHER | complex event                      |
| 5-395 | 5 | 146166835  | 146227725 | Misassembly | NONE | 146166835  | 146227725 | 0 | OTHER | complex event                      |
| 5-396 | 5 | 146265281  | 146324094 | Misassembly | NONE | 146265281  | 146324094 | 0 | OTHER | complex event                      |
| 5-399 | 5 | 148903986  | 149021004 | Misassembly | NONE | 148903986  | 149021004 | 0 | OTHER | complex event                      |
| 5-400 | 5 | 149171576  | 149208200 | Misassembly | NONE | 149171576  | 149208200 | 0 | OTHER | complex event - possible insertion |
| 5-401 | 5 | 150984707  | 151161715 | Misassembly | NONE | 150984707  | 151161715 | 0 | OTHER | complex event                      |
| 5-402 | 5 | 153033572  | 153130799 | Misassembly | NONE | 153033572  | 153130799 | 0 | OTHER | complex event                      |
| 5-403 | 5 | 153179438  | 153277598 | Misassembly | NONE | 153179438  | 153277598 | 0 | OTHER | complex event                      |
| 5-404 | 5 | 153713732  | 153803621 | Misassembly | NONE | 153713732  | 153803621 | 0 | OTHER | complex event                      |
| 5-405 | 5 | 153887377  | 153991233 | Misassembly | NONE | 153887377  | 153991233 | 0 | OTHER | complex event                      |
| 5-406 | 5 | 154036802  | 154383838 | Misassembly | NONE | 154036802  | 154383838 | 0 | OTHER | complex event                      |
| 5-407 | 5 | 154621573  | 154714696 | Misassembly | NONE | 154621573  | 154714696 | 0 | OTHER | complex event                      |
| 5-408 | 5 | 154932503  | 155122418 | Misassembly | NONE | 154932503  | 155122418 | 0 | OTHER | complex event                      |
| 5-409 | 5 | 155278873  | 155351834 | Misassembly | NONE | 155278873  | 155351834 | 0 | OTHER | complex event                      |
| 5-410 | 5 | 155375787  | 155532050 | Misassembly | NONE | 155375787  | 155532050 | 0 | OTHER | complex event                      |
| 5-411 | 5 | 155765604  | 156030706 | Misassembly | NONE | 155765604  | 156030706 | 0 | OTHER | complex event                      |
| 5-412 | 5 | 156083509  | 156273986 | Misassembly | NONE | 156083509  | 156273986 | 0 | OTHER | complex event                      |
| 5-413 | 5 | 156392147  | 156600393 | Misassembly | NONE | 156392147  | 156600393 | 0 | OTHER | complex event                      |
| 5-414 | 5 | 156767592  | 156903044 | Misassembly | NONE | 156767592  | 156903044 | 0 | OTHER | complex event                      |
| 5-416 | 5 | 157229819  | 157467720 | Misassembly | NONE | 157229819  | 157467720 | 0 | OTHER | complex event                      |
| 5-418 | 5 | 158085264  | 158250331 | Misassembly | NONE | 158085264  | 158250331 | 0 | OTHER | complex event                      |
| 5-419 | 5 | 158589511  | 158683407 | Misassembly | NONE | 158589511  | 158683407 | 0 | OTHER | complex event                      |
| 5-420 | 5 | 159010878  | 159136761 | Misassembly | NONE | 159010878  | 159136761 | 0 | OTHER | complex event                      |
| 5-421 | 5 | 159329910  | 159662490 | Misassembly | NONE | 159329910  | 159662490 | 0 | OTHER | complex event                      |
| 5-424 | 5 | 159964777  | 160100512 | Misassembly | NONE | 159964777  | 160100512 | 0 | OTHER | complex event                      |
| 5-427 | 5 | 162466768  | 162571595 | Misassembly | NONE | 162466768  | 162571595 | 0 | OTHER | complex event                      |
| 5-429 | 5 | 162838177  | 163035850 | Misassembly | NONE | 162838177  | 163035850 | 0 | OTHER | complex event                      |
| 5-431 | 5 | 163591371  | 163649463 | Misassembly | NONE | 163591371  | 163649463 | 0 | OTHER | complex event - possible inversion |
| 5-432 | 5 | 163700866  | 163788294 | Misassembly | NONE | 163700866  | 163788294 | 0 | OTHER | complex event                      |
| 5-433 | 5 | 163853307  | 163912130 | Misassembly | NONE | 163853307  | 163912130 | 0 | OTHER | complex event                      |
| 5-436 | 5 | 168253755  | 168466159 | Misassembly | NONE | 168253755  | 168466159 | 0 | OTHER | complex event                      |
| 5-438 | 5 | 168907011  | 169229945 | Misassembly | NONE | 168907011  | 169229945 | 0 | OTHER | complex event                      |
| 5-439 | 5 | 1696500744 | 169625929 | Misassembly | NONE | 1696500744 | 169625929 | 0 | OTHER | complex event                      |
| 5-440 | 5 | 169724478  | 169943714 | Misassembly | NONE | 169724478  | 169943714 | 0 | OTHER | complex event                      |
| 5-441 | 5 | 170080864  | 170347044 | Misassembly | NONE | 170080864  | 170347044 | 0 | OTHER | complex event                      |
| 5-443 | 5 | 170657656  | 170901728 | Misassembly | NONE | 170657656  | 170901728 | 0 | OTHER | complex event                      |
| 5-445 | 5 | 171224650  | 171477030 | Misassembly | NONE | 171224650  | 171477030 | 0 | OTHER | complex event                      |
| 5-446 | 5 | 171858051  | 172065621 | Misassembly | NONE | 171858051  | 172065621 | 0 | OTHER | complex event                      |
| 5-447 | 5 | 174531198  | 174649389 | Misassembly | NONE | 174531198  | 174649389 | 0 | OTHER | complex event                      |
| 5-448 | 5 | 174735028  | 174815147 | Misassembly | NONE | 174735028  | 174815147 | 0 | OTHER | complex event                      |
| 5-451 | 5 | 180805179  | 181036791 | Misassembly | NONE | 180805179  | 181036791 | 0 | OTHER | complex event                      |
| 5-452 | 5 | 181076655  | 181153653 | Misassembly | NONE | 181076655  | 181153653 | 0 | OTHER | complex event                      |
| 5-453 | 5 | 181250661  | 181335110 | Misassembly | NONE | 181250661  | 181335110 | 0 | OTHER | complex event                      |
| 5-454 | 5 | 181389434  | 181402956 | Misassembly | NONE | 181389434  | 181402956 | 0 | OTHER | complex event - possible inversion |
| 5-457 | 5 | 184433692  | 184556448 | Misassembly | NONE | 184433692  | 184556448 | 0 | OTHER | complex event                      |
| 5-459 | 5 | 184752847  | 184774789 | Misassembly | NONE | 184752847  | 184774789 | 0 | OTHER | complex event                      |
| 5-462 | 5 | 185986602  | 186047454 | Misassembly | NONE | 185986602  | 186047454 | 0 | OTHER | complex event                      |
| 5-463 | 5 | 186166707  | 186262754 | Misassembly | NONE | 186166707  | 186262754 | 0 | OTHER | complex event                      |
| 5-464 | 5 | 186389416  | 186423785 | Misassembly | NONE | 186389416  | 186423785 | 0 | OTHER | complex event                      |
| 5-467 | 5 | 186668394  | 186866718 | Misassembly | NONE | 186668394  | 186866718 | 0 | OTHER | complex event                      |
| 5-469 | 5 | 187486239  | 187799683 | Misassembly | NONE | 187486239  | 187799683 | 0 | OTHER | complex event                      |
| 5-470 | 5 | 187838153  | 187869664 | Misassembly | NONE | 187838153  | 187869664 | 0 | OTHER | complex event                      |
| 5-471 | 5 | 187950813  | 188039245 | Misassembly | NONE | 187950813  | 188039245 | 0 | OTHER | complex event                      |
| 5-472 | 5 | 188369037  | 188601187 | Misassembly | NONE | 188369037  | 188601187 | 0 | OTHER | complex event                      |
| 5-473 | 5 | 190317012  | 190384545 | Misassembly | NONE | 190317012  | 190384545 | 0 | OTHER | complex event                      |
| 5-476 | 5 | 195207790  | 195308755 | Misassembly | NONE | 195207790  | 195308755 | 0 | OTHER | complex event                      |
| 5-478 | 5 | 195536954  | 195669905 | Misassembly | NONE | 195536954  | 195669905 | 0 | OTHER | complex event                      |
| 5-480 | 5 | 195986880  | 196454338 | Misassembly | NONE | 195986880  | 196454338 | 0 | OTHER | complex event                      |
| 5-481 | 5 | 197111615  | 197366278 | Misassembly | NONE | 197111615  | 197366278 | 0 | OTHER | complex event                      |
| 5-483 | 5 | 197760297  | 197808802 | Misassembly | NONE | 197760297  | 197808802 | 0 | OTHER | complex event                      |
| 5-484 | 5 | 197841204  | 197922562 | Misassembly | NONE | 197841204  | 197922562 | 0 | OTHER | complex event                      |
| 5-485 | 5 | 198091794  | 198219106 | Misassembly | NONE | 198091794  | 198219106 | 0 | OTHER | complex event                      |
| 5-486 | 5 | 198327239  | 198526701 | Misassembly | NONE | 198327239  | 198526701 | 0 | OTHER | complex event                      |
| 5-487 | 5 | 198570322  | 198671525 | Misassembly | NONE | 198570322  | 198671525 | 0 | OTHER | complex event                      |
| 5-489 | 5 | 198832310  | 198997728 | Misassembly | NONE | 198832310  | 198997728 | 0 | OTHER | complex event                      |
| 5-491 | 5 | 201979064  | 202053146 | Misassembly | NONE | 201979064  | 202053146 | 0 | OTHER | complex event                      |
| 5-492 | 5 | 202382565  | 202449662 | Misassembly | NONE | 202382565  | 202449662 | 0 | OTHER | complex event                      |
| 5-496 | 5 | 212353780  | 212432549 | Misassembly | NONE | 212353780  | 212432549 | 0 | OTHER | complex event                      |
| 5-497 | 5 | 212922401  | 213179148 | Misassembly | NONE | 212922401  | 213179148 | 0 | OTHER | complex event                      |
| 5-498 | 5 | 213346200  | 213432096 | Misassembly | NONE | 213346200  | 213432096 | 0 | OTHER | complex event                      |
| 5-499 | 5 | 213499415  | 213537654 | Misassembly | NONE | 213499415  | 213537654 | 0 | OTHER | complex event                      |
| 5-500 | 5 | 213762818  | 213880579 | Misassembly | NONE | 213762818  | 213880579 | 0 | OTHER | complex event                      |
| 5-502 | 5 | 214087669  | 214424033 | Misassembly | NONE | 214087669  | 214424033 | 0 | OTHER | complex event                      |
| 5-503 | 5 | 214699892  | 214812438 | Misassembly | NONE | 214699892  | 214812438 | 0 | OTHER | complex event                      |
| 5-504 | 5 | 214850565  | 215004884 | Misassembly | NONE | 214850565  | 215004884 | 0 | OTHER | complex event                      |
| 5-505 | 5 | 215259018  | 215437392 | Misassembly | NONE | 215259018  | 215437392 | 0 | OTHER | complex event                      |
| 5-507 | 5 | 215989570  | 216018414 | Misassembly | NONE | 215989570  | 216018414 | 0 | OTHER | complex event - possible inversion |
| 6-5   | 6 | 3387374    | 3493470   | Misassembly | NONE | 3387374    | 3493470   | 0 | OTHER | complex event                      |
| 6-6   | 6 | 5713204    | 5806392   | Misassembly | NONE | 5713204    | 5806392   | 0 | OTHER | complex event                      |

|       |   |          |          |             |      |          |          |   |       |                                           |
|-------|---|----------|----------|-------------|------|----------|----------|---|-------|-------------------------------------------|
| 6-8   | 6 | 9571703  | 9676613  | Misassembly | NONE | 9571703  | 9676613  | 0 | OTHER | complex event                             |
| 6-10  | 6 | 11930273 | 11958290 | Misassembly | NONE | 11930273 | 11958290 | 0 | OTHER | complex event                             |
| 6-12  | 6 | 12415833 | 12542339 | Misassembly | NONE | 12415833 | 12542339 | 0 | OTHER | complex event                             |
| 6-14  | 6 | 18915172 | 19029728 | Misassembly | NONE | 18915172 | 19029728 | 0 | OTHER | complex event                             |
| 6-15  | 6 | 19249093 | 19279997 | Misassembly | NONE | 19249093 | 19279997 | 0 | OTHER | complex event - possible inversion        |
| 6-18  | 6 | 19829880 | 19972380 | Misassembly | NONE | 19829880 | 19972380 | 0 | OTHER | complex event                             |
| 6-20  | 6 | 20401458 | 20479664 | Misassembly | NONE | 20401458 | 20479664 | 0 | OTHER | complex event                             |
| 6-21  | 6 | 20543396 | 20715621 | Misassembly | NONE | 20543396 | 20715621 | 0 | OTHER | complex event                             |
| 6-24  | 6 | 21985073 | 22120717 | Misassembly | NONE | 21985073 | 22120717 | 0 | OTHER | complex event                             |
| 6-26  | 6 | 29694726 | 29886792 | Misassembly | NONE | 29694726 | 29886792 | 0 | OTHER | complex event                             |
| 6-27  | 6 | 30872256 | 31224465 | Misassembly | NONE | 30872256 | 31224465 | 0 | OTHER | complex event                             |
| 6-28  | 6 | 31325148 | 31393267 | Misassembly | NONE | 31325148 | 31393267 | 0 | OTHER | complex event                             |
| 6-29  | 6 | 31692447 | 31761408 | Misassembly | NONE | 31692447 | 31761408 | 0 | OTHER | complex event                             |
| 6-30  | 6 | 32108697 | 32213817 | Misassembly | NONE | 32108697 | 32213817 | 0 | OTHER | complex event                             |
| 6-31  | 6 | 32252234 | 32295606 | Misassembly | NONE | 32252234 | 32295606 | 0 | OTHER | complex event                             |
| 6-32  | 6 | 32447571 | 32634975 | Misassembly | NONE | 32447571 | 32634975 | 0 | OTHER | complex event                             |
| 6-33  | 6 | 32906228 | 33007257 | Misassembly | NONE | 32906228 | 33007257 | 0 | OTHER | complex event                             |
| 6-35  | 6 | 33341332 | 33390155 | Misassembly | NONE | 33341332 | 33390155 | 0 | OTHER | complex event                             |
| 6-36  | 6 | 33524960 | 33644807 | Misassembly | NONE | 33524960 | 33644807 | 0 | OTHER | complex event                             |
| 6-38  | 6 | 33821931 | 33912466 | Misassembly | NONE | 33821931 | 33912466 | 0 | OTHER | complex event                             |
| 6-39  | 6 | 34040179 | 34129685 | Misassembly | NONE | 34040179 | 34129685 | 0 | OTHER | complex event                             |
| 6-40  | 6 | 34308671 | 34358904 | Misassembly | NONE | 34308671 | 34358904 | 0 | OTHER | complex event                             |
| 6-41  | 6 | 34431871 | 34543624 | Misassembly | NONE | 34431871 | 34543624 | 0 | OTHER | complex event                             |
| 6-43  | 6 | 34642065 | 34910716 | Misassembly | NONE | 34642065 | 34910716 | 0 | OTHER | complex event                             |
| 6-44  | 6 | 35395616 | 35531567 | Misassembly | NONE | 35395616 | 35531567 | 0 | OTHER | complex event                             |
| 6-45  | 6 | 35848754 | 36094308 | Misassembly | NONE | 35848754 | 36094308 | 0 | OTHER | complex event                             |
| 6-46  | 6 | 36256908 | 36359903 | Misassembly | NONE | 36256908 | 36359903 | 0 | OTHER | complex event                             |
| 6-49  | 6 | 37241635 | 37405690 | Misassembly | NONE | 37241635 | 37405690 | 0 | OTHER | complex event                             |
| 6-52  | 6 | 37754889 | 37890530 | Misassembly | NONE | 37754889 | 37890530 | 0 | OTHER | complex event                             |
| 6-53  | 6 | 38019373 | 38234043 | Misassembly | NONE | 38019373 | 38234043 | 0 | OTHER | complex event                             |
| 6-54  | 6 | 38507375 | 38573044 | Misassembly | NONE | 38507375 | 38573044 | 0 | OTHER | complex event                             |
| 6-55  | 6 | 38671118 | 38703851 | Misassembly | NONE | 38671118 | 38703851 | 0 | OTHER | complex event                             |
| 6-56  | 6 | 38834582 | 39055707 | Misassembly | NONE | 38834582 | 39055707 | 0 | OTHER | complex event                             |
| 6-57  | 6 | 39253926 | 39287851 | Misassembly | NONE | 39253926 | 39287851 | 0 | OTHER | complex event                             |
| 6-58  | 6 | 39623333 | 39692608 | Misassembly | NONE | 39623333 | 39692608 | 0 | OTHER | complex event                             |
| 6-59  | 6 | 39825367 | 39959278 | Misassembly | NONE | 39825367 | 39959278 | 0 | OTHER | complex event                             |
| 6-60  | 6 | 40111860 | 40145092 | Misassembly | NONE | 40111860 | 40145092 | 0 | OTHER | complex event                             |
| 6-63  | 6 | 40670938 | 40716868 | Misassembly | NONE | 40670938 | 40716868 | 0 | OTHER | complex event - possible inversion        |
| 6-65  | 6 | 41004939 | 41037575 | Misassembly | NONE | 41004939 | 41037575 | 0 | OTHER | complex event                             |
| 6-66  | 6 | 41267998 | 41389085 | Misassembly | NONE | 41267998 | 41389085 | 0 | OTHER | complex event                             |
| 6-67  | 6 | 41744651 | 41894744 | Misassembly | NONE | 41744651 | 41894744 | 0 | OTHER | complex event                             |
| 6-70  | 6 | 46717161 | 47143181 | Misassembly | NONE | 46717161 | 47143181 | 0 | OTHER | complex event                             |
| 6-71  | 6 | 47181882 | 47307557 | Misassembly | NONE | 47181882 | 47307557 | 0 | OTHER | complex event                             |
| 6-73  | 6 | 50575242 | 50602408 | Misassembly | NONE | 50575242 | 50602408 | 0 | OTHER | complex event                             |
| 6-74  | 6 | 50784897 | 50853464 | Misassembly | NONE | 50784897 | 50853464 | 0 | OTHER | complex event                             |
| 6-75  | 6 | 51210641 | 51283273 | Misassembly | NONE | 51210641 | 51283273 | 0 | OTHER | complex event                             |
| 6-77  | 6 | 51708681 | 51939301 | Misassembly | NONE | 51708681 | 51939301 | 0 | OTHER | complex event                             |
| 6-79  | 6 | 52341161 | 52544971 | Misassembly | NONE | 52341161 | 52544971 | 0 | OTHER | complex event                             |
| 6-81  | 6 | 52791831 | 52848605 | Misassembly | NONE | 52791831 | 52848605 | 0 | OTHER | complex event                             |
| 6-83  | 6 | 53074418 | 53233057 | Misassembly | NONE | 53074418 | 53233057 | 0 | OTHER | complex event                             |
| 6-85  | 6 | 53461217 | 53726734 | Misassembly | NONE | 53461217 | 53726734 | 0 | OTHER | complex event                             |
| 6-86  | 6 | 53893341 | 54114101 | Misassembly | NONE | 53893341 | 54114101 | 0 | OTHER | complex event                             |
| 6-87  | 6 | 54203941 | 54276029 | Misassembly | NONE | 54203941 | 54276029 | 0 | OTHER | complex event                             |
| 6-88  | 6 | 54406918 | 54622953 | Misassembly | NONE | 54406918 | 54622953 | 0 | OTHER | complex event                             |
| 6-89  | 6 | 54798793 | 54856141 | Misassembly | NONE | 54798793 | 54856141 | 0 | OTHER | complex event                             |
| 6-92  | 6 | 55225917 | 55401240 | Misassembly | NONE | 55225917 | 55401240 | 0 | OTHER | complex event                             |
| 6-93  | 6 | 55440596 | 55781577 | Misassembly | NONE | 55440596 | 55781577 | 0 | OTHER | complex event                             |
| 6-100 | 6 | 56950473 | 57025309 | Misassembly | NONE | 56950473 | 57025309 | 0 | OTHER | complex event                             |
| 6-101 | 6 | 57162151 | 57248916 | Misassembly | NONE | 57162151 | 57248916 | 0 | OTHER | complex event                             |
| 6-102 | 6 | 57581973 | 57825625 | Misassembly | NONE | 57581973 | 57825625 | 0 | OTHER | complex event                             |
| 6-104 | 6 | 60722895 | 60838678 | Misassembly | NONE | 60722895 | 60838678 | 0 | OTHER | complex event                             |
| 6-105 | 6 | 60921960 | 61059481 | Misassembly | NONE | 60921960 | 61059481 | 0 | OTHER | complex event                             |
| 6-107 | 6 | 61390413 | 61478137 | Misassembly | NONE | 61390413 | 61478137 | 0 | OTHER | complex event                             |
| 6-108 | 6 | 61527010 | 61619067 | Misassembly | NONE | 61527010 | 61619067 | 0 | OTHER | complex event                             |
| 6-110 | 6 | 61952283 | 62038510 | Misassembly | NONE | 61952283 | 62038510 | 0 | OTHER | complex event                             |
| 6-111 | 6 | 62354496 | 62438625 | Misassembly | NONE | 62354496 | 62438625 | 0 | OTHER | complex event                             |
| 6-113 | 6 | 62593368 | 62666740 | Misassembly | NONE | 62593368 | 62666740 | 0 | OTHER | complex event                             |
| 6-114 | 6 | 62951200 | 63124022 | Misassembly | NONE | 62951200 | 63124022 | 0 | OTHER | complex event                             |
| 6-115 | 6 | 64002884 | 64114660 | Misassembly | NONE | 64002884 | 64114660 | 0 | OTHER | complex event - possible inversion within |
| 6-116 | 6 | 64170084 | 64184217 | Misassembly | NONE | 64170084 | 64184217 | 0 | OTHER | complex event - possible inversion        |
| 6-117 | 6 | 64418762 | 64495550 | Misassembly | NONE | 64418762 | 64495550 | 0 | OTHER | complex event                             |
| 6-120 | 6 | 64934432 | 65157108 | Misassembly | NONE | 64934432 | 65157108 | 0 | OTHER | complex event                             |
| 6-121 | 6 | 65187074 | 65222437 | Misassembly | NONE | 65187074 | 65222437 | 0 | OTHER | complex event                             |
| 6-122 | 6 | 65333453 | 65346039 | Misassembly | NONE | 65333453 | 65346039 | 0 | OTHER | complex event                             |
| 6-124 | 6 | 65584303 | 65727395 | Misassembly | NONE | 65584303 | 65727395 | 0 | OTHER | complex event                             |
| 6-125 | 6 | 65911268 | 65947223 | Misassembly | NONE | 65911268 | 65947223 | 0 | OTHER | complex event                             |
| 6-126 | 6 | 66126755 | 66214859 | Misassembly | NONE | 66126755 | 66214859 | 0 | OTHER | complex event                             |
| 6-128 | 6 | 66445001 | 66668003 | Misassembly | NONE | 66445001 | 66668003 | 0 | OTHER | complex event                             |
| 6-129 | 6 | 66717889 | 66746258 | Misassembly | NONE | 66717889 | 66746258 | 0 | OTHER | complex event                             |
| 6-132 | 6 | 67551988 | 67638372 | Misassembly | NONE | 67551988 | 67638372 | 0 | OTHER | complex event                             |
| 6-139 | 6 | 70498872 | 70546320 | Misassembly | NONE | 70498872 | 70546320 | 0 | OTHER | complex event                             |

|       |   |           |           |              |      |           |           |   |       |                                    |
|-------|---|-----------|-----------|--------------|------|-----------|-----------|---|-------|------------------------------------|
| 6-143 | 6 | 74397839  | 74444318  | Misassembley | NONE | 74397839  | 74444318  | 0 | OTHER | complex event - possible inversion |
| 6-144 | 6 | 74477428  | 74612253  | Misassembley | NONE | 74477428  | 74612253  | 0 | OTHER | complex event                      |
| 6-145 | 6 | 74824837  | 75031884  | Misassembley | NONE | 74824837  | 75031884  | 0 | OTHER | complex event                      |
| 6-146 | 6 | 75061866  | 75509541  | Misassembley | NONE | 75061866  | 75509541  | 0 | OTHER | complex event                      |
| 6-147 | 6 | 75700006  | 75832402  | Misassembley | NONE | 75700006  | 75832402  | 0 | OTHER | complex event                      |
| 6-148 | 6 | 76017041  | 76125878  | Misassembley | NONE | 76017041  | 76125878  | 0 | OTHER | complex event                      |
| 6-149 | 6 | 76411944  | 76534813  | Misassembley | NONE | 76411944  | 76534813  | 0 | OTHER | complex event                      |
| 6-151 | 6 | 77342950  | 77515710  | Misassembley | NONE | 77342950  | 77515710  | 0 | OTHER | complex event                      |
| 6-152 | 6 | 77893309  | 77994640  | Misassembley | NONE | 77893309  | 77994640  | 0 | OTHER | complex event                      |
| 6-153 | 6 | 78022895  | 78201066  | Misassembley | NONE | 78022895  | 78201066  | 0 | OTHER | complex event                      |
| 6-155 | 6 | 78402800  | 78549950  | Misassembley | NONE | 78402800  | 78549950  | 0 | OTHER | complex event                      |
| 6-156 | 6 | 78682405  | 78803707  | Misassembley | NONE | 78682405  | 78803707  | 0 | OTHER | complex event                      |
| 6-158 | 6 | 79060829  | 79193000  | Misassembley | NONE | 79060829  | 79193000  | 0 | OTHER | complex event                      |
| 6-161 | 6 | 79965960  | 80057658  | Misassembley | NONE | 79965960  | 80057658  | 0 | OTHER | complex event                      |
| 6-162 | 6 | 80295734  | 80373055  | Misassembley | NONE | 80295734  | 80373055  | 0 | OTHER | complex event                      |
| 6-163 | 6 | 80763939  | 80966632  | Misassembley | NONE | 80763939  | 80966632  | 0 | OTHER | complex event                      |
| 6-164 | 6 | 81292871  | 81608042  | Misassembley | NONE | 81292871  | 81608042  | 0 | OTHER | complex event                      |
| 6-165 | 6 | 83322451  | 83381448  | Misassembley | NONE | 83322451  | 83381448  | 0 | OTHER | complex event                      |
| 6-167 | 6 | 88617285  | 88715573  | Misassembley | NONE | 88617285  | 88715573  | 0 | OTHER | complex event                      |
| 6-171 | 6 | 92751976  | 92793000  | Misassembley | NONE | 92751976  | 92793000  | 0 | OTHER | complex event                      |
| 6-172 | 6 | 97389201  | 97674995  | Misassembley | NONE | 97389201  | 97674995  | 0 | OTHER | complex event                      |
| 6-174 | 6 | 138527094 | 138598576 | Misassembley | NONE | 138527094 | 138598576 | 0 | OTHER | complex event                      |
| 7-1   | 7 | 1411593   | 1514361   | Misassembley | NONE | 1411593   | 1514361   | 0 | OTHER | complex event                      |
| 7-5   | 7 | 6341973   | 6444024   | Misassembley | NONE | 6341973   | 6444024   | 0 | OTHER | complex event                      |
| 7-8   | 7 | 6870804   | 6929713   | Misassembley | NONE | 6870804   | 6929713   | 0 | OTHER | complex event - possible inversion |
| 7-9   | 7 | 7104285   | 7153350   | Misassembley | NONE | 7104285   | 7153350   | 0 | OTHER | complex event                      |
| 7-11  | 7 | 7267662   | 7342490   | Misassembley | NONE | 7267662   | 7342490   | 0 | OTHER | complex event                      |
| 7-12  | 7 | 7407470   | 7557689   | Misassembley | NONE | 7407470   | 7557689   | 0 | OTHER | complex event                      |
| 7-13  | 7 | 7621466   | 7796058   | Misassembley | NONE | 7621466   | 7796058   | 0 | OTHER | complex event                      |
| 7-15  | 7 | 7880710   | 7992690   | Misassembley | NONE | 7880710   | 7992690   | 0 | OTHER | complex event                      |
| 7-16  | 7 | 8199108   | 8540794   | Misassembley | NONE | 8199108   | 8540794   | 0 | OTHER | complex event                      |
| 7-19  | 7 | 8890849   | 9060553   | Misassembley | NONE | 8890849   | 9060553   | 0 | OTHER | complex event                      |
| 7-21  | 7 | 9692677   | 9789579   | Misassembley | NONE | 9692677   | 9789579   | 0 | OTHER | complex event - possible inversion |
| 7-23  | 7 | 10078708  | 10282718  | Misassembley | NONE | 10078708  | 10282718  | 0 | OTHER | complex event                      |
| 7-29  | 7 | 15431515  | 15697592  | Misassembley | NONE | 15431515  | 15697592  | 0 | OTHER | complex event                      |
| 7-31  | 7 | 16119669  | 16220901  | Misassembley | NONE | 16119669  | 16220901  | 0 | OTHER | complex event                      |
| 7-32  | 7 | 16817452  | 17019045  | Misassembley | NONE | 16817452  | 17019045  | 0 | OTHER | complex event                      |
| 7-33  | 7 | 17117454  | 17437884  | Misassembley | NONE | 17117454  | 17437884  | 0 | OTHER | complex event                      |
| 7-34  | 7 | 17633132  | 17910998  | Misassembley | NONE | 17633132  | 17910998  | 0 | OTHER | complex event                      |
| 7-35  | 7 | 18098736  | 18475240  | Misassembley | NONE | 18098736  | 18475240  | 0 | OTHER | complex event                      |
| 7-40  | 7 | 23216189  | 23287500  | Misassembley | NONE | 23216189  | 23287500  | 0 | OTHER | complex event                      |
| 7-42  | 7 | 24613296  | 24675554  | Misassembley | NONE | 24613296  | 24675554  | 0 | OTHER | complex event                      |
| 7-43  | 7 | 25930185  | 26130874  | Misassembley | NONE | 25930185  | 26130874  | 0 | OTHER | complex event                      |
| 7-46  | 7 | 28271624  | 28397718  | Misassembley | NONE | 28271624  | 28397718  | 0 | OTHER | complex event                      |
| 7-50  | 7 | 32327012  | 32434358  | Misassembley | NONE | 32327012  | 32434358  | 0 | OTHER | complex event                      |
| 7-52  | 7 | 34525179  | 34693031  | Misassembley | NONE | 34525179  | 34693031  | 0 | OTHER | complex event                      |
| 7-56  | 7 | 36030879  | 36089748  | Misassembley | NONE | 36030879  | 36089748  | 0 | OTHER | complex event - possible inversion |
| 7-57  | 7 | 36293140  | 36478317  | Misassembley | NONE | 36293140  | 36478317  | 0 | OTHER | complex event                      |
| 7-58  | 7 | 36646570  | 36740106  | Misassembley | NONE | 36646570  | 36740106  | 0 | OTHER | complex event                      |
| 7-59  | 7 | 37362009  | 37464118  | Misassembley | NONE | 37362009  | 37464118  | 0 | OTHER | complex event - possible inversion |
| 7-60  | 7 | 37753664  | 37960516  | Misassembley | NONE | 37753664  | 37960516  | 0 | OTHER | complex event                      |
| 7-63  | 7 | 38521452  | 38601005  | Misassembley | NONE | 38521452  | 38601005  | 0 | OTHER | complex event                      |
| 7-65  | 7 | 38878383  | 39013828  | Misassembley | NONE | 38878383  | 39013828  | 0 | OTHER | complex event                      |
| 7-66  | 7 | 39061059  | 39159895  | Misassembley | NONE | 39061059  | 39159895  | 0 | OTHER | complex event                      |
| 7-67  | 7 | 39212817  | 39577856  | Misassembley | NONE | 39212817  | 39577856  | 0 | OTHER | complex event                      |
| 7-68  | 7 | 39877230  | 39942693  | Misassembley | NONE | 39877230  | 39942693  | 0 | OTHER | complex event                      |
| 7-72  | 7 | 40680207  | 40748248  | Misassembley | NONE | 40680207  | 40748248  | 0 | OTHER | complex event                      |
| 7-73  | 7 | 40869248  | 40970312  | Misassembley | NONE | 40869248  | 40970312  | 0 | OTHER | complex event                      |
| 7-74  | 7 | 41113896  | 41350012  | Misassembley | NONE | 41113896  | 41350012  | 0 | OTHER | complex event                      |
| 7-76  | 7 | 42129627  | 42198612  | Misassembley | NONE | 42129627  | 42198612  | 0 | OTHER | complex event                      |
| 7-77  | 7 | 42394619  | 42535561  | Misassembley | NONE | 42394619  | 42535561  | 0 | OTHER | complex event                      |
| 7-78  | 7 | 44464871  | 44533406  | Misassembley | NONE | 44464871  | 44533406  | 0 | OTHER | complex event                      |
| 7-83  | 7 | 45075959  | 45256468  | Misassembley | NONE | 45075959  | 45256468  | 0 | OTHER | complex event                      |
| 7-84  | 7 | 45312447  | 45387592  | Misassembley | NONE | 45312447  | 45387592  | 0 | OTHER | complex event                      |
| 7-85  | 7 | 45677984  | 46060428  | Misassembley | NONE | 45677984  | 46060428  | 0 | OTHER | complex event                      |
| 7-86  | 7 | 46383946  | 46422143  | Misassembley | NONE | 46383946  | 46422143  | 0 | OTHER | complex event                      |
| 7-87  | 7 | 47028885  | 47145236  | Misassembley | NONE | 47028885  | 47145236  | 0 | OTHER | complex event                      |
| 7-88  | 7 | 47189605  | 47425255  | Misassembley | NONE | 47189605  | 47425255  | 0 | OTHER | complex event                      |
| 7-89  | 7 | 47652538  | 47692042  | Misassembley | NONE | 47652538  | 47692042  | 0 | OTHER | complex event                      |
| 7-91  | 7 | 47878866  | 47946946  | Misassembley | NONE | 47878866  | 47946946  | 0 | OTHER | complex event                      |
| 7-93  | 7 | 48158196  | 48187789  | Misassembley | NONE | 48158196  | 48187789  | 0 | OTHER | complex event                      |
| 7-95  | 7 | 48295883  | 48520640  | Misassembley | NONE | 48295883  | 48520640  | 0 | OTHER | complex event                      |
| 7-98  | 7 | 48858876  | 48887773  | Misassembley | NONE | 48858876  | 48887773  | 0 | OTHER | complex event                      |
| 7-100 | 7 | 49675116  | 49774335  | Misassembley | NONE | 49675116  | 49774335  | 0 | OTHER | complex event                      |
| 7-101 | 7 | 49843127  | 50091914  | Misassembley | NONE | 49843127  | 50091914  | 0 | OTHER | complex event                      |
| 7-103 | 7 | 50249976  | 50553867  | Misassembley | NONE | 50249976  | 50553867  | 0 | OTHER | complex event                      |
| 7-105 | 7 | 51074697  | 51244293  | Misassembley | NONE | 51074697  | 51244293  | 0 | OTHER | complex event                      |
| 7-107 | 7 | 54101531  | 54162035  | Misassembley | NONE | 54101531  | 54162035  | 0 | OTHER | complex event                      |
| 7-108 | 7 | 54325225  | 54451306  | Misassembley | NONE | 54325225  | 54451306  | 0 | OTHER | complex event                      |
| 7-109 | 7 | 54797098  | 55053087  | Misassembley | NONE | 54797098  | 55053087  | 0 | OTHER | complex event                      |
| 7-117 | 7 | 59691766  | 59762948  | Misassembley | NONE | 59691766  | 59762948  | 0 | OTHER | complex event                      |

|       |   |           |           |              |      |           |           |   |       |                                    |
|-------|---|-----------|-----------|--------------|------|-----------|-----------|---|-------|------------------------------------|
| 7-120 | 7 | 60316911  | 60442049  | Misassembley | NONE | 60316911  | 60442049  | 0 | OTHER | complex event                      |
| 7-121 | 7 | 60594259  | 60682552  | Misassembley | NONE | 60594259  | 60682552  | 0 | OTHER | complex event                      |
| 7-122 | 7 | 61025830  | 61103924  | Misassembley | NONE | 61025830  | 61103924  | 0 | OTHER | complex event                      |
| 7-123 | 7 | 61377464  | 61699254  | Misassembley | NONE | 61377464  | 61699254  | 0 | OTHER | complex event                      |
| 7-127 | 7 | 62568383  | 62604383  | Misassembley | NONE | 62568383  | 62604383  | 0 | OTHER | complex event                      |
| 7-128 | 7 | 62891750  | 63063372  | Misassembley | NONE | 62891750  | 63063372  | 0 | OTHER | complex event                      |
| 7-130 | 7 | 63312723  | 63396933  | Misassembley | NONE | 63312723  | 63396933  | 0 | OTHER | complex event                      |
| 7-131 | 7 | 63951913  | 63979529  | Misassembley | NONE | 63951913  | 63979529  | 0 | OTHER | complex event                      |
| 7-132 | 7 | 64069081  | 64148354  | Misassembley | NONE | 64069081  | 64148354  | 0 | OTHER | complex event                      |
| 7-134 | 7 | 64268107  | 64382821  | Misassembley | NONE | 64268107  | 64382821  | 0 | OTHER | complex event                      |
| 7-135 | 7 | 64474532  | 64639669  | Misassembley | NONE | 64474532  | 64639669  | 0 | OTHER | complex event                      |
| 7-136 | 7 | 64841533  | 64972315  | Misassembley | NONE | 64841533  | 64972315  | 0 | OTHER | complex event                      |
| 7-137 | 7 | 65529461  | 65587101  | Misassembley | NONE | 65529461  | 65587101  | 0 | OTHER | complex event                      |
| 7-138 | 7 | 65822613  | 66021564  | Misassembley | NONE | 65822613  | 66021564  | 0 | OTHER | complex event                      |
| 7-142 | 7 | 66751831  | 66938587  | Misassembley | NONE | 66751831  | 66938587  | 0 | OTHER | complex event                      |
| 7-143 | 7 | 67601472  | 67631075  | Misassembley | NONE | 67601472  | 67631075  | 0 | OTHER | complex event                      |
| 7-144 | 7 | 67899483  | 67950876  | Misassembley | NONE | 67899483  | 67950876  | 0 | OTHER | complex event                      |
| 7-145 | 7 | 68030614  | 68099421  | Misassembley | NONE | 68030614  | 68099421  | 0 | OTHER | complex event                      |
| 7-148 | 7 | 69427818  | 69670170  | Misassembley | NONE | 69427818  | 69670170  | 0 | OTHER | complex event                      |
| 7-149 | 7 | 70229123  | 70287966  | Misassembley | NONE | 70229123  | 70287966  | 0 | OTHER | complex event - possible inversion |
| 7-150 | 7 | 70449322  | 70730456  | Misassembley | NONE | 70449322  | 70730456  | 0 | OTHER | complex event                      |
| 7-151 | 7 | 70810275  | 71025630  | Misassembley | NONE | 70810275  | 71025630  | 0 | OTHER | complex event                      |
| 7-152 | 7 | 71056306  | 71291964  | Misassembley | NONE | 71056306  | 71291964  | 0 | OTHER | complex event                      |
| 7-153 | 7 | 71368077  | 71656743  | Misassembley | NONE | 71368077  | 71656743  | 0 | OTHER | complex event                      |
| 7-155 | 7 | 71840295  | 72050760  | Misassembley | NONE | 71840295  | 72050760  | 0 | OTHER | complex event                      |
| 7-157 | 7 | 72375722  | 72507809  | Misassembley | NONE | 72375722  | 72507809  | 0 | OTHER | complex event                      |
| 7-158 | 7 | 72792769  | 72932723  | Misassembley | NONE | 72792769  | 72932723  | 0 | OTHER | complex event                      |
| 7-159 | 7 | 73471967  | 73518010  | Misassembley | NONE | 73471967  | 73518010  | 0 | OTHER | complex event                      |
| 7-160 | 7 | 73622492  | 73795869  | Misassembley | NONE | 73622492  | 73795869  | 0 | OTHER | complex event                      |
| 7-161 | 7 | 74011616  | 74072050  | Misassembley | NONE | 74011616  | 74072050  | 0 | OTHER | complex event                      |
| 7-162 | 7 | 74217723  | 74592159  | Misassembley | NONE | 74217723  | 74592159  | 0 | OTHER | complex event                      |
| 7-163 | 7 | 74832840  | 75012450  | Misassembley | NONE | 74832840  | 75012450  | 0 | OTHER | complex event                      |
| 7-164 | 7 | 75317036  | 75351858  | Misassembley | NONE | 75317036  | 75351858  | 0 | OTHER | complex event                      |
| 7-165 | 7 | 75549107  | 75636028  | Misassembley | NONE | 75549107  | 75636028  | 0 | OTHER | complex event                      |
| 7-166 | 7 | 75661314  | 75863891  | Misassembley | NONE | 75661314  | 75863891  | 0 | OTHER | complex event                      |
| 7-167 | 7 | 76194092  | 76472268  | Misassembley | NONE | 76194092  | 76472268  | 0 | OTHER | complex event                      |
| 7-169 | 7 | 76867729  | 76982233  | Misassembley | NONE | 76867729  | 76982233  | 0 | OTHER | complex event - possible inversion |
| 7-171 | 7 | 77340490  | 77458796  | Misassembley | NONE | 77340490  | 77458796  | 0 | OTHER | complex event                      |
| 7-172 | 7 | 77864854  | 77959552  | Misassembley | NONE | 77864854  | 77959552  | 0 | OTHER | complex event                      |
| 7-173 | 7 | 77991492  | 78128768  | Misassembley | NONE | 77991492  | 78128768  | 0 | OTHER | complex event                      |
| 7-175 | 7 | 78396656  | 78528717  | Misassembley | NONE | 78396656  | 78528717  | 0 | OTHER | complex event                      |
| 7-176 | 7 | 78752664  | 78819772  | Misassembley | NONE | 78752664  | 78819772  | 0 | OTHER | complex event - possible inversion |
| 7-178 | 7 | 79738751  | 79810110  | Misassembley | NONE | 79738751  | 79810110  | 0 | OTHER | complex event                      |
| 7-180 | 7 | 80268880  | 80500696  | Misassembley | NONE | 80268880  | 80500696  | 0 | OTHER | complex event                      |
| 7-181 | 7 | 80608202  | 80802543  | Misassembley | NONE | 80608202  | 80802543  | 0 | OTHER | complex event                      |
| 7-183 | 7 | 83350363  | 83456964  | Misassembley | NONE | 83350363  | 83456964  | 0 | OTHER | complex event                      |
| 7-186 | 7 | 84890783  | 85054670  | Misassembley | NONE | 84890783  | 85054670  | 0 | OTHER | complex event                      |
| 7-187 | 7 | 85343982  | 85432474  | Misassembley | NONE | 85343982  | 85432474  | 0 | OTHER | complex event                      |
| 7-188 | 7 | 85616709  | 85738391  | Misassembley | NONE | 85616709  | 85738391  | 0 | OTHER | complex event                      |
| 7-189 | 7 | 85771977  | 85859852  | Misassembley | NONE | 85771977  | 85859852  | 0 | OTHER | complex event                      |
| 7-192 | 7 | 89409328  | 89498040  | Misassembley | NONE | 89409328  | 89498040  | 0 | OTHER | complex event                      |
| 7-193 | 7 | 89544607  | 89603187  | Misassembley | NONE | 89544607  | 89603187  | 0 | OTHER | complex event                      |
| 7-194 | 7 | 89640264  | 89729115  | Misassembley | NONE | 89640264  | 89729115  | 0 | OTHER | complex event                      |
| 7-195 | 7 | 89894376  | 90028953  | Misassembley | NONE | 89894376  | 90028953  | 0 | OTHER | complex event                      |
| 7-197 | 7 | 90315442  | 90408953  | Misassembley | NONE | 90315442  | 90408953  | 0 | OTHER | complex event                      |
| 7-199 | 7 | 90652475  | 90669639  | Misassembley | NONE | 90652475  | 90669639  | 0 | OTHER | complex event                      |
| 7-200 | 7 | 90807915  | 91014670  | Misassembley | NONE | 90807915  | 91014670  | 0 | OTHER | complex event                      |
| 7-201 | 7 | 91209093  | 91531240  | Misassembley | NONE | 91209093  | 91531240  | 0 | OTHER | complex event                      |
| 7-202 | 7 | 91660513  | 91939580  | Misassembley | NONE | 91660513  | 91939580  | 0 | OTHER | complex event                      |
| 7-203 | 7 | 91985397  | 92058492  | Misassembley | NONE | 91985397  | 92058492  | 0 | OTHER | complex event - possible inversion |
| 7-204 | 7 | 92372914  | 92688325  | Misassembley | NONE | 92372914  | 92688325  | 0 | OTHER | complex event                      |
| 7-206 | 7 | 93707294  | 93835917  | Misassembley | NONE | 93707294  | 93835917  | 0 | OTHER | complex event                      |
| 7-209 | 7 | 94223564  | 94352987  | Misassembley | NONE | 94223564  | 94352987  | 0 | OTHER | complex event                      |
| 7-211 | 7 | 94691710  | 94834784  | Misassembley | NONE | 94691710  | 94834784  | 0 | OTHER | complex event                      |
| 7-212 | 7 | 94895891  | 94966746  | Misassembley | NONE | 94895891  | 94966746  | 0 | OTHER | complex event                      |
| 7-216 | 7 | 98138167  | 98187078  | Misassembley | NONE | 98138167  | 98187078  | 0 | OTHER | complex event                      |
| 7-218 | 7 | 98593925  | 98846258  | Misassembley | NONE | 98593925  | 98846258  | 0 | OTHER | complex event                      |
| 7-219 | 7 | 98957308  | 99011113  | Misassembley | NONE | 98957308  | 99011113  | 0 | OTHER | complex event                      |
| 7-222 | 7 | 99376746  | 99460185  | Misassembley | NONE | 99376746  | 99460185  | 0 | OTHER | complex event                      |
| 7-223 | 7 | 99668482  | 99822603  | Misassembley | NONE | 99668482  | 99822603  | 0 | OTHER | complex event                      |
| 7-224 | 7 | 99960154  | 100055911 | Misassembley | NONE | 99960154  | 100055911 | 0 | OTHER | complex event                      |
| 7-225 | 7 | 100350017 | 100489235 | Misassembley | NONE | 100350017 | 100489235 | 0 | OTHER | complex event                      |
| 7-226 | 7 | 100541550 | 100683543 | Misassembley | NONE | 100541550 | 100683543 | 0 | OTHER | complex event                      |
| 7-227 | 7 | 100772800 | 100844357 | Misassembley | NONE | 100772800 | 100844357 | 0 | OTHER | complex event                      |
| 7-229 | 7 | 101410755 | 101579553 | Misassembley | NONE | 101410755 | 101579553 | 0 | OTHER | complex event                      |
| 7-231 | 7 | 101843846 | 101882409 | Misassembley | NONE | 101843846 | 101882409 | 0 | OTHER | complex event                      |
| 7-232 | 7 | 105935666 | 106190394 | Misassembley | NONE | 105935666 | 106190394 | 0 | OTHER | complex event                      |
| 7-234 | 7 | 106615501 | 106725810 | Misassembley | NONE | 106615501 | 106725810 | 0 | OTHER | complex event                      |
| 7-235 | 7 | 106817515 | 106845516 | Misassembley | NONE | 106817515 | 106845516 | 0 | OTHER | complex event - possible inversion |
| 7-236 | 7 | 106891693 | 107014786 | Misassembley | NONE | 106891693 | 107014786 | 0 | OTHER | complex event                      |
| 7-237 | 7 | 107072687 | 107154663 | Misassembley | NONE | 107072687 | 107154663 | 0 | OTHER | complex event                      |

|       |   |           |           |             |      |           |           |   |       |                                    |
|-------|---|-----------|-----------|-------------|------|-----------|-----------|---|-------|------------------------------------|
| 7-240 | 7 | 108432672 | 108540688 | Misassembly | NONE | 108432672 | 108540688 | 0 | OTHER | complex event                      |
| 7-242 | 7 | 110364834 | 110463861 | Misassembly | NONE | 110364834 | 110463861 | 0 | OTHER | complex event                      |
| 7-244 | 7 | 113211376 | 113264599 | Misassembly | NONE | 113211376 | 113264599 | 0 | OTHER | complex event                      |
| 7-248 | 7 | 113810436 | 113957512 | Misassembly | NONE | 113810436 | 113957512 | 0 | OTHER | complex event                      |
| 7-249 | 7 | 114101706 | 114332695 | Misassembly | NONE | 114101706 | 114332695 | 0 | OTHER | complex event                      |
| 7-250 | 7 | 114548145 | 114660281 | Misassembly | NONE | 114548145 | 114660281 | 0 | OTHER | complex event                      |
| 7-251 | 7 | 114808667 | 114850499 | Misassembly | NONE | 114808667 | 114850499 | 0 | OTHER | complex event                      |
| 7-252 | 7 | 114996493 | 115048615 | Misassembly | NONE | 114996493 | 115048615 | 0 | OTHER | complex event                      |
| 7-254 | 7 | 115290391 | 115364619 | Misassembly | NONE | 115290391 | 115364619 | 0 | OTHER | complex event                      |
| 7-256 | 7 | 117388650 | 117502701 | Misassembly | NONE | 117388650 | 117502701 | 0 | OTHER | complex event                      |
| 7-257 | 7 | 117562338 | 117680317 | Misassembly | NONE | 117562338 | 117680317 | 0 | OTHER | complex event                      |
| 7-262 | 7 | 120453446 | 120545406 | Misassembly | NONE | 120453446 | 120545406 | 0 | OTHER | complex event                      |
| 7-263 | 7 | 120721097 | 120810151 | Misassembly | NONE | 120721097 | 120810151 | 0 | OTHER | complex event                      |
| 7-266 | 7 | 127077514 | 127258626 | Misassembly | NONE | 127077514 | 127258626 | 0 | OTHER | complex event                      |
| 7-267 | 7 | 127289941 | 127369157 | Misassembly | NONE | 127289941 | 127369157 | 0 | OTHER | complex event                      |
| 7-268 | 7 | 131802388 | 131867281 | Misassembly | NONE | 131802388 | 131867281 | 0 | OTHER | complex event                      |
| 7-269 | 7 | 131911107 | 132087951 | Misassembly | NONE | 131911107 | 132087951 | 0 | OTHER | complex event                      |
| 7-270 | 7 | 133250150 | 133325359 | Misassembly | NONE | 133250150 | 133325359 | 0 | OTHER | complex event                      |
| 7-271 | 7 | 133416821 | 133507764 | Misassembly | NONE | 133416821 | 133507764 | 0 | OTHER | complex event - possible inversion |
| 7-273 | 7 | 135320870 | 135580962 | Misassembly | NONE | 135320870 | 135580962 | 0 | OTHER | complex event                      |
| 7-274 | 7 | 135645104 | 135846744 | Misassembly | NONE | 135645104 | 135846744 | 0 | OTHER | complex event                      |
| 7-275 | 7 | 135943606 | 136210736 | Misassembly | NONE | 135943606 | 136210736 | 0 | OTHER | complex event                      |
| 7-276 | 7 | 136416544 | 136755647 | Misassembly | NONE | 136416544 | 136755647 | 0 | OTHER | complex event                      |
| 7-277 | 7 | 136962526 | 137212336 | Misassembly | NONE | 136962526 | 137212336 | 0 | OTHER | complex event                      |
| 7-278 | 7 | 137568386 | 137651894 | Misassembly | NONE | 137568386 | 137651894 | 0 | OTHER | complex event                      |
| 7-279 | 7 | 137692441 | 137760985 | Misassembly | NONE | 137692441 | 137760985 | 0 | OTHER | complex event                      |
| 7-280 | 7 | 137866217 | 137914699 | Misassembly | NONE | 137866217 | 137914699 | 0 | OTHER | complex event                      |
| 7-281 | 7 | 137964908 | 137995183 | Misassembly | NONE | 137964908 | 137995183 | 0 | OTHER | complex event                      |
| 7-282 | 7 | 138105567 | 138212999 | Misassembly | NONE | 138105567 | 138212999 | 0 | OTHER | complex event                      |
| 7-284 | 7 | 138407599 | 138476173 | Misassembly | NONE | 138407599 | 138476173 | 0 | OTHER | complex event - possible inversion |
| 7-286 | 7 | 139094846 | 139214552 | Misassembly | NONE | 139094846 | 139214552 | 0 | OTHER | complex event                      |
| 7-287 | 7 | 139470764 | 139516930 | Misassembly | NONE | 139470764 | 139516930 | 0 | OTHER | complex event                      |
| 7-289 | 7 | 139795174 | 139841216 | Misassembly | NONE | 139795174 | 139841216 | 0 | OTHER | complex event                      |
| 7-290 | 7 | 139895818 | 140175349 | Misassembly | NONE | 139895818 | 140175349 | 0 | OTHER | complex event                      |
| 7-294 | 7 | 144287662 | 144340952 | Misassembly | NONE | 144287662 | 144340952 | 0 | OTHER | complex event - possible inversion |
| 7-297 | 7 | 146640377 | 146655590 | Misassembly | NONE | 146640377 | 146655590 | 0 | OTHER | complex event                      |
| 7-298 | 7 | 146817042 | 146901201 | Misassembly | NONE | 146817042 | 146901201 | 0 | OTHER | complex event                      |
| 7-299 | 7 | 146991170 | 147138484 | Misassembly | NONE | 146991170 | 147138484 | 0 | OTHER | complex event                      |
| 7-300 | 7 | 152598442 | 152735421 | Misassembly | NONE | 152598442 | 152735421 | 0 | OTHER | complex event                      |
| 7-301 | 7 | 152778858 | 152874537 | Misassembly | NONE | 152778858 | 152874537 | 0 | OTHER | complex event - possible inversion |
| 7-304 | 7 | 153617478 | 153736394 | Misassembly | NONE | 153617478 | 153736394 | 0 | OTHER | complex event                      |
| 7-306 | 7 | 155540150 | 155618578 | Misassembly | NONE | 155540150 | 155618578 | 0 | OTHER | complex event                      |
| 7-307 | 7 | 159259249 | 159341439 | Misassembly | NONE | 159259249 | 159341439 | 0 | OTHER | complex event                      |
| 7-309 | 7 | 160499301 | 160647938 | Misassembly | NONE | 160499301 | 160647938 | 0 | OTHER | complex event                      |
| 7-310 | 7 | 163137644 | 163211755 | Misassembly | NONE | 163137644 | 163211755 | 0 | OTHER | complex event                      |
| 7-311 | 7 | 164583411 | 164651928 | Misassembly | NONE | 164583411 | 164651928 | 0 | OTHER | complex event                      |
| 7-312 | 7 | 164699437 | 164781219 | Misassembly | NONE | 164699437 | 164781219 | 0 | OTHER | complex event                      |
| 7-313 | 7 | 165169015 | 165217033 | Misassembly | NONE | 165169015 | 165217033 | 0 | OTHER | complex event                      |
| 7-314 | 7 | 165290991 | 165308326 | Misassembly | NONE | 165290991 | 165308326 | 0 | OTHER | complex event - possible inversion |
| 7-315 | 7 | 168485694 | 168647825 | Misassembly | NONE | 168485694 | 168647825 | 0 | OTHER | complex event                      |
| 7-316 | 7 | 169072113 | 169187691 | Misassembly | NONE | 169072113 | 169187691 | 0 | OTHER | complex event                      |
| 7-318 | 7 | 170615439 | 170682997 | Misassembly | NONE | 170615439 | 170682997 | 0 | OTHER | complex event                      |
| 8-1   | 8 | 1546664   | 1625343   | Misassembly | NONE | 1546664   | 1625343   | 0 | OTHER | complex event                      |
| 8-2   | 8 | 1873856   | 1974568   | Misassembly | NONE | 1873856   | 1974568   | 0 | OTHER | complex event                      |
| 8-10  | 8 | 5641863   | 5700338   | Misassembly | NONE | 5641863   | 5700338   | 0 | OTHER | complex event                      |
| 8-12  | 8 | 5901850   | 6044753   | Misassembly | NONE | 5901850   | 6044753   | 0 | OTHER | complex event                      |
| 8-15  | 8 | 8335683   | 8524160   | Misassembly | NONE | 8335683   | 8524160   | 0 | OTHER | complex event                      |
| 8-17  | 8 | 8707739   | 8845545   | Misassembly | NONE | 8707739   | 8845545   | 0 | OTHER | complex event                      |
| 8-20  | 8 | 9127586   | 9177599   | Misassembly | NONE | 9127586   | 9177599   | 0 | OTHER | complex event                      |
| 8-21  | 8 | 9416135   | 9554601   | Misassembly | NONE | 9416135   | 9554601   | 0 | OTHER | complex event                      |
| 8-22  | 8 | 9700405   | 9891959   | Misassembly | NONE | 9700405   | 9891959   | 0 | OTHER | complex event                      |
| 8-23  | 8 | 9912264   | 10027695  | Misassembly | NONE | 9912264   | 10027695  | 0 | OTHER | complex event                      |
| 8-24  | 8 | 10164863  | 10187616  | Misassembly | NONE | 10164863  | 10187616  | 0 | OTHER | complex event                      |
| 8-25  | 8 | 10419059  | 10508175  | Misassembly | NONE | 10419059  | 10508175  | 0 | OTHER | complex event                      |
| 8-26  | 8 | 10625597  | 10909982  | Misassembly | NONE | 10625597  | 10909982  | 0 | OTHER | complex event                      |
| 8-27  | 8 | 11177456  | 11266758  | Misassembly | NONE | 11177456  | 11266758  | 0 | OTHER | complex event                      |
| 8-31  | 8 | 11768769  | 11835247  | Misassembly | NONE | 11768769  | 11835247  | 0 | OTHER | complex event                      |
| 8-32  | 8 | 11916875  | 11966228  | Misassembly | NONE | 11916875  | 11966228  | 0 | OTHER | complex event                      |
| 8-33  | 8 | 12089132  | 12167103  | Misassembly | NONE | 12089132  | 12167103  | 0 | OTHER | complex event                      |
| 8-36  | 8 | 12302214  | 12393910  | Misassembly | NONE | 12302214  | 12393910  | 0 | OTHER | complex event                      |
| 8-37  | 8 | 12503115  | 12661018  | Misassembly | NONE | 12503115  | 12661018  | 0 | OTHER | complex event                      |
| 8-39  | 8 | 13118851  | 13378192  | Misassembly | NONE | 13118851  | 13378192  | 0 | OTHER | complex event                      |
| 8-40  | 8 | 13429954  | 13650507  | Misassembly | NONE | 13429954  | 13650507  | 0 | OTHER | complex event                      |
| 8-44  | 8 | 15666199  | 15713290  | Misassembly | NONE | 15666199  | 15713290  | 0 | OTHER | complex event                      |
| 8-47  | 8 | 16165488  | 16228598  | Misassembly | NONE | 16165488  | 16228598  | 0 | OTHER | complex event                      |
| 8-50  | 8 | 16491595  | 16657269  | Misassembly | NONE | 16491595  | 16657269  | 0 | OTHER | complex event                      |
| 8-53  | 8 | 17277375  | 17399013  | Misassembly | NONE | 17277375  | 17399013  | 0 | OTHER | complex event                      |
| 8-55  | 8 | 18493597  | 18666466  | Misassembly | NONE | 18493597  | 18666466  | 0 | OTHER | complex event                      |
| 8-61  | 8 | 20458733  | 20696114  | Misassembly | NONE | 20458733  | 20696114  | 0 | OTHER | complex event                      |
| 8-62  | 8 | 20762772  | 20845782  | Misassembly | NONE | 20762772  | 20845782  | 0 | OTHER | complex event                      |
| 8-67  | 8 | 21591450  | 21650934  | Misassembly | NONE | 21591450  | 21650934  | 0 | OTHER | complex event                      |

|       |   |          |          |              |      |          |          |   |       |                                    |
|-------|---|----------|----------|--------------|------|----------|----------|---|-------|------------------------------------|
| 8-74  | 8 | 24564124 | 24620214 | Misassembled | NONE | 24564124 | 24620214 | 0 | OTHER | complex event                      |
| 8-76  | 8 | 25020752 | 25125151 | Misassembled | NONE | 25020752 | 25125151 | 0 | OTHER | complex event                      |
| 8-77  | 8 | 25239875 | 25257284 | Misassembled | NONE | 25239875 | 25257284 | 0 | OTHER | complex event                      |
| 8-79  | 8 | 25486245 | 25486260 | Misassembled | NONE | 25486245 | 25486260 | 0 | OTHER | complex event                      |
| 8-80  | 8 | 26312466 | 26417814 | Misassembled | NONE | 26312466 | 26417814 | 0 | OTHER | complex event                      |
| 8-82  | 8 | 26563633 | 26616757 | Misassembled | NONE | 26563633 | 26616757 | 0 | OTHER | complex event                      |
| 8-87  | 8 | 27375035 | 27400248 | Misassembled | NONE | 27375035 | 27400248 | 0 | OTHER | complex event                      |
| 8-88  | 8 | 27519008 | 27623242 | Misassembled | NONE | 27519008 | 27623242 | 0 | OTHER | complex event                      |
| 8-89  | 8 | 27663202 | 27749353 | Misassembled | NONE | 27663202 | 27749353 | 0 | OTHER | complex event                      |
| 8-90  | 8 | 27793269 | 27986647 | Misassembled | NONE | 27793269 | 27986647 | 0 | OTHER | complex event                      |
| 8-91  | 8 | 28014932 | 28092350 | Misassembled | NONE | 28014932 | 28092350 | 0 | OTHER | complex event                      |
| 8-92  | 8 | 28691890 | 28909937 | Misassembled | NONE | 28691890 | 28909937 | 0 | OTHER | complex event                      |
| 8-94  | 8 | 29393265 | 29496424 | Misassembled | NONE | 29393265 | 29496424 | 0 | OTHER | complex event                      |
| 8-96  | 8 | 29983370 | 30203893 | Misassembled | NONE | 29983370 | 30203893 | 0 | OTHER | complex event                      |
| 8-97  | 8 | 30387959 | 30458955 | Misassembled | NONE | 30387959 | 30458955 | 0 | OTHER | complex event                      |
| 8-99  | 8 | 32893584 | 32991675 | Misassembled | NONE | 32893584 | 32991675 | 0 | OTHER | complex event                      |
| 8-106 | 8 | 34822977 | 34933151 | Misassembled | NONE | 34822977 | 34933151 | 0 | OTHER | complex event                      |
| 8-107 | 8 | 35152867 | 35287267 | Misassembled | NONE | 35152867 | 35287267 | 0 | OTHER | complex event                      |
| 8-110 | 8 | 35631335 | 35704888 | Misassembled | NONE | 35631335 | 35704888 | 0 | OTHER | complex event - possible inversion |
| 8-111 | 8 | 35779863 | 36000150 | Misassembled | NONE | 35779863 | 36000150 | 0 | OTHER | complex event - possible inversion |
| 8-113 | 8 | 37520274 | 37642351 | Misassembled | NONE | 37520274 | 37642351 | 0 | OTHER | complex event                      |
| 8-115 | 8 | 37875816 | 37926185 | Misassembled | NONE | 37875816 | 37926185 | 0 | OTHER | complex event                      |
| 8-117 | 8 | 38244307 | 38525698 | Misassembled | NONE | 38244307 | 38525698 | 0 | OTHER | complex event                      |
| 8-120 | 8 | 38895649 | 39016148 | Misassembled | NONE | 38895649 | 39016148 | 0 | OTHER | complex event                      |
| 8-121 | 8 | 39076920 | 39167523 | Misassembled | NONE | 39076920 | 39167523 | 0 | OTHER | complex event                      |
| 8-126 | 8 | 40380870 | 40431506 | Misassembled | NONE | 40380870 | 40431506 | 0 | OTHER | complex event                      |
| 8-128 | 8 | 40867008 | 40932322 | Misassembled | NONE | 40867008 | 40932322 | 0 | OTHER | complex event                      |
| 8-129 | 8 | 40987906 | 41318106 | Misassembled | NONE | 40987906 | 41318106 | 0 | OTHER | complex event                      |
| 8-130 | 8 | 41796826 | 41825724 | Misassembled | NONE | 41796826 | 41825724 | 0 | OTHER | complex event                      |
| 8-131 | 8 | 42205358 | 42330002 | Misassembled | NONE | 42205358 | 42330002 | 0 | OTHER | complex event                      |
| 8-132 | 8 | 42450853 | 42599312 | Misassembled | NONE | 42450853 | 42599312 | 0 | OTHER | complex event                      |
| 8-133 | 8 | 42653608 | 42823670 | Misassembled | NONE | 42653608 | 42823670 | 0 | OTHER | complex event                      |
| 8-136 | 8 | 43203149 | 43430416 | Misassembled | NONE | 43203149 | 43430416 | 0 | OTHER | complex event                      |
| 8-138 | 8 | 43761151 | 43962026 | Misassembled | NONE | 43761151 | 43962026 | 0 | OTHER | complex event                      |
| 8-139 | 8 | 44306510 | 44372854 | Misassembled | NONE | 44306510 | 44372854 | 0 | OTHER | complex event                      |
| 8-141 | 8 | 44527912 | 44695718 | Misassembled | NONE | 44527912 | 44695718 | 0 | OTHER | complex event                      |
| 8-143 | 8 | 44914699 | 44995206 | Misassembled | NONE | 44914699 | 44995206 | 0 | OTHER | complex event                      |
| 8-145 | 8 | 50036780 | 50080912 | Misassembled | NONE | 50036780 | 50080912 | 0 | OTHER | complex event - possible inversion |
| 8-148 | 8 | 50742709 | 50875245 | Misassembled | NONE | 50742709 | 50875245 | 0 | OTHER | complex event                      |
| 8-149 | 8 | 50934291 | 51302170 | Misassembled | NONE | 50934291 | 51302170 | 0 | OTHER | complex event                      |
| 8-150 | 8 | 51595451 | 51786232 | Misassembled | NONE | 51595451 | 51786232 | 0 | OTHER | complex event                      |
| 8-155 | 8 | 54094165 | 54264010 | Misassembled | NONE | 54094165 | 54264010 | 0 | OTHER | complex event                      |
| 8-156 | 8 | 54503493 | 54593852 | Misassembled | NONE | 54503493 | 54593852 | 0 | OTHER | complex event                      |
| 8-160 | 8 | 55432077 | 55537885 | Misassembled | NONE | 55432077 | 55537885 | 0 | OTHER | complex event                      |
| 8-162 | 8 | 55679873 | 55706471 | Misassembled | NONE | 55679873 | 55706471 | 0 | OTHER | complex event                      |
| 8-166 | 8 | 56216677 | 56353853 | Misassembled | NONE | 56216677 | 56353853 | 0 | OTHER | complex event                      |
| 8-167 | 8 | 59199087 | 59324070 | Misassembled | NONE | 59199087 | 59324070 | 0 | OTHER | complex event                      |
| 8-168 | 8 | 59400646 | 59503989 | Misassembled | NONE | 59400646 | 59503989 | 0 | OTHER | complex event                      |
| 8-173 | 8 | 60876580 | 61052430 | Misassembled | NONE | 60876580 | 61052430 | 0 | OTHER | complex event                      |
| 8-174 | 8 | 61186016 | 61351827 | Misassembled | NONE | 61186016 | 61351827 | 0 | OTHER | complex event                      |
| 8-176 | 8 | 63507856 | 63555898 | Misassembled | NONE | 63507856 | 63555898 | 0 | OTHER | complex event                      |
| 8-177 | 8 | 63868349 | 63898028 | Misassembled | NONE | 63868349 | 63898028 | 0 | OTHER | complex event                      |
| 8-182 | 8 | 64245258 | 64406256 | Misassembled | NONE | 64245258 | 64406256 | 0 | OTHER | complex event                      |
| 8-183 | 8 | 64454855 | 64499774 | Misassembled | NONE | 64454855 | 64499774 | 0 | OTHER | complex event                      |
| 8-184 | 8 | 64627628 | 64727713 | Misassembled | NONE | 64627628 | 64727713 | 0 | OTHER | complex event                      |
| 8-186 | 8 | 65010503 | 65354778 | Misassembled | NONE | 65010503 | 65354778 | 0 | OTHER | complex event                      |
| 8-187 | 8 | 65441697 | 65547469 | Misassembled | NONE | 65441697 | 65547469 | 0 | OTHER | complex event                      |
| 8-189 | 8 | 66056913 | 66357997 | Misassembled | NONE | 66056913 | 66357997 | 0 | OTHER | complex event                      |
| 8-190 | 8 | 66507421 | 66711617 | Misassembled | NONE | 66507421 | 66711617 | 0 | OTHER | complex event                      |
| 8-192 | 8 | 68592631 | 68724398 | Misassembled | NONE | 68592631 | 68724398 | 0 | OTHER | complex event                      |
| 8-193 | 8 | 68750782 | 68880884 | Misassembled | NONE | 68750782 | 68880884 | 0 | OTHER | complex event                      |
| 8-194 | 8 | 69113334 | 69204189 | Misassembled | NONE | 69113334 | 69204189 | 0 | OTHER | complex event                      |
| 8-197 | 8 | 69943730 | 70056646 | Misassembled | NONE | 69943730 | 70056646 | 0 | OTHER | complex event                      |
| 8-203 | 8 | 71616287 | 71930268 | Misassembled | NONE | 71616287 | 71930268 | 0 | OTHER | complex event                      |
| 8-204 | 8 | 72033747 | 72342910 | Misassembled | NONE | 72033747 | 72342910 | 0 | OTHER | complex event                      |
| 8-205 | 8 | 72480209 | 72534774 | Misassembled | NONE | 72480209 | 72534774 | 0 | OTHER | complex event                      |
| 8-206 | 8 | 72614266 | 72721865 | Misassembled | NONE | 72614266 | 72721865 | 0 | OTHER | complex event                      |
| 8-207 | 8 | 73074004 | 73773360 | Misassembled | NONE | 73074004 | 73773360 | 0 | OTHER | complex event                      |
| 8-208 | 8 | 73883976 | 73920205 | Misassembled | NONE | 73883976 | 73920205 | 0 | OTHER | complex event                      |
| 8-211 | 8 | 74652532 | 74817358 | Misassembled | NONE | 74652532 | 74817358 | 0 | OTHER | complex event                      |
| 8-212 | 8 | 75261454 | 75455621 | Misassembled | NONE | 75261454 | 75455621 | 0 | OTHER | complex event                      |
| 8-213 | 8 | 75486221 | 75571789 | Misassembled | NONE | 75486221 | 75571789 | 0 | OTHER | complex event                      |
| 8-214 | 8 | 75596977 | 75863424 | Misassembled | NONE | 75596977 | 75863424 | 0 | OTHER | complex event                      |
| 8-217 | 8 | 76325466 | 76425016 | Misassembled | NONE | 76325466 | 76425016 | 0 | OTHER | complex event                      |
| 8-218 | 8 | 76624934 | 76773208 | Misassembled | NONE | 76624934 | 76773208 | 0 | OTHER | complex event                      |
| 8-220 | 8 | 76901631 | 76968560 | Misassembled | NONE | 76901631 | 76968560 | 0 | OTHER | complex event                      |
| 8-222 | 8 | 78877658 | 78946918 | Misassembled | NONE | 78877658 | 78946918 | 0 | OTHER | complex event                      |
| 8-223 | 8 | 79021564 | 79120254 | Misassembled | NONE | 79021564 | 79120254 | 0 | OTHER | complex event                      |
| 8-224 | 8 | 79237341 | 79290338 | Misassembled | NONE | 79237341 | 79290338 | 0 | OTHER | complex event                      |
| 8-225 | 8 | 79369710 | 79589296 | Misassembled | NONE | 79369710 | 79589296 | 0 | OTHER | complex event                      |
| 8-226 | 8 | 79646979 | 79671068 | Misassembled | NONE | 79646979 | 79671068 | 0 | OTHER | complex event - possible inversion |
| 8-227 | 8 | 79745883 | 79877734 | Misassembled | NONE | 79745883 | 79877734 | 0 | OTHER | complex event                      |

|       |   |           |           |             |      |           |           |   |       |                                    |
|-------|---|-----------|-----------|-------------|------|-----------|-----------|---|-------|------------------------------------|
| 8-228 | 8 | 79986934  | 80005497  | Misassembly | NONE | 79986934  | 80005497  | 0 | OTHER | complex event - possible inversion |
| 8-230 | 8 | 80303664  | 80453384  | Misassembly | NONE | 80303664  | 80453384  | 0 | OTHER | complex event                      |
| 8-231 | 8 | 80585004  | 80705381  | Misassembly | NONE | 80585004  | 80705381  | 0 | OTHER | complex event                      |
| 8-232 | 8 | 82190058  | 82323073  | Misassembly | NONE | 82190058  | 82323073  | 0 | OTHER | complex event                      |
| 8-235 | 8 | 82735368  | 82952848  | Misassembly | NONE | 82735368  | 82952848  | 0 | OTHER | complex event                      |
| 8-236 | 8 | 83051487  | 83132891  | Misassembly | NONE | 83051487  | 83132891  | 0 | OTHER | complex event                      |
| 8-237 | 8 | 83888402  | 83986506  | Misassembly | NONE | 83888402  | 83986506  | 0 | OTHER | complex event                      |
| 8-238 | 8 | 84158703  | 84224203  | Misassembly | NONE | 84158703  | 84224203  | 0 | OTHER | complex event                      |
| 8-240 | 8 | 86106736  | 86180833  | Misassembly | NONE | 86106736  | 86180833  | 0 | OTHER | complex event                      |
| 8-241 | 8 | 89208534  | 89327727  | Misassembly | NONE | 89208534  | 89327727  | 0 | OTHER | complex event                      |
| 8-243 | 8 | 89819053  | 89904772  | Misassembly | NONE | 89819053  | 89904772  | 0 | OTHER | complex event                      |
| 8-244 | 8 | 90107114  | 90228575  | Misassembly | NONE | 90107114  | 90228575  | 0 | OTHER | complex event                      |
| 8-245 | 8 | 91729824  | 91828978  | Misassembly | NONE | 91729824  | 91828978  | 0 | OTHER | complex event                      |
| 8-246 | 8 | 92037930  | 92353978  | Misassembly | NONE | 92037930  | 92353978  | 0 | OTHER | complex event                      |
| 8-247 | 8 | 92458013  | 92582824  | Misassembly | NONE | 92458013  | 92582824  | 0 | OTHER | complex event                      |
| 8-249 | 8 | 93028602  | 93172020  | Misassembly | NONE | 93028602  | 93172020  | 0 | OTHER | complex event                      |
| 8-250 | 8 | 93338591  | 93513015  | Misassembly | NONE | 93338591  | 93513015  | 0 | OTHER | complex event                      |
| 8-251 | 8 | 93552015  | 93677783  | Misassembly | NONE | 93552015  | 93677783  | 0 | OTHER | complex event                      |
| 8-252 | 8 | 97151118  | 97401067  | Misassembly | NONE | 97151118  | 97401067  | 0 | OTHER | complex event                      |
| 8-255 | 8 | 99975973  | 100027679 | Misassembly | NONE | 99975973  | 100027679 | 0 | OTHER | complex event                      |
| 8-257 | 8 | 100218316 | 100311767 | Misassembly | NONE | 100218316 | 100311767 | 0 | OTHER | complex event                      |
| 8-258 | 8 | 103839497 | 103977290 | Misassembly | NONE | 103839497 | 103977290 | 0 | OTHER | complex event                      |
| 8-260 | 8 | 107210377 | 107364564 | Misassembly | NONE | 107210377 | 107364564 | 0 | OTHER | complex event                      |
| 8-261 | 8 | 108647559 | 108841978 | Misassembly | NONE | 108647559 | 108841978 | 0 | OTHER | complex event                      |
| 8-264 | 8 | 110721961 | 110909589 | Misassembly | NONE | 110721961 | 110909589 | 0 | OTHER | complex event                      |
| 8-266 | 8 | 112616432 | 112717359 | Misassembly | NONE | 112616432 | 112717359 | 0 | OTHER | complex event                      |
| 8-267 | 8 | 112905384 | 113045842 | Misassembly | NONE | 112905384 | 113045842 | 0 | OTHER | complex event                      |
| 8-271 | 8 | 113689896 | 113805544 | Misassembly | NONE | 113689896 | 113805544 | 0 | OTHER | complex event                      |
| 8-275 | 8 | 118126613 | 118348472 | Misassembly | NONE | 118126613 | 118348472 | 0 | OTHER | complex event                      |
| 8-279 | 8 | 119149831 | 119262712 | Misassembly | NONE | 119149831 | 119262712 | 0 | OTHER | complex event                      |
| 8-282 | 8 | 119700332 | 119789456 | Misassembly | NONE | 119700332 | 119789456 | 0 | OTHER | complex event                      |
| 8-283 | 8 | 119881340 | 120003652 | Misassembly | NONE | 119881340 | 120003652 | 0 | OTHER | complex event                      |
| 8-284 | 8 | 120061980 | 120325757 | Misassembly | NONE | 120061980 | 120325757 | 0 | OTHER | complex event                      |
| 8-287 | 8 | 127340318 | 127385614 | Misassembly | NONE | 127340318 | 127385614 | 0 | OTHER | complex event                      |
| 8-290 | 8 | 128009368 | 128141938 | Misassembly | NONE | 128009368 | 128141938 | 0 | OTHER | complex event                      |
| 8-291 | 8 | 128192032 | 128291844 | Misassembly | NONE | 128192032 | 128291844 | 0 | OTHER | complex event                      |
| 8-292 | 8 | 128413277 | 128835356 | Misassembly | NONE | 128413277 | 128835356 | 0 | OTHER | complex event                      |
| 8-294 | 8 | 129020063 | 129087064 | Misassembly | NONE | 129020063 | 129087064 | 0 | OTHER | complex event                      |
| 8-297 | 8 | 129292858 | 129457157 | Misassembly | NONE | 129292858 | 129457157 | 0 | OTHER | complex event                      |
| 8-300 | 8 | 130024642 | 130091276 | Misassembly | NONE | 130024642 | 130091276 | 0 | OTHER | complex event                      |
| 8-301 | 8 | 130304038 | 130433662 | Misassembly | NONE | 130304038 | 130433662 | 0 | OTHER | complex event                      |
| 8-305 | 8 | 130892046 | 130923907 | Misassembly | NONE | 130892046 | 130923907 | 0 | OTHER | complex event - possible inversion |
| 8-307 | 8 | 131186583 | 131259339 | Misassembly | NONE | 131186583 | 131259339 | 0 | OTHER | complex event                      |
| 8-310 | 8 | 134264585 | 134348531 | Misassembly | NONE | 134264585 | 134348531 | 0 | OTHER | complex event                      |
| 8-312 | 8 | 134700127 | 134895153 | Misassembly | NONE | 134700127 | 134895153 | 0 | OTHER | complex event                      |
| 8-313 | 8 | 135022932 | 135084756 | Misassembly | NONE | 135022932 | 135084756 | 0 | OTHER | complex event                      |
| 8-315 | 8 | 135543385 | 135580206 | Misassembly | NONE | 135543385 | 135580206 | 0 | OTHER | complex event                      |
| 8-316 | 8 | 135719943 | 136005211 | Misassembly | NONE | 135719943 | 136005211 | 0 | OTHER | complex event                      |
| 8-317 | 8 | 136035527 | 136063870 | Misassembly | NONE | 136035527 | 136063870 | 0 | OTHER | complex event - possible inversion |
| 8-318 | 8 | 136096410 | 136156214 | Misassembly | NONE | 136096410 | 136156214 | 0 | OTHER | complex event                      |
| 8-321 | 8 | 136447780 | 136493647 | Misassembly | NONE | 136447780 | 136493647 | 0 | OTHER | complex event                      |
| 8-323 | 8 | 136600695 | 136676462 | Misassembly | NONE | 136600695 | 136676462 | 0 | OTHER | complex event                      |
| 8-329 | 8 | 144689711 | 144807141 | Misassembly | NONE | 144689711 | 144807141 | 0 | OTHER | complex event - possible inversion |
| 8-331 | 8 | 145364784 | 145376587 | Misassembly | NONE | 145364784 | 145376587 | 0 | OTHER | complex event - possible inversion |
| 8-335 | 8 | 148027291 | 148366181 | Misassembly | NONE | 148027291 | 148366181 | 0 | OTHER | complex event                      |
| 8-339 | 8 | 148925129 | 149088815 | Misassembly | NONE | 148925129 | 149088815 | 0 | OTHER | complex event                      |
| 8-340 | 8 | 149220481 | 149404270 | Misassembly | NONE | 149220481 | 149404270 | 0 | OTHER | complex event                      |
| 8-341 | 8 | 149452076 | 149497032 | Misassembly | NONE | 149452076 | 149497032 | 0 | OTHER | complex event                      |
| 8-342 | 8 | 149593117 | 149713181 | Misassembly | NONE | 149593117 | 149713181 | 0 | OTHER | complex event                      |
| 8-347 | 8 | 150279794 | 150391119 | Misassembly | NONE | 150279794 | 150391119 | 0 | OTHER | complex event                      |
| 8-348 | 8 | 150541951 | 150605335 | Misassembly | NONE | 150541951 | 150605335 | 0 | OTHER | complex event                      |
| 8-349 | 8 | 150638246 | 150983874 | Misassembly | NONE | 150638246 | 150983874 | 0 | OTHER | complex event                      |
| 8-352 | 8 | 158232843 | 158398200 | Misassembly | NONE | 158232843 | 158398200 | 0 | OTHER | complex event                      |
| 8-353 | 8 | 158777932 | 159098014 | Misassembly | NONE | 158777932 | 159098014 | 0 | OTHER | complex event                      |
| 8-354 | 8 | 159320170 | 159381669 | Misassembly | NONE | 159320170 | 159381669 | 0 | OTHER | complex event                      |
| 8-355 | 8 | 159469311 | 159576277 | Misassembly | NONE | 159469311 | 159576277 | 0 | OTHER | complex event                      |
| 8-356 | 8 | 159672624 | 159845231 | Misassembly | NONE | 159672624 | 159845231 | 0 | OTHER | complex event                      |
| 8-358 | 8 | 160052778 | 160176034 | Misassembly | NONE | 160052778 | 160176034 | 0 | OTHER | complex event                      |
| 8-359 | 8 | 160327809 | 160358425 | Misassembly | NONE | 160327809 | 160358425 | 0 | OTHER | complex event - possible inversion |
| 8-360 | 8 | 160704395 | 160770742 | Misassembly | NONE | 160704395 | 160770742 | 0 | OTHER | complex event                      |
| 8-361 | 8 | 160832428 | 160943608 | Misassembly | NONE | 160832428 | 160943608 | 0 | OTHER | complex event - possible inversion |
| 8-364 | 8 | 161609977 | 161737472 | Misassembly | NONE | 161609977 | 161737472 | 0 | OTHER | complex event                      |
| 8-365 | 8 | 162013864 | 162051449 | Misassembly | NONE | 162013864 | 162051449 | 0 | OTHER | complex event                      |
| 8-374 | 8 | 170778665 | 170886796 | Misassembly | NONE | 170778665 | 170886796 | 0 | OTHER | complex event                      |
| 8-379 | 8 | 171552398 | 171616634 | Misassembly | NONE | 171552398 | 171616634 | 0 | OTHER | complex event                      |

|       |   |           |           |               |      |           |           |   |       |                                    |
|-------|---|-----------|-----------|---------------|------|-----------|-----------|---|-------|------------------------------------|
| 8-380 | 8 | 172728726 | 172785782 | Misasassembly | NONE | 172728726 | 172785782 | 0 | OTHER | complex event - possible inversion |
| 8-381 | 8 | 172853476 | 172951076 | Misasassembly | NONE | 172853476 | 172951076 | 0 | OTHER | complex event - possible inversion |
| 8-382 | 8 | 173075203 | 173241632 | Misasassembly | NONE | 173075203 | 173241632 | 0 | OTHER | complex event                      |
| 8-383 | 8 | 173614491 | 173761824 | Misasassembly | NONE | 173614491 | 173761824 | 0 | OTHER | complex event                      |
| 9-3   | 9 | 4395934   | 4454559   | Misasassembly | NONE | 4395934   | 4454559   | 0 | OTHER | complex event                      |
| 9-5   | 9 | 4613504   | 4704681   | Misasassembly | NONE | 4613504   | 4704681   | 0 | OTHER | complex event                      |
| 9-6   | 9 | 5180212   | 5395851   | Misasassembly | NONE | 5180212   | 5395851   | 0 | OTHER | complex event                      |
| 9-7   | 9 | 5428415   | 5488470   | Misasassembly | NONE | 5428415   | 5488470   | 0 | OTHER | complex event                      |
| 9-8   | 9 | 5531399   | 5612394   | Misasassembly | NONE | 5531399   | 5612394   | 0 | OTHER | complex event                      |
| 9-10  | 9 | 5829773   | 5940504   | Misasassembly | NONE | 5829773   | 5940504   | 0 | OTHER | complex event                      |
| 9-13  | 9 | 9738712   | 9845008   | Misasassembly | NONE | 9738712   | 9845008   | 0 | OTHER | complex event                      |
| 9-16  | 9 | 16171472  | 16263425  | Misasassembly | NONE | 16171472  | 16263425  | 0 | OTHER | complex event                      |
| 9-23  | 9 | 20410766  | 20582389  | Misasassembly | NONE | 20410766  | 20582389  | 0 | OTHER | complex event                      |
| 9-24  | 9 | 20872949  | 21006721  | Misasassembly | NONE | 20872949  | 21006721  | 0 | OTHER | complex event                      |
| 9-26  | 9 | 21380045  | 21441792  | Misasassembly | NONE | 21380045  | 21441792  | 0 | OTHER | complex event                      |
| 9-28  | 9 | 21543234  | 21736528  | Misasassembly | NONE | 21543234  | 21736528  | 0 | OTHER | complex event                      |
| 9-32  | 9 | 24943326  | 25005845  | Misasassembly | NONE | 24943326  | 25005845  | 0 | OTHER | complex event                      |
| 9-34  | 9 | 25238171  | 25273963  | Misasassembly | NONE | 25238171  | 25273963  | 0 | OTHER | complex event                      |
| 9-35  | 9 | 25806418  | 25916299  | Misasassembly | NONE | 25806418  | 25916299  | 0 | OTHER | complex event                      |
| 9-36  | 9 | 25981113  | 26073069  | Misasassembly | NONE | 25981113  | 26073069  | 0 | OTHER | complex event - possible inversion |
| 9-37  | 9 | 26237588  | 26596613  | Misasassembly | NONE | 26237588  | 26596613  | 0 | OTHER | complex event                      |
| 9-38  | 9 | 26629249  | 26726618  | Misasassembly | NONE | 26629249  | 26726618  | 0 | OTHER | complex event                      |
| 9-39  | 9 | 26870201  | 26980870  | Misasassembly | NONE | 26870201  | 26980870  | 0 | OTHER | complex event                      |
| 9-40  | 9 | 29460411  | 29564619  | Misasassembly | NONE | 29460411  | 29564619  | 0 | OTHER | complex event                      |
| 9-43  | 9 | 30805976  | 30926946  | Misasassembly | NONE | 30805976  | 30926946  | 0 | OTHER | complex event                      |
| 9-44  | 9 | 32173954  | 32289039  | Misasassembly | NONE | 32173954  | 32289039  | 0 | OTHER | complex event                      |
| 9-45  | 9 | 32390505  | 32457660  | Misasassembly | NONE | 32390505  | 32457660  | 0 | OTHER | complex event                      |
| 9-46  | 9 | 32626500  | 33111308  | Misasassembly | NONE | 32626500  | 33111308  | 0 | OTHER | complex event                      |
| 9-48  | 9 | 33255397  | 33277999  | Misasassembly | NONE | 33255397  | 33277999  | 0 | OTHER | complex event                      |
| 9-49  | 9 | 33493530  | 33582450  | Misasassembly | NONE | 33493530  | 33582450  | 0 | OTHER | complex event                      |
| 9-51  | 9 | 34117078  | 34206159  | Misasassembly | NONE | 34117078  | 34206159  | 0 | OTHER | complex event                      |
| 9-52  | 9 | 34400646  | 34476830  | Misasassembly | NONE | 34400646  | 34476830  | 0 | OTHER | complex event                      |
| 9-53  | 9 | 34688108  | 34948173  | Misasassembly | NONE | 34688108  | 34948173  | 0 | OTHER | complex event                      |
| 9-54  | 9 | 35485306  | 35777830  | Misasassembly | NONE | 35485306  | 35777830  | 0 | OTHER | complex event                      |
| 9-55  | 9 | 35998671  | 36106414  | Misasassembly | NONE | 35998671  | 36106414  | 0 | OTHER | complex event                      |
| 9-56  | 9 | 36171653  | 36486181  | Misasassembly | NONE | 36171653  | 36486181  | 0 | OTHER | complex event                      |
| 9-58  | 9 | 37035408  | 37188585  | Misasassembly | NONE | 37035408  | 37188585  | 0 | OTHER | complex event                      |
| 9-59  | 9 | 39117710  | 39171967  | Misasassembly | NONE | 39117710  | 39171967  | 0 | OTHER | complex event                      |
| 9-61  | 9 | 39719287  | 39887673  | Misasassembly | NONE | 39719287  | 39887673  | 0 | OTHER | complex event                      |
| 9-62  | 9 | 39975058  | 40040151  | Misasassembly | NONE | 39975058  | 40040151  | 0 | OTHER | complex event - possible inversion |
| 9-64  | 9 | 40225889  | 40346332  | Misasassembly | NONE | 40225889  | 40346332  | 0 | OTHER | complex event                      |
| 9-65  | 9 | 40396092  | 40668316  | Misasassembly | NONE | 40396092  | 40668316  | 0 | OTHER | complex event                      |
| 9-67  | 9 | 40855002  | 40936279  | Misasassembly | NONE | 40855002  | 40936279  | 0 | OTHER | complex event                      |
| 9-68  | 9 | 41006742  | 41211457  | Misasassembly | NONE | 41006742  | 41211457  | 0 | OTHER | complex event                      |
| 9-69  | 9 | 41369551  | 41574641  | Misasassembly | NONE | 41369551  | 41574641  | 0 | OTHER | complex event                      |
| 9-70  | 9 | 41603580  | 41649191  | Misasassembly | NONE | 41603580  | 41649191  | 0 | OTHER | complex event - possible inversion |
| 9-71  | 9 | 41868165  | 41987613  | Misasassembly | NONE | 41868165  | 41987613  | 0 | OTHER | complex event                      |
| 9-72  | 9 | 42083514  | 42236411  | Misasassembly | NONE | 42083514  | 42236411  | 0 | OTHER | complex event                      |
| 9-73  | 9 | 42288859  | 42429477  | Misasassembly | NONE | 42288859  | 42429477  | 0 | OTHER | complex event                      |
| 9-77  | 9 | 43160504  | 43212082  | Misasassembly | NONE | 43160504  | 43212082  | 0 | OTHER | complex event                      |
| 9-78  | 9 | 43241793  | 43290050  | Misasassembly | NONE | 43241793  | 43290050  | 0 | OTHER | complex event                      |
| 9-80  | 9 | 43682764  | 43738822  | Misasassembly | NONE | 43682764  | 43738822  | 0 | OTHER | complex event                      |
| 9-81  | 9 | 43861812  | 44034745  | Misasassembly | NONE | 43861812  | 44034745  | 0 | OTHER | complex event                      |
| 9-82  | 9 | 47881938  | 47980900  | Misasassembly | NONE | 47881938  | 47980900  | 0 | OTHER | complex event                      |
| 9-83  | 9 | 48247512  | 48363088  | Misasassembly | NONE | 48247512  | 48363088  | 0 | OTHER | complex event                      |
| 9-89  | 9 | 49989756  | 50086512  | Misasassembly | NONE | 49989756  | 50086512  | 0 | OTHER | complex event                      |
| 9-91  | 9 | 50198240  | 50403332  | Misasassembly | NONE | 50198240  | 50403332  | 0 | OTHER | complex event                      |
| 9-92  | 9 | 50550768  | 50661736  | Misasassembly | NONE | 50550768  | 50661736  | 0 | OTHER | complex event                      |
| 9-95  | 9 | 52847985  | 53104250  | Misasassembly | NONE | 52847985  | 53104250  | 0 | OTHER | complex event                      |
| 9-97  | 9 | 54631541  | 54669926  | Misasassembly | NONE | 54631541  | 54669926  | 0 | OTHER | complex event                      |
| 9-100 | 9 | 55289410  | 55518958  | Misasassembly | NONE | 55289410  | 55518958  | 0 | OTHER | complex event                      |
| 9-101 | 9 | 55606300  | 55722929  | Misasassembly | NONE | 55606300  | 55722929  | 0 | OTHER | complex event                      |
| 9-108 | 9 | 58490112  | 58597222  | Misasassembly | NONE | 58490112  | 58597222  | 0 | OTHER | complex event                      |
| 9-109 | 9 | 58786241  | 58887195  | Misasassembly | NONE | 58786241  | 58887195  | 0 | OTHER | complex event                      |
| 9-112 | 9 | 59743933  | 59820600  | Misasassembly | NONE | 59743933  | 59820600  | 0 | OTHER | complex event                      |
| 9-114 | 9 | 60848127  | 61054391  | Misasassembly | NONE | 60848127  | 61054391  | 0 | OTHER | complex event                      |
| 9-115 | 9 | 61152177  | 61490537  | Misasassembly | NONE | 61152177  | 61490537  | 0 | OTHER | complex event                      |
| 9-116 | 9 | 61660588  | 61761484  | Misasassembly | NONE | 61660588  | 61761484  | 0 | OTHER | complex event                      |
| 9-117 | 9 | 63296793  | 63906095  | Misasassembly | NONE | 63296793  | 63906095  | 0 | OTHER | complex event                      |
| 9-119 | 9 | 64824135  | 64901943  | Misasassembly | NONE | 64824135  | 64901943  | 0 | OTHER | complex event                      |
| 9-121 | 9 | 65171383  | 65368081  | Misasassembly | NONE | 65171383  | 65368081  | 0 | OTHER | complex event                      |
| 9-122 | 9 | 65471003  | 65628019  | Misasassembly | NONE | 65471003  | 65628019  | 0 | OTHER | complex event                      |
| 9-123 | 9 | 65652865  | 65713742  | Misasassembly | NONE | 65652865  | 65713742  | 0 | OTHER | complex event - possible inversion |
| 9-124 | 9 | 65806164  | 65950096  | Misasassembly | NONE | 65806164  | 65950096  | 0 | OTHER | complex event                      |
| 9-125 | 9 | 66567183  | 66636200  | Misasassembly | NONE | 66567183  | 66636200  | 0 | OTHER | complex event                      |
| 9-128 | 9 | 67284698  | 67344902  | Misasassembly | NONE | 67284698  | 67344902  | 0 | OTHER | complex event                      |
| 9-130 | 9 | 67534539  | 67752935  | Misasassembly | NONE | 67534539  | 67752935  | 0 | OTHER | complex event                      |
| 9-131 | 9 | 67851467  | 68069406  | Misasassembly | NONE | 67851467  | 68069406  | 0 | OTHER | complex event                      |
| 9-133 | 9 | 68560015  | 68639558  | Misasassembly | NONE | 68560015  | 68639558  | 0 | OTHER | complex event                      |



|       |   |           |           |             |      |           |           |   |       |                                    |
|-------|---|-----------|-----------|-------------|------|-----------|-----------|---|-------|------------------------------------|
| 9-137 | 9 | 70183003  | 70219497  | Misassembly | NONE | 70183003  | 70219497  | 0 | OTHER | complex event                      |
| 9-138 | 9 | 70279133  | 70369198  | Misassembly | NONE | 70279133  | 70369198  | 0 | OTHER | complex event                      |
| 9-139 | 9 | 70416261  | 70763633  | Misassembly | NONE | 70416261  | 70763633  | 0 | OTHER | complex event                      |
| 9-141 | 9 | 71141124  | 71206753  | Misassembly | NONE | 71141124  | 71206753  | 0 | OTHER | complex event - possible inversion |
| 9-143 | 9 | 71486472  | 71638573  | Misassembly | NONE | 71486472  | 71638573  | 0 | OTHER | complex event                      |
| 9-144 | 9 | 71717732  | 71827740  | Misassembly | NONE | 71717732  | 71827740  | 0 | OTHER | complex event                      |
| 9-146 | 9 | 72132256  | 72319453  | Misassembly | NONE | 72132256  | 72319453  | 0 | OTHER | complex event                      |
| 9-148 | 9 | 72839205  | 72912378  | Misassembly | NONE | 72839205  | 72912378  | 0 | OTHER | complex event                      |
| 9-151 | 9 | 73759576  | 74156823  | Misassembly | NONE | 73759576  | 74156823  | 0 | OTHER | complex event                      |
| 9-152 | 9 | 74328703  | 74501584  | Misassembly | NONE | 74328703  | 74501584  | 0 | OTHER | complex event                      |
| 9-153 | 9 | 74836676  | 75017819  | Misassembly | NONE | 74836676  | 75017819  | 0 | OTHER | complex event                      |
| 9-154 | 9 | 75260627  | 75360278  | Misassembly | NONE | 75260627  | 75360278  | 0 | OTHER | complex event                      |
| 9-156 | 9 | 75959211  | 76040744  | Misassembly | NONE | 75959211  | 76040744  | 0 | OTHER | complex event                      |
| 9-160 | 9 | 76580334  | 76697163  | Misassembly | NONE | 76580334  | 76697163  | 0 | OTHER | complex event                      |
| 9-162 | 9 | 76857108  | 77157494  | Misassembly | NONE | 76857108  | 77157494  | 0 | OTHER | complex event                      |
| 9-163 | 9 | 77387151  | 77740344  | Misassembly | NONE | 77387151  | 77740344  | 0 | OTHER | complex event                      |
| 9-164 | 9 | 77861026  | 78073904  | Misassembly | NONE | 77861026  | 78073904  | 0 | OTHER | complex event                      |
| 9-165 | 9 | 78956514  | 79022524  | Misassembly | NONE | 78956514  | 79022524  | 0 | OTHER | complex event                      |
| 9-169 | 9 | 80465753  | 80569055  | Misassembly | NONE | 80465753  | 80569055  | 0 | OTHER | translocation                      |
| 9-170 | 9 | 80729606  | 80798357  | Misassembly | NONE | 80729606  | 80798357  | 0 | OTHER | complex event                      |
| 9-171 | 9 | 80964604  | 81026755  | Misassembly | NONE | 80964604  | 81026755  | 0 | OTHER | complex event                      |
| 9-173 | 9 | 81232111  | 81448986  | Misassembly | NONE | 81232111  | 81448986  | 0 | OTHER | complex event                      |
| 9-175 | 9 | 81703264  | 81907584  | Misassembly | NONE | 81703264  | 81907584  | 0 | OTHER | complex event                      |
| 9-176 | 9 | 82372712  | 82473945  | Misassembly | NONE | 82372712  | 82473945  | 0 | OTHER | complex event                      |
| 9-177 | 9 | 82662545  | 82935992  | Misassembly | NONE | 82662545  | 82935992  | 0 | OTHER | complex event                      |
| 9-179 | 9 | 84706079  | 85050494  | Misassembly | NONE | 84706079  | 85050494  | 0 | OTHER | complex event                      |
| 9-180 | 9 | 85117727  | 85271090  | Misassembly | NONE | 85117727  | 85271090  | 0 | OTHER | complex event                      |
| 9-181 | 9 | 85549795  | 85605629  | Misassembly | NONE | 85549795  | 85605629  | 0 | OTHER | translocation                      |
| 9-182 | 9 | 85740368  | 85848879  | Misassembly | NONE | 85740368  | 85848879  | 0 | OTHER | complex event                      |
| 9-183 | 9 | 85980854  | 86072499  | Misassembly | NONE | 85980854  | 86072499  | 0 | OTHER | complex event                      |
| 9-184 | 9 | 86121691  | 86326824  | Misassembly | NONE | 86121691  | 86326824  | 0 | OTHER | complex event                      |
| 9-186 | 9 | 86481732  | 86607029  | Misassembly | NONE | 86481732  | 86607029  | 0 | OTHER | complex event                      |
| 9-187 | 9 | 86951762  | 86984810  | Misassembly | NONE | 86951762  | 86984810  | 0 | OTHER | complex event - possible inversion |
| 9-188 | 9 | 87086831  | 87282151  | Misassembly | NONE | 87086831  | 87282151  | 0 | OTHER | complex event                      |
| 9-189 | 9 | 87467201  | 87517398  | Misassembly | NONE | 87467201  | 87517398  | 0 | OTHER | complex event                      |
| 9-191 | 9 | 87752256  | 87816328  | Misassembly | NONE | 87752256  | 87816328  | 0 | OTHER | complex event                      |
| 9-193 | 9 | 87888329  | 87915927  | Misassembly | NONE | 87888329  | 87915927  | 0 | OTHER | complex event - possible inversion |
| 9-194 | 9 | 88028857  | 88093739  | Misassembly | NONE | 88028857  | 88093739  | 0 | OTHER | complex event                      |
| 9-195 | 9 | 88648732  | 88792650  | Misassembly | NONE | 88648732  | 88792650  | 0 | OTHER | complex event                      |
| 9-196 | 9 | 88855538  | 89499307  | Misassembly | NONE | 88855538  | 89499307  | 0 | OTHER | complex event                      |
| 9-197 | 9 | 89499307  | 89630806  | Misassembly | NONE | 89499307  | 89630806  | 0 | OTHER | complex event                      |
| 9-198 | 9 | 89770093  | 89827736  | Misassembly | NONE | 89770093  | 89827736  | 0 | OTHER | complex event                      |
| 9-201 | 9 | 90286372  | 90314652  | Misassembly | NONE | 90286372  | 90314652  | 0 | OTHER | complex event - possible inversion |
| 9-202 | 9 | 90528031  | 90621150  | Misassembly | NONE | 90528031  | 90621150  | 0 | OTHER | complex event                      |
| 9-204 | 9 | 91147929  | 91225939  | Misassembly | NONE | 91147929  | 91225939  | 0 | OTHER | complex event                      |
| 9-205 | 9 | 91285573  | 91403782  | Misassembly | NONE | 91285573  | 91403782  | 0 | OTHER | complex event                      |
| 9-206 | 9 | 91606621  | 91723093  | Misassembly | NONE | 91606621  | 91723093  | 0 | OTHER | complex event                      |
| 9-207 | 9 | 91819248  | 91909852  | Misassembly | NONE | 91819248  | 91909852  | 0 | OTHER | complex event                      |
| 9-208 | 9 | 92003594  | 92119618  | Misassembly | NONE | 92003594  | 92119618  | 0 | OTHER | complex event                      |
| 9-209 | 9 | 92191644  | 92502199  | Misassembly | NONE | 92191644  | 92502199  | 0 | OTHER | complex event                      |
| 9-211 | 9 | 92698481  | 92727690  | Misassembly | NONE | 92698481  | 92727690  | 0 | OTHER | complex event                      |
| 9-212 | 9 | 92791449  | 93022315  | Misassembly | NONE | 92791449  | 93022315  | 0 | OTHER | complex event                      |
| 9-213 | 9 | 93292351  | 93694309  | Misassembly | NONE | 93292351  | 93694309  | 0 | OTHER | complex event                      |
| 9-218 | 9 | 94917982  | 95039784  | Misassembly | NONE | 94917982  | 95039784  | 0 | OTHER | complex event                      |
| 9-221 | 9 | 95342217  | 95399850  | Misassembly | NONE | 95342217  | 95399850  | 0 | OTHER | complex event                      |
| 9-223 | 9 | 95823669  | 95886396  | Misassembly | NONE | 95823669  | 95886396  | 0 | OTHER | complex event                      |
| 9-224 | 9 | 95922042  | 96049150  | Misassembly | NONE | 95922042  | 96049150  | 0 | OTHER | complex event                      |
| 9-226 | 9 | 96314115  | 96379230  | Misassembly | NONE | 96314115  | 96379230  | 0 | OTHER | complex event                      |
| 9-232 | 9 | 97489527  | 97600886  | Misassembly | NONE | 97489527  | 97600886  | 0 | OTHER | complex event                      |
| 9-236 | 9 | 98190308  | 98351193  | Misassembly | NONE | 98190308  | 98351193  | 0 | OTHER | complex event                      |
| 9-237 | 9 | 98376736  | 98471693  | Misassembly | NONE | 98376736  | 98471693  | 0 | OTHER | complex event                      |
| 9-241 | 9 | 98983101  | 99176106  | Misassembly | NONE | 98983101  | 99176106  | 0 | OTHER | complex event                      |
| 9-242 | 9 | 99360885  | 99516481  | Misassembly | NONE | 99360885  | 99516481  | 0 | OTHER | complex event                      |
| 9-243 | 9 | 99685600  | 99886500  | Misassembly | NONE | 99685600  | 99886500  | 0 | OTHER | complex event                      |
| 9-245 | 9 | 102195390 | 102330447 | Misassembly | NONE | 102195390 | 102330447 | 0 | OTHER | complex event                      |
| 9-252 | 9 | 109969544 | 110108809 | Misassembly | NONE | 109969544 | 110108809 | 0 | OTHER | complex event - possible inversion |
| 9-253 | 9 | 111447671 | 111496012 | Misassembly | NONE | 111447671 | 111496012 | 0 | OTHER | complex event                      |
| 9-255 | 9 | 112693475 | 112923549 | Misassembly | NONE | 112693475 | 112923549 | 0 | OTHER | complex event                      |
| 9-258 | 9 | 113501757 | 113627025 | Misassembly | NONE | 113501757 | 113627025 | 0 | OTHER | complex event                      |
| 9-259 | 9 | 113759197 | 113812279 | Misassembly | NONE | 113759197 | 113812279 | 0 | OTHER | complex event                      |
| 9-269 | 9 | 116947683 | 117006546 | Misassembly | NONE | 116947683 | 117006546 | 0 | OTHER | complex event                      |
| 9-271 | 9 | 119412537 | 119561710 | Misassembly | NONE | 119412537 | 119561710 | 0 | OTHER | complex event                      |
| 9-273 | 9 | 120015733 | 120097964 | Misassembly | NONE | 120015733 | 120097964 | 0 | OTHER | complex event                      |
| 9-275 | 9 | 120704657 | 120959635 | Misassembly | NONE | 120704657 | 120959635 | 0 | OTHER | complex event                      |
| 9-276 | 9 | 123035873 | 123128739 | Misassembly | NONE | 123035873 | 123128739 | 0 | OTHER | complex event                      |
| 9-278 | 9 | 124218980 | 124408380 | Misassembly | NONE | 124218980 | 124408380 | 0 | OTHER | complex event                      |
| 9-279 | 9 | 124605421 | 124902532 | Misassembly | NONE | 124605421 | 124902532 | 0 | OTHER | complex event                      |

|       |    |           |           |             |      |           |           |   |       |                                    |
|-------|----|-----------|-----------|-------------|------|-----------|-----------|---|-------|------------------------------------|
| 9-285 | 9  | 132929515 | 132984439 | Misassembly | NONE | 132929515 | 132984439 | 0 | OTHER | complex event                      |
| 9-286 | 9  | 133055754 | 133139254 | Misassembly | NONE | 133055754 | 133139254 | 0 | OTHER | complex event                      |
| 9-287 | 9  | 133280558 | 133539391 | Misassembly | NONE | 133280558 | 133539391 | 0 | OTHER | complex event                      |
| 9-288 | 9  | 133656178 | 133859528 | Misassembly | NONE | 133656178 | 133859528 | 0 | OTHER | complex event                      |
| 9-290 | 9  | 134392409 | 134484018 | Misassembly | NONE | 134392409 | 134484018 | 0 | OTHER | complex event                      |
| 9-292 | 9  | 134681115 | 135007981 | Misassembly | NONE | 134681115 | 135007981 | 0 | OTHER | complex event                      |
| 9-293 | 9  | 135058361 | 135141527 | Misassembly | NONE | 135058361 | 135141527 | 0 | OTHER | complex event                      |
| 9-295 | 9  | 135366115 | 135545931 | Misassembly | NONE | 135366115 | 135545931 | 0 | OTHER | complex event                      |
| 9-296 | 9  | 135717509 | 135791985 | Misassembly | NONE | 135717509 | 135791985 | 0 | OTHER | complex event                      |
| 9-300 | 9  | 136487106 | 136560788 | Misassembly | NONE | 136487106 | 136560788 | 0 | OTHER | complex event                      |
| 9-301 | 9  | 136769763 | 136880609 | Misassembly | NONE | 136769763 | 136880609 | 0 | OTHER | complex event                      |
| 9-304 | 9  | 137197006 | 137235621 | Misassembly | NONE | 137197006 | 137235621 | 0 | OTHER | complex event                      |
| 9-305 | 9  | 137350463 | 137445185 | Misassembly | NONE | 137350463 | 137445185 | 0 | OTHER | complex event                      |
| 9-306 | 9  | 137606890 | 137848908 | Misassembly | NONE | 137606890 | 137848908 | 0 | OTHER | complex event                      |
| 9-307 | 9  | 137908165 | 138193059 | Misassembly | NONE | 137908165 | 138193059 | 0 | OTHER | complex event                      |
| 9-308 | 9  | 138386499 | 138449363 | Misassembly | NONE | 138386499 | 138449363 | 0 | OTHER | complex event                      |
| 9-311 | 9  | 138839364 | 139031018 | Misassembly | NONE | 138839364 | 139031018 | 0 | OTHER | complex event                      |
| 9-312 | 9  | 139058230 | 139468857 | Misassembly | NONE | 139058230 | 139468857 | 0 | OTHER | complex event                      |
| 9-314 | 9  | 139578867 | 139710182 | Misassembly | NONE | 139578867 | 139710182 | 0 | OTHER | complex event                      |
| 9-315 | 9  | 139751602 | 139856865 | Misassembly | NONE | 139751602 | 139856865 | 0 | OTHER | complex event                      |
| 9-316 | 9  | 140407791 | 140561151 | Misassembly | NONE | 140407791 | 140561151 | 0 | OTHER | complex event                      |
| 9-318 | 9  | 141296837 | 141407535 | Misassembly | NONE | 141296837 | 141407535 | 0 | OTHER | complex event                      |
| 9-320 | 9  | 141824047 | 141878535 | Misassembly | NONE | 141824047 | 141878535 | 0 | OTHER | complex event                      |
| 9-321 | 9  | 141957030 | 142334894 | Misassembly | NONE | 141957030 | 142334894 | 0 | OTHER | complex event                      |
| 9-322 | 9  | 142384868 | 142622569 | Misassembly | NONE | 142384868 | 142622569 | 0 | OTHER | complex event                      |
| 9-323 | 9  | 143121427 | 143230802 | Misassembly | NONE | 143121427 | 143230802 | 0 | OTHER | complex event                      |
| 9-325 | 9  | 143670742 | 143763980 | Misassembly | NONE | 143670742 | 143763980 | 0 | OTHER | complex event                      |
| 9-326 | 9  | 143910969 | 143985788 | Misassembly | NONE | 143910969 | 143985788 | 0 | OTHER | complex event                      |
| 9-329 | 9  | 144187670 | 144386854 | Misassembly | NONE | 144187670 | 144386854 | 0 | OTHER | complex event                      |
| 9-333 | 9  | 145158803 | 145353710 | Misassembly | NONE | 145158803 | 145353710 | 0 | OTHER | complex event                      |
| 9-334 | 9  | 145379863 | 145487643 | Misassembly | NONE | 145379863 | 145487643 | 0 | OTHER | complex event                      |
| 9-335 | 9  | 145695079 | 145806852 | Misassembly | NONE | 145695079 | 145806852 | 0 | OTHER | complex event                      |
| 9-336 | 9  | 146043481 | 146120345 | Misassembly | NONE | 146043481 | 146120345 | 0 | OTHER | complex event                      |
| 9-337 | 9  | 146304764 | 146438079 | Misassembly | NONE | 146304764 | 146438079 | 0 | OTHER | complex event                      |
| 9-338 | 9  | 146544109 | 146598431 | Misassembly | NONE | 146544109 | 146598431 | 0 | OTHER | complex event                      |
| 9-340 | 9  | 146805776 | 146862748 | Misassembly | NONE | 146805776 | 146862748 | 0 | OTHER | complex event                      |
| 9-342 | 9  | 147416641 | 147667260 | Misassembly | NONE | 147416641 | 147667260 | 0 | OTHER | complex event                      |
| 9-343 | 9  | 147770691 | 148065582 | Misassembly | NONE | 147770691 | 148065582 | 0 | OTHER | complex event                      |
| 9-344 | 9  | 148473497 | 148906274 | Misassembly | NONE | 148473497 | 148906274 | 0 | OTHER | complex event                      |
| 9-345 | 9  | 149311753 | 149477093 | Misassembly | NONE | 149311753 | 149477093 | 0 | OTHER | complex event                      |
| 9-346 | 9  | 149831741 | 149994099 | Misassembly | NONE | 149831741 | 149994099 | 0 | OTHER | complex event                      |
| 9-349 | 9  | 150414117 | 150546560 | Misassembly | NONE | 150414117 | 150546560 | 0 | OTHER | complex event                      |
| 10-1  | 10 | 307952    | 346182    | Misassembly | NONE | 307952    | 346182    | 0 | OTHER | complex event                      |
| 10-7  | 10 | 996489    | 1468531   | Misassembly | NONE | 996489    | 1468531   | 0 | OTHER | complex event                      |
| 10-8  | 10 | 1722863   | 1894356   | Misassembly | NONE | 1722863   | 1894356   | 0 | OTHER | complex event                      |
| 10-9  | 10 | 2163422   | 2458511   | Misassembly | NONE | 2163422   | 2458511   | 0 | OTHER | complex event                      |
| 10-10 | 10 | 2458511   | 2735099   | Misassembly | NONE | 2458511   | 2735099   | 0 | OTHER | complex event                      |
| 10-12 | 10 | 3137189   | 3198447   | Misassembly | NONE | 3137189   | 3198447   | 0 | OTHER | complex event                      |
| 10-13 | 10 | 3367150   | 3549507   | Misassembly | NONE | 3367150   | 3549507   | 0 | OTHER | complex event                      |
| 10-14 | 10 | 3593484   | 3845811   | Misassembly | NONE | 3593484   | 3845811   | 0 | OTHER | complex event                      |
| 10-18 | 10 | 8276974   | 8362125   | Misassembly | NONE | 8276974   | 8362125   | 0 | OTHER | complex event                      |
| 10-19 | 10 | 8403918   | 8585805   | Misassembly | NONE | 8403918   | 8585805   | 0 | OTHER | complex event                      |
| 10-20 | 10 | 8965512   | 9073015   | Misassembly | NONE | 8965512   | 9073015   | 0 | OTHER | complex event                      |
| 10-21 | 10 | 9142353   | 9341981   | Misassembly | NONE | 9142353   | 9341981   | 0 | OTHER | complex event                      |
| 10-23 | 10 | 9527410   | 9582753   | Misassembly | NONE | 9527410   | 9582753   | 0 | OTHER | complex event                      |
| 10-26 | 10 | 10030758  | 10224510  | Misassembly | NONE | 10030758  | 10224510  | 0 | OTHER | complex event                      |
| 10-28 | 10 | 10393710  | 10436650  | Misassembly | NONE | 10393710  | 10436650  | 0 | OTHER | complex event                      |
| 10-31 | 10 | 15507279  | 15543751  | Misassembly | NONE | 15507279  | 15543751  | 0 | OTHER | complex event                      |
| 10-33 | 10 | 15656544  | 16135726  | Misassembly | NONE | 15656544  | 16135726  | 0 | OTHER | complex event                      |
| 10-36 | 10 | 16657318  | 16740724  | Misassembly | NONE | 16657318  | 16740724  | 0 | OTHER | complex event                      |
| 10-37 | 10 | 16834742  | 16911909  | Misassembly | NONE | 16834742  | 16911909  | 0 | OTHER | complex event                      |
| 10-38 | 10 | 17051280  | 17107847  | Misassembly | NONE | 17051280  | 17107847  | 0 | OTHER | complex event - possible inversion |
| 10-40 | 10 | 17195554  | 17276036  | Misassembly | NONE | 17195554  | 17276036  | 0 | OTHER | complex event                      |
| 10-42 | 10 | 18456599  | 18495050  | Misassembly | NONE | 18456599  | 18495050  | 0 | OTHER | complex event                      |
| 10-44 | 10 | 18642036  | 18745630  | Misassembly | NONE | 18642036  | 18745630  | 0 | OTHER | complex event                      |
| 10-46 | 10 | 18984995  | 19050423  | Misassembly | NONE | 18984995  | 19050423  | 0 | OTHER | complex event                      |
| 10-48 | 10 | 19180716  | 19232469  | Misassembly | NONE | 19180716  | 19232469  | 0 | OTHER | complex event - possible deletion  |
| 10-49 | 10 | 23131633  | 23225626  | Misassembly | NONE | 23131633  | 23225626  | 0 | OTHER | complex event                      |
| 10-51 | 10 | 23679142  | 23950047  | Misassembly | NONE | 23679142  | 23950047  | 0 | OTHER | complex event                      |
| 10-54 | 10 | 25189125  | 25560653  | Misassembly | NONE | 25189125  | 25560653  | 0 | OTHER | complex event                      |
| 10-56 | 10 | 25923999  | 26100613  | Misassembly | NONE | 25923999  | 26100613  | 0 | OTHER | complex event                      |
| 10-57 | 10 | 26313495  | 26341381  | Misassembly | NONE | 26313495  | 26341381  | 0 | OTHER | complex event                      |
| 10-59 | 10 | 28383041  | 28853832  | Misassembly | NONE | 28383041  | 28853832  | 0 | OTHER | complex event                      |
| 10-60 | 10 | 29443662  | 29512177  | Misassembly | NONE | 29443662  | 29512177  | 0 | OTHER | complex event                      |
| 10-61 | 10 | 29568715  | 29592886  | Misassembly | NONE | 29568715  | 29592886  | 0 | OTHER | complex event                      |
| 10-62 | 10 | 29630067  | 29937741  | Misassembly | NONE | 29630067  | 29937741  | 0 | OTHER | complex event                      |
| 10-65 | 10 | 30327519  | 30449156  | Misassembly | NONE | 30327519  | 30449156  | 0 | OTHER | complex event                      |
| 10-66 | 10 | 30669132  | 30726513  | Misassembly | NONE | 30669132  | 30726513  | 0 | OTHER | complex event                      |
| 10-67 | 10 | 30836736  | 30950292  | Misassembly | NONE | 30836736  | 30950292  | 0 | OTHER | complex event                      |
| 10-68 | 10 | 30990973  | 31045003  | Misassembly | NONE | 30990973  | 31045003  | 0 | OTHER | complex event                      |
| 10-69 | 10 | 31196365  | 31450568  | Misassembly | NONE | 31196365  | 31450568  | 0 | OTHER | complex event                      |
| 10-70 | 10 | 31609790  | 31656694  | Misassembly | NONE | 31609790  | 31656694  | 0 | OTHER | complex event - possible inversion |
| 10-72 | 10 | 32125893  | 32275434  | Misassembly | NONE | 32125893  | 32275434  | 0 | OTHER | complex event                      |

|        |    |           |           |            |      |           |           |   |       |                                        |
|--------|----|-----------|-----------|------------|------|-----------|-----------|---|-------|----------------------------------------|
| 10-73  | 10 | 33931462  | 34057452  | Misasembly | NONE | 33931462  | 34057452  | 0 | OTHER | complex event - possible translocation |
| 10-74  | 10 | 34185293  | 34334527  | Misasembly | NONE | 34185293  | 34334527  | 0 | OTHER | complex event                          |
| 10-78  | 10 | 40683569  | 40761763  | Misasembly | NONE | 40683569  | 40761763  | 0 | OTHER | complex event                          |
| 10-79  | 10 | 40863977  | 41074022  | Misasembly | NONE | 40863977  | 41074022  | 0 | OTHER | complex event                          |
| 10-80  | 10 | 41245374  | 41334848  | Misasembly | NONE | 41245374  | 41334848  | 0 | OTHER | complex event                          |
| 10-81  | 10 | 41625734  | 41737289  | Misasembly | NONE | 41625734  | 41737289  | 0 | OTHER | complex event                          |
| 10-83  | 10 | 42032923  | 42231728  | Misasembly | NONE | 42032923  | 42231728  | 0 | OTHER | complex event                          |
| 10-85  | 10 | 42398520  | 42471183  | Misasembly | NONE | 42398520  | 42471183  | 0 | OTHER | complex event                          |
| 10-87  | 10 | 45256115  | 45351504  | Misasembly | NONE | 45256115  | 45351504  | 0 | OTHER | complex event                          |
| 10-88  | 10 | 45545943  | 45593784  | Misasembly | NONE | 45545943  | 45593784  | 0 | OTHER | complex event                          |
| 10-89  | 10 | 45798555  | 45884029  | Misasembly | NONE | 45798555  | 45884029  | 0 | OTHER | complex event - possible insertion     |
| 10-90  | 10 | 46071497  | 46131863  | Misasembly | NONE | 46071497  | 46131863  | 0 | OTHER | complex event                          |
| 10-95  | 10 | 46844784  | 46912646  | Misasembly | NONE | 46844784  | 46912646  | 0 | OTHER | complex event - possible inversion     |
| 10-96  | 10 | 47360639  | 47448890  | Misasembly | NONE | 47360639  | 47448890  | 0 | OTHER | complex event - possible inversion     |
| 10-98  | 10 | 47928873  | 48110920  | Misasembly | NONE | 47928873  | 48110920  | 0 | OTHER | complex event                          |
| 10-99  | 10 | 48110920  | 48625940  | Misasembly | NONE | 48110920  | 48625940  | 0 | OTHER | complex event                          |
| 10-100 | 10 | 48688151  | 48728924  | Misasembly | NONE | 48688151  | 48728924  | 0 | OTHER | complex event - possible inversion     |
| 10-101 | 10 | 51314244  | 51559150  | Misasembly | NONE | 51314244  | 51559150  | 0 | OTHER | complex event                          |
| 10-102 | 10 | 51721097  | 51779483  | Misasembly | NONE | 51721097  | 51779483  | 0 | OTHER | complex event - possible inversion     |
| 10-103 | 10 | 51813427  | 51926872  | Misasembly | NONE | 51813427  | 51926872  | 0 | OTHER | complex event                          |
| 10-111 | 10 | 54230073  | 54501854  | Misasembly | NONE | 54230073  | 54501854  | 0 | OTHER | complex event                          |
| 10-112 | 10 | 54756676  | 54918883  | Misasembly | NONE | 54756676  | 54918883  | 0 | OTHER | complex event                          |
| 10-113 | 10 | 54966864  | 55109428  | Misasembly | NONE | 54966864  | 55109428  | 0 | OTHER | complex event - possible inversion     |
| 10-114 | 10 | 55265843  | 55410199  | Misasembly | NONE | 55265843  | 55410199  | 0 | OTHER | complex event                          |
| 10-115 | 10 | 55477757  | 55589065  | Misasembly | NONE | 55477757  | 55589065  | 0 | OTHER | complex event                          |
| 10-119 | 10 | 56770244  | 56912847  | Misasembly | NONE | 56770244  | 56912847  | 0 | OTHER | complex event                          |
| 10-120 | 10 | 57084867  | 57232814  | Misasembly | NONE | 57084867  | 57232814  | 0 | OTHER | complex event                          |
| 10-121 | 10 | 57843691  | 58208215  | Misasembly | NONE | 57843691  | 58208215  | 0 | OTHER | complex event                          |
| 10-122 | 10 | 58287663  | 58542763  | Misasembly | NONE | 58287663  | 58542763  | 0 | OTHER | complex event                          |
| 10-124 | 10 | 59017324  | 59086611  | Misasembly | NONE | 59017324  | 59086611  | 0 | OTHER | complex event                          |
| 10-129 | 10 | 61107959  | 61190175  | Misasembly | NONE | 61107959  | 61190175  | 0 | OTHER | complex event                          |
| 10-130 | 10 | 61210336  | 61292263  | Misasembly | NONE | 61210336  | 61292263  | 0 | OTHER | complex event                          |
| 10-132 | 10 | 61607704  | 61630953  | Misasembly | NONE | 61607704  | 61630953  | 0 | OTHER | complex event                          |
| 10-133 | 10 | 61752440  | 61844538  | Misasembly | NONE | 61752440  | 61844538  | 0 | OTHER | complex event                          |
| 10-134 | 10 | 62169203  | 62273028  | Misasembly | NONE | 62169203  | 62273028  | 0 | OTHER | complex event                          |
| 10-135 | 10 | 62328800  | 62400418  | Misasembly | NONE | 62328800  | 62400418  | 0 | OTHER | complex event - possible inversion     |
| 10-137 | 10 | 62609807  | 62670649  | Misasembly | NONE | 62609807  | 62670649  | 0 | OTHER | complex event                          |
| 10-139 | 10 | 67910529  | 68000794  | Misasembly | NONE | 67910529  | 68000794  | 0 | OTHER | complex event                          |
| 10-140 | 10 | 68262845  | 68455627  | Misasembly | NONE | 68262845  | 68455627  | 0 | OTHER | complex event                          |
| 10-144 | 10 | 69373016  | 69459989  | Misasembly | NONE | 69373016  | 69459989  | 0 | OTHER | complex event                          |
| 10-146 | 10 | 69671313  | 69826990  | Misasembly | NONE | 69671313  | 69826990  | 0 | OTHER | complex event                          |
| 10-149 | 10 | 71571045  | 71623855  | Misasembly | NONE | 71571045  | 71623855  | 0 | OTHER | complex event                          |
| 10-150 | 10 | 72058272  | 72138991  | Misasembly | NONE | 72058272  | 72138991  | 0 | OTHER | complex event - possible inversion     |
| 10-151 | 10 | 72205770  | 72264232  | Misasembly | NONE | 72205770  | 72264232  | 0 | OTHER | complex event                          |
| 10-153 | 10 | 72792519  | 72911300  | Misasembly | NONE | 72792519  | 72911300  | 0 | OTHER | complex event                          |
| 10-155 | 10 | 73276597  | 73351903  | Misasembly | NONE | 73276597  | 73351903  | 0 | OTHER | complex event                          |
| 10-156 | 10 | 73414193  | 73684485  | Misasembly | NONE | 73414193  | 73684485  | 0 | OTHER | complex event                          |
| 10-160 | 10 | 74499238  | 74592089  | Misasembly | NONE | 74499238  | 74592089  | 0 | OTHER | complex event                          |
| 10-166 | 10 | 75872438  | 75962596  | Misasembly | NONE | 75872438  | 75962596  | 0 | OTHER | complex event                          |
| 10-167 | 10 | 76096580  | 76148646  | Misasembly | NONE | 76096580  | 76148646  | 0 | OTHER | complex event                          |
| 10-169 | 10 | 76621177  | 76655428  | Misasembly | NONE | 76621177  | 76655428  | 0 | OTHER | complex event                          |
| 10-170 | 10 | 76783451  | 76819309  | Misasembly | NONE | 76783451  | 76819309  | 0 | OTHER | complex event                          |
| 10-176 | 10 | 79539151  | 79653389  | Misasembly | NONE | 79539151  | 79653389  | 0 | OTHER | complex event                          |
| 10-181 | 10 | 83030653  | 83076438  | Misasembly | NONE | 83030653  | 83076438  | 0 | OTHER | complex event                          |
| 10-182 | 10 | 83155352  | 83237982  | Misasembly | NONE | 83155352  | 83237982  | 0 | OTHER | complex event                          |
| 10-183 | 10 | 83350762  | 83526394  | Misasembly | NONE | 83350762  | 83526394  | 0 | OTHER | complex event                          |
| 10-190 | 10 | 86465518  | 86568988  | Misasembly | NONE | 86465518  | 86568988  | 0 | OTHER | complex event                          |
| 10-192 | 10 | 86730854  | 86859936  | Misasembly | NONE | 86730854  | 86859936  | 0 | OTHER | complex event                          |
| 10-195 | 10 | 87338101  | 87568468  | Misasembly | NONE | 87338101  | 87568468  | 0 | OTHER | complex event                          |
| 10-198 | 10 | 91998421  | 92048916  | Misasembly | NONE | 91998421  | 92048916  | 0 | OTHER | complex event                          |
| 10-200 | 10 | 92280688  | 92366237  | Misasembly | NONE | 92280688  | 92366237  | 0 | OTHER | complex event                          |
| 10-203 | 10 | 92888624  | 93064459  | Misasembly | NONE | 92888624  | 93064459  | 0 | OTHER | complex event                          |
| 10-208 | 10 | 97856213  | 98003015  | Misasembly | NONE | 97856213  | 98003015  | 0 | OTHER | complex event                          |
| 10-210 | 10 | 98446537  | 98555651  | Misasembly | NONE | 98446537  | 98555651  | 0 | OTHER | complex event                          |
| 10-213 | 10 | 101601915 | 101720961 | Misasembly | NONE | 101601915 | 101720961 | 0 | OTHER | complex event                          |
| 10-215 | 10 | 102386925 | 102592166 | Misasembly | NONE | 102386925 | 102592166 | 0 | OTHER | complex event                          |
| 10-216 | 10 | 102883245 | 103114669 | Misasembly | NONE | 102883245 | 103114669 | 0 | OTHER | complex event                          |
| 10-220 | 10 | 103685788 | 103807649 | Misasembly | NONE | 103685788 | 103807649 | 0 | OTHER | complex event                          |
| 10-222 | 10 | 104141804 | 104204446 | Misasembly | NONE | 104141804 | 104204446 | 0 | OTHER | complex event                          |
| 10-223 | 10 | 104340763 | 104551995 | Misasembly | NONE | 104340763 | 104551995 | 0 | OTHER | complex event                          |
| 10-229 | 10 | 105565675 | 105631898 | Misasembly | NONE | 105565675 | 105631898 | 0 | OTHER | complex event                          |
| 10-232 | 10 | 106470287 | 106728768 | Misasembly | NONE | 106470287 | 106728768 | 0 | OTHER | complex event                          |
| 10-237 | 10 | 107384061 | 107493729 | Misasembly | NONE | 107384061 | 107493729 | 0 | OTHER | complex event                          |

|        |    |           |           |             |      |           |           |   |  |  |       |                                        |
|--------|----|-----------|-----------|-------------|------|-----------|-----------|---|--|--|-------|----------------------------------------|
| 10-240 | 10 | 108145530 | 108247989 | Misassembly | NONE | 108145530 | 108247989 | 0 |  |  | OTHER | complex event                          |
| 10-244 | 10 | 108456033 | 108614170 | Misassembly | NONE | 108456033 | 108614170 | 0 |  |  | OTHER | complex event                          |
| 10-245 | 10 | 108703960 | 108740408 | Misassembly | NONE | 108703960 | 108740408 | 0 |  |  | OTHER | complex event                          |
| 10-246 | 10 | 108904594 | 109191387 | Misassembly | NONE | 108904594 | 109191387 | 0 |  |  | OTHER | complex event                          |
| 10-247 | 10 | 109274655 | 109336942 | Misassembly | NONE | 109274655 | 109336942 | 0 |  |  | OTHER | complex event - possible inversion     |
| 10-248 | 10 | 109426918 | 109486737 | Misassembly | NONE | 109426918 | 109486737 | 0 |  |  | OTHER | complex event - possible inversion     |
| 10-250 | 10 | 109755240 | 109791940 | Misassembly | NONE | 109755240 | 109791940 | 0 |  |  | OTHER | complex event                          |
| 10-251 | 10 | 109814900 | 109915263 | Misassembly | NONE | 109814900 | 109915263 | 0 |  |  | OTHER | complex event                          |
| 10-259 | 10 | 111948038 | 112119243 | Misassembly | NONE | 111948038 | 112119243 | 0 |  |  | OTHER | complex event                          |
| 10-261 | 10 | 112220085 | 112347158 | Misassembly | NONE | 112220085 | 112347158 | 0 |  |  | OTHER | complex event                          |
| 10-262 | 10 | 112443834 | 112552696 | Misassembly | NONE | 112443834 | 112552696 | 0 |  |  | OTHER | complex event                          |
| 10-266 | 10 | 112928266 | 113014218 | Misassembly | NONE | 112928266 | 113014218 | 0 |  |  | OTHER | complex event                          |
| 10-267 | 10 | 113112970 | 113209502 | Misassembly | NONE | 113112970 | 113209502 | 0 |  |  | OTHER | complex event                          |
| 10-268 | 10 | 113382233 | 113394669 | Misassembly | NONE | 113382233 | 113394669 | 0 |  |  | OTHER | complex event                          |
| 10-273 | 10 | 114199372 | 114250980 | Misassembly | NONE | 114199372 | 114250980 | 0 |  |  | OTHER | complex event                          |
| 10-274 | 10 | 114314590 | 114412501 | Misassembly | NONE | 114314590 | 114412501 | 0 |  |  | OTHER | complex event                          |
| 10-275 | 10 | 114600865 | 114706824 | Misassembly | NONE | 114600865 | 114706824 | 0 |  |  | OTHER | complex event                          |
| 10-278 | 10 | 114861558 | 114925311 | Misassembly | NONE | 114861558 | 114925311 | 0 |  |  | OTHER | complex event                          |
| 10-280 | 10 | 115484138 | 115830565 | Misassembly | NONE | 115484138 | 115830565 | 0 |  |  | OTHER | complex event                          |
| 10-281 | 10 | 115961621 | 116077310 | Misassembly | NONE | 115961621 | 116077310 | 0 |  |  | OTHER | complex event                          |
| 10-285 | 10 | 116675847 | 116716465 | Misassembly | NONE | 116675847 | 116716465 | 0 |  |  | OTHER | complex event - possible inversion     |
| 10-288 | 10 | 117098471 | 117216827 | Misassembly | NONE | 117098471 | 117216827 | 0 |  |  | OTHER | complex event                          |
| 10-292 | 10 | 117833705 | 117886791 | Misassembly | NONE | 117833705 | 117886791 | 0 |  |  | OTHER | complex event                          |
| 10-296 | 10 | 118696611 | 119006146 | Misassembly | NONE | 118696611 | 119006146 | 0 |  |  | OTHER | complex event                          |
| 10-297 | 10 | 119217437 | 119268535 | Misassembly | NONE | 119217437 | 119268535 | 0 |  |  | OTHER | complex event                          |
| 10-299 | 10 | 119931472 | 120135215 | Misassembly | NONE | 119931472 | 120135215 | 0 |  |  | OTHER | complex event                          |
| 10-301 | 10 | 124277267 | 124367994 | Misassembly | NONE | 124277267 | 124367994 | 0 |  |  | OTHER | complex event                          |
| 10-302 | 10 | 124555054 | 124734012 | Misassembly | NONE | 124555054 | 124734012 | 0 |  |  | OTHER | complex event                          |
| 10-304 | 10 | 125041743 | 125118494 | Misassembly | NONE | 125041743 | 125118494 | 0 |  |  | OTHER | complex event                          |
| 10-309 | 10 | 127567314 | 127851168 | Misassembly | NONE | 127567314 | 127851168 | 0 |  |  | OTHER | complex event                          |
| 10-310 | 10 | 130397158 | 130503577 | Misassembly | NONE | 130397158 | 130503577 | 0 |  |  | OTHER | complex event - possible translocation |
| 10-311 | 10 | 130583734 | 130644542 | Misassembly | NONE | 130583734 | 130644542 | 0 |  |  | OTHER | complex event - possible inversion     |
| 10-318 | 10 | 137344609 | 137442036 | Misassembly | NONE | 137344609 | 137442036 | 0 |  |  | OTHER | complex event                          |
| 10-320 | 10 | 141835158 | 142005167 | Misassembly | NONE | 141835158 | 142005167 | 0 |  |  | OTHER | complex event                          |
| 10-323 | 10 | 142384702 | 142424478 | Misassembly | NONE | 142384702 | 142424478 | 0 |  |  | OTHER | complex event                          |
| 10-326 | 10 | 142865914 | 142947166 | Misassembly | NONE | 142865914 | 142947166 | 0 |  |  | OTHER | complex event                          |
| 10-327 | 10 | 148503687 | 148646617 | Misassembly | NONE | 148503687 | 148646617 | 0 |  |  | OTHER | complex event                          |

Note: EC = Extra Cut, MC= Missing Cut, INS = Insertion, DEL = Deletion, and OTHER = Multiple Events
