# Supplementary material for: A Single Molecule Scaffold for the Maize Genome
Source: PubMed Central journal article supplement (PMC2774507; doi:10.1371/journal.pgen.1000711), 2009-11-20
Supplement: pgen.1000711.s004.pdf [file pgen.1000711.s004.pdf]

**FPC gap estimations based on map alignments between optical maps and the *in silico* maps of FPC contig sequence pseudomolecules and B73 RefGen\_v1 reference chromosomes**

| Chr. No. | FPC Contigs on AGP Pseudomolecule |          | Aligned Optical Map Contig | Aligned Map Segment on AGP Pseudomolecule |                                      | Aligned Map Segment on Optical Map |                               | Gap size (kb) | Difference (%) | Comments                                |
|----------|-----------------------------------|----------|----------------------------|-------------------------------------------|--------------------------------------|------------------------------------|-------------------------------|---------------|----------------|-----------------------------------------|
|          | Contig A                          | Contig B |                            | Left pseudomolecule coordinate (bp)       | Right pseudomolecule coordinate (bp) | Left optical coordinate (bp)       | Right optical coordinate (bp) |               |                |                                         |
| 1        | ctg1                              | ctg2     | OMcontig_15                | 2,296,436                                 | 2,340,298                            | 47,492,540                         | 47,452,820                    | 2.36          | 5.38           |                                         |
| 1        | ctg2                              | ctg3     | OMcontig_15                | 3,158,020                                 | 4,932,978                            | 46,639,860                         | 44,897,400                    | -32.50        | 1.83           |                                         |
| 1        | ctg3                              | ctg4     | OMcontig_15                | 5,701,470                                 | 7,069,304                            | 44,201,740                         | 42,869,790                    | -35.88        | 2.62           |                                         |
| 1        | ctg4                              | ctg5     | OMcontig_15                | 8,363,233                                 | 10,767,316                           | 41,729,520                         | 39,198,190                    | 127.25        | 5.29           |                                         |
| 1        | ctg5                              | ctg6     | OMcontig_15                | 13,072,492                                | 13,091,007                           | 36,866,810                         | 36,723,500                    | 124.80        | 674.02         |                                         |
| 1        | ctg8                              | ctg9     | OMcontig_15                | 23,361,536                                | 24,061,519                           | 26,918,510                         | 26,330,930                    | -112.40       | 16.06          |                                         |
| 1        | ctg9                              | ctg10    | OMcontig_15                | 29,507,634                                | 30,159,601                           | 21,014,080                         | 20,408,450                    | -46.34        | 7.11           |                                         |
| 1        | ctg10                             | ctg12    | OMcontig_15                | 47,372,113                                | 48,929,557                           | 3,763,240                          | 2,162,490                     | 43.31         | 2.78           |                                         |
| 1        | ctg14                             | ctg16    | OMcontig_3                 | 64,946,214                                | 65,771,847                           | 70,918,130                         | 68,003,030                    | 2089.47       | 253.07         |                                         |
| 1        | ctg16                             | ctg474   | OMcontig_3                 | 67,086,454                                | 67,932,233                           | 66,684,270                         | 68,274,340                    | see comment   |                | ctg474 is inconsistent with optical map |
| 1        | ctg474                            | ctg17    | OMcontig_3                 | 68,290,142                                | 68,474,832                           | 68,603,720                         | 65,900,220                    | see comment   |                | ctg474 is inconsistent with optical map |
| 1        | ctg17                             | ctg18    | OMcontig_3                 | 70,009,936                                | 71,051,557                           | 64,370,290                         | 63,255,930                    | 72.74         | 6.98           |                                         |
| 1        | ctg18                             | ctg19    | OMcontig_3                 | 73,505,043                                | 73,719,210                           | 60,781,400                         | 60,545,540                    | 21.69         | 10.13          |                                         |
| 1        | ctg19                             | ctg20    | OMcontig_3                 | 78,226,617                                | 78,371,392                           | 55,998,200                         | 55,618,020                    | 235.41        | 162.60         |                                         |
| 1        | ctg20                             | ctg22    | OMcontig_3                 | 84,549,950                                | 84,598,481                           | 49,548,420                         | 49,355,580                    | 144.31        | 297.35         |                                         |
| 1        | ctg22                             | ctg24    | OMcontig_3                 | 85,910,394                                | 87,407,337                           | 48,129,210                         | 42,067,180                    | see comment   |                |                                         |
| 1        | ctg24                             | ctg23    | OMcontig_3                 | 90,006,601                                | 90,254,799                           | 39,455,040                         | 47,310,750                    | see comment   |                | ctg23 is inconsistent with optical map  |
| 1        | ctg23                             | ctg26    | OMcontig_3                 | 94,205,616                                | 95,014,665                           | 43,587,330                         | 38,881,040                    | see comment   |                | ctg23 is inconsistent with optical map  |
| 1        | ctg26                             | ctg27    | OMcontig_3                 | 100,685,532                               | 100,806,270                          | 33,259,950                         | 32,872,340                    | 266.87        | 221.03         |                                         |
| 1        | ctg27                             | ctg28    | OMcontig_3                 | 107,622,378                               | 107,631,375                          | 26,333,660                         | 26,269,730                    | 54.93         | 610.57         |                                         |
| 1        | ctg28                             | ctg29    | OMcontig_3                 | 116,091,195                               | 116,647,876                          | 17,893,820                         | 17,275,340                    | 61.80         | 11.10          |                                         |
| 1        | ctg29                             | ctg471   | OMcontig_3                 | 123,417,449                               | 123,640,410                          | 10,528,810                         | 10,018,740                    | 287.11        | 128.77         |                                         |
| 1        | ctg471                            | ctg433   | OMcontig_3                 | 125,926,280                               | 126,016,224                          | 7,908,150                          | 7,651,360                     | 166.85        | 185.50         |                                         |
| 1        | ctg433                            | ctg437   | OMcontig_3                 | 131,169,897                               | 131,182,847                          | 2,626,860                          | 2,585,350                     | 28.56         | 220.54         |                                         |
| 1        | ctg437                            | ctg445   | OMcontig_0/3               |                                           |                                      |                                    |                               | see comment   |                | ctg445 is inconsistent with optical map |
| 1        | ctg445                            | ctg31    | OMcontig_3/0               |                                           |                                      |                                    |                               | see comment   |                | ctg445 is inconsistent with optical map |
| 1        | ctg31                             | ctg32    | OMcontig_0                 | 154,886,776                               | 155,128,719                          | 83,629,080                         | 83,375,750                    | 11.39         | 4.71           |                                         |
| 1        | ctg32                             | ctg480   | OMcontig_0                 | 160,166,630                               | 160,535,909                          | 78,394,270                         | 78,031,930                    | -6.94         | 1.88           |                                         |
| 1        | ctg480                            | ctg33    | OMcontig_0                 | 160,961,489                               | 161,491,607                          | 77,609,870                         | 76,801,920                    | 277.83        | 52.41          |                                         |
| 1        | ctg33                             | ctg36    | OMcontig_0                 | 168,713,351                               | 168,857,990                          | 69,536,570                         | 69,335,470                    | 56.46         | 39.04          |                                         |
| 1        | ctg36                             | ctg37    | OMcontig_0                 | 177,382,595                               | 177,824,910                          | 60,865,480                         | 60,351,220                    | 71.95         | 16.27          |                                         |
| 1        | ctg37                             | ctg15    | OMcontig_0                 | 183,618,165                               | 183,665,204                          | 54,653,140                         | 54,596,700                    | 9.40          | 19.99          |                                         |
| 1        | ctg15                             | ctg38    | OMcontig_0                 | 184,203,771                               | 184,710,610                          | 54,012,150                         | 53,496,370                    | 8.94          | 1.76           |                                         |
| 1        | ctg38                             | ctg39    | OMcontig_0                 | 190,118,999                               | 190,873,890                          | 48,183,660                         | 47,406,170                    | 22.60         | 2.99           |                                         |
| 1        | ctg39                             | ctg40    | OMcontig_0                 | 192,428,206                               | 192,466,073                          | 45,824,670                         | 45,717,850                    | 68.95         | 182.09         |                                         |
| 1        | ctg40                             | ctg41    | OMcontig_0                 | 194,251,740                               | 194,287,472                          | 43,940,870                         | 43,911,150                    | -6.01         | 16.83          |                                         |
| 1        | ctg41                             | ctg42    | OMcontig_0                 | 202,447,503                               | 202,615,135                          | 35,837,060                         | 35,033,030                    | 636.40        | 379.64         |                                         |
| 1        | ctg42                             | ctg43    | OMcontig_0                 | 204,027,614                               | 204,173,298                          | 33,610,600                         | 33,473,130                    | -8.21         | 5.64           | inversion                               |
| 1        | ctg43                             | ctg44    | OMcontig_0                 | 207,346,383                               | 207,439,651                          | 30,327,730                         | 30,127,830                    | 106.63        | 114.33         |                                         |
| 1        | ctg44                             | ctg45    | OMcontig_0                 | 221,151,978                               | 221,310,128                          | 16,427,940                         | 15,951,600                    | 318.19        | 201.20         |                                         |
| 1        | ctg45                             | ctg492   | OMcontig_0                 |                                           |                                      |                                    |                               | see comment   |                | ctg492 was inverted                     |
| 1        | ctg492                            | ctg46    | OMcontig_0                 |                                           |                                      |                                    |                               | see comment   |                | ctg492 was inverted                     |
| 1        | ctg46                             | ctg48    | OMcontig_0                 | 233,762,652                               | 234,533,045                          | 3,148,900                          | 2,558,290                     | -179.78       | 23.34          |                                         |
| 1        | ctg52                             | ctg51    | OMcontig_19                |                                           |                                      |                                    |                               | see comment   |                | ctg52 was inverted                      |
| 1        | ctg51                             | ctg54    | OMcontig_19                | 253,775,112                               | 254,020,733                          | 5,240,610                          | 5,487,970                     | 1.74          | 0.71           |                                         |
| 1        | ctg54                             | ctg56    | OMcontig_19                | 258,082,862                               | 260,196,536                          | 9,570,280                          | 11,786,800                    | 102.85        | 4.87           |                                         |
| 1        | ctg56                             | ctg59    | OMcontig_19                | 278,375,203                               | 278,390,617                          | 29,896,490                         | 30,015,660                    | 103.76        | 673.13         |                                         |
| 1        | ctg59                             | ctg60    | OMcontig_19                | 278,589,705                               | 278,689,484                          | 30,213,350                         | 30,374,860                    | 61.73         | 61.87          |                                         |
| 1        | ctg60                             | ctg61    | OMcontig_19                | 279,359,325                               | 280,928,008                          | 30,980,910                         | 32,518,500                    | -31.09        | 1.98           |                                         |

|   |        |        |               |             |             |            |            |             |          |                                                                                  |
|---|--------|--------|---------------|-------------|-------------|------------|------------|-------------|----------|----------------------------------------------------------------------------------|
| 1 | ctg61  | ctg62  | OMcontig_19   | 281,863,348 | 282,937,292 | 33,461,360 | 34,622,340 | 87.04       | 8.10     |                                                                                  |
| 1 | ctg62  | ctg63  | OMcontig_19   | 286,793,203 | 286,851,441 | 38,473,460 | 38,549,590 | 17.89       | 30.72    |                                                                                  |
| 1 | ctg63  | ctg67  | OMcontig_61   | 297,479,462 | 298,811,031 | 2,948,030  | 1,491,980  | 124.48      | 9.35     |                                                                                  |
| 2 | ctg68  | ctg69  | OMcontig_2    | 2,092,811   | 4,357,312   | 1,907,080  | 4,102,580  | -69.00      | 3.05     |                                                                                  |
| 2 | ctg69  | ctg70  | OMcontig_2    | 6,262,688   | 8,201,318   | 5,962,440  | 8,156,490  | 255.42      | 13.18    |                                                                                  |
| 2 | ctg70  | ctg71  | OMcontig_2    | 10,663,599  | 11,735,460  | 10,582,570 | 11,738,630 | 84.20       | 7.86     |                                                                                  |
| 2 | ctg71  | ctg72  | OMcontig_2    | 13,973,666  | 14,183,700  | 13,968,430 | 14,326,050 | 147.59      | 70.27    |                                                                                  |
| 2 | ctg72  | ctg74  | OMcontig_2    | 16,428,574  | 16,686,014  | 16,462,520 | 17,503,250 | 783.29      | 304.26   |                                                                                  |
| 2 | ctg76  | ctg77  | OMcontig_2    | 34,002,462  | 34,756,082  | 34,130,320 | 34,909,750 | 25.81       | 3.42     |                                                                                  |
| 2 | ctg77  | ctg78  | OMcontig_2    | 40,957,334  | 41,371,378  | 41,063,030 | 41,604,130 | 127.06      | 30.69    |                                                                                  |
| 2 | ctg78  | ctg79  | OMcontig_2    | 49,755,442  | 50,255,967  | 50,111,630 | 51,009,590 | 397.44      | 79.40    |                                                                                  |
| 2 | ctg79  | ctg80  | OMcontig_2    | 56,923,859  | 57,496,341  | 57,605,180 | 58,281,560 | 103.90      | 18.15    |                                                                                  |
| 2 | ctg80  | ctg81  | OMcontig_2    | 63,234,086  | 63,340,766  | 64,005,800 | 64,316,280 | 203.80      | 191.04   |                                                                                  |
| 2 | ctg81  | ctg451 | OMcontig_2    | 65,242,695  | 65,401,186  | 66,149,390 | 66,340,140 | 32.26       | 20.35    |                                                                                  |
| 2 | ctg451 | ctg82  | OMcontig_2    | 67,693,641  | 67,839,845  | 68,607,750 | 68,744,870 | -9.08       | 6.21     |                                                                                  |
| 2 | ctg82  | ctg302 | OMcontig_2    | 78,670,254  | 78,823,152  | 79,625,990 | 79,785,450 | 6.56        | 4.29     |                                                                                  |
| 2 | ctg302 | ctg83  | OMcontig_2    | 80,821,918  | 80,832,731  | 81,767,660 | 81,781,920 | 3.45        | 31.88    |                                                                                  |
| 2 | ctg83  | ctg85  | OMcontig_2    | 82,441,603  | 82,490,012  | 83,324,160 | 84,320,440 | 947.87      | 1958.05  |                                                                                  |
| 2 | ctg85  | ctg87  | OMcontig_2    | 83,163,664  | 83,180,187  | 85,034,480 | 87,701,310 | 2650.31     | 16040.11 |                                                                                  |
| 2 | ctg449 | ctg86  | OMcontig_41   | 94,427,027  | 94,770,430  | 9,993,490  | 9,652,900  | -2.81       | 0.82     |                                                                                  |
| 2 | ctg86  | ctg426 | OMcontig_5/2  |             |             |            |            | see comment |          | ctg426 is inconsistent with optical map                                          |
| 2 | ctg426 | ctg467 | OMcontig_2/5  |             |             |            |            | see comment |          | ctg426 is inconsistent with optical map                                          |
| 2 | ctg467 | ctg89  | OMcontig_5    | 115,145,811 | 115,449,469 | 10,016,440 | 10,341,390 | 21.29       | 7.01     |                                                                                  |
| 2 | ctg89  | ctg90  | OMcontig_5    | 133,784,864 | 133,911,579 | 28,325,120 | 28,490,320 | 38.49       | 30.37    |                                                                                  |
| 2 | ctg90  | ctg92  | OMcontig_5    | 168,521,694 | 168,605,913 | 63,135,180 | 63,254,610 | 35.21       | 41.81    |                                                                                  |
| 2 | ctg92  | ctg88  | OMcontig_5    | 172,156,479 | 172,496,182 | 66,783,310 | 67,414,490 | 291.48      | 85.80    |                                                                                  |
| 2 | ctg88  | ctg95  | OMcontig_5    | 172,569,243 | 172,766,384 | 67,483,690 | 67,695,090 | 14.26       | 7.23     |                                                                                  |
| 2 | ctg95  | ctg96  | OMcontig_5    | 174,242,688 | 174,485,114 | 69,234,940 | 69,589,120 | 111.75      | 46.10    |                                                                                  |
| 2 | ctg96  | ctg97  | OMcontig_5    | 180,479,460 | 180,649,665 | 75,543,180 | 75,715,990 | 2.61        | 1.53     |                                                                                  |
| 2 | ctg97  | ctg98  | OMcontig_5    | 181,368,840 | 181,584,567 | 76,439,910 | 76,695,330 | 39.69       | 18.40    |                                                                                  |
| 2 | ctg99  | ctg100 | OMcontig_26   | 189,880,662 | 190,476,307 | 24,973,810 | 24,287,740 | 90.43       | 15.18    |                                                                                  |
| 2 | ctg103 | ctg104 | OMcontig_26   | 201,147,049 | 202,798,345 | 13,196,570 | 11,325,120 | 220.15      | 13.33    |                                                                                  |
| 2 | ctg105 | ctg107 | OMcontig_66   | 216,668,720 | 216,860,391 | 1,518,681  | 1,345,161  | -18.15      | 9.47     |                                                                                  |
| 2 | ctg108 | ctg109 | OMcontig_39   | 228,006,919 | 228,212,397 | 6,222,470  | 6,172,360  | -155.37     | 75.61    |                                                                                  |
| 2 | ctg109 | ctg110 | OMcontig_39   | 230,963,162 | 232,984,713 | 3,446,940  | 1,152,587  | 272.80      | 13.49    |                                                                                  |
| 3 | ctg111 | ctg112 | OMcontig_13   | 7,855,691   | 9,680,999   | 47,231,330 | 45,363,460 | 42.56       | 2.33     |                                                                                  |
| 3 | ctg112 | ctg113 | OMcontig_13   | 11,724,869  | 11,800,886  | 43,308,690 | 43,221,510 | 11.16       | 14.68    |                                                                                  |
| 3 | ctg113 | ctg115 | OMcontig_13   | 18,586,901  | 18,632,798  | 36,400,060 | 36,349,210 | 4.95        | 10.79    |                                                                                  |
| 3 | ctg115 | ctg117 | OMcontig_13   | 27,119,752  | 27,525,107  | 27,898,010 | 27,445,420 | 47.24       | 11.65    |                                                                                  |
| 3 | ctg117 | ctg118 | OMcontig_13   | 46,471,424  | 46,495,468  | 8,893,650  | 8,839,840  | 29.77       | 123.80   |                                                                                  |
| 3 | ctg118 | ctg119 | OMcontig_46   | 55,889,527  | 56,330,899  | 1,508,570  | 1,956,150  | 6.21        | 1.41     |                                                                                  |
| 3 | ctg119 | ctg120 | OMcontig_46   | 63,742,207  | 63,751,015  | 9,811,740  | 9,845,790  | 25.24       | 286.58   |                                                                                  |
| 3 | ctg255 | ctg121 | OMcontig_28   |             |             |            |            | see comment |          | ctg121 was inverted, and both ctg255 and ctg121 probably should be moved to chr5 |
| 3 | ctg121 | ctg122 | OMcontig_12   | 109,416,224 | 109,902,009 | 53,563,907 | 53,127,047 | -48.93      | 10.07    |                                                                                  |
| 3 | ctg122 | ctg124 | OMcontig_12   | 121,222,467 | 121,293,078 | 41,948,057 | 41,883,347 | -5.90       | 8.36     |                                                                                  |
| 3 | ctg124 | ctg126 | OMcontig_12   | 137,449,147 | 137,504,424 | 25,733,657 | 25,603,757 | 74.62       | 135.00   |                                                                                  |
| 3 | ctg126 | ctg128 | OMcontig_12   | 143,318,664 | 143,423,711 | 19,669,747 | 19,409,567 | 155.13      | 147.68   |                                                                                  |
| 3 | ctg128 | ctg129 | OMcontig_12   | 147,632,217 | 149,220,626 | 15,126,577 | 13,521,757 | 16.41       | 1.03     |                                                                                  |
| 3 | ctg129 | ctg130 | OMcontig_12/2 |             |             |            |            | see comment |          | ctg130 is inconsistent with optical map and it should be placed on chr2          |
| 3 | ctg130 | ctg131 | OMcontig_2/12 |             |             |            |            | see comment |          | ctg130 is inconsistent with optical map and it should be placed on chr2          |
| 3 | ctg131 | ctg134 | OMcontig_11   | 172,616,049 | 172,660,261 | 46,478,220 | 46,424,270 | 9.74        | 22.03    |                                                                                  |
| 3 | ctg134 | ctg135 | OMcontig_11   | 175,045,593 | 175,128,780 | 43,846,040 | 43,601,470 | 161.38      | 194.00   |                                                                                  |
| 3 | ctg135 | ctg136 | OMcontig_11   | 177,119,332 | 177,735,296 | 41,557,850 | 40,892,550 | 49.34       | 8.01     |                                                                                  |
| 3 | ctg136 | ctg138 | OMcontig_11   | 179,389,429 | 181,383,820 | 39,222,320 | 37,252,730 | -24.80      | 1.24     |                                                                                  |
| 3 | ctg138 | ctg140 | OMcontig_11   | 190,017,142 | 193,712,706 | 28,733,280 | 25,044,140 | -6.42       | 0.17     |                                                                                  |
| 3 | ctg140 | ctg141 | OMcontig_11   | 194,481,539 | 194,558,718 | 24,315,740 | 24,150,500 | 88.06       | 114.10   |                                                                                  |

|   |        |        |               |             |             |            |            |             |        |                                                                                           |
|---|--------|--------|---------------|-------------|-------------|------------|------------|-------------|--------|-------------------------------------------------------------------------------------------|
| 3 | ctg141 | ctg142 | OMcontig_11   | 198,101,045 | 199,164,107 | 20,629,640 | 19,516,210 | 50.37       | 4.74   |                                                                                           |
| 3 | ctg142 | ctg143 | OMcontig_11   | 200,703,948 | 200,732,449 | 18,010,570 | 17,926,740 | 55.33       | 194.13 |                                                                                           |
| 3 | ctg143 | ctg144 | OMcontig_11   | 202,501,675 | 202,650,104 | 16,231,510 | 16,058,910 | 24.17       | 16.28  |                                                                                           |
| 3 | ctg144 | ctg145 | OMcontig_11   | 202,961,735 | 204,383,362 | 15,753,910 | 14,252,850 | 79.43       | 5.59   |                                                                                           |
| 3 | ctg145 | ctg147 | OMcontig_11   | 212,610,737 | 212,676,410 | 6,271,200  | 6,113,770  | 91.76       | 139.72 |                                                                                           |
| 3 | ctg147 | ctg149 | OMcontig_11   | 215,513,986 | 215,565,584 | 3,470,030  | 3,392,080  | 26.35       | 51.07  |                                                                                           |
| 3 | ctg149 | ctg150 | OMcontig_47   | 219,143,241 | 219,189,266 | 932,960    | 1,005,530  | 26.55       | 57.68  |                                                                                           |
| 3 | ctg150 | ctg151 | OMcontig_47   | 224,179,631 | 224,643,809 | 5,993,210  | 6,539,160  | 81.77       | 17.62  |                                                                                           |
| 3 | ctg151 | ctg152 | OMcontig_47   | 228,911,061 | 229,019,615 | 10,649,220 | 11,164,160 | 406.39      | 374.36 |                                                                                           |
| 4 | ctg156 | ctg157 | OMcontig_44   | 11,195,836  | 11,299,399  | 5,579,280  | 5,432,920  | 42.80       | 41.32  |                                                                                           |
| 4 | ctg158 | ctg159 | OMcontig_44   | 14,080,312  | 14,627,603  | 2,791,010  | 1,846,670  | 397.05      | 72.55  |                                                                                           |
| 4 | ctg160 | ctg531 | OMcontig_24   | 21,284,969  | 22,765,583  | 5,477,060  | 7,104,460  | 146.79      | 9.91   |                                                                                           |
| 4 | ctg531 | ctg162 | OMcontig_24   | 23,498,024  | 25,165,597  | 7,835,250  | 9,586,050  | 83.23       | 4.99   |                                                                                           |
| 4 | ctg162 | ctg163 | OMcontig_24   | 25,939,539  | 27,207,385  | 10,352,710 | 11,542,650 | -77.91      | 6.14   |                                                                                           |
| 4 | ctg163 | ctg164 | OMcontig_24   | 31,295,087  | 32,122,023  | 15,534,980 | 16,351,830 | -10.09      | 1.22   |                                                                                           |
| 4 | ctg435 | ctg167 | OMcontig_9/40 |             |             |            |            | see comment |        | ctg435 is inconsistent with optical map                                                   |
| 4 | ctg190 | ctg165 | OMcontig_9    | 62,689,571  | 62,771,817  | 52,379,546 | 52,274,276 | 23.02       | 27.99  |                                                                                           |
| 4 | ctg165 | ctg166 | OMcontig_9    | 69,370,536  | 69,443,116  | 45,661,166 | 45,580,766 | 7.82        | 10.77  |                                                                                           |
| 4 | ctg166 | ctg172 | OMcontig_9    | 74,962,898  | 75,024,205  | 40,059,166 | 39,940,106 | 57.75       | 94.20  |                                                                                           |
| 4 | ctg172 | ctg174 | OMcontig_9    | 84,910,852  | 85,235,127  | 30,016,816 | 29,653,356 | 39.19       | 12.08  |                                                                                           |
| 4 | ctg174 | ctg168 | OMcontig_9    | 88,230,589  | 88,269,671  | 26,660,406 | 26,508,836 | 112.49      | 287.83 |                                                                                           |
| 4 | ctg168 | ctg444 | OMcontig_9    | 90,959,045  | 91,169,866  | 23,766,706 | 23,495,416 | 60.47       | 28.68  |                                                                                           |
| 4 | ctg444 | ctg169 | OMcontig_9    | 92,389,508  | 92,519,189  | 22,224,696 | 22,007,606 | 87.41       | 67.40  |                                                                                           |
| 4 | ctg170 | ctg171 | OMcontig_29   | 112,830,572 | 112,979,193 | 9,244,360  | 9,437,260  | 44.28       | 29.79  |                                                                                           |
| 4 | ctg173 | ctg175 | OMcontig_1    | 131,026,444 | 132,034,586 | 93,873,480 | 93,002,190 | -136.85     | 13.57  |                                                                                           |
| 4 | ctg175 | ctg176 | OMcontig_1    | 132,258,626 | 133,494,003 | 92,781,080 | 91,644,620 | -98.92      | 8.01   |                                                                                           |
| 4 | ctg176 | ctg179 | OMcontig_1    | 140,847,675 | 140,927,017 | 84,435,550 | 84,307,370 | 48.84       | 61.55  |                                                                                           |
| 4 | ctg179 | ctg246 | OMcontig_1    | 148,569,067 | 148,717,110 | 76,766,490 | 76,561,190 | 57.26       | 38.68  |                                                                                           |
| 4 | ctg246 | ctg181 | OMcontig_1    | 151,072,530 | 151,206,230 | 74,142,200 | 74,057,890 | -49.39      | 36.94  |                                                                                           |
| 4 | ctg181 | ctg182 | OMcontig_1    | 158,772,110 | 158,932,700 | 66,797,000 | 66,617,040 | 19.37       | 12.06  |                                                                                           |
| 4 | ctg182 | ctg184 | OMcontig_1    | 180,895,632 | 181,328,361 | 45,190,480 | 44,342,740 | 415.01      | 95.91  |                                                                                           |
| 4 | ctg184 | ctg183 | OMcontig_1/9  |             |             |            |            | see comment |        | ctg183 is inconsistent with optical map, and should be moved to between ctg169 and ctg171 |
| 4 | ctg183 | ctg185 | OMcontig_9/1  |             |             |            |            | see comment |        | ctg183 is inconsistent with optical map, and should be moved to between ctg169 and ctg171 |
| 4 | ctg185 | ctg187 | OMcontig_1    | 193,466,648 | 194,077,875 | 38,870,700 | 37,601,190 | 658.28      | 107.70 | containing two FPC gaps                                                                   |
| 4 | ctg187 | ctg188 | OMcontig_1    | 195,703,159 | 198,132,364 | 36,016,580 | 33,621,140 | -33.77      | 1.39   |                                                                                           |
| 4 | ctg188 | ctg191 | OMcontig_1    | 204,545,880 | 204,676,170 | 27,308,490 | 27,171,010 | 7.19        | 5.52   |                                                                                           |
| 4 | ctg191 | ctg194 | OMcontig_1    | 205,875,738 | 205,926,049 | 25,966,980 | 25,840,980 | 75.69       | 150.44 |                                                                                           |
| 4 | ctg194 | ctg193 | OMcontig_1    | 208,397,832 | 208,495,946 | 23,467,420 | 23,276,290 | 93.02       | 94.80  |                                                                                           |
| 4 | ctg193 | ctg469 | OMcontig_1    | 214,501,403 | 214,864,319 | 17,195,900 | 16,813,060 | 19.92       | 5.49   |                                                                                           |
| 4 | ctg469 | ctg192 | OMcontig_1    | 216,994,211 | 217,063,033 | 14,547,480 | 13,951,200 | 527.46      | 766.41 |                                                                                           |
| 4 | ctg192 | ctg195 | OMcontig_1    | 218,424,730 | 218,555,943 | 12,638,860 | 12,473,950 | 33.70       | 25.68  |                                                                                           |
| 4 | ctg195 | ctg127 | OMcontig_1    | 220,116,118 | 220,589,622 | 10,953,410 | 10,449,110 | 30.80       | 6.50   |                                                                                           |
| 4 | ctg127 | ctg196 | OMcontig_1    | 224,516,935 | 224,599,894 | 6,492,450  | 6,310,330  | 99.16       | 119.53 |                                                                                           |
| 4 | ctg199 | ctg198 | OMcontig_38   | 236,512,282 | 236,625,418 | 6,131,320  | 6,285,160  | 40.70       | 35.98  |                                                                                           |
| 4 | ctg198 | ctg200 | OMcontig_38   | 238,426,899 | 238,434,708 | 8,084,860  | 8,106,070  | 13.40       | 171.61 |                                                                                           |
| 4 | ctg200 | ctg201 | OMcontig_38   | 240,959,668 | 241,014,588 | 10,628,400 | 10,712,290 | 28.97       | 52.75  |                                                                                           |
| 4 | ctg201 | ctg202 | OMcontig_38   | 244,050,843 | 244,075,845 | 13,775,720 | 13,852,420 | 51.70       | 206.78 |                                                                                           |
| 4 | ctg202 | ctg203 | OMcontig_38   | 245,685,047 | 246,033,540 | 15,432,800 | 15,880,400 | 99.11       | 28.44  |                                                                                           |
| 5 | ctg204 | ctg205 | OMcontig_7    | 5,241,344   | 5,501,379   | 5,644,920  | 5,958,740  | 53.79       | 20.68  |                                                                                           |
| 5 | ctg205 | ctg206 | OMcontig_7    | 5,894,810   | 6,136,813   | 6,359,020  | 6,677,410  | 76.39       | 31.56  |                                                                                           |
| 5 | ctg206 | ctg207 | OMcontig_7    | 6,329,384   | 7,932,627   | 6,879,191  | 8,559,590  | 77.16       | 4.81   |                                                                                           |
| 5 | ctg207 | ctg209 | OMcontig_7    | 11,181,371  | 11,704,297  | 11,697,110 | 12,327,950 | 107.91      | 20.64  |                                                                                           |
| 5 | ctg209 | ctg210 | OMcontig_7    | 13,561,031  | 16,317,555  | 14,086,880 | 17,054,890 | 211.49      | 7.67   |                                                                                           |
| 5 | ctg211 | ctg212 | OMcontig_7    | 20,250,693  | 21,605,532  | 21,095,380 | 22,499,960 | 49.74       | 3.67   |                                                                                           |
| 5 | ctg212 | ctg215 | OMcontig_7    | 28,064,412  | 28,996,835  | 29,012,630 | 30,679,610 | 734.56      | 78.78  |                                                                                           |
| 5 | ctg215 | ctg216 | OMcontig_7    | 30,464,929  | 30,550,161  | 32,174,410 | 32,322,040 | 62.40       | 73.21  |                                                                                           |

|   |        |        |                |             |             |            |            |             |         |                                                                        |
|---|--------|--------|----------------|-------------|-------------|------------|------------|-------------|---------|------------------------------------------------------------------------|
| 5 | ctg216 | ctg217 | OMcontig_7     | 31,229,224  | 31,239,702  | 32,985,080 | 33,026,930 | 31.37       | 299.41  |                                                                        |
| 5 | ctg217 | ctg218 | OMcontig_7     | 37,657,014  | 37,872,290  | 39,444,800 | 39,720,820 | 60.74       | 28.22   |                                                                        |
| 5 | ctg218 | ctg486 | OMcontig_7     | 45,027,210  | 45,569,841  | 46,836,950 | 47,487,940 | 108.36      | 19.97   |                                                                        |
| 5 | ctg486 | ctg219 | OMcontig_7     | 45,694,265  | 45,720,961  | 47,608,230 | 47,645,990 | 11.06       | 41.44   |                                                                        |
| 5 | ctg219 | ctg220 | OMcontig_7     | 54,555,455  | 54,641,120  | 56,416,590 | 56,559,150 | 56.90       | 66.42   |                                                                        |
| 5 | ctg220 | ctg221 | OMcontig_7     | 61,347,898  | 62,768,236  | 63,253,840 | 64,724,900 | 50.72       | 3.57    |                                                                        |
| 5 | ctg221 | ctg223 | OMcontig_7     | 62,886,523  | 64,221,427  | 64,831,580 | 66,236,260 | 69.78       | 5.23    |                                                                        |
| 5 | ctg223 | ctg225 | OMcontig_22    | 76,887,098  | 77,689,306  | 28,229,360 | 27,446,830 | -19.68      | 2.45    |                                                                        |
| 5 | ctg225 | ctg227 | OMcontig_22    | 86,686,634  | 89,284,128  | 18,631,260 | 16,056,360 | -22.59      | 0.87    |                                                                        |
| 5 | ctg227 | ctg228 | OMcontig_22    | 94,388,047  | 94,638,979  | 10,935,320 | 10,637,200 | 47.19       | 18.81   |                                                                        |
| 5 | ctg228 | ctg180 | OMcontig_22    | 99,384,495  | 99,625,602  | 6,048,360  | 5,799,140  | 8.11        | 3.36    |                                                                        |
| 5 | ctg231 | ctg230 | OMcontig_14    | 121,329,069 | 121,366,997 | 2,349,500  | 2,413,650  | 26.22       | 69.14   |                                                                        |
| 5 | ctg230 | ctg494 | OMcontig_14    | 123,495,332 | 123,551,107 | 4,519,840  | 4,587,740  | 12.13       | 21.74   |                                                                        |
| 5 | ctg494 | ctg233 | OMcontig_14    | 126,515,455 | 126,724,214 | 7,520,790  | 7,856,670  | 127.12      | 60.89   |                                                                        |
| 5 | ctg233 | ctg234 | OMcontig_14    | 129,744,256 | 130,128,229 | 10,878,780 | 11,280,360 | 17.61       | 4.59    |                                                                        |
| 5 | ctg234 | ctg237 | OMcontig_14    | 160,246,834 | 161,015,609 | 40,986,060 | 41,818,850 | 64.02       | 8.33    |                                                                        |
| 5 | ctg237 | ctg238 | OMcontig_14    | 163,302,080 | 163,317,808 | 43,968,150 | 44,002,500 | 18.62       | 118.40  |                                                                        |
| 5 | ctg238 | ctg241 | OMcontig_25    |             |             |            |            | see comment |         | ctg241 was inverted                                                    |
| 5 | ctg241 | ctg242 | OMcontig_25    |             |             |            |            | see comment |         | ctg241 was inverted                                                    |
| 5 | ctg242 | ctg244 | OMcontig_25    | 182,077,315 | 184,266,280 | 15,787,600 | 17,925,270 | -51.30      | 2.34    |                                                                        |
| 5 | ctg244 | ctg245 | OMcontig_25    | 185,986,602 | 186,693,022 | 19,724,700 | 20,549,470 | 118.35      | 16.75   |                                                                        |
| 5 | ctg245 | ctg247 | OMcontig_25    | 188,898,824 | 190,173,796 | 22,742,460 | 24,112,280 | 94.85       | 7.44    | across two FPC gaps                                                    |
| 5 | ctg249 | ctg250 | OMcontig_33    | 195,765,167 | 196,454,338 | 21,512,820 | 20,793,700 | 29.95       | 4.35    |                                                                        |
| 5 | ctg250 | ctg251 | OMcontig_33    | 202,382,565 | 204,705,646 | 14,878,610 | 12,178,570 | 376.96      | 16.23   |                                                                        |
| 5 | ctg251 | ctg253 | OMcontig_33    | 206,721,054 | 208,100,861 | 10,131,520 | 9,024,470  | -272.76     | 19.77   | across two FPC gaps                                                    |
| 5 | ctg253 | ctg254 | OMcontig_33    | 212,424,733 | 212,432,549 | 4,824,490  | 4,705,530  | 111.14      | 1422.01 |                                                                        |
| 6 | ctg256 | ctg257 | OMcontig_48    | 677,441     | 2,680,267   | 892,250    | 2,867,480  | -27.60      | 1.38    |                                                                        |
| 6 | ctg257 | ctg259 | OMcontig_48    | 4,857,743   | 5,499,125   | 5,065,210  | 6,423,320  | 716.73      | 111.75  |                                                                        |
| 6 | ctg259 | ctg260 | OMcontig_48    | 5,992,909   | 8,182,429   | 5,971,730  | 8,668,310  | 507.06      | 23.16   |                                                                        |
| 6 | ctg261 | ctg262 | OMcontig_30    | 13,272,950  | 13,728,613  | 3,631,070  | 4,120,240  | 33.51       | 7.35    |                                                                        |
| 6 | ctg262 | ctg438 | OMcontig_30/67 |             |             |            |            | see comment |         | ctg438 is inconsistent with optical map, and should be close to ctg263 |
| 6 | ctg438 | ctg268 | OMcontig_67/30 |             |             |            |            | see comment |         | ctg438 is inconsistent with optical map, and should be close to ctg263 |
| 6 | ctg268 | ctg267 | OMcontig_30    | 31,722,729  | 31,761,408  | 18,901,660 | 18,981,960 | 41.62       | 107.61  |                                                                        |
| 6 | ctg267 | ctg266 | OMcontig_60    |             |             |            |            | see comment |         | ctg266 was inverted                                                    |
| 6 | ctg265 | ctg269 | OMcontig_36    | 63,738,835  | 63,854,627  | 6,515,020  | 5,015,440  | 1383.79     | 1195.06 |                                                                        |
| 6 | ctg269 | ctg270 | OMcontig_34    | 75,309,432  | 75,445,366  | 14,739,240 | 14,553,900 | 49.41       | 36.35   |                                                                        |
| 6 | ctg270 | ctg271 | OMcontig_34    | 83,525,829  | 84,672,272  | 6,249,540  | 5,489,520  | -386.42     | 33.71   |                                                                        |
| 6 | ctg271 | ctg442 | OMcontig_53/36 |             |             |            |            | see comment |         | ctg442 does not belong here                                            |
| 6 | ctg442 | ctg272 | OMcontig_36/53 |             |             |            |            | see comment |         | ctg442 does not belong here                                            |
| 6 | ctg272 | ctg273 | OMcontig_53    | 94,772,875  | 96,138,568  | 3,705,720  | 5,224,400  | 152.99      | 11.20   |                                                                        |
| 6 | ctg274 | ctg276 | OMcontig_6     | 102,836,731 | 104,113,351 | 3,575,800  | 4,845,090  | -7.33       | 0.57    |                                                                        |
| 6 | ctg280 | ctg281 | OMcontig_6     | 111,438,793 | 111,959,926 | 11,568,200 | 13,021,660 | 932.33      | 178.90  |                                                                        |
| 6 | ctg281 | ctg282 | OMcontig_6     | 129,103,243 | 129,337,413 | 29,803,990 | 30,090,450 | 52.29       | 22.33   |                                                                        |
| 6 | ctg282 | ctg283 | OMcontig_6     | 131,492,867 | 132,489,966 | 32,257,940 | 33,288,980 | 33.94       | 3.40    |                                                                        |
| 6 | ctg283 | ctg284 | OMcontig_6     | 140,067,667 | 140,116,466 | 41,044,880 | 41,140,640 | 46.96       | 96.23   |                                                                        |
| 6 | ctg284 | ctg285 | OMcontig_6     | 141,884,936 | 142,759,446 | 42,879,120 | 43,705,390 | -48.24      | 5.52    |                                                                        |
| 6 | ctg285 | ctg286 | OMcontig_6     | 149,890,187 | 149,933,248 | 50,779,370 | 50,839,200 | 16.77       | 38.94   |                                                                        |
| 6 | ctg286 | ctg287 | OMcontig_6     | 150,594,349 | 150,815,584 | 51,506,240 | 51,722,950 | -4.53       | 2.05    |                                                                        |
| 6 | ctg287 | ctg289 | OMcontig_6     | 164,004,029 | 164,209,396 | 65,259,160 | 65,454,420 | -10.11      | 4.92    |                                                                        |
| 6 | ctg289 | ctg291 | OMcontig_6     |             |             |            |            | see comment |         | ctg291 was inverted                                                    |
| 7 | ctg487 | ctg296 | OMcontig_20    | 6,146,406   | 6,186,478   | 6,457,260  | 6,507,280  | 9.95        | 24.83   |                                                                        |
| 7 | ctg296 | ctg297 | OMcontig_20    | 14,298,481  | 15,083,190  | 14,608,990 | 15,471,860 | 78.16       | 9.96    |                                                                        |
| 7 | ctg297 | ctg298 | OMcontig_20    | 18,878,117  | 19,689,853  | 19,358,820 | 20,446,840 | 276.28      | 34.04   |                                                                        |
| 7 | ctg298 | ctg299 | OMcontig_20/57 |             |             |            |            | see comment |         | ctg299 is chimeric, and                                                |
| 7 | ctg299 | ctg300 | OMcontig_20    | 32,685,673  | 33,853,584  | 31,042,100 | 32,270,490 | 60.48       | 5.18    |                                                                        |
| 7 | ctg300 | ctg301 | OMcontig_20    | 41,113,896  | 41,350,012  | 39,559,900 | 39,892,430 | 96.41       | 40.83   |                                                                        |
| 7 | ctg301 | ctg456 | OMcontig_43    | 52,438,573  | 53,945,650  | 8,436,320  | 11,582,660 | 1639.26     | 108.77  |                                                                        |

|   |        |        |                |             |             |            |            |             |        |                                                                                             |
|---|--------|--------|----------------|-------------|-------------|------------|------------|-------------|--------|---------------------------------------------------------------------------------------------|
| 7 | ctg456 | ctg303 | OMcontig_43    |             |             |            |            | see comment |        | ctg303 should be moved to between ctg301 and ctg456                                         |
| 7 | ctg459 | ctg470 | OMcontig_10    | 60,316,911  | 60,442,049  | 55,448,078 | 55,218,978 | 103.96      | 83.08  |                                                                                             |
| 7 | ctg470 | ctg304 | OMcontig_10    | 67,899,483  | 67,950,876  | 47,627,718 | 47,461,398 | 114.93      | 223.62 |                                                                                             |
| 7 | ctg304 | ctg306 | OMcontig_10    | 74,217,723  | 74,592,159  | 41,146,318 | 40,885,798 | -113.92     | 30.42  | across two FPC gaps                                                                         |
| 7 | ctg307 | ctg430 | OMcontig_10/40 |             |             |            |            | see comment |        | ctg430 does not belong here                                                                 |
| 7 | ctg430 | ctg309 | OMcontig_40/10 |             |             |            |            | see comment |        | ctg430 does not belong here                                                                 |
| 7 | ctg309 | ctg311 | OMcontig_10    | 103,055,213 | 105,508,652 | 18,063,678 | 15,594,248 | 15.99       | 0.65   |                                                                                             |
| 7 | ctg311 | ctg312 | OMcontig_10    | 107,670,617 | 108,243,012 | 13,431,148 | 12,798,638 | 60.12       | 10.50  |                                                                                             |
| 7 | ctg312 | ctg313 | OMcontig_10    | 111,277,679 | 113,068,923 | 9,767,688  | 7,555,098  | 421.35      | 23.52  |                                                                                             |
| 7 | ctg313 | ctg315 | OMcontig_10    | 115,167,515 | 115,364,619 | 5,423,598  | 5,122,398  | 104.10      | 52.81  |                                                                                             |
| 7 | ctg315 | ctg316 | OMcontig_10    | 117,908,711 | 118,861,024 | 2,616,738  | 1,553,418  | 111.01      | 11.66  |                                                                                             |
| 7 | ctg317 | ctg318 | OMcontig_27    | 121,768,417 | 122,395,154 | 23,663,430 | 22,932,460 | 104.23      | 16.63  |                                                                                             |
| 7 | ctg318 | ctg320 | OMcontig_27    | 132,333,743 | 133,147,706 | 15,520,590 | 12,088,690 | 2617.94     | 321.63 |                                                                                             |
| 7 | ctg322 | ctg324 | OMcontig_31    | 156,530,582 | 156,554,984 | 9,188,580  | 9,232,950  | 19.97       | 81.83  |                                                                                             |
| 7 | ctg324 | ctg325 | OMcontig_31    | 156,596,731 | 157,297,750 | 9,273,020  | 10,023,040 | 49.00       | 6.99   |                                                                                             |
| 7 | ctg325 | ctg501 | OMcontig_31    | 169,591,070 | 170,682,997 | 22,162,270 | 23,316,330 | 62.13       | 5.69   |                                                                                             |
| 8 | ctg326 | ctg327 | OMcontig_16    | 16,267,813  | 16,299,772  | 16,516,960 | 16,628,040 | 79.12       | 247.57 |                                                                                             |
| 8 | ctg327 | ctg328 | OMcontig_16    |             |             |            |            | see comment |        | ctg328 was inverted                                                                         |
| 8 | ctg328 | ctg329 | OMcontig_16    |             |             |            |            | see comment |        | ctg328 was inverted                                                                         |
| 8 | ctg329 | ctg330 | OMcontig_16    | 25,809,425  | 26,618,156  | 26,177,990 | 28,224,690 | 1237.97     | 153.08 |                                                                                             |
| 8 | ctg331 | ctg334 | OMcontig_16    | 37,520,274  | 39,179,273  | 38,027,290 | 39,699,690 | 13.40       | 0.81   |                                                                                             |
| 8 | ctg332 | ctg343 | OMcontig_4     | 51,995,210  | 53,199,821  | 80,133,560 | 78,886,100 | 42.85       | 3.56   |                                                                                             |
| 8 | ctg343 | ctg333 | OMcontig_4     | 56,216,677  | 56,353,853  | 75,890,720 | 75,783,150 | -29.61      | 21.58  |                                                                                             |
| 8 | ctg333 | ctg457 | OMcontig_4/16  |             |             |            |            | see comment |        | ctg457 is inconsistent with optical map and it should be moved to between ctg334 and ctg332 |
| 8 | ctg457 | ctg335 | OMcontig_16/4  |             |             |            |            | see comment |        | ctg457 is inconsistent with optical map and it should be moved to between ctg334 and ctg332 |
| 8 | ctg335 | ctg336 | OMcontig_4     | 62,753,948  | 62,998,937  | 71,680,210 | 70,815,730 | 619.49      | 252.86 |                                                                                             |
| 8 | ctg336 | ctg339 | OMcontig_4     | 71,064,976  | 71,154,696  | 62,578,740 | 62,449,520 | 39.50       | 44.03  |                                                                                             |
| 8 | ctg339 | ctg428 | OMcontig_4/No  |             |             |            |            | see comment |        | ctg428 does not belong here                                                                 |
| 8 | ctg428 | ctg344 | OMcontig_NO/4  |             |             |            |            | see comment |        | ctg428 does not belong here                                                                 |
| 8 | ctg344 | ctg338 | OMcontig_4     | 80,303,664  | 80,585,004  | 53,806,960 | 53,455,520 | 70.10       | 24.92  |                                                                                             |
| 8 | ctg338 | ctg337 | OMcontig_4     |             |             |            |            | see comment |        | ctg337 was inverted                                                                         |
| 8 | ctg337 | ctg340 | OMcontig_4     |             |             |            |            | see comment |        | ctg337 was inverted                                                                         |
| 8 | ctg340 | ctg345 | OMcontig_4     | 95,445,064  | 97,295,447  | 38,906,760 | 36,761,180 | 295.20      | 15.95  |                                                                                             |
| 8 | ctg347 | ctg348 | OMcontig_4     | 104,065,712 | 105,670,974 | 29,712,390 | 27,995,280 | 111.85      | 6.97   |                                                                                             |
| 8 | ctg348 | ctg349 | OMcontig_4     | 107,564,799 | 108,548,041 | 26,054,170 | 24,866,380 | 204.55      | 20.80  |                                                                                             |
| 8 | ctg349 | ctg350 | OMcontig_4     | 114,551,771 | 116,160,698 | 18,873,480 | 17,172,900 | 91.65       | 5.70   |                                                                                             |
| 8 | ctg350 | ctg352 | OMcontig_4     | 119,881,340 | 120,269,717 | 13,459,180 | 12,965,950 | 104.85      | 27.00  |                                                                                             |
| 8 | ctg352 | ctg353 | OMcontig_4     | 120,505,374 | 122,779,391 | 12,728,170 | 10,226,010 | 228.14      | 10.03  |                                                                                             |
| 8 | ctg353 | ctg354 | OMcontig_4     | 124,113,549 | 124,240,886 | 8,862,800  | 8,369,160  | 366.30      | 287.66 |                                                                                             |
| 8 | ctg354 | ctg355 | OMcontig_32    | 137,340,404 | 137,440,908 | 4,948,720  | 5,094,330  | 45.11       | 44.88  |                                                                                             |
| 8 | ctg355 | ctg356 | OMcontig_32    | 138,104,869 | 139,763,786 | 5,763,660  | 7,534,660  | 112.08      | 6.76   |                                                                                             |
| 8 | ctg356 | ctg358 | OMcontig_32    | 141,144,343 | 142,876,261 | 8,924,710  | 10,679,860 | 23.23       | 1.34   |                                                                                             |
| 8 | ctg360 | ctg362 | OMcontig_35    | 159,320,170 | 159,381,669 | 15,491,120 | 15,347,760 | 81.86       | 133.11 |                                                                                             |
| 8 | ctg362 | ctg363 | OMcontig_35    | 163,161,486 | 163,561,404 | 11,628,890 | 11,062,630 | 166.34      | 41.59  |                                                                                             |
| 8 | ctg363 | ctg364 | OMcontig_35    | 167,418,574 | 168,784,759 | 7,115,000  | 5,807,280  | -58.47      | 4.28   |                                                                                             |
| 8 | ctg364 | ctg365 | OMcontig_35    | 170,464,570 | 170,517,291 | 4,165,030  | 4,081,170  | 31.14       | 59.06  |                                                                                             |
| 8 | ctg365 | ctg366 | OMcontig_35    | 170,765,840 | 170,905,719 | 3,827,710  | 3,653,520  | 34.31       | 24.53  |                                                                                             |
| 9 | ctg441 | ctg368 | OMcontig_51    |             |             |            |            | see comment |        | ctg441 was inverted                                                                         |
| 9 | ctg368 | ctg369 | OMcontig_51    |             |             |            |            | see comment |        | ctg369 was inverted                                                                         |
| 9 | ctg369 | ctg370 | OMcontig_51    |             |             |            |            | see comment |        | ctg369 was inverted                                                                         |
| 9 | ctg370 | ctg373 | OMcontig_18    | 12,595,568  | 15,965,905  | 44,378,870 | 40,784,230 | 224.30      | 6.66   | across three FPC gaps                                                                       |

|    |        |        |                |             |             |            |            |             |         |                                                                              |
|----|--------|--------|----------------|-------------|-------------|------------|------------|-------------|---------|------------------------------------------------------------------------------|
| 9  | ctg381 | ctg377 | OMcontig_18    | 31,461,709  | 31,735,930  | 25,039,730 | 23,652,480 | 1113.03     | 405.89  |                                                                              |
| 9  | ctg378 | ctg367 | OMcontig_18    | 37,425,767  | 38,660,929  | 17,942,790 | 16,723,470 | -15.84      | 1.28    |                                                                              |
| 9  | ctg367 | ctg374 | OMcontig_18    | 43,160,504  | 43,290,050  | 12,196,300 | 12,008,760 | 57.99       | 44.77   |                                                                              |
| 9  | ctg374 | ctg375 | OMcontig_18    | 44,909,784  | 47,593,781  | 10,338,420 | 7,643,040  | 11.38       | 0.42    |                                                                              |
| 9  | ctg375 | ctg214 | OMcontig_18    |             |             |            |            | see comment |         | ctg214 was inverted                                                          |
| 9  | ctg106 | ctg432 | OMcontig_58    | 60,378,434  | 60,400,617  | 3,242,282  | 1,730,798  | 1489.30     | 6713.70 |                                                                              |
| 9  | ctg432 | ctg448 | OMcontig_55    | 64,952,653  | 65,016,516  | 5,004,000  | 4,174,380  | 765.76      | 1199.06 |                                                                              |
| 9  | ctg197 | ctg491 | OMcontig_17/58 |             |             |            |            | see comment |         | ctg491 should be moved to between ctg106 and ctg432                          |
| 9  | ctg491 | ctg431 | OMcontig_58/17 |             |             |            |            | see comment |         | ctg491 should be moved to between ctg106 and ctg432                          |
| 9  | ctg431 | ctg376 | OMcontig_17    | 80,132,348  | 80,172,031  | 10,293,140 | 10,327,270 | -5.55       | 13.99   |                                                                              |
| 9  | ctg380 | ctg473 | OMcontig_17    |             |             |            |            | see comment |         | ctg473 was inverted                                                          |
| 9  | ctg473 | ctg382 | OMcontig_17    |             |             |            |            | see comment |         | ctg473 was inverted                                                          |
| 9  | ctg382 | ctg383 | OMcontig_17    | 110,996,910 | 111,155,183 | 41,399,910 | 41,610,250 | 52.07       | 32.90   |                                                                              |
| 9  | ctg383 | ctg384 | OMcontig_23    | 117,182,224 | 117,756,572 | 747,060    | 2,207,150  | 885.74      | 154.22  |                                                                              |
| 9  | ctg384 | ctg385 | OMcontig_23    | 118,664,751 | 119,034,882 | 3,114,100  | 3,557,540  | 73.31       | 19.81   |                                                                              |
| 9  | ctg385 | ctg386 | OMcontig_23    | 125,539,604 | 129,171,668 | 10,145,070 | 13,909,510 | 132.38      | 3.64    |                                                                              |
| 9  | ctg386 | ctg387 | OMcontig_23    | 129,403,145 | 129,600,608 | 14,134,020 | 14,391,070 | 59.59       | 30.18   |                                                                              |
| 9  | ctg387 | ctg388 | OMcontig_23    | 134,681,115 | 135,753,752 | 19,498,640 | 20,580,380 | 9.10        | 0.85    |                                                                              |
| 9  | ctg388 | ctg389 | OMcontig_23    | 136,159,869 | 136,216,994 | 20,981,379 | 21,044,560 | 6.06        | 10.60   |                                                                              |
| 9  | ctg389 | ctg390 | OMcontig_23    | 141,203,299 | 142,622,569 | 26,120,050 | 27,635,000 | 95.68       | 6.74    |                                                                              |
| 9  | ctg390 | ctg391 | OMcontig_23    | 143,910,969 | 144,049,258 | 28,895,760 | 29,098,230 | 64.18       | 46.41   |                                                                              |
| 10 | ctg392 | ctg393 | OMcontig_21    | 4,745,285   | 8,519,898   | 35,534,990 | 31,613,110 | 147.27      | 3.90    |                                                                              |
| 10 | ctg393 | ctg394 | OMcontig_21    | 10,857,911  | 12,116,659  | 29,290,290 | 28,531,770 | -500.23     | 39.74   | across two FPC gaps                                                          |
| 10 | ctg394 | ctg395 | OMcontig_21    | 14,420,385  | 15,013,830  | 26,236,030 | 25,484,460 | 158.13      | 26.65   |                                                                              |
| 10 | ctg395 | ctg397 | OMcontig_21    | 23,781,743  | 23,950,047  | 16,562,910 | 16,314,910 | 79.70       | 47.35   |                                                                              |
| 10 | ctg397 | ctg398 | OMcontig_21    | 26,468,740  | 28,853,832  | 13,850,790 | 11,420,800 | 44.90       | 1.88    |                                                                              |
| 10 | ctg398 | ctg399 | OMcontig_21/37 |             |             |            |            | see comment |         | ctg399 does not belong here, and should be moved to between ctg84 and ctg400 |
| 10 | ctg399 | ctg84  | OMcontig_37/21 |             |             |            |            | see comment |         | ctg399 does not belong here, and should be moved to between ctg84 and ctg400 |
| 10 | ctg400 | ctg401 | OMcontig_37    | 69,087,249  | 69,252,028  | 2,403,560  | 2,332,250  | -93.47      | 56.72   |                                                                              |
| 10 | ctg401 | ctg402 | OMcontig_45    | 75,921,541  | 75,962,596  | 4,535,370  | 4,702,680  | 126.26      | 307.53  |                                                                              |
| 10 | ctg402 | ctg403 | OMcontig_45    | 76,757,144  | 79,654,502  | 5,479,910  | 8,380,380  | 3.11        | 0.11    |                                                                              |
| 10 | ctg403 | ctg404 | OMcontig_45    | 79,876,504  | 82,747,576  | 8,605,390  | 11,682,530 | 206.07      | 7.18    |                                                                              |
| 10 | ctg405 | ctg406 | OMcontig_8     | 84,656,175  | 85,867,808  | 65,163,620 | 63,884,590 | 67.40       | 5.56    |                                                                              |
| 10 | ctg406 | ctg408 | OMcontig_8     | 87,977,999  | 89,277,835  | 61,778,520 | 60,486,610 | -7.93       | 0.61    |                                                                              |
| 10 | ctg408 | ctg409 | OMcontig_8     | 91,113,824  | 91,902,335  | 58,642,300 | 57,801,990 | 51.80       | 6.57    |                                                                              |
| 10 | ctg409 | ctg410 | OMcontig_8     | 97,775,874  | 98,003,015  | 51,824,320 | 51,581,980 | 15.20       | 6.69    |                                                                              |
| 10 | ctg410 | ctg411 | OMcontig_8     | 99,850,435  | 99,883,100  | 49,656,340 | 49,614,340 | 9.34        | 28.58   |                                                                              |
| 10 | ctg411 | ctg721 | OMcontig_8     | 112,928,266 | 113,014,218 | 36,512,760 | 36,392,270 | 34.54       | 40.18   |                                                                              |
| 10 | ctg721 | ctg412 | OMcontig_8     | 113,303,726 | 113,428,811 | 36,101,420 | 35,876,270 | 100.07      | 80.00   |                                                                              |
| 10 | ctg412 | ctg413 | OMcontig_8     | 120,399,486 | 123,951,414 | 28,832,650 | 25,298,550 | -17.83      | 0.50    |                                                                              |
| 10 | ctg413 | ctg414 | OMcontig_8     | 130,841,449 | 132,724,232 | 18,406,510 | 16,502,860 | 20.87       | 1.11    |                                                                              |
| 10 | ctg419 | ctg420 | OMcontig_8     | 147,451,237 | 148,311,710 | 2,211,110  | 1,386,210  | -35.57      | 4.13    |                                                                              |

\*Note: negative gap size means that there are extra sequences included in the sequence pseudomolecules; Difference (%) = [gap size/(|AlignedSeqFlank1-AlignedSeqFlank2|/1000)]\*100%, and we usually allow <= 10% optical sizing error.
